# Supplementary material for: Personalized recurrence risk assessment following the birth of a child with a pathogenic de novo mutation
Source: Nat Commun. 2023 Feb 15;14:853. doi: 10.1038/s41467-023-36606-w (PMC9932158; doi:10.1038/s41467-023-36606-w)
Supplement: Supplementary file 4 — Supplementary Data 1-4 [file 41467_2023_36606_MOESM4_ESM.xlsx]

## Sheet: Supplementary Data 1
Supplementary Data 1. Overview and characteristics of the 61 DNMs from the 60 family trios enrolled in the PREGCARE study (with individual details for each step of the three-tier approach: primer locations, regions and results)
Family ID	Diagnosis	Age of the father at recruitment into the study (years)	Age of the mother at recruitment into the study (years)	Age of the proband at recruitment into the study (years)	Sex of the proband (Female/Male)	Proband alive at recruitment into the study? (YES/NO)	Multiple affected pregnancies? (YES/NO)	Method used for the original clinical diagnosis of the likely pathogenic DNM in the proband - and confirmation of the DNM absence from parental samples (to establish the de novo status of the variant)	Gene name	Characteristics of the de novo mutation (genomic location [GRCh38.p12], cDNA ref and coordinates, encoded protein change)			Number of samples successfully analyzed / collected	1.Verification of family relationship	2. Detection of parental or postzygotic mosaicism by Deep-Sequencing of the PCR amplicon containing the family-specific mutation site (see also Supplementary Data 2)							3. Haplotyping using long-read sequencing and an informative SNP close ot the DNM to establish the parent-of-origin of the DNM (see also Supplementary Data 3A &3B)												4. Stratification into one of 7 categories (see Figure 1 for definition of different categories)
														smMIP Assay - # informative SNPs supporting trio relationship	Method used	Location of forward primer	Location of reverse primer	Size of amplicon w/o primers	Target region w/o primers	Sequencing depth: average [range]	Deep-NGS results	Method used	Region 1 - location of forward primer	Region 1 - location of reverse primer	Region 1 - target region w/o primers	Region 1 - size of amplicon w/o primers	Region 2 - location of forward primer	Region 2 - location of reverse primer	Region 2 - target region w/o primers	Region 2 - size of amplicon w/o primers	Total genomic region w/o primers	Size of total genomic region w/o primers	Parent-of-origin results	Category
FAM01	Microcephaly	41.5606	38.2067	0.84052	F	Y	N	Proband: targeted NGS (panel) - Parents: dideoxy sequencing of the exon containing the DNM	KIF11	NC_000010.11:g.92,632,551G>C	NM_004523.3:c.1560G>C	p.(Lys520Asn)	8 / 14	52	Deep-NGS	10:92632484-92632505	10:92632639-92632658	133	10:92632506-92632638	33905 [2784-59608]	Maternal mixed mosaicism: VAF 0.26%-1.01%	Deep-NGS	NA	NA	NA	NA	NA	NA	NA	NA	NA	NA	maternal	F
FAM02	Noonan syndrome	34.7461	31.8111	0.733744	M	Y	N	Proband: targeted NGS (panel) - Parents: dideoxy sequencing of the exon containing the DNM	RIT1	NC_000001.11:g.155,904,496A>C	NM_06912.6:c.244T>G	p.(Phe82Val)	14 / 14	37	Deep-NGS	1:155904408-155904430	1:155904539-155904560	108	1:155904431-155904538	23066 [1523-44716]	No evidence of mosaicism	Long-read Sequencing (ONT)	1:155899481-155899500	1:155904539-155904560	1:155899501-155904538	5038	NA	NA	NA	NA	1:155899501-155904538	5038	paternal	A
FAM03	Ohdo syndrome	37.3717	29.3279	n/a	M	N	N	Proband: WES (DDD study) - Parents: dideoxy sequencing of the exon containing the DNM	KAT6B	NC_000010.11:g.75,022,006delG	NM_012330.4:c.3147delG	p.(Glu1050Argfs*64)	12 / 12	40	Deep-NGS	10:75021950-75021971	10:75022037-75022056	65	10:75021972-75022036	28519 [66-72623]	No evidence for parental mosaicism or a postzygotic mutation	Long-read Sequencing (ONT)	10:75008268-75008287	10:75022037-75022056	10:75008288-75022036	13749	10:75021950-75021971	10:75035719-75035738	10:75021972-75035718	13747	10:75008288-75035718	27431	unresolved	A/D/E
FAM04	Tuberous sclerosis 2	36.2683	33.7632	2.11362	M	Y	N	Proband: targeted NGS (panel) - Parents: dideoxy sequencing of the exon containing the DNM	TSC2	NC_000016.10:g.2,086,242A>G	NM_000548.4:c.4712A>G	p.(Tyr1571Cys)	14 / 14	40	Deep-NGS	16:2086203-2086222	16:2086293-2086312	70	16:2086223-2086292	19338 [11713-32656]	No evidence for parental mosaicism or a postzygotic mutation	Long-read Sequencing (ONT)	16:2075632-2075651	16:2086293-2086312	16:2075652-2086292	10641	NA	NA	NA	NA	16:2075652-2086292	10641	paternal	A
FAM05	CHARGE syndrome	28.4983	25.3032	0.999316	M	Y	N	dideoxy sequencing	CHD7	NC_000008.11:g.60,861,022A>G	NM_017780.3:c.7727A>G	p.(Asp2576Gly)	13 / 14	47	Deep-NGS	8:60860947-60860968	8:60861067-60861088	98	8:60860969-60861066	30063 [19123-48321]	No evidence for parental mosaicism or a postzygotic mutation	Long-read Sequencing (ONT)	NA	NA	NA	NA	8:60860947-60860968	8:60872946-60872965	8:60860969-60872945	11977	8:60860969-60872945	11977	paternal	A
FAM06	Global delay, microcephaly	23.5346	23.0472	4.92813	F	Y	N	Trio WGS (GeL) followed by clinical validation using dideoxy sequencing	TUBA1A	NC_000012.12:g.49,185,098T>C	NM_006009.4:c.1268A>G	p.(Glu423Gly)	14 / 14	43	Deep-NGS	12:49185013-49185037	12:49185135-49185156	97	12:49185038-49185134	13129 [319-29650]	No evidence for parental mosaicism or a postzygotic mutation	Long-read Sequencing (ONT)	12:49180260-49180284	12:49185135-49185156	12:49180285-49185134	4850	NA	NA	NA	NA	12:49180285-49185134	4850	paternal	A
FAM07	Osteogenesis imperfecta II	34.4942	40.9062	n/a	M	N	N	Proband: targeted NGS (panel) - Parents: dideoxy sequencing of the exon containing the DNM	COL1A2	NC_000007.14:g.94,417,833T>G	NM_000089.3:c.1971+2T>G	splice mutation	12 / 12	37	Deep-NGS	7:94417767-94417786	7:94417882-94417901	95	7:94417787-94417881	27309 [4508-50646]	No evidence for parental mosaicism or a postzygotic mutation	Long-read Sequencing (ONT)	7:94406806-94406825	7:94417882-94417901	7:94406826-94417881	11056	NA	NA	NA	NA	7:94406826-94417881	11056	paternal	A
FAM08	CHARGE syndrome	37.8919	33.6646	2.32444	M	Y	N	dideoxy sequencing	CHD7	NC_000008.11:g.60,824,021G>C	NM_017780.3:c.3378+5G>C	splice mutation	12 / 14	46	Deep-NGS	8:60823954-60823973	8:60824062-60824081	88	8:60823974-60824061	24236 [0-44658]	No evidence for parental mosaicism or a postzygotic mutation	Long-read Sequencing (ONT)	8:60809121-60809140	8:60824062-60824081	8:60809141-60824061	14921	NA	NA	NA	NA	8:60809141-60824061	14921	paternal	A
FAM09	Ohdo syndrome	26.935	27.4552	3.18138	M	Y	N	Proband: dideoxy sequencing, followed by WES - Parents: dideoxy sequencing of the exon containing the DNM	KAT6B	NC_000010.11:g.75,029,029_75,029,030delCT	NM_012330.4:c.4205_4206delCT	p.(Ser1402Cysfs*5)	13 / 13	58	Deep-NGS	10:75028964-75028986	10:75029081-75029101	94	10:75028987-75029080	33614 [294-50992]	No evidence for parental mosaicism or a postzygotic mutation	Long-read Sequencing (ONT)	NA	NA	NA	NA	10:75028964-75028986	10:75045505-75045524	10:75028987-75045504	16518	10:75028987-75045504	16518	maternal	D/E
FAM10	Noonan syndrome	42.1656	37.8919	0.859685	M	Y	N	Proband: targeted NGS (panel) - Parents: dideoxy sequencing of the exon containing the DNM	RAF1	NC_000003.12:g.12,604,200G>A	NM_002880.3:c.770C>T	p.(Ser257Leu)	14 / 14	49	Deep-NGS	3:12604117-12604136	3:12604229-12604248	92	3:12604137-12604228	23024 [11509-43517]	No evidence for parental mosaicism or a postzygotic mutation	Long-read Sequencing (ONT)	NA	NA	NA	NA	3:12604117-12604136	3:12615189-12615208	3:12604137-12615188	11052	3:12604137-12615188	11052	paternal	A
FAM11	Sotos syndrome	37.0541	38.0151	3.51266	M	Y	N	dideoxy sequencing	NSD1	NC_000005.10:g.177,210,200_177,210,201del	NM_022455.4:c.1801_1802del	p.(Lys601Valfs*7)	14 / 14	46	Deep-NGS	5:177210082-177210101	5:177210275-177210294	173	5:177210102-177210274	17598 [0-44416]	No evidence for parental mosaicism or a postzygotic mutation	Long-read Sequencing (ONT)	5:177208298-177208323	5:177210333-177210352	5:177208324-177210332	2009	NA	NA	NA	NA	5:177208324-177210332	2009	paternal	A
FAM12a	Spinocerebellar ataxia 44 (SCA44)	41.4538	41.1937	6.68857	F	Y	N	Proband: targeted NGS (panel) - Parents: dideoxy sequencing of the exon containing the DNM	GRM1	NC_000006.12:g.146,434,376dupC	NM_001278064.2:c.3165dupC	p.(Gly1056Argfs*49)	14 / 14	60	Deep-NGS	6:146434294-146434313	6:146434460-146434478	146	6:146434314-146434459	21013 [2953-88803]	No evidence for parental mosaicism or a postzygotic mutation	Deep-NGS	NA	NA	NA	NA	NA	NA	NA	NA	NA	NA	paternal	A
FAM12b	Rett syndrome						N		MECP2	NC_000023.11:g.154,030,621_154,030,664del	NM_004992.4:c.1164_1207del	p.(Pro389*)			allele-specific PCR	see Methods/Supplementary Note 2					No evidence for parental mosaicism or a postzygotic mutation	Long-read Sequencing (ONT)	X:154020548-154020567	X:154030777-154030796	X:154020568-154030776	10209	NA	NA	NA	NA	X:154020568-154030776	10209	unresolved	A/D/E
FAM13	Epileptic encephalopathy	29.9274	27.1211	1.0486	F	Y	N	Trio WGS (research study) followed by clinical validation via dideoxy sequencing of the exon containing the DNM	RHOBTB2	NC_000008.11:g.23,007,627G>A	NM_001160036.1:c.1448G>A	p.(Arg483His)	14 / 14	50	Deep-NGS	8:23007560-23007579	8:23007711-23007730	131	8:23007580-23007710	15532 [2794-53581]	No evidence for parental mosaicism or a postzygotic mutation	Long-read Sequencing (ONT)	NA	NA	NA	NA	8:23007349-23007372	8:23021023-23021048	8:23007373-23021022	13650	8:23007373-23021022	13650	maternal	D/E
FAM15	Cystic hygroma, hydronephrosis, cardiac anomaly	43.1732	33.8125	n/a	M	N	N	Proband: targeted NGS (panel) - Parents: dideoxy sequencing of the exon containing the DNM	RAF1	NC_000003.12:g.12,604,194G>C	NM_001354690.2:c.776C>G	p.(Ser259Cys)	12 / 12	55	Deep-NGS	3:12604168-12604189	3:12604255-12604275	65	3:12604190-12604254	23262 [4826-96481]	No evidence for parental mosaicism or a postzygotic mutation	Long-read Sequencing (ONT)	3:12598364-12598383	3:12604250-12604270	3:12598384-12604249	5866	3:12604113-12604132	3:12612101-12612120	3:12604133-12612100	7968	3:12598384-12612100	13717	paternal	A
FAM16	Tuberous sclerosis	41.1636	34.7817	2.60643	M	Y	N	Proband: targeted NGS (panel) - Parents: dideoxy sequencing of the exon containing the DNM	TSC2	NC_000016.10:g.2,088,585dupT	NM_000548.4:c.5399dupT	p.(Glu1801Glyfs*85)	14 / 14	45	Deep-NGS	16:2088439-2088458	16:2088640-2088659	181	16:2088459-2088639	61280 [12972-219591]	No evidence for parental mosaicism or a postzygotic mutation	Long-read Sequencing (ONT)	16:2079311-2079335	16:2088792-2088817	16:2079336-2088791	9456	NA	NA	NA	NA	16:2079336-2088791	9456	paternal	A
FAM17	Noonan syndrome 1	35.0664	37.1389	n/a	F	N	Y	Proband: targeted NGS (panel) - Parents: dideoxy sequencing of the exon containing the DNM - Note: 3 affected pregnancies	PTPN11	NC_000012.12:g.112,477,651T>C	NM_002834.4:c.854T>C	p.(Phe285Ser)	12 / 12	43	Deep-NGS	12:112477564-112477583	12:112477739-112477762	155	12:112477584-112477738	13112 [638-32002]	Maternal mixed mosaicism: VAF 0.6% – 9.8%	Long-read Sequencing (ONT)	12:112468381-112468405	12:112477914-112477940	12:112468406-112477913	9508	NA	NA	NA	NA	12:112468406-112477913	9508	maternal	F
FAM18	CHARGE syndrome	37.6126	32.6982	4.23819	F	Y	N	dideoxy sequencing	CHD7	NC_000008.11:g.60,821,831T>G	NM_017780.4:c.2739T>G	p.(Tyr913*)	14 / 14	43	Deep-NGS	8:60821788-60821809	8:60821921-60821940	111	8:60821810-60821920	20558 [7582-39063]	No evidence for parental mosaicism or a postzygotic mutation	Long-read Sequencing (ONT)	NA	NA	NA	NA	8:60821781-60821805	8:60835741-60835764	8:60821806-60835740	13935	8:60821806-60835740	13935	unresolved	A/D/E
FAM19	Noonan syndrome	34.3409	33.1362	1.82067	F	Y	N	Proband: targeted NGS (panel) - Parents: dideoxy sequencing of the exon containing the DNM	SHOC2	NC_000010.11:g.110,964,362A>G	NM_007373.4:c.4A>G	p.(Ser2Gly)	13 / 14	45	Deep-NGS	10:110964233-110964256	10:110964439-110964459	182	10:110964257-110964438	19680 [153-31705]	No evidence for parental mosaicism or a postzygotic mutation	Long-read Sequencing (ONT)	10:110951980-110952001	10:110964568-110964587	10:110952002-110964567	12566	10:110964233-110964256	10:110972446-110972466	10:110964257-110972445	8189	10:110952002-110972445	20444	paternal	A
FAM20	Developmental delay and complex seizures	57.4292	35.269	6.33265	M	Y	N	Proband: WES (DDD study) - Parents: dideoxy sequencing of the exon containing the DNM	CLTC	NC_000017.11:g.59,681,719T>C	NM_004859.3:c.3322T>C	p.(Trp1108Arg)	14 / 14	42	Deep-NGS	17:59681670-59681689	17:59681819-59681840	129	17:59681690-59681818	17494 [127-46041]	No evidence for parental mosaicism or a postzygotic mutation	Long-read Sequencing (ONT)	17:59669479-59669503	17:59681930-59681958	17:59669504-59681929	12426	17:59681520-59681545	17:59693838-59693864	17:59681546-59693837	12292	17:59669504-59693837	24334	paternal	A
FAM21	Mandibulofacial dysostosis with microcephaly	50.2752	33.399	4.51472	F	Y	N	dideoxy sequencing	EFTUD2	NC_000017.11:g.44,880,581dupA	NM_004247.4:c.592dupT	p.(Tyr198Leufs*16)	14 / 14	38	Deep-NGS	17:44880461-44880480	17:44880600-44880619	119	17:44880481-44880599	16132 [6769-33504]	No evidence for parental mosaicism or a postzygotic mutation	Deep-NGS	NA	NA	NA	NA	NA	NA	NA	NA	NA	NA	paternal	A
FAM22	Cardiofaciocutaneous syndrome	44.5749	40.1068	1.64271	F	Y	N	Proband: targeted NGS (panel) - Parents: dideoxy sequencing of the exon containing the DNM	BRAF	NC_000007.14:g.140,801,502T>C	NM_004333.6:c.770A>G	p.(Gln257Arg)	14 / 14	55	Deep-NGS	7:140801468-140801448	7:140801616-140801640	147	7:140801469-140801615	26076 [2499-77218]	No evidence for parental mosaicism or a postzygotic mutation	Long-read Sequencing (ONT)	7:140790572-140790598	7:140801747-140801777	7:140790599-140801746	11148	7:140801442-140801469	7:140811947-140811972	7:140801470-140811946	10477	7:140790599-140811946	21,348	unresolved	A/D/E
FAM24	Osteopathia striata with cranial sclerosis	57.9959	42.9843	7.55373	F	Y	N	Proband: WES (DDD study) - Parents: dideoxy sequencing of the exon containing the DNM	AMER1	NC_000023.11:g.64,192,230G>A	NM_152424.4:c.1057C>T	p.(Arg353*)	13 / 14	49	Deep-NGS	X:64192156-64192176	X:64192296-64192315	119	X:64192177-64192295	20040 [2829-50764]	No evidence for parental mosaicism or a postzygotic mutation	Long-read Sequencing (ONT)	NA	NA	NA	NA	X:64,191,968-64,191,987	X:64194385-64194404	X:64191988-64194384	2397	X:64191988-64194384	2397	paternal	A
FAM25	PURA syndrome	40.4216	35.1047	4.18891	M	Y	N	Proband: WGS (GeL) followed by clinical validation of proband and parental DNA using dideoxy sequencing	PURA	NC_000005.10:g.140,114,651T>G	NM_05859.5:c.470T>G	p.(Met157Arg)	14 / 14	42	Deep-NGS	5:140114520-140114538	5:140114694-140114710	155	5:140114539-140114693	18615 [4064-66217]	No evidence for parental mosaicism or a postzygotic mutation	Long-read Sequencing (ONT)	5:140101177-140101196	5:140114788-140114807	5:140101197-140114787	13591	5:140114520-140114538	5:140120582-140120601	5:140114539-140120581	6043	5:140101197-140120581	19385	maternal	D/E
FAM26	Opitz G/BBB syndrome type I	31.2553	29.1417	0.77755	M	Y	N	dideoxy sequencing	MID1	NC_000023.11:g.10,459,657_10,459,660dup	NM_000381.4:c.1433_1436dup	p.(Lys480Valfs*9)	12 / 14	50	Deep-NGS	X:10459581-10459603	X:10459764-10459744	140	X:10459604-10459743	22135 [6648-31602]	No evidence for parental mosaicism or a postzygotic mutation	not performed	NA	NA	NA	NA	NA	NA	NA	NA	NA	NA	maternal	D/E
FAM27	Rett syndrome	36.0192	33.243	2.64476	F	Y	N	dideoxy sequencing	MECP2	NC_000023.11:g.154,031,022delC	NM_004992.3:c.806delG	p.(Gly269Alafs*20)	13 / 14	54	Deep-NGS	X:154030901-154030920	X:154031049-154031068	128	X:154030921-154031048	22722 [13975-51154]	Paternal gonadal mosaicism: VAF 0.23%	Long-read Sequencing (ONT)	X:154020327-154020346	X:154031049-154031068	X:154020347-154031048	10702	X:154030901-154030920	X:154045087-154045106	X:154030921-154045086	14166	X:154020347-154045086	24740	paternal	B
FAM28	Wiedemann Steiner syndrome	26.8665	27.4935	1.64545	F	Y	N	Proband: WES - Parents: dideoxy sequencing of the exon containing the DNM	KMT2A	NC_000011.10:g.118,473,689C>T	NM_001197104.2:c.2530C>T	p.(Gln844*)	14 / 14	54	Deep-NGS	11:118473622-118473638	11:118473867-118473889	228	11:118473639-118473866	16559 [6738-28475]	No evidence for parental mosaicism or a postzygotic mutation	Long-read Sequencing (ONT)	11:118461711-118461731	11:118473867-118473889	11:118461732-118473866	12135	11:118473622-118473638	11:118484440-118484460	11:118473639-118484439	10801	11:118461732-118484439	22708	unresolved	A/D/E
FAM30	Long QT syndrome (LQTS)	35.6386	35.4853	0.750171	M	Y	N	Proband: targeted NGS (panel) - Parents: dideoxy sequencing of the exon containing the DNM	CALM2	NC_000002.12:g.47,161,756C>A	NM_001743.6:c.388G>T	p.(Asp130Tyr)	13 / 14	47	Deep-NGS	2:47161628-47161651	2:47161816-47161836	164	2:47161652-47161815	14032 [537-42059]	No evidence for parental mosaicism or a postzygotic mutation	Long-read Sequencing (ONT)	2:47149319-47149338	2:47161816-47161836	2:47149339-47161815	12477	2:47161628-47161651	2:47173524-47173543	2:47161652-47173523	11872	2:47149339-47173523	24185	paternal	A
FAM31	SYNGAP1-related disorder	44.6078	37.9165	3.69062	F	Y	N	Trio WES	SYNGAP1	NC_000006.12:g.33,437,774_33,437,780del	NM_006772.3:c.869_875del	p.(Leu290Hisfs*55)	14 / 14	57	Deep-NGS	6:33437658-33437677	6:33437828-33437847	150	6:33437678-33437827	28329 [8751-45840]	No evidence for parental mosaicism or a postzygotic mutation	Long-read Sequencing (ONT)	6:33430740-33430759	6:33437828-33437847	6:33430760-33437827	7068	NA	NA	NA	NA	6:33430760-33437827	7068	paternal	A
FAM32	Ankyloblepharon-ectodermal dysplasia-clefting syndrome	36.167	37.6728	1.14442	M	Y	N	dideoxy sequencing	TP63	NC_000003.12:g.189,890,806G>T	NM_003722.5:c.1670G>T	p.(Gly557Val)	14 / 14	53	Deep-NGS	3:189890680-189890699	3:189890827-189890846	127	3:189890700-189890826	12656 [2907-36950]	No evidence for parental mosaicism or a postzygotic mutation	Long-read Sequencing (ONT)	3:189877699-189877718	3:189890827-189890846	3:189877719-189890826	13108	3:189890680-189890699	3:189904197-189904216	3:189890700-189904196	13497	3:189877719-189904196	26478	paternal	A
FAM33	Epidermolysis bullosa	32.3258	36.0493	2.25599	F	Y	N	dideoxy sequencing	KRT5	NC_000012.12:g.52,516,655A>G	NM_000424.4:c.1421T>C	p.(Leu474Pro)	14 / 14	46	Deep-NGS	12:52516562-52516585	12:52516691-52516711	105	12:52516586-52516690	30864 [614-60302]	postzygotic mutation: VAF 7.7%-41.3%	not performed	NA	NA	NA	NA	NA	NA	NA	NA	NA	NA	not relevant	G
FAM34	Neonatal seizures/infantile epilepsy	40.0246	38.538	2.02053	F	Y	N	Proband: targeted NGS (panel) - Parents: dideoxy sequencing of the exon containing the DNM	KCNQ2	NC_000020.11:g.63,407,094_63,407,101del	NM_172107.4:c.2162_2169del	p.(Gln721Profs*141)	14 / 14	51	Deep-NGS	20:63406997-63407014	20:63407199-63407218	184	20:63407015-63407198	38234 [3987-71996]	Paternal mixed mosaicism: VAF sperm 8%; other tissues 0.6%-4.3%	Long-read Sequencing (ONT)	20:63394331-63394351	20:63407199-63407218	20:63394352-63407198	12847	20:63406997-63407014	20:63420090-63420110	20:63407015-63420089	13075	20:63394352-63420089	25738	paternal	C
FAM35	Glass syndrome	52.5147	39.4908	3.93977	M	Y	N	Proband: targeted NGS (panel) - Parents: dideoxy sequencing of the exon containing the DNM	SATB2	NC_000002.12:g.199,349,042delG	NM_001172509.2:c.832delC	p.(His278Thrfs*16)	13 / 14	55	Deep-NGS	2:199348995-199349015	2:199349114-199349132	98	2:199349016-199349113	25084 [1-40804]	No evidence for parental mosaicism or a postzygotic mutation	Long-read Sequencing (ONT)	2:199335570-199335589	2:199349114-199349132	2:199335590-199349113	13524	2:199348995-199349015	2:199363186-199363205	2:199349016-199363185	14170	2:199335590-199363185	27596	paternal	A
FAM36	Larsen syndrome	39.4661	35.0691	1.28131	M	Y	N	Trio WES	FLNB	NC_000003.12:g.58,078,789C>G	NM_001457.3:c.614C>G	p.(Ala205Gly)	13 / 14	55	Deep-NGS	3:58078729-58078748	3:58078892-58078911	143	3:58078749-58078891	10863 [92-24446]	No evidence for parental mosaicism or a postzygotic mutation	Long-read Sequencing (ONT)	3:58065894-58065913	3:58078892-58078911	3:58065914-58078891	12978	3:58078729-58078748	3:58091755-58091774	3: 58078749-58091754	13006	3:58065914-58091754	25841	unresolved	A/D/E
FAM38	Xia-Gibbs syndrome	34.1109	34.9596	1.76318	F	Y	N	Trio WES	AHDC1	NC_000001.11:g.27548981delG	NM_001029882.3:c.3135delC	p.(Phe1046Serfs*96)	13 / 14	43	Deep-NGS	1:27548796-27548815	1:27549082-27549101	266	1:27548816-27549081	12963 [849-26485]	No evidence for parental mosaicism or a postzygotic mutation	Long-read Sequencing (ONT) + Allele-Specific PCR	1:27548796-27548815	1:27556792-27556811	1:27548816-27556791	7976	NA	NA	NA	NA	1:27548816-27556791	7976	maternal	D/E
FAM39	SATB2 Related syndrome	45.3415	44.4381	5.07598	F	Y	N	Proband: WGS (GeL) followed by clinical validation of proband and parental DNA using dideoxy sequencing	SATB2	NC_000002.12:g.199,348,709G>A	NM_001172509.2:c.1165C>T	p.(Arg389Cys)	13 / 14	54	Deep-NGS	2:199348640-199348664	2:199348830-199348849	165	2:199348665-199348829	20470 [0-37551]	No evidence for parental mosaicism or a postzygotic mutation	Long-read Sequencing (ONT)	2:199335571-199335590	2:199348830-199348849	2:199335591-199348829	13239	2:199348640-199348664	2:199360880-199360899	2:199348665-199360879	12215	2:199335591-199360879	25289	paternal	A
FAM41	Schinzel-Giedeon syndrome	40.5147	33.7331	0.887064	M	Y	N	Trio WES	SETBP1	NC_000018.10:g.44,951,942G>A	NM_015559.3:c.2602G>A	p.(Asp868Asn)	14 / 14	47	Deep-NGS	18:44951837-44951857	18:44952051-44952070	193	18:44951858-44952050	15022 [1981-21980]	No evidence for parental mosaicism or a postzygotic mutation	Long-read Sequencing (ONT)	8:44938282-44938301	18:44952051-44952070	8:44938302-44952050	13749	18:44951837-44951857	18:44966344-44966363	18:44951858-44966343	14486	18:44938302-44966343	28042	paternal	A
FAM42	Diamond-Blackfan anemia	30.204	34.6311	0.772074	F	Y	N	Proband: targeted NGS (panel) - Parents: dideoxy sequencing of the exon containing the DNM	RPS19	NC_000019.10:g.41,869,154_41,869,155del	NM_001022.4:c.296_297delTG	p.(Val99Glyfs*54)	14 / 14	48	Deep-NGS	19:41869069-41869090	19:41869241-41869262	150	19:41869091-41869240	16702 [5-33647]	No evidence for parental mosaicism or a postzygotic mutation	Deep-NGS	NA	NA	NA	NA	NA	NA	NA	NA	NA	NA	paternal	A
FAM43	CHARGE syndrome	32.2738	34.1656	1.73032	M	Y	N	dideoxy sequencing	CHD7	NC_000008.11:g.60,741,901C>T	NM_017780.4:c.469C>T	p.(Arg157*)	13 / 13	48	Deep-NGS	8:60741850-60741868	8:60741979-60741998	110	8:60741869-60741978	7240 [1513-14318]	No evidence for parental mosaicism or a postzygotic mutation	Long-read Sequencing (ONT)	8:60731900-60731919	8:60741979-60741998	8:60731920-60741978	10059	8:60741850-60741868	8:60753949-60753968	8:60741869-60753948	12080	8:60731920-60753948	22029	paternal	A
FAM44	Stickler syndrome	32.5503	30.0561	0.689938	M	Y	N	Proband: WES - Parents: dideoxy sequencing of the exon containing the DNM	COL2A1	NC_000012.12:g.47,975,568C>G	NM_001844.5:c.3635G>C	p.(Gly1212Ala)	14 / 14	44	Deep-NGS	12:47975524-47975543	12:47975631-47975651	87	12:47975544-47975630	6321 [0-12241]	No evidence for parental mosaicism or a postzygotic mutation	Long-read Sequencing (ONT)	12:47972639-47972658	12:47975631-47975651	12:47972659-47975630	2972	12:47975524-47975543	12:47988522-47988541	12:47975544-47988521	12978	12:47972659-47988521	15863	paternal	A
FAM45	DYNC1H1-associated cortical malformation	35.8823	36.334	3.15127	F	Y	N	Proband: targeted NGS (panel) - Parents: dideoxy sequencing of the exon containing the DNM	DYNCIHI	NC_000014.9:g.102,002,949C>T	NM_001376.5:c.4867C>T	p.(Arg1623Trp)	14 / 14	39	Deep-NGS	14:102002823-102002846	14:102002975-102002995	128	14:102002847-102002974	7015 [8-19928]	No evidence for parental mosaicism or a postzygotic mutation	Long-read Sequencing (ONT)	14:101987276-101987295	14:102002975-102002995	14:101987296-102002974	15679	14:102002823-102002846	14:102015890-102015909	14:102002847-102015889	13043	14:101987296-102015889	28594	maternal	D/E
FAM46	Cornelia De Lange syndrome	30.4394	29.2293	n/a	F	N	N	Trio WES	SMC3	NC_000010.11:g.110,602,966C>G	NM_005445.3:c.3439C>G	p.(Gln1147Glu)	12 / 12	56	Deep-NGS	10:110602890-110602909	10:110602993-110603015	83	10:110602910-110602992	6650 [2195-11714]	No evidence for parental mosaicism or a postzygotic mutation	Long-read Sequencing (ONT)	NA	NA	NA	NA	10:110602862-110602883	10:110614406-110614425	10:110602884-110614405	11522	10:110602884-110614405	11522	paternal	A
FAM47	Rhabdoid predisposition syndrome	28.3477	25.8015	n/a	F	N	N	Proband: targeted NGS (panel) - Parents: dideoxy sequencing of the exon containing the DNM	SMARCB1	NC_000022.11:g.23,825,396C>T	NM_003073.5:c.967C>T	p.(Gln323*)	10 / 12	46	Deep-NGS	22:23825334-23825353	22:23825513-23825533	159	22:23825354-23825512	7134 [0-19858]	No evidence for parental mosaicism or a postzygotic mutation	Long-read Sequencing (ONT)	22:23816017-23816036	22:23825513-23825533	22:23816037-23825512	9476	22:23825334-23825353	22:23837988-23838007	22:23825354-23837987	12634	22:23816037-23837987	21951	unresolved	A/D/E
FAM48	Cardiofaciocutaneous syndrome	40.9008	36.5257	1.93018	M	Y	N	Proband: targeted NGS (panel) - Parents: dideoxy sequencing of the exon containing the DNM	BRAF	NC_000007.14:g.140,801,536C>G	NM_004333.4:c.736G>C	p.(Ala246Pro)	14 / 14	53	Deep-NGS	7:140801483-140801502	7:140801616-140801639	113	7:140801503-140801615	5492 [24-21149]	No evidence for parental mosaicism or a postzygotic mutation	Long-read Sequencing (ONT)	7:140786658-140786677	7:140801616-140801639	7:140786678-140801615	14938	7:140801483-140801502	7:140814030-140814049	7:140801503-140814029	12527	7:140786678-140814029	27352	paternal	A
FAM49	Multiple abnormalities - 18weeks TOP	34.7899	35.7645	n/a	F	N	N	Proband: WES - Parents: dideoxy sequencing of the exon containing the DNM	MYRF	NC_000011.10:g.61,774,154G>A	NM_001127392.3:c.1303G>A	p.(Gly435Arg)	11 / 12	50	Deep-NGS	11:61774122-61774141	11:61774191-61774173	49	11:61774142-61774190	8444 [22-31110]	Paternal mixed mosaicism: VAF sperm 5.6%, other tissues 0%-0.36%	not performed	NA	NA	NA	NA	NA	NA	NA	NA	NA	NA	paternal	C
FAM50	Nail-Patella syndrome	31.7399	31.0554	1.64271	M	Y	N	dideoxy sequencing	LMX1B	NC_000009.12:g.126,693,213delG	NM_002316.3:c.631delG	p.(Asp211Metfs*64)	14 / 14	36	Deep-NGS	9:126693145-126693164	9:126693267-126693285	102	9:126693165-126693266	7944 [121-14477]	Maternal mixed mosaicism: VAF 9.2%-19.2%	not performed	NA	NA	NA	NA	NA	NA	NA	NA	NA	NA	maternal	F
FAM51	Dravet syndrome	29.1389	28.3833	1.04586	F	Y	N	Trio WES	SCN1A	NC_000002.12:g.166,037,862C>T	NM_001165963.4:c.2860G>A	p.(Glu954Lys)	13 / 14	51	Deep-NGS	2:166037822-166037841	2:166037945-166037964	103	2:166037842-166037944	5461 [0-9945]	No evidence for parental mosaicism or a postzygotic mutation	Long-read Sequencing (ONT)	2:166027923-166027942	2:166037945-166037964	2:166027943-166037944	10002	2:166037822-166037841	2:166047377-166047358	2:166037842-166047376	9535	2:166027943-166047376	19434	paternal	A
FAM53	Osteogenesis imperfecta type II (skeletal dysplasia)	41.232	37.4182	n/a	F	N	N	Trio WES	COL1A1	NC_000017.11:g.50,188,538C>T	NM_000088.4:c.3199G>A	p.(Gly1067Ser)	11 / 12	53	Deep-NGS	17:50188498-50188517	17:50188650-50188669	132	17:50188518-50188649	3269 [171-10754]	No evidence for parental mosaicism or a postzygotic mutation	Long-read Sequencing (ONT)	17:50180501-50180520	17:50188650-50188669	17:50180521-50188649	8129	17:50188498-50188517	17:50202640-50202659	17:50188518-50202639	14122	17:50180521-50202639	22119	maternal	D/E
FAM54	Schaaf-Yang syndrome	31.2635	34.4969	5.40726	F	Y	N	Proband: WGS (GeL) followed by clinical validation of proband and parental DNA using dideoxy sequencing	MAGEL2	NC_000015.10:g.23,645,482_23,645,516dup	NM_019066.5:c.2227_2261dup	p.(Thr755Glyfs*8)	14 / 14	44	allele-specific PCR	see Methods/Supplementary Note 2					No evidence for parental mosaicism or a postzygotic mutation	not performed	NA	NA	NA	NA	NA	NA	NA	NA	NA	NA	paternal	A
FAM55	Early-onset epileptic encephalopathy - Ohtahara syndrome	45.1636	35.8412	4.13963	M	Y	N	Trio WES	STXBP1	NC_000009.12:g.127,680,243G>A	NM_003165.6:c.1547+1G>A	splice mutation	14 / 14	44	Deep-NGS	9:127680200-127680219	9:127680281-127680300	61	9:127680220-127680280	4205 [86-54661]	No evidence for parental mosaicism or a postzygotic mutation	Long-read Sequencing (ONT)	9:127667055-127667074	9:127680281-127680300	9:127667075-127680280	13206	9:127680200-127680219	9:127694378-127694397	9:127680220-127694377	14158	9:127667075-127694377	27303	paternal	A
FAM56	Acute necrotizing encephalopathy	31.091	30.2423	n/a	M	N	N	Proband: targeted NGS (panel) - Parents: dideoxy sequencing of the exon containing the DNM	RANBP2	NC_000002.12:g.108,751,993C>T	NM_006267.4:c.1754C>T	p.(Thr585Met)	12 / 12	51	Deep-NGS	2:108751943-108751962	2:108752079-108752100	116	2:108751963-108752078	1660 [0-2790]	No evidence for parental mosaicism or a postzygotic mutation	Long-read Sequencing (ONT)	2:108740056-108740078	2:108752079-108752100	2:108740079-108752078	12000	2:108751943-108751962	2:108764004-108764023	2:108751963-108764003	12041	2:108740079-108764003	23925	maternal	D/E
FAM57	Hypotonia, ataxia, developmental delay and tooth enamel defect	44.6215	42.8501	11.217	M	Y	N	Trio WES	CTBP1	NC_000004.12:g.1,213,028G>A	NM_001012614.2:c.991C>T	p.(Arg331Trp)	14 / 14	50	Deep-NGS	4:1212978-1212997	4:1213118-1213137	120	4:1212998-1213117	7774 [1222-22115]	No evidence for parental mosaicism or a postzygotic mutation	Long-read Sequencing (ONT)	NA	NA	NA	NA	4:1212978-1212997	4:1226692-1226711	4:1212998-1226691	13694	4:1212998-1226691	13694	paternal	A
FAM58	Global delay, learning difficulties	53.0185	38.2231	8.01643	F	Y	N	Trio WGS (GeL) followed by clinical validation using dideoxy sequencing	GRIN2B	NC_000012.12:g.13,615,140C>A	NM_000834.4:c.1628G>T	p.(Gly543Val)	14 / 14	51	Deep-NGS	12:13615089-13615108	12:13615221-13615240	112	12:13615109-13615220	4044 [1-6894]	Paternal mixed mosaicism: VAF sperm 12.1%, other tissues 0.01%-1%	not performed	NA	NA	NA	NA	NA	NA	NA	NA	NA	NA	paternal	C
FAM59	Duane-Radial Ray syndrome	27.102	21.1554	0.613279	F	Y	N	Trio WES	SALL4	NC_000020.11:g.51,791,519delC	NM_020436.5:c.964delG	p.(Val322Cysfs*32)	14 / 14	41	Deep-NGS	20:51791472-51791491	20:51791572-51791591	80	20:51791492-51791571	4424 [125-8528]	No evidence for parental mosaicism or a postzygotic mutation	Long-read Sequencing (ONT)	20:51778121-51778140	20:51791572-51791591	20:51778141-51791571	13431	20:51791572-51791491	20:51803731-51803750	20:51791492-51803730	12239	20:51778141-51803730	25590	unresolved	A/D/E
FAM60	Weiss Kruszka syndrome	52.334	44.4216	14.7899	M	Y	Y	Trio WGS (GeL) followed by clinical validation using dideoxy sequencing Note: 3 affected children	ZNF462	NC_000009.12:g.106,927,743delC	NM_021224.6:c.3831delC	p.(Tyr1278Metfs*3)	14 / 14	51	Deep-NGS	9:106927689-106927708	9:106927865-106927884	156	9:106927709-106927864	7196 [158-20909]	Maternal mixed mosaicism: VAF 0.7%-3.3%	not performed	NA	NA	NA	NA	NA	NA	NA	NA	NA	NA	maternal	F
FAM61	Osteogenesis imperfecta	47.4059	41.2977	n/a	F	N	N	Proband: targeted NGS (panel) - Parents: dideoxy sequencing of the exon containing the DNM	COL1A2	NC_000007.14:g.94,420,409G>A	NM_000089.4:c.2152G>A	p.(Gly718Ser)	12 / 12	57	Deep-NGS	7:94420274-94420293	7:94420429-94420448	135	7:94420294-94420428	168470 [8823-295331]	No evidence for parental mosaicism or a postzygotic mutation	Long-read Sequencing (ONT)	7:94409376-94409395	7:94420429-94420448	7:94409396-94420428	11033	7:94420274-94420293	7:94427663-94427682	7:94420294-94427662	7369	7:94409396-94427662	18267	maternal	D/E
FAM62	Tuberous Sclerosis	44.9884	36.7474	1.01848	F	Y	N	Proband: targeted NGS (panel) - Parents: dideoxy sequencing of the exon containing the DNM	TSC1	NC_000009.12:g.132,912,382A>C	NM_000368.5:c.813T>G	p.(Tyr271*)	13 / 14	51	Deep-NGS	9:132912316-132912333	9:132912516-132912534	182	9:132912334-132912515	11398 [2536-85962]	No evidence for parental mosaicism or a postzygotic mutation	Long-read Sequencing (ONT)	9:132901801-132901820	9:132912516-132912534	9:132901821-132912515	10695	9:132912316-132912337	9:132920189-132920207	9:132912338-132920188	7851	9:132901821-132920188	18368	paternal	A
FAM64	Koolen-De Vries syndrome	52.0876	33.0376	n/a	M	N	N	Trio WES	KANSL1	NC_000017.11:g.46,171,228delG	NM_001193466.3:c.916delC	p.(Gln306Argfs*24)	12 / 12	56	Deep-NGS	17:46171099-46171118	17:46171295-46171317	176	17:46171119-46171294	5551 [1436-14196]	No evidence for parental mosaicism or a postzygotic mutation	Long-read Sequencing (ONT)	17:46162738-46162758	17:46171295-46171317	17:46162759-46171294	8536	17:46171099-46171118	17:46179053-46179070	17:46171119-46179052	7934	17:46162759-46179052	16294	paternal	A
FAM65	Borjeson-Forssman-Lehman syndrome	32.7693	33.0623	0.358658	F	Y	N	Trio WES	PHF6	NC_000023.11:g.134,413,497dupT	NM_032458.3:c.425dupT	p.(Leu142Phefs*6)	13 / 14	50	Deep-NGS	X:134413388-134413410	X:134413604-134413623	193	X:134413411-134413603	6663 [36-14036]	No evidence for parental mosaicism or a postzygotic mutation	Long-read Sequencing (ONT)	X:134413388-134413410	X:134422448-134422469	X:134413411-134422447	9037	X:134405937-134405957	X:134413604-134413623	X:134405958-134413603	7646	X:134405958-134422447	16490	unresolved	A/D/E
FAM66	ABCC9-related disorder	30.9131	33.306	3.12115	M	Y	N	Trio WES	ABCC9	NC_000012.12:g.21,818,238G>A	NM_005691.4:c.3683C>T	p.(Ala1228Val)	14 / 14	48	Deep-NGS	12:21818149-21818170	12:21818348-21818370	177	12:21818171-21818347	6599 [230-14750]	No evidence for parental mosaicism or a postzygotic mutation	Long-read Sequencing (ONT)	12:21809476-21809495	12:21818348-21818370	12:21809496-21818347	8852	12:21818149-21818170	12:21826633-21826653	12:21818171-21826632	8462	12:21809496-21826632	17137	paternal	A
FAM67	Mitochondrial metabolism disorder	45.7604	37.3388	2.07529	F	Y	N	Trio WES	GABRA2	NC_000004.12:g.46,262,110G>T	NM_001114175.3:c.875C>A	p.(Thr292Lys)	14 / 14	44	Deep-NGS	4:46261995-46262015	4:46262172-46262190	156	4:46262016-46261995	6425 [522-12800]	No evidence for parental mosaicism or a postzygotic mutation	Long-read Sequencing (ONT)	4:46251977-46251997	4:46262172-46262190	4:46251998-46262171	10174	4:46261995-46262015	4:46276967-46276986	4:46262016-46276966	14951	4:46251998-46276966	24969	paternal	A

## Sheet: Supplementary Data 2
Supplementary Data 2. Targeted deep-sequencing (Deep-NGS) data for the families enrolled in the PREGCARE study
Family ID	Gene name	Location of de novo mutation (GRCh38.p12)	REF base	ALT base	Sample type (see notes)	Replicate 1				Replicate 2				Replicate 3				Total REF count	Total ALT count	Total Sequencing Depth	VAF (from total of 3 replicates)	95%CI_LO	95%CI_UP	Corrected VAF	95%CI_LO of corrected VAF	95%CI_UP of corrected VAF		DNM category (see notes)
						REF count	ALT count	Depth	VAF	REF count	ALT count	Depth	VAF	REF count	ALT count	Depth	VAF
FAM01	KIF11	10:92632551	G	C	C1	NA	NA	NA	NA	NA	NA	NA	NA	NA	NA	NA	NA	NA	NA	NA	NA	NA	NA	NA	NA	NA		F
FAM01	KIF11	10:92632551	G	C	C2	NA	NA	NA	NA	NA	NA	NA	NA	NA	NA	NA	NA	NA	NA	NA	NA	NA	NA	NA	NA	NA		F
FAM01	KIF11	10:92632551	G	C	C7	16203	16576	32783	0.505628	26333	25789	52123	0.494772	21197	19685	40883	0.481496	63733	62050	125789	0.49331	0.490543	0.496077	0.493305	0.490542	0.496068		F
FAM01	KIF11	10:92632551	G	C	F1	NA	NA	NA	NA	NA	NA	NA	NA	NA	NA	NA	NA	NA	NA	NA	NA	NA	NA	NA	NA	NA		F
FAM01	KIF11	10:92632551	G	C	F2	NA	NA	NA	NA	NA	NA	NA	NA	NA	NA	NA	NA	NA	NA	NA	NA	NA	NA	NA	NA	NA		F
FAM01	KIF11	10:92632551	G	C	F3	40649	0	40653	0	54524	0	54528	0	35571	0	35573	0	130744	0	130754	0	0	2.82141e-05	0	0	1.03467e-05		F
FAM01	KIF11	10:92632551	G	C	F4	NA	NA	NA	NA	NA	NA	NA	NA	NA	NA	NA	NA	NA	NA	NA	NA	NA	NA	NA	NA	NA		F
FAM01	KIF11	10:92632551	G	C	F5	NA	NA	NA	NA	NA	NA	NA	NA	NA	NA	NA	NA	NA	NA	NA	NA	NA	NA	NA	NA	NA		F
FAM01	KIF11	10:92632551	G	C	F6	39233	28	39263	0.00071314	54431	10	54442	0.000183682	32698	7	32709	0.000214008	126362	45	126414	0.000355993	0.000259675	0.000476318	0.000346675	0.000251861	0.000461431		F
FAM01	KIF11	10:92632551	G	C	M1	18873	68	18942	0.00358991	23800	56	23858	0.00234722	28055	90	28147	0.0031975	70728	214	70947	0.00301655	0.0026264	0.00344818	0.00300716	0.00262115	0.00342896		F
FAM01	KIF11	10:92632551	G	C	M2	37226	428	37657	0.0113657	41616	427	42046	0.0101555	29208	312	29524	0.0105677	108050	1167	109227	0.0106851	0.0100838	0.0113127	0.0106758	0.0100774	0.0112972		F
FAM01	KIF11	10:92632551	G	C	M3	19039	113	19153	0.00589986	20501	139	20642	0.00673384	8296	37	8333	0.00444018	47836	289	48128	0.00600519	0.00533447	0.00673651	0.00599582	0.00533151	0.00671269		F
FAM01	KIF11	10:92632551	G	C	M4	2777	7	2784	0.00251437	32764	251	33016	0.00760237	27321	195	27517	0.00708653	62862	453	63317	0.0071547	0.00651298	0.0078422	0.00714534	0.00650854	0.007822		F
FAM01	KIF11	10:92632551	G	C	M5	15320	122	15448	0.00789746	14536	125	14661	0.00852602	18105	149	18258	0.00816081	47961	396	48367	0.00818909	0.00740514	0.00903292	0.00817974	0.00740226	0.0090093		F
FAM01	KIF11	10:92632551	G	C	Control1	38336	1	38339	2.60831e-05	42265	1	42266	2.36597e-05	38741	0	38745	0	119342	2	119350	1.67583e-05	2.02951e-06	6.05353e-05	NA	NA	NA		F
FAM01	KIF11	10:92632551	G	C	Control2	33816	0	33817	0	22192	0	22195	0	26809	0	26810	0	82817	0	82822	0	0	4.45415e-05	NA	NA	NA		F
FAM01	KIF11	10:92632551	G	C	Control3	36343	0	36345	0	44803	0	44804	0	34720	0	34722	0	115866	0	115871	0	0	3.1837e-05	NA	NA	NA		F
FAM02	RIT1	1:155904496	A	C	C1	3353	3272	6626	0.493812	6273	6532	12805	0.510113	1965	2160	4126	0.523509	11591	11964	23557	0.507918	0.501511	0.514322	0.507879	0.501494	0.514263		A
FAM02	RIT1	1:155904496	A	C	C2	17412	18266	35680	0.511939	19336	19356	38692	0.500258	22158	22553	44716	0.504361	58906	60175	119088	0.505328	0.502484	0.508172	0.50529	0.50245	0.50813		A
FAM02	RIT1	1:155904496	A	C	C7	14153	13383	27536	0.486018	13256	14163	27420	0.516521	10162	10110	20274	0.498668	37571	37656	75230	0.500565	0.496985	0.504145	0.500526	0.496953	0.504099		A
FAM02	RIT1	1:155904496	A	C	F1	18766	1	18769	5.32793e-05	25857	4	25863	0.000154661	18727	2	18731	0.000106775	63350	7	63363	0.000110485	4.44218e-05	0.000227628	3.54902e-05	0	0.000142262		A
FAM02	RIT1	1:155904496	A	C	F2	21923	3	21928	0.000136811	31297	4	31305	0.000127775	27076	1	27078	3.69303e-05	80296	8	80311	9.96214e-05	4.30104e-05	0.000196284	2.49272e-05	0	0.000115099		A
FAM02	RIT1	1:155904496	A	C	F3	32287	2	32289	6.19406e-05	25654	4	25658	0.000155897	36319	2	36321	5.50646e-05	94260	8	94268	8.48644e-05	3.66391e-05	0.00016721	1.06198e-05	0	8.87472e-05		A
FAM02	RIT1	1:155904496	A	C	F4	33882	4	33887	0.000118039	32340	1	32341	3.09205e-05	35667	2	35670	5.60695e-05	101889	7	101898	6.86975e-05	2.76204e-05	0.000141538	1.36029e-16	0	6.49942e-05		A
FAM02	RIT1	1:155904496	A	C	F5	6100	0	6100	0	3481	0	3482	0	1523	0	1523	0	11104	0	11105	0	0	0.000332157	0	0	0.00012182		A
FAM02	RIT1	1:155904496	A	C	F6	30899	3	30903	9.7078e-05	11823	2	11825	0.000169133	21619	1	21623	4.62471e-05	64341	6	64351	9.32444e-05	3.42198e-05	0.000202943	1.86959e-05	0	0.000118088		A
FAM02	RIT1	1:155904496	A	C	M1	8591	0	8591	0	14290	2	14292	0.000139938	17396	4	17400	0.000229885	40277	6	40283	0.000148946	5.46625e-05	0.000324165	7.32145e-05	0	0.00022849		A
FAM02	RIT1	1:155904496	A	C	M2	16095	0	16095	0	11975	1	11976	8.35003e-05	6848	0	6848	0	34918	1	34919	2.86377e-05	7.25044e-07	0.000159549	7.44438e-17	0	7.65613e-05		A
FAM02	RIT1	1:155904496	A	C	M3	18405	0	18408	0	23881	1	23884	4.1869e-05	27531	4	27536	0.000145264	69817	5	69828	7.16107e-05	2.32522e-05	0.000167107	1.41798e-16	0	8.42403e-05		A
FAM02	RIT1	1:155904496	A	C	M4	25761	2	25765	7.76247e-05	23813	0	23815	0	14719	0	14720	0	64293	2	64300	3.11066e-05	3.76718e-06	0.000112363	8.72427e-17	0	4.69402e-05		A
FAM02	RIT1	1:155904496	A	C	M5	26002	2	26008	7.68994e-05	32261	1	32262	3.09962e-05	26123	1	26127	3.82746e-05	84386	4	84397	4.7399e-05	1.29148e-05	0.000121356	7.7847e-17	0	4.96718e-05		A
FAM02	RIT1	1:155904496	A	C	Control1	31681	2	31688	6.31154e-05	44489	5	44497	0.000112367	32180	3	32185	9.32111e-05	108350	10	108370	9.2285e-05	4.42551e-05	0.000169709	NA	NA	NA		A
FAM02	RIT1	1:155904496	A	C	Control2	44186	2	44190	4.52591e-05	22353	2	22358	8.94534e-05	41908	4	41913	9.54358e-05	108447	8	108461	7.37633e-05	3.18463e-05	0.000145338	NA	NA	NA		A
FAM02	RIT1	1:155904496	A	C	Control3	5463	0	5463	0	16094	0	16095	0	5371	0	5372	0	26928	0	26930	0	0	0.000136981	NA	NA	NA		A
FAM03	KAT6B	10:75022007	G	delG	C1	NA	NA	NA	NA	NA	NA	NA	NA	NA	NA	NA	NA	NA	NA	NA	NA	NA	NA	NA	NA	NA		A/D/E
FAM03	KAT6B	10:75022007	G	delG	C2	NA	NA	NA	NA	NA	NA	NA	NA	NA	NA	NA	NA	NA	NA	NA	NA	NA	NA	NA	NA	NA		A/D/E
FAM03	KAT6B	10:75022007	G	delG	C7	35492	37112	72623	0.511023	25225	24412	49647	0.491711	33448	34956	68429	0.510836	94165	96480	190699	0.506071	0.503825	0.508318	0.506057	0.503813	0.508302		A/D/E
FAM03	KAT6B	10:75022007	G	delG	F1	14533	0	14539	0	33749	1	33755	2.96252e-05	37442	0	37449	0	85724	1	85743	1.16652e-05	2.95337e-07	6.49926e-05	8.43049e-17	0	3.32181e-05		A/D/E
FAM03	KAT6B	10:75022007	G	delG	F2	14929	0	14936	0	39251	0	39256	0	28480	0	28481	0	82660	0	82673	0	0	4.46261e-05	0	0	1.63654e-05		A/D/E
FAM03	KAT6B	10:75022007	G	delG	F3	32035	2	32043	6.24161e-05	27543	0	27547	0	28135	0	28142	0	87713	2	87732	2.28011e-05	2.76133e-06	8.2363e-05	1.17239e-16	0	4.70215e-05		A/D/E
FAM03	KAT6B	10:75022007	G	delG	F4	19328	0	19332	0	49288	1	49307	2.02811e-05	28131	1	28145	3.55303e-05	96747	2	96784	2.0672e-05	2.50349e-06	7.46725e-05	9.93809e-17	0	4.11225e-05		A/D/E
FAM03	KAT6B	10:75022007	G	delG	F5	1378	0	1378	0	2002	0	2002	0	66	0	66	0	3446	0	3446	0	0	0.00106991	0	0	0.000392486		A/D/E
FAM03	KAT6B	10:75022007	G	delG	F6	28515	0	28526	0	25098	1	25103	3.98359e-05	37166	3	37173	8.07037e-05	90779	4	90802	4.40611e-05	1.20053e-05	0.00011281	1.79567e-05	0	7.77317e-05		A/D/E
FAM03	KAT6B	10:75022007	G	delG	M1	14764	0	14767	0	24204	2	24210	8.26105e-05	24212	0	24217	0	63180	2	63194	3.16546e-05	3.83354e-06	0.000114343	6.18886e-06	0	7.31004e-05		A/D/E
FAM03	KAT6B	10:75022007	G	delG	M2	25845	1	25847	3.86892e-05	33212	0	33218	0	29814	0	29820	0	88871	1	88885	1.12521e-05	2.84879e-07	6.26913e-05	7.86987e-17	0	3.18061e-05		A/D/E
FAM03	KAT6B	10:75022007	G	delG	M3	27583	1	27588	3.62476e-05	29387	1	29394	3.40205e-05	24369	1	24375	4.10256e-05	81339	3	81357	3.68813e-05	7.60588e-06	0.000107779	1.1105e-05	0	7.11266e-05		A/D/E
FAM03	KAT6B	10:75022007	G	delG	M4	23759	1	23766	4.20769e-05	17929	0	17931	0	22896	0	22900	0	64584	1	64597	1.54835e-05	3.92007e-07	8.62653e-05	1.29874e-16	0	4.69148e-05		A/D/E
FAM03	KAT6B	10:75022007	G	delG	M5	15481	0	15482	0	25490	0	25490	0	24443	0	24446	0	65414	0	65418	0	0	5.63912e-05	0	0	2.06799e-05		A/D/E
FAM03	KAT6B	10:75022007	G	delG	Control1	33722	0	33729	0	19965	0	19970	0	21520	0	21522	0	75207	0	75221	0	0	4.90485e-05	NA	NA	NA		A/D/E
FAM03	KAT6B	10:75022007	G	delG	Control2	43791	1	43800	2.28311e-05	17522	1	17526	5.70581e-05	28388	0	28396	0	89701	2	89722	2.22958e-05	2.70014e-06	8.05377e-05	NA	NA	NA		A/D/E
FAM03	KAT6B	10:75022007	G	delG	Control3	35533	2	35539	5.62762e-05	38076	0	38099	0	43432	3	43441	6.90592e-05	117041	5	117079	4.27182e-05	1.38706e-05	9.96873e-05	NA	NA	NA		A/D/E
FAM04	TSC2	16:2086242	A	G	C1	11457	12411	23868	0.519985	12949	16076	29025	0.553867	9583	10451	20034	0.521663	33989	38938	72927	0.533931	0.530303	0.537557	0.53389	0.530268	0.537509		A
FAM04	TSC2	16:2086242	A	G	C2	13296	17960	31265	0.574444	14345	18310	32656	0.560693	10393	11080	21473	0.515997	38034	47350	85394	0.554554	0.551212	0.557891	0.554514	0.551178	0.557846		A
FAM04	TSC2	16:2086242	A	G	C7	9955	12357	22313	0.553803	6264	7460	13724	0.543573	15122	16164	31286	0.516653	31341	35981	67323	0.534461	0.530684	0.538235	0.53442	0.53065	0.538187		A
FAM04	TSC2	16:2086242	A	G	F1	20681	1	20685	4.83442e-05	20717	2	20719	9.65298e-05	15059	2	15061	0.000132793	56457	5	56465	8.85551e-05	2.87542e-05	0.000206646	5.73058e-06	0	0.000112961		A
FAM04	TSC2	16:2086242	A	G	F2	18814	3	18818	0.000159422	14273	1	14274	7.00574e-05	19104	1	19106	5.23396e-05	52191	5	52198	9.57928e-05	3.11044e-05	0.000223534	1.26114e-05	0	0.000127785		A
FAM04	TSC2	16:2086242	A	G	F3	17948	1	17952	5.57041e-05	15333	3	15338	0.000195593	24226	6	24234	0.000247586	57507	10	57524	0.000173862	8.33765e-05	0.000319714	8.85652e-05	0	0.000224809		A
FAM04	TSC2	16:2086242	A	G	F4	12138	7	12147	0.000576274	21828	6	21835	0.000274788	16368	0	16368	0	50334	13	50350	0.000258208	0.000137492	0.000441503	0.000171861	4.49932e-05	0.000343109		A
FAM04	TSC2	16:2086242	A	G	F5	19292	2	19296	0.000103648	27829	18	27849	0.000646343	19554	5	19561	0.000255611	66675	25	66706	0.000374813	0.000242573	0.000553248	0.000287868	0.000149928	0.00045935		A
FAM04	TSC2	16:2086242	A	G	F6	14100	0	14100	0	18740	1	18742	5.33561e-05	17344	3	17347	0.000172941	50184	4	50189	7.97003e-05	2.17161e-05	0.000204052	8.38016e-17	0	0.000107781		A
FAM04	TSC2	16:2086242	A	G	M1	21072	4	21078	0.000189771	18731	1	18733	5.33817e-05	20032	6	20040	0.000299401	59835	11	59851	0.000183805	9.17583e-05	0.000328854	9.8366e-05	0	0.000234613		A
FAM04	TSC2	16:2086242	A	G	M2	18218	2	18223	0.000109751	22476	2	22479	8.89719e-05	15050	7	15058	0.000464869	55744	11	55760	0.000197292	9.84913e-05	0.000352982	0.000111631	3.75485e-06	0.000257179		A
FAM04	TSC2	16:2086242	A	G	M3	19577	4	19582	0.000204269	16551	21	16572	0.0012672	25393	2	25395	7.87557e-05	61521	27	61549	0.000438682	0.000289113	0.000638196	0.00035147	0.00019768	0.000542699		A
FAM04	TSC2	16:2086242	A	G	M4	14938	3	14941	0.00020079	14073	1	14075	7.1048e-05	12922	0	12923	0	41933	4	41939	9.53812e-05	2.59887e-05	0.000244195	1.21887e-05	0	0.000142533		A
FAM04	TSC2	16:2086242	A	G	M5	14888	5	14894	0.000335706	16613	2	16617	0.000120359	18993	2	18996	0.000105285	50494	9	50507	0.000178207	8.14908e-05	0.000338266	9.27896e-05	0	0.000240527		A
FAM04	TSC2	16:2086242	A	G	Control1	15384	0	15385	0	16421	1	16423	6.08902e-05	19525	2	19527	0.000102422	51330	3	51335	5.84419e-05	1.20523e-05	0.000170783	NA	NA	NA		A
FAM04	TSC2	16:2086242	A	G	Control2	20097	4	20102	0.000198985	16577	1	16579	6.03173e-05	22759	2	22761	8.78696e-05	59433	7	59442	0.000117766	4.73492e-05	0.000242627	NA	NA	NA		A
FAM04	TSC2	16:2086242	A	G	Control3	16899	2	16902	0.000118329	18186	1	18187	5.49843e-05	11713	0	11713	0	46798	3	46802	6.41012e-05	1.32194e-05	0.000187319	NA	NA	NA		A
FAM05	CHD7	8:60861022	A	G	C1	16502	15933	32436	0.491213	23163	22916	46082	0.497287	18549	17876	36427	0.490735	58214	56725	114945	0.493523	0.490628	0.496417	0.493507	0.490616	0.496397		A
FAM05	CHD7	8:60861022	A	G	C2	19140	18804	37950	0.495494	14938	14518	29459	0.492821	16696	15735	32431	0.485184	50774	49057	99840	0.4914	0.488295	0.494507	0.491385	0.488284	0.494486		A
FAM05	CHD7	8:60861022	A	G	C7	21559	20473	42036	0.487035	25212	23105	48321	0.478156	16381	16789	33171	0.506135	63152	60367	123528	0.488726	0.485935	0.491518	0.48871	0.485923	0.491498		A
FAM05	CHD7	8:60861022	A	G	F1	26960	1	26962	3.70892e-05	33462	2	33465	5.97639e-05	23285	1	23286	4.29443e-05	83707	4	83713	4.77834e-05	1.30195e-05	0.00012234	1.86857e-05	0	8.34285e-05		A
FAM05	CHD7	8:60861022	A	G	F2	23049	2	23053	8.67566e-05	19120	1	19123	5.22931e-05	37117	2	37121	5.38779e-05	79286	5	79297	6.30589e-05	2.04753e-05	0.000147152	3.34855e-05	0	0.00010744		A
FAM05	CHD7	8:60861022	A	G	F3	24523	1	24525	4.07747e-05	26880	5	26886	0.00018597	21932	2	21937	9.11702e-05	73335	8	73348	0.000109077	4.70926e-05	0.000214913	7.88137e-05	1.54376e-05	0.000174141		A
FAM05	CHD7	8:60861022	A	G	F4	22701	1	22703	4.4047e-05	21730	0	21732	0	40472	2	40475	4.94132e-05	84903	3	84910	3.53332e-05	7.28661e-06	0.000103255	6.86055e-06	0	6.46037e-05		A
FAM05	CHD7	8:60861022	A	G	F5	23939	8	23949	0.000334043	28636	6	28644	0.000209468	32205	7	32213	0.000217304	84780	21	84806	0.000247639	0.000153299	0.000378517	0.000216808	0.000122783	0.000339607		A
FAM05	CHD7	8:60861022	A	G	F6	29426	0	29426	0	36765	1	36768	2.71976e-05	27531	2	27535	7.26348e-05	93722	3	93729	3.20085e-05	6.60098e-06	9.35396e-05	3.77699e-06	0	5.63573e-05		A
FAM05	CHD7	8:60861022	A	G	M1	22957	25	22983	0.00108776	29588	1	29590	3.37952e-05	22144	0	22147	0	74689	26	74720	0.000347989	0.00022733	0.000509843	0.000317006	0.00019777	0.000469481		A
FAM05	CHD7	8:60861022	A	G	M2	30661	0	30662	0	29156	2	29162	6.85824e-05	30529	2	30536	6.54965e-05	90346	4	90360	4.42723e-05	1.20628e-05	0.000113351	1.53321e-05	0	7.55309e-05		A
FAM05	CHD7	8:60861022	A	G	M3	21485	1	21487	4.65398e-05	24236	1	24240	4.12541e-05	22330	0	22330	0	68051	2	68057	2.93889e-05	3.55915e-06	0.000106159	1.35917e-06	0	6.36968e-05		A
FAM05	CHD7	8:60861022	A	G	M4	27072	0	27073	0	26795	4	26801	0.000149248	30983	1	30986	3.22726e-05	84850	5	84860	5.8924e-05	1.91327e-05	0.000137504	2.94682e-05	0	9.87572e-05		A
FAM05	CHD7	8:60861022	A	G	M5	NA	NA	NA	NA	NA	NA	NA	NA	NA	NA	NA	NA	NA	NA	NA	NA	NA	NA	NA	NA	NA		A
FAM05	CHD7	8:60861022	A	G	Control1	44631	0	44631	0	26361	1	26363	3.7932e-05	33021	1	33024	3.0281e-05	104013	2	104018	1.9228e-05	2.32861e-06	6.94564e-05	NA	NA	NA		A
FAM05	CHD7	8:60861022	A	G	Control2	31339	0	31341	0	33078	2	33080	6.04595e-05	32203	1	32204	3.1052e-05	96620	3	96625	3.10485e-05	6.40299e-06	9.07342e-05	NA	NA	NA		A
FAM05	CHD7	8:60861022	A	G	Control3	26364	1	26368	3.79248e-05	29482	2	29487	6.78265e-05	30408	0	30411	0	86254	3	86266	3.47798e-05	7.17249e-06	0.000101638	NA	NA	NA		A
FAM06	TUBA1A	12:49185098	T	C	C1	8996	9040	18038	0.501164	7338	6933	14274	0.485708	7573	6773	14348	0.472052	23907	22746	46660	0.487557	0.483012	0.492104	0.487524	0.482989	0.49206		A
FAM06	TUBA1A	12:49185098	T	C	C2	3521	3327	6848	0.485835	2274	2178	4453	0.489108	3592	3526	7118	0.495364	9387	9031	18419	0.490336	0.483091	0.497583	0.490303	0.483084	0.497524		A
FAM06	TUBA1A	12:49185098	T	C	C7	10515	10731	21248	0.505036	13846	12927	26776	0.482783	8861	8217	17079	0.481117	33222	31875	65103	0.489654	0.485807	0.493502	0.489621	0.485781	0.493462		A
FAM06	TUBA1A	12:49185098	T	C	F1	3963	1	3964	0.00025227	15615	3	15618	0.000192086	12801	1	12804	7.81006e-05	32379	5	32386	0.000154397	5.01342e-05	0.000360275	9.24359e-05	0	0.000272301		A
FAM06	TUBA1A	12:49185098	T	C	F2	8851	0	8852	0	16256	2	16259	0.000123009	11389	1	11390	8.77963e-05	36496	3	36501	8.2194e-05	1.69507e-05	0.000240187	2.22929e-05	0	0.000155729		A
FAM06	TUBA1A	12:49185098	T	C	F3	19316	0	19316	0	5677	1	5678	0.000176118	3521	0	3521	0	28514	1	28515	3.50693e-05	8.87876e-07	0.000195378	1.07785e-16	0	0.000104915		A
FAM06	TUBA1A	12:49185098	T	C	F4	8769	3	8772	0.000341997	19760	3	19764	0.000151791	16554	3	16557	0.000181192	45083	9	45093	0.000199592	9.12701e-05	0.000378854	0.000137146	2.44173e-05	0.000300479		A
FAM06	TUBA1A	12:49185098	T	C	F5	319	0	319	0	1038	0	1038	0	1226	0	1226	0	2583	0	2583	0	0	0.00142712	0	0	0.000523584		A
FAM06	TUBA1A	12:49185098	T	C	F6	20930	6	20938	0.00028656	13384	4	13389	0.000298753	11420	1	11422	8.75503e-05	45734	11	45749	0.000240463	0.000120044	0.000430215	0.000177668	5.39655e-05	0.000352099		A
FAM06	TUBA1A	12:49185098	T	C	M1	9996	0	9996	0	5907	1	5909	0.000169233	12708	2	12710	0.000157356	28611	3	28615	0.000104844	2.16218e-05	0.000306367	4.39816e-05	0	0.000213016		A
FAM06	TUBA1A	12:49185098	T	C	M2	14494	1	14497	6.89798e-05	9409	0	9411	0	16523	1	16524	6.0518e-05	40426	2	40432	4.94707e-05	5.99118e-06	0.000178694	8.44845e-17	0	9.83866e-05		A
FAM06	TUBA1A	12:49185098	T	C	M3	11542	2	11546	0.00017322	4542	1	4543	0.000220119	4594	1	4595	0.000217628	20678	4	20684	0.000193405	5.26988e-05	0.000495119	0.000130843	0	0.000388308		A
FAM06	TUBA1A	12:49185098	T	C	M4	4876	0	4876	0	13492	2	13494	0.000148214	19417	1	19419	5.1496e-05	37785	3	37789	7.93903e-05	1.63725e-05	0.000231994	1.96387e-05	0	0.000148687		A
FAM06	TUBA1A	12:49185098	T	C	M5	8552	1	8553	0.000116918	9812	0	9813	0	7765	0	7766	0	26129	1	26132	3.82702e-05	9.68917e-07	0.000213209	1.22614e-16	0	0.000116926		A
FAM06	TUBA1A	12:49185098	T	C	Control1	20677	2	20680	9.67118e-05	14929	2	14932	0.000133941	18626	1	18628	5.36826e-05	54232	5	54240	9.2188e-05	2.99338e-05	0.000215123	NA	NA	NA		A
FAM06	TUBA1A	12:49185098	T	C	Control2	16618	1	16621	6.01649e-05	20157	0	20157	0	15555	1	15558	6.42756e-05	52330	2	52336	3.82175e-05	4.62835e-06	0.000138048	NA	NA	NA		A
FAM06	TUBA1A	12:49185098	T	C	Control3	16102	1	16103	6.21002e-05	18649	1	18652	5.36136e-05	13007	0	13007	0	47758	2	47762	4.1876e-05	5.07142e-06	0.000151262	NA	NA	NA		A
FAM07	COL1A2	7:94417833	T	G	C1	NA	NA	NA	NA	NA	NA	NA	NA	NA	NA	NA	NA	NA	NA	NA	NA	NA	NA	NA	NA	NA		A
FAM07	COL1A2	7:94417833	T	G	C2	NA	NA	NA	NA	NA	NA	NA	NA	NA	NA	NA	NA	NA	NA	NA	NA	NA	NA	NA	NA	NA		A
FAM07	COL1A2	7:94417833	T	G	C7	15596	15080	30678	0.491557	18869	17423	36294	0.480052	15450	14783	30236	0.48892	49915	47286	97208	0.486476	0.48333	0.489624	0.48646	0.483318	0.489602		A
FAM07	COL1A2	7:94417833	T	G	F1	24907	0	24911	0	25329	0	25334	0	25066	0	25067	0	75302	0	75312	0	0	4.89866e-05	0	0	1.79645e-05		A
FAM07	COL1A2	7:94417833	T	G	F2	21926	0	21926	0	26064	0	26066	0	24067	0	24067	0	72057	0	72059	0	0	5.11926e-05	0	0	1.87735e-05		A
FAM07	COL1A2	7:94417833	T	G	F3	34087	1	34093	2.93315e-05	21101	4	21105	0.000189529	28306	1	28307	3.5327e-05	83494	6	83505	7.18563e-05	2.63704e-05	0.000156394	4.10758e-05	0	0.000116333		A
FAM07	COL1A2	7:94417833	T	G	F4	35648	1	35655	2.80466e-05	24839	2	24843	8.05056e-05	26872	0	26877	0	87359	3	87375	3.43399e-05	7.08176e-06	0.000100352	4.85827e-06	0	6.10237e-05		A
FAM07	COL1A2	7:94417833	T	G	F5	12280	1	12284	8.14067e-05	10372	2	10375	0.000192771	4508	0	4508	0	27160	3	27167	0.000110444	2.27769e-05	0.000322731	7.90823e-05	0	0.000255531		A
FAM07	COL1A2	7:94417833	T	G	F6	28951	1	28954	3.45375e-05	37014	1	37016	2.70153e-05	39686	5	39700	0.000125945	105651	7	105670	6.62515e-05	2.66369e-05	0.000136499	3.56227e-05	0	9.93234e-05		A
FAM07	COL1A2	7:94417833	T	G	M1	22844	1	22846	4.37713e-05	20177	1	20179	4.95565e-05	11617	0	11618	0	54638	2	54643	3.66032e-05	4.43285e-06	0.000132217	6.94334e-06	0	8.41437e-05		A
FAM07	COL1A2	7:94417833	T	G	M2	25750	1	25753	3.88304e-05	26047	2	26051	7.67725e-05	23016	1	23018	4.34443e-05	74813	4	74822	5.34638e-05	1.45673e-05	0.000136883	2.31037e-05	0	9.51864e-05		A
FAM07	COL1A2	7:94417833	T	G	M3	28365	0	28368	0	19964	1	19967	5.00826e-05	22286	0	22288	0	70615	1	70623	1.41611e-05	3.58528e-07	7.8898e-05	1.18179e-16	0	4.03667e-05		A
FAM07	COL1A2	7:94417833	T	G	M4	28527	3	28532	0.000105145	26095	1	26098	3.83171e-05	32411	1	32414	3.08509e-05	87033	5	87044	5.74462e-05	1.86529e-05	0.000134055	2.69937e-05	0	9.45747e-05		A
FAM07	COL1A2	7:94417833	T	G	M5	30393	0	30397	0	25002	0	25002	0	28631	1	28638	3.49186e-05	84026	1	84037	1.19009e-05	3.01306e-07	6.6306e-05	8.75042e-17	0	3.27012e-05		A
FAM07	COL1A2	7:94417833	T	G	Control1	39998	0	39999	0	20771	0	20773	0	32008	2	32013	6.24746e-05	92777	2	92785	2.15566e-05	2.61062e-06	7.78677e-05	NA	NA	NA		A
FAM07	COL1A2	7:94417833	T	G	Control2	50644	0	50646	0	19474	0	19476	0	39355	1	39359	2.54071e-05	109473	1	109481	9.13459e-06	2.31268e-07	5.08936e-05	NA	NA	NA		A
FAM07	COL1A2	7:94417833	T	G	Control3	44265	3	44272	6.77629e-05	32128	2	32134	6.22394e-05	30773	1	30777	3.24918e-05	107166	6	107183	5.59848e-05	2.05457e-05	0.000121851	NA	NA	NA		A
FAM08	CHD7	8:60824021	G	C	C1	12447	10636	23085	0.460732	16485	19228	35717	0.538343	21383	20886	42271	0.494098	50315	50750	101073	0.502152	0.499065	0.50524	0.502142	0.499059	0.505225		A
FAM08	CHD7	8:60824021	G	C	C2	NA	NA	NA	NA	NA	NA	NA	NA	NA	NA	NA	NA	NA	NA	NA	NA	NA	NA	NA	NA	NA		A
FAM08	CHD7	8:60824021	G	C	C7	20132	20449	40584	0.503869	12250	13164	25416	0.517941	18659	18333	36993	0.49558	51041	51946	102993	0.504394	0.501335	0.507452	0.504384	0.50133	0.507437		A
FAM08	CHD7	8:60824021	G	C	F1	NA	NA	NA	NA	NA	NA	NA	NA	NA	NA	NA	NA	NA	NA	NA	NA	NA	NA	NA	NA	NA		A
FAM08	CHD7	8:60824021	G	C	F2	43	0	43	0	23231	0	23232	0	31058	0	31058	0	54332	0	54333	0	0	6.78928e-05	0	0	2.48979e-05		A
FAM08	CHD7	8:60824021	G	C	F3	30987	0	30990	0	20689	1	20691	4.83302e-05	18605	0	18605	0	70281	1	70286	1.42284e-05	3.60232e-07	7.9273e-05	1.19092e-16	0	4.71584e-05		A
FAM08	CHD7	8:60824021	G	C	F4	35951	0	35953	0	22052	0	22054	0	30431	0	30433	0	88434	0	88440	0	0	4.17125e-05	0	0	1.52968e-05		A
FAM08	CHD7	8:60824021	G	C	F5	NA	NA	NA	NA	44656	0	44658	0	3642	0	3642	0	48298	0	48300	0	0	7.63746e-05	0	0	2.80085e-05		A
FAM08	CHD7	8:60824021	G	C	F6	22670	0	22671	0	23613	0	23617	0	25314	1	25316	3.95007e-05	71597	1	71604	1.39669e-05	3.5361e-07	7.78159e-05	1.15543e-16	0	4.60957e-05		A
FAM08	CHD7	8:60824021	G	C	M1	23578	1	23582	4.24052e-05	18709	2	18713	0.000106878	27032	0	27033	0	69319	3	69328	4.32763e-05	8.9247e-06	0.000126466	2.51642e-05	0	9.49284e-05		A
FAM08	CHD7	8:60824021	G	C	M2	2041	0	2041	0	22122	0	22125	0	22262	0	22263	0	46425	0	46429	0	0	7.94557e-05	0	0	2.91384e-05		A
FAM08	CHD7	8:60824021	G	C	M3	15931	1	15932	6.27668e-05	23118	0	23119	0	19722	0	19724	0	58771	1	58775	1.70149e-05	4.3078e-07	9.47973e-05	8.71305e-07	0	5.87721e-05		A
FAM08	CHD7	8:60824021	G	C	M4	9068	1	9070	0.000110254	34643	1	34644	2.8865e-05	11672	0	11672	0	55383	2	55386	3.61109e-05	4.37322e-06	0.000130439	1.82478e-05	0	9.41791e-05		A
FAM08	CHD7	8:60824021	G	C	M5	NA	NA	NA	NA	NA	NA	NA	NA	NA	NA	NA	NA	NA	NA	NA	NA	NA	NA	NA	NA	NA		A
FAM08	CHD7	8:60824021	G	C	Control1	34412	0	34413	0	0	0	0	NA	43416	0	43418	0	77828	0	77831	0	0	4.73967e-05	NA	NA	NA		A
FAM08	CHD7	8:60824021	G	C	Control2	28194	1	28197	3.54648e-05	25703	1	25704	3.89045e-05	23233	1	23236	4.30367e-05	77130	3	77137	3.88939e-05	8.02092e-06	0.00011366	NA	NA	NA		A
FAM08	CHD7	8:60824021	G	C	Control3	18827	0	18829	0	35559	1	35562	2.81199e-05	41599	0	41601	0	95985	1	95992	1.04182e-05	2.63766e-07	5.8045e-05	NA	NA	NA		A
FAM09	KAT6B	10:75029028	T	C	C1	14381	13708	28092	0.487968	134	160	294	0.544218	417	427	844	0.505924	14932	14295	29230	0.489103	0.483356	0.494851	0.48909	0.48336	0.494822		D/E
FAM09	KAT6B	10:75029028	T	C	C2	14182	17567	31750	0.553291	20536	20176	40713	0.495567	14378	18181	32562	0.55835	49096	55924	105025	0.532508	0.529485	0.53553	0.532497	0.529478	0.535514		D/E
FAM09	KAT6B	10:75029028	T	C	C7	NA	NA	NA	NA	NA	NA	NA	NA	NA	NA	NA	NA	NA	NA	NA	NA	NA	NA	NA	NA	NA		D/E
FAM09	KAT6B	10:75029028	T	C	F1	24697	0	24701	0	37722	1	37726	2.65069e-05	31861	0	31864	0	94280	1	94291	1.06066e-05	2.68536e-07	5.90947e-05	1.43952e-16	0	3.04838e-05		D/E
FAM09	KAT6B	10:75029028	T	C	F2	41430	1	41435	2.41342e-05	32790	0	32792	0	47156	0	47162	0	121376	1	121389	8.23879e-06	2.08588e-07	4.59028e-05	1.06908e-16	0	2.24817e-05		D/E
FAM09	KAT6B	10:75029028	T	C	F3	50149	1	50155	1.99382e-05	38788	0	38795	0	38161	0	38164	0	127098	1	127114	7.86788e-06	1.99198e-07	4.38362e-05	9.8763e-17	0	2.12821e-05		D/E
FAM09	KAT6B	10:75029028	T	C	F4	40809	1	40813	2.4502e-05	37757	2	37762	5.29633e-05	42634	3	42642	7.03532e-05	121200	6	121217	4.95025e-05	1.81668e-05	0.000107743	2.69511e-05	0	7.90456e-05		D/E
FAM09	KAT6B	10:75029028	T	C	F5	22450	1	22451	4.45414e-05	25816	0	25817	0	26161	0	26162	0	74427	1	74430	1.34358e-05	3.40165e-07	7.48572e-05	1.08335e-16	0	4.07513e-05		D/E
FAM09	KAT6B	10:75029028	T	C	F6	40857	0	40860	0	36990	0	36995	0	31162	2	31166	6.41725e-05	109009	2	109021	1.83468e-05	2.22189e-06	6.62733e-05	7.98767e-17	0	3.68449e-05		D/E
FAM09	KAT6B	10:75029028	T	C	M1	30200	0	30206	0	21439	0	21442	0	19542	0	19544	0	71181	0	71192	0	0	5.18226e-05	0	0	1.90045e-05		D/E
FAM09	KAT6B	10:75029028	T	C	M2	29536	1	29539	3.38535e-05	50257	0	50263	0	30962	1	30964	3.22956e-05	110755	2	110766	1.80575e-05	2.18686e-06	6.52285e-05	7.74507e-17	0	3.60479e-05		D/E
FAM09	KAT6B	10:75029028	T	C	M3	25544	1	25549	3.91405e-05	23484	0	23487	0	41072	1	41079	2.43433e-05	90100	2	90115	2.21971e-05	2.68818e-06	8.01811e-05	8.53407e-07	0	4.79496e-05		D/E
FAM09	KAT6B	10:75029028	T	C	M4	26304	6	26311	0.000228042	36094	12	36110	0.000332318	32359	9	32371	0.000278027	94757	27	94792	0.000284858	0.000187731	0.000414427	0.000261223	0.000165372	0.000383356		D/E
FAM09	KAT6B	10:75029028	T	C	M5	38032	1	38034	2.62923e-05	27850	0	27851	0	22552	0	22554	0	88434	1	88439	1.13077e-05	2.86287e-07	6.30011e-05	7.94534e-17	0	3.29607e-05		D/E
FAM09	KAT6B	10:75029028	T	C	Control1	42461	0	42467	0	39550	0	39552	0	37453	1	37457	2.66973e-05	119464	1	119476	8.37065e-06	2.11927e-07	4.66374e-05	NA	NA	NA		D/E
FAM09	KAT6B	10:75029028	T	C	Control2	50983	1	50992	1.96109e-05	50734	0	50735	0	41285	2	41290	4.84379e-05	143002	3	143017	2.09783e-05	4.32625e-06	6.13062e-05	NA	NA	NA		D/E
FAM09	KAT6B	10:75029028	T	C	Control3	38108	3	38112	7.87154e-05	37176	0	37180	0	38677	1	38683	2.58511e-05	113961	4	113975	3.50985e-05	9.56324e-06	8.98636e-05	NA	NA	NA		D/E
FAM10	RAF1	3:12604200	G	A	C1	8497	8983	17480	0.513902	10800	11456	22258	0.514691	13808	14484	28292	0.511947	33105	34923	68030	0.513362	0.509598	0.517125	0.513295	0.509538	0.517051		A
FAM10	RAF1	3:12604200	G	A	C2	8483	8562	17047	0.502258	5671	6067	11738	0.516868	6961	7235	14200	0.509507	21115	21864	42985	0.508714	0.503975	0.513451	0.508645	0.503918	0.513372		A
FAM10	RAF1	3:12604200	G	A	C7	20466	21557	42023	0.512981	20408	21598	42008	0.51414	20955	22561	43517	0.518441	61829	65716	127548	0.515238	0.512491	0.517984	0.515171	0.512427	0.517913		A
FAM10	RAF1	3:12604200	G	A	F1	11507	2	11509	0.000173777	18991	1	18996	5.26427e-05	17561	1	17563	5.69379e-05	48059	4	48068	8.32241e-05	2.26762e-05	0.000213073	9.07791e-17	0	8.32711e-05		A
FAM10	RAF1	3:12604200	G	A	F2	15355	2	15358	0.000130225	15977	0	15979	0	28499	2	28501	7.0173e-05	59831	4	59838	6.68505e-05	1.82148e-05	0.000171155	1.32372e-16	0	5.96293e-05		A
FAM10	RAF1	3:12604200	G	A	F3	30796	3	30799	9.74058e-05	19295	4	19302	0.000207232	18504	2	18506	0.000108073	68595	9	68607	0.000131188	5.99891e-05	0.00024902	8.65304e-17	0	0.000110487		A
FAM10	RAF1	3:12604200	G	A	F4	28694	1	28696	3.48481e-05	27691	3	27694	0.000108327	29013	2	29015	6.89299e-05	85398	6	85405	7.02543e-05	2.57825e-05	0.000152908	1.1706e-06	0	4.77425e-05		A
FAM10	RAF1	3:12604200	G	A	F5	22015	3	22018	0.000136252	28493	2	28496	7.01853e-05	31339	2	31343	6.38101e-05	81847	7	81857	8.55181e-05	3.43834e-05	0.000176192	9.53215e-17	0	5.79229e-05		A
FAM10	RAF1	3:12604200	G	A	F6	19686	4	19690	0.000203149	18773	5	18778	0.000266269	15644	11	15657	0.000702561	54103	20	54125	0.000369529	0.000225732	0.00057065	0.000232924	8.34153e-05	0.000424491		A
FAM10	RAF1	3:12604200	G	A	M1	23448	2	23450	8.52878e-05	19942	5	19953	0.000250589	29764	5	29769	0.00016796	73154	12	73172	0.000164011	8.47495e-05	0.000286476	2.9464e-05	0	0.000148237		A
FAM10	RAF1	3:12604200	G	A	M2	19420	1	19421	5.14907e-05	13859	1	13861	7.21449e-05	23048	0	23050	0	56327	2	56332	3.55057e-05	4.29993e-06	0.000128253	1.10048e-16	0	4.63545e-05		A
FAM10	RAF1	3:12604200	G	A	M3	14581	4	14585	0.000274254	12706	4	12710	0.000314713	17734	4	17738	0.000225505	45021	12	45033	0.000266471	0.000137697	0.000465425	0.000130489	0	0.000315892		A
FAM10	RAF1	3:12604200	G	A	M4	24255	5	24263	0.000206075	14253	7	14264	0.000490746	23038	5	23044	0.000216976	61546	17	61571	0.00027614	0.00016087	0.00044209	0.000140149	1.59985e-05	0.000299045		A
FAM10	RAF1	3:12604200	G	A	M5	29472	3	29477	0.000101774	36717	5	36723	0.000136154	26276	3	26285	0.000114134	92465	11	92485	0.00011895	5.93808e-05	0.000212824	1.45569e-16	0	8.14506e-05		A
FAM10	RAF1	3:12604200	G	A	Control1	22135	2	22138	9.03424e-05	33257	3	33260	9.01984e-05	18408	3	18413	0.000162928	73800	8	73811	0.000108389	4.67959e-05	0.000213559	NA	NA	NA		A
FAM10	RAF1	3:12604200	G	A	Control2	15682	2	15684	0.000127518	22312	5	22319	0.000224024	19723	3	19728	0.000152068	57717	10	57731	0.000173229	8.30731e-05	0.000318551	NA	NA	NA		A
FAM10	RAF1	3:12604200	G	A	Control3	18049	4	18053	0.00022157	24185	2	24187	8.2689e-05	35380	4	35385	0.000113042	77614	10	77625	0.000128826	6.17788e-05	0.000236903	NA	NA	NA		A
FAM11	NSD1	5:177210200_177210201	AA	delAA	C1	101	79	180	0.438889	830	795	1626	0.48893	358	303	661	0.458396	1289	1177	2467	0.477291	0.457411	0.497225	0.477271	0.457588	0.497002		A
FAM11	NSD1	5:177210200_177210201	AA	delAA	C2	4556	4083	8641	0.472515	6173	6264	12440	0.503537	6987	6118	13108	0.466738	17716	16465	34189	0.4817	0.47639	0.487013	0.481681	0.476385	0.486979		A
FAM11	NSD1	5:177210200_177210201	AA	delAA	C7	7017	6053	13073	0.463015	6126	5198	11326	0.458944	5590	4928	10520	0.468441	18733	16179	34919	0.463422	0.45818	0.46867	0.463402	0.458174	0.468636		A
FAM11	NSD1	5:177210200_177210201	AA	delAA	F1	22966	2	22972	8.70625e-05	24477	0	24481	0	5544	0	5544	0	52987	2	52997	3.77437e-05	4.57097e-06	0.000136336	5.41628e-06	0	8.56898e-05		A
FAM11	NSD1	5:177210200_177210201	AA	delAA	F2	NA	NA	NA	NA	NA	NA	NA	NA	NA	NA	NA	NA	NA	NA	NA	NA	NA	NA	NA	NA	NA		A
FAM11	NSD1	5:177210200_177210201	AA	delAA	F3	16385	0	16387	0	13710	2	13715	0.000145826	12551	1	12552	7.96686e-05	42646	3	42654	7.03416e-05	1.45064e-05	0.000205554	3.58323e-05	0	0.000149439		A
FAM11	NSD1	5:177210200_177210201	AA	delAA	F4	NA	NA	NA	NA	39029	0	39039	0	27738	6	27749	0.000216224	66767	6	66788	8.98567e-05	3.29765e-05	0.00019557	5.48928e-05	0	0.000149582		A
FAM11	NSD1	5:177210200_177210201	AA	delAA	F5	12576	1	12577	7.95102e-05	11429	0	11432	0	NA	NA	NA	NA	24005	1	24009	4.16563e-05	1.05464e-06	0.000232072	8.79603e-06	0	0.000150545		A
FAM11	NSD1	5:177210200_177210201	AA	delAA	F6	25957	0	25962	0	10270	0	10270	0	32696	0	32699	0	68923	0	68931	0	0	5.35203e-05	0	0	1.96271e-05		A
FAM11	NSD1	5:177210200_177210201	AA	delAA	M1	13855	0	13856	0	28416	1	28423	3.51828e-05	28163	0	28169	0	70434	1	70448	1.41975e-05	3.59449e-07	7.91008e-05	1.18673e-16	0	4.05461e-05		A
FAM11	NSD1	5:177210200_177210201	AA	delAA	M2	3592	0	3593	0	28198	0	28201	0	27698	0	27706	0	59488	0	59500	0	0	6.20086e-05	0	0	2.274e-05		A
FAM11	NSD1	5:177210200_177210201	AA	delAA	M3	1274	0	1274	0	30581	0	30585	0	31308	0	31317	0	63163	0	63176	0	0	5.84008e-05	0	0	2.14169e-05		A
FAM11	NSD1	5:177210200_177210201	AA	delAA	M4	40941	0	40945	0	39151	1	39163	2.55343e-05	37696	0	37704	0	117788	1	117812	8.48976e-06	2.14942e-07	4.7301e-05	1.12419e-16	0	2.2307e-05		A
FAM11	NSD1	5:177210200_177210201	AA	delAA	M5	12328	1	12330	8.1103e-05	21462	1	21467	4.65831e-05	14389	1	14394	6.94734e-05	48179	3	48191	6.22639e-05	1.28405e-05	0.000181951	2.81396e-05	0	0.000129036		A
FAM11	NSD1	5:177210200_177210201	AA	delAA	Control1	13850	0	13851	0	21514	0	21516	0	19953	0	19957	0	55317	0	55324	0	0	6.6684e-05	NA	NA	NA		A
FAM11	NSD1	5:177210200_177210201	AA	delAA	Control2	44403	3	44416	6.75432e-05	1	0	1	0	1	0	1	0	44405	3	44418	6.75554e-05	1.39318e-05	0.000197413	NA	NA	NA		A
FAM11	NSD1	5:177210200_177210201	AA	delAA	Control3	17777	0	17778	0	18879	0	18882	0	22200	2	22207	9.00617e-05	58856	2	58867	3.39801e-05	4.11517e-06	0.000122742	NA	NA	NA		A
FAM12a (GRM1)	GRM1	6:146434372	C	dupC	C1	2341	2365	4709	0.50223	4274	4336	8628	0.50255	9561	9268	18840	0.491932	16176	15969	32177	0.49678	0.491299	0.502262	0.496732	0.491266	0.502198		A
FAM12a (GRM1)	GRM1	6:146434372	C	dupC	C2	2616	2762	5384	0.513001	4586	6205	10811	0.573952	4381	4349	8747	0.497199	11583	13316	24942	0.534801	0.528581	0.541012	0.534756	0.528556	0.540948		A
FAM12a (GRM1)	GRM1	6:146434372	C	dupC	C7	12718	12234	24975	0.48985	18136	18078	36260	0.498566	23924	22435	46403	0.483482	54778	52747	107638	0.490556	0.487563	0.493549	0.490507	0.487518	0.493495		A
FAM12a (GRM1)	GRM1	6:146434372	C	dupC	F1	11572	1	11579	8.63632e-05	26132	3	26149	0.000114727	37778	3	37793	7.93798e-05	75482	7	75521	9.27287e-05	3.72826e-05	0.000191047	3.43042e-07	0	9.21204e-05		A
FAM12a (GRM1)	GRM1	6:146434372	C	dupC	F2	12369	1	12376	8.08016e-05	10271	0	10278	0	88746	16	88803	0.000180174	111386	17	111457	0.000152599	8.8897e-05	0.000244315	5.89903e-05	0	0.00014953		A
FAM12a (GRM1)	GRM1	6:146434372	C	dupC	F3	8791	2	8797	0.00022735	36165	4	36185	0.000110543	45791	7	45824	0.000152758	90747	13	90806	0.000143235	7.62687e-05	0.000244924	4.97175e-05	0	0.000147705		A
FAM12a (GRM1)	GRM1	6:146434372	C	dupC	F4	8583	2	8588	0.000232883	8343	1	8348	0.000119789	8195	1	8201	0.000121936	25121	4	25137	0.000159204	4.33794e-05	0.000407575	6.52584e-05	0	0.000277775		A
FAM12a (GRM1)	GRM1	6:146434372	C	dupC	F5	17361	4	17374	0.000230229	17741	0	17746	0	4759	0	4760	0	39861	4	39880	0.000100339	2.73396e-05	0.000256887	7.68819e-06	0	0.000143373		A
FAM12a (GRM1)	GRM1	6:146434372	C	dupC	F6	11567	2	11573	0.000172816	21349	4	21361	0.000187257	30704	2	30723	6.50978e-05	63620	8	63657	0.000125731	5.42832e-05	0.000247725	3.24676e-05	0	0.000145111		A
FAM12a (GRM1)	GRM1	6:146434372	C	dupC	M1	5727	1	5735	0.000174368	7439	1	7443	0.000134354	19588	3	19600	0.000153061	32754	5	32778	0.00015263	4.95603e-05	0.000356151	5.88056e-05	0	0.000236659		A
FAM12a (GRM1)	GRM1	6:146434372	C	dupC	M2	2952	0	2953	0	32143	3	32161	9.32807e-05	14503	0	14510	0	49598	3	49624	6.04827e-05	1.24732e-05	0.000176746	1.19763e-16	0	7.79293e-05		A
FAM12a (GRM1)	GRM1	6:146434372	C	dupC	M3	6432	1	6433	0.000155448	6795	2	6800	0.000294118	14733	2	14744	0.000135648	27960	5	27977	0.000178795	5.80567e-05	0.000417198	8.46119e-05	0	0.000292192		A
FAM12a (GRM1)	GRM1	6:146434372	C	dupC	M4	9035	1	9040	0.000110619	6309	0	6314	0	34484	5	34504	0.000144911	49828	6	49858	0.0001204	4.41858e-05	0.000262041	2.72222e-05	0	0.00015438		A
FAM12a (GRM1)	GRM1	6:146434372	C	dupC	M5	8495	2	8500	0.000235294	38639	5	38661	0.000129329	43952	7	43974	0.000159185	91086	14	91135	0.000153677	8.40193e-05	0.000257831	6.00039e-05	0	0.00016048		A
FAM12a (GRM1)	GRM1	6:146434372	C	dupC	Control1	13892	0	13899	0	33250	3	33276	9.01551e-05	38848	6	38873	0.000154349	85990	9	86048	0.000104652	4.78548e-05	0.000198653	NA	NA	NA		A
FAM12a (GRM1)	GRM1	6:146434372	C	dupC	Control2	31180	2	31188	6.41272e-05	26354	2	26365	7.58581e-05	37250	2	37264	5.36711e-05	94784	6	94817	6.32978e-05	2.32295e-05	0.000137768	NA	NA	NA		A
FAM12a (GRM1)	GRM1	6:146434372	C	dupC	Control3	29051	2	29074	6.879e-05	28071	4	28080	0.00014245	11068	2	11074	0.000180603	68190	8	68228	0.000117305	5.06455e-05	0.000231125	NA	NA	NA		A
FAM12b (MECP2)	MECP2	X:154030621_154030664		del	C1	NA	NA	NA	NA	NA	NA	NA	NA	NA	NA	NA	NA	NA	NA	NA	NA	NA	NA	NA	NA	NA		A/D/E
FAM12b (MECP2)	MECP2	X:154030621_154030664		del	C2	NA	NA	NA	NA	NA	NA	NA	NA	NA	NA	NA	NA	NA	NA	NA	NA	NA	NA	NA	NA	NA		A/D/E
FAM12b (MECP2)	MECP2	X:154030621_154030664		del	C7	NA	NA	NA	NA	NA	NA	NA	NA	NA	NA	NA	NA	NA	NA	NA	NA	NA	NA	NA	NA	NA		A/D/E
FAM12b (MECP2)	MECP2	X:154030621_154030664		del	F1	NA	NA	NA	NA	NA	NA	NA	NA	NA	NA	NA	NA	NA	NA	NA	NA	NA	NA	NA	NA	NA		A/D/E
FAM12b (MECP2)	MECP2	X:154030621_154030664		del	F2	NA	NA	NA	NA	NA	NA	NA	NA	NA	NA	NA	NA	NA	NA	NA	NA	NA	NA	NA	NA	NA		A/D/E
FAM12b (MECP2)	MECP2	X:154030621_154030664		del	F3	NA	NA	NA	NA	NA	NA	NA	NA	NA	NA	NA	NA	NA	NA	NA	NA	NA	NA	NA	NA	NA		A/D/E
FAM12b (MECP2)	MECP2	X:154030621_154030664		del	F4	NA	NA	NA	NA	NA	NA	NA	NA	NA	NA	NA	NA	NA	NA	NA	NA	NA	NA	NA	NA	NA		A/D/E
FAM12b (MECP2)	MECP2	X:154030621_154030664		del	F5	NA	NA	NA	NA	NA	NA	NA	NA	NA	NA	NA	NA	NA	NA	NA	NA	NA	NA	NA	NA	NA		A/D/E
FAM12b (MECP2)	MECP2	X:154030621_154030664		del	F6	NA	NA	NA	NA	NA	NA	NA	NA	NA	NA	NA	NA	NA	NA	NA	NA	NA	NA	NA	NA	NA		A/D/E
FAM12b (MECP2)	MECP2	X:154030621_154030664		del	M1	NA	NA	NA	NA	NA	NA	NA	NA	NA	NA	NA	NA	NA	NA	NA	NA	NA	NA	NA	NA	NA		A/D/E
FAM12b (MECP2)	MECP2	X:154030621_154030664		del	M2	NA	NA	NA	NA	NA	NA	NA	NA	NA	NA	NA	NA	NA	NA	NA	NA	NA	NA	NA	NA	NA		A/D/E
FAM12b (MECP2)	MECP2	X:154030621_154030664		del	M3	NA	NA	NA	NA	NA	NA	NA	NA	NA	NA	NA	NA	NA	NA	NA	NA	NA	NA	NA	NA	NA		A/D/E
FAM12b (MECP2)	MECP2	X:154030621_154030664		del	M4	NA	NA	NA	NA	NA	NA	NA	NA	NA	NA	NA	NA	NA	NA	NA	NA	NA	NA	NA	NA	NA		A/D/E
FAM12b (MECP2)	MECP2	X:154030621_154030664		del	M5	NA	NA	NA	NA	NA	NA	NA	NA	NA	NA	NA	NA	NA	NA	NA	NA	NA	NA	NA	NA	NA		A/D/E
FAM12b (MECP2)	MECP2	X:154030621_154030664		del	Control1	NA	NA	NA	NA	NA	NA	NA	NA	NA	NA	NA	NA	NA	NA	NA	NA	NA	NA	NA	NA	NA		A/D/E
FAM12b (MECP2)	MECP2	X:154030621_154030664		del	Control2	NA	NA	NA	NA	NA	NA	NA	NA	NA	NA	NA	NA	NA	NA	NA	NA	NA	NA	NA	NA	NA		A/D/E
FAM12b (MECP2)	MECP2	X:154030621_154030664		del	Control3	NA	NA	NA	NA	NA	NA	NA	NA	NA	NA	NA	NA	NA	NA	NA	NA	NA	NA	NA	NA	NA		A/D/E
FAM13	RHOBTB2	8:23007627	G	A	C1	4433	5074	9508	0.533656	3054	3310	6364	0.520113	3654	3734	7388	0.505414	11141	12118	23260	0.521003	0.514559	0.527441	0.520942	0.514519	0.52736		D/E
FAM13	RHOBTB2	8:23007627	G	A	C2	5832	6104	11937	0.511351	1512	1282	2794	0.45884	2631	2415	5046	0.478597	9975	9801	19777	0.495601	0.488608	0.502595	0.495536	0.488568	0.502506		D/E
FAM13	RHOBTB2	8:23007627	G	A	C7	4819	5135	9956	0.515769	3604	3932	7536	0.521762	4922	5222	10144	0.514787	13345	14289	27636	0.51708	0.511169	0.522988	0.517019	0.511125	0.52291		D/E
FAM13	RHOBTB2	8:23007627	G	A	F1	16827	1	16830	5.94177e-05	6871	0	6872	0	9346	0	9346	0	33044	1	33048	3.02618e-05	7.66161e-07	0.000168596	8.2863e-17	0	7.60011e-05		D/E
FAM13	RHOBTB2	8:23007627	G	A	F2	15907	0	15907	0	6724	0	6724	0	8194	0	8195	0	30825	0	30826	0	0	0.000119665	0	0	4.38846e-05		D/E
FAM13	RHOBTB2	8:23007627	G	A	F3	14369	1	14370	6.95894e-05	8108	1	8110	0.000123305	6237	3	6241	0.000480692	28714	5	28721	0.000174101	5.65324e-05	0.000406246	5.43769e-05	0	0.000261141		D/E
FAM13	RHOBTB2	8:23007627	G	A	F4	14686	1	14688	6.80828e-05	6012	1	6013	0.000166306	10308	1	10309	9.70026e-05	31006	3	31010	9.67461e-05	1.99518e-05	0.000282707	1.17554e-16	0	0.000144634		D/E
FAM13	RHOBTB2	8:23007627	G	A	F5	19972	0	19973	0	12661	0	12662	0	10821	2	10823	0.000184792	43454	2	43458	4.60236e-05	5.57372e-06	0.000166243	1.47455e-16	0	7.00786e-05		D/E
FAM13	RHOBTB2	8:23007627	G	A	F6	19038	6	19044	0.00031506	13983	3	13986	0.0002145	10494	3	10498	0.000285769	43515	12	43528	0.000275691	0.000142461	0.000481527	0.000153803	2.81441e-06	0.000349201		D/E
FAM13	RHOBTB2	8:23007627	G	A	M1	52449	5	52458	9.53143e-05	40823	2	40831	4.89824e-05	35217	2	35222	5.67827e-05	128489	9	128511	7.004e-05	3.20272e-05	0.000132954	1.38688e-16	0	4.56599e-05		D/E
FAM13	RHOBTB2	8:23007627	G	A	M2	32667	0	32670	0	19921	0	19924	0	24432	2	24434	8.18532e-05	77020	2	77028	2.59666e-05	3.14469e-06	9.37971e-05	1.34612e-16	0	3.48487e-05		D/E
FAM13	RHOBTB2	8:23007627	G	A	M3	16580	3	16584	0.000180897	5809	0	5809	0	13700	6	13706	0.000437764	36089	9	36099	0.000249321	0.000114012	0.000473236	0.000127761	0	0.000335679		D/E
FAM13	RHOBTB2	8:23007627	G	A	M4	9090	2	9093	0.000219949	5151	1	5152	0.000194099	6633	0	6634	0	20874	3	20879	0.000143699	2.96351e-05	0.000419891	2.51685e-05	0	0.000258814		D/E
FAM13	RHOBTB2	8:23007627	G	A	M5	53572	7	53581	0.000130643	51345	17	51365	0.000330965	49248	6	49256	0.000121813	154165	30	154202	0.000194559	0.000131272	0.000277733	7.55619e-05	0	0.000172579		D/E
FAM13	RHOBTB2	8:23007627	G	A	Control1	7145	0	7145	0	6851	2	6853	0.000291843	9729	1	9731	0.000102764	23725	3	23729	0.000126433	2.60743e-05	0.000369446	NA	NA	NA		D/E
FAM13	RHOBTB2	8:23007627	G	A	Control2	12978	1	12981	7.70357e-05	10959	0	10959	0	8852	3	8855	0.000338792	32789	4	32795	0.000121977	3.32357e-05	0.00031228	NA	NA	NA		D/E
FAM13	RHOBTB2	8:23007627	G	A	Control3	21324	2	21327	9.37778e-05	6396	1	6397	0.000156323	9877	1	9879	0.000101225	37597	4	37603	0.00010638	2.89857e-05	0.000272353	NA	NA	NA		D/E
FAM15	RAF1	3:12604194	G	C	C1	NA	NA	NA	NA	NA	NA	NA	NA	NA	NA	NA	NA	NA	NA	NA	NA	NA	NA	NA	NA	NA		A
FAM15	RAF1	3:12604194	G	C	C2	NA	NA	NA	NA	NA	NA	NA	NA	NA	NA	NA	NA	NA	NA	NA	NA	NA	NA	NA	NA	NA		A
FAM15	RAF1	3:12604194	G	C	C7	18229	17198	35429	0.485422	16428	14988	31416	0.477082	11911	10875	22790	0.477183	46568	43061	89635	0.480436	0.47716	0.483713	0.480424	0.477154	0.483696		A
FAM15	RAF1	3:12604194	G	C	F1	16940	0	16941	0	5686	0	5687	0	7347	1	7348	0.000136091	29973	1	29976	3.33622e-05	8.44659e-07	0.000185868	1.3553e-05	0	0.000127079		A
FAM15	RAF1	3:12604194	G	C	F2	25078	0	25080	0	19438	0	19439	0	20966	0	20968	0	65482	0	65487	0	0	5.63327e-05	0	0	2.06585e-05		A
FAM15	RAF1	3:12604194	G	C	F3	25440	1	25442	3.93051e-05	14059	1	14060	7.11238e-05	10572	0	10573	0	50071	2	50075	3.99417e-05	4.83716e-06	0.000144276	1.983e-05	0	0.000103838		A
FAM15	RAF1	3:12604194	G	C	F4	31689	0	31693	0	18934	0	18934	0	25346	0	25346	0	75969	0	75973	0	0	4.85565e-05	0	0	1.78067e-05		A
FAM15	RAF1	3:12604194	G	C	F5	14859	0	14860	0	5088	0	5088	0	4825	0	4826	0	24772	0	24774	0	0	0.000148902	0	0	5.46074e-05		A
FAM15	RAF1	3:12604194	G	C	F6	39408	0	39410	0	11342	0	11342	0	18527	0	18527	0	69277	0	69279	0	0	5.32468e-05	0	0	1.95268e-05		A
FAM15	RAF1	3:12604194	G	C	M1	32436	1	32441	3.08252e-05	12649	1	12651	7.90451e-05	22302	0	22302	0	67387	2	67394	2.96784e-05	3.59422e-06	0.000107205	1.0263e-05	0	7.30047e-05		A
FAM15	RAF1	3:12604194	G	C	M2	23920	0	23921	0	13663	1	13664	7.3185e-05	13068	0	13068	0	50651	1	50653	1.97426e-05	4.99838e-07	0.000109994	1.43306e-06	0	6.86157e-05		A
FAM15	RAF1	3:12604194	G	C	M3	35802	1	35805	2.79291e-05	34653	1	34659	2.88525e-05	34575	1	34578	2.89201e-05	105030	3	105042	2.85625e-05	5.8903e-06	8.34693e-05	9.33819e-06	0	5.62291e-05		A
FAM15	RAF1	3:12604194	G	C	M4	26570	2	26574	7.52615e-05	21138	0	21139	0	17811	0	17811	0	65519	2	65524	3.05246e-05	3.69669e-06	0.000110261	1.10375e-05	0	7.55288e-05		A
FAM15	RAF1	3:12604194	G	C	M5	NA	NA	NA	NA	10782	0	10782	0	96472	1	96481	1.03647e-05	107254	1	107263	9.32357e-06	2.36052e-07	5.19465e-05	1.26539e-16	0	2.75661e-05		A
FAM15	RAF1	3:12604194	G	C	Control1	34065	2	34067	5.87078e-05	29059	0	29061	0	23203	0	23204	0	86327	2	86332	2.31672e-05	2.80567e-06	8.36853e-05	NA	NA	NA		A
FAM15	RAF1	3:12604194	G	C	Control2	26107	0	26110	0	15054	1	15055	6.64231e-05	15243	1	15244	6.55996e-05	56404	2	56409	3.54572e-05	4.29406e-06	0.000128078	NA	NA	NA		A
FAM15	RAF1	3:12604194	G	C	Control3	44103	0	44105	0	16698	0	16700	0	18893	0	18895	0	79694	0	79700	0	0	4.6287e-05	NA	NA	NA		A
FAM16	TSC2	16:2088585	T	dupT	C1	13277	13986	27275	0.512777	17955	15658	33626	0.465652	9046	8761	17810	0.491915	40278	38405	78711	0.488098	0.484599	0.491597	0.488001	0.484508	0.491495		A
FAM16	TSC2	16:2088585	T	dupT	C2	12981	16650	29635	0.561836	5662	7304	12972	0.563059	14553	16847	31412	0.536324	33196	40801	74019	0.551387	0.547795	0.554975	0.551303	0.547717	0.554885		A
FAM16	TSC2	16:2088585	T	dupT	C7	36680	36755	73454	0.500381	24530	27899	52446	0.531957	42858	39752	82669	0.480857	104068	104406	208569	0.500811	0.498662	0.502959	0.500717	0.49857	0.502863		A
FAM16	TSC2	16:2088585	T	dupT	F1	39299	10	39320	0.000254323	20515	10	20529	0.000487116	34394	9	34406	0.000261582	94208	29	94255	0.000307735	0.000206104	0.000441929	0.000119968	1.61884e-05	0.000248882		A
FAM16	TSC2	16:2088585	T	dupT	F2	55616	12	55639	0.000215676	33770	5	33775	0.000148038	61089	14	61107	0.000229106	150475	31	150521	0.000205972	0.000139952	0.000292348	1.8538e-05	0	0.000104271		A
FAM16	TSC2	16:2088585	T	dupT	F3	64749	11	64772	0.000169826	49651	11	49674	0.000221444	75022	9	75044	0.00011993	189422	31	189490	0.000163629	0.000111181	0.00023225	1.23759e-16	0	5.11865e-05		A
FAM16	TSC2	16:2088585	T	dupT	F4	17000	1	17003	5.88132e-05	37601	6	37617	0.000159502	36023	8	36033	0.000222019	90624	15	90653	0.000165492	9.26273e-05	0.000272939	1.25168e-16	0	8.34444e-05		A
FAM16	TSC2	16:2088585	T	dupT	F5	52173	13	52191	0.000249085	35515	8	35529	0.000225168	26900	10	26913	0.000371568	114588	31	114633	0.000270461	0.000183772	0.000383876	8.27917e-05	0	0.000192944		A
FAM16	TSC2	16:2088585	T	dupT	F6	61204	23	61245	0.000375541	53755	15	53774	0.000278945	51206	8	51219	0.000156192	166165	46	166238	0.000276757	0.000202628	0.000369138	8.90835e-05	1.0098e-05	0.000181212		A
FAM16	TSC2	16:2088585	T	dupT	M1	76899	10	76931	0.000129987	46107	5	46122	0.000108408	80248	10	80274	0.000124573	203254	25	203327	0.000122984	7.95901e-05	0.000181543	7.64905e-17	0	2.77698e-05		A
FAM16	TSC2	16:2088585	T	dupT	M2	49769	11	49794	0.00022091	45846	5	45856	0.000109037	106670	22	106707	0.000206172	202285	38	202357	0.000187818	0.000132915	0.000257787	4.73585e-07	0	7.21691e-05		A
FAM16	TSC2	16:2088585	T	dupT	M3	79148	16	79185	0.000202058	121541	20	121581	0.000164499	150977	12	151004	7.94681e-05	351666	48	351770	0.000136475	0.000100627	0.000180941	9.30004e-17	0	2.23499e-05		A
FAM16	TSC2	16:2088585	T	dupT	M4	71888	9	71908	0.00012516	119672	18	119711	0.000150362	70286	16	70313	0.000227554	261846	43	261932	0.000164192	0.000118829	0.000221159	1.24185e-16	0	4.253e-05		A
FAM16	TSC2	16:2088585	T	dupT	M5	36417	4	36432	0.000109794	35130	5	35140	0.000142288	50441	11	50458	0.000218003	121988	20	122030	0.000163924	0.000100132	0.000253156	1.23982e-16	0	6.77098e-05		A
FAM16	TSC2	16:2088585	T	dupT	Control1	150977	12	151004	7.94681e-05	54524	7	54543	0.000128339	104881	27	104931	0.000257312	310382	46	310478	0.000148183	0.00010849	0.00019765	NA	NA	NA		A
FAM16	TSC2	16:2088585	T	dupT	Control2	34720	4	34728	0.000115181	74133	22	74165	0.000296636	219522	47	219591	0.000214034	328375	73	328484	0.000222257	0.000174218	0.000279447	NA	NA	NA		A
FAM16	TSC2	16:2088585	T	dupT	Control3	29251	4	29258	0.000136715	64219	7	64235	0.000108975	84305	23	84332	0.000272732	177775	34	177825	0.000191216	0.000132426	0.000267196	NA	NA	NA		A
FAM17	PTPN11	12:112477651	T	C	C1	NA	NA	NA	NA	NA	NA	NA	NA	NA	NA	NA	NA	NA	NA	NA	NA	NA	NA	NA	NA	NA		F
FAM17	PTPN11	12:112477651	T	C	C2	NA	NA	NA	NA	NA	NA	NA	NA	NA	NA	NA	NA	NA	NA	NA	NA	NA	NA	NA	NA	NA		F
FAM17	PTPN11	12:112477651	T	C	C7	6474	6168	12643	0.487859	9297	8705	18004	0.483504	3713	3410	7123	0.478731	19484	18283	37770	0.4841	0.479048	0.489154	0.484037	0.478998	0.489079		F
FAM17	PTPN11	12:112477651	T	C	F1	11859	1	11860	8.4317e-05	11440	3	11443	0.000262169	8108	2	8111	0.000246579	31407	6	31414	0.000191004	7.00981e-05	0.000415688	7.42323e-05	0	0.000274705		F
FAM17	PTPN11	12:112477651	T	C	F2	7843	1	7844	0.000127486	14387	2	14389	0.000138995	22505	1	22508	4.44286e-05	44735	4	44741	8.94075e-05	2.4361e-05	0.000228903	1.03023e-16	0	0.000104748		F
FAM17	PTPN11	12:112477651	T	C	F3	12542	2	12545	0.000159426	18589	0	18590	0	14143	6	14151	0.000423998	45274	8	45286	0.000176671	7.62768e-05	0.000348082	6.02788e-05	0	0.000218459		F
FAM17	PTPN11	12:112477651	T	C	F4	11372	2	11375	0.000175824	17561	1	17562	5.69411e-05	7806	0	7807	0	36739	3	36744	8.16504e-05	1.68386e-05	0.000238598	8.7663e-17	0	0.00011091		F
FAM17	PTPN11	12:112477651	T	C	F5	NA	NA	NA	NA	NA	NA	NA	NA	NA	NA	NA	NA	NA	NA	NA	NA	NA	NA	NA	NA	NA		F
FAM17	PTPN11	12:112477651	T	C	F6	13731	1	13732	7.28226e-05	26966	2	26971	7.41537e-05	12685	0	12685	0	53382	3	53388	5.61956e-05	1.1589e-05	0.000164218	1.0603e-16	0	6.44181e-05		F
FAM17	PTPN11	12:112477651	T	C	M1	11722	1354	13078	0.103533	5314	534	5849	0.0912977	8271	892	9163	0.097348	25307	2780	28090	0.0989782	0.0955095	0.10253	0.0988692	0.0954126	0.102399		F
FAM17	PTPN11	12:112477651	T	C	M2	8468	596	9064	0.0657546	11687	835	12524	0.066672	10321	711	11033	0.064443	30476	2142	32621	0.0656693	0.0630046	0.0684116	0.0655563	0.0629014	0.0682794		F
FAM17	PTPN11	12:112477651	T	C	M3	16555	144	16702	0.00862172	9128	92	9221	0.00997723	637	1	638	0.0015674	26320	237	26561	0.0089242	0.00782827	0.0101295	0.00880447	0.00771873	0.00998466		F
FAM17	PTPN11	12:112477651	T	C	M4	10503	82	10586	0.00774608	9019	101	9121	0.0110733	21911	180	22094	0.00814701	41433	363	41801	0.00868504	0.00781779	0.00962154	0.0085653	0.00770373	0.00948679		F
FAM17	PTPN11	12:112477651	T	C	M5	7280	465	7745	0.0600387	5150	340	5490	0.0619308	1778	116	1894	0.061246	14208	921	15129	0.0608765	0.0571181	0.0648047	0.0607629	0.0570263	0.0646482		F
FAM17	PTPN11	12:112477651	T	C	Control1	23065	1	23069	4.33482e-05	7060	2	7062	0.000283206	14560	2	14564	0.000137325	44685	5	44695	0.000111882	3.63287e-05	0.000261075	NA	NA	NA		F
FAM17	PTPN11	12:112477651	T	C	Control2	31998	2	32002	6.24961e-05	8791	1	8792	0.00011374	15371	1	15372	6.50533e-05	56160	4	56166	7.122e-05	1.94054e-05	0.000182341	NA	NA	NA		F
FAM17	PTPN11	12:112477651	T	C	Control3	23079	1	23081	4.33257e-05	17363	4	17369	0.000230295	15860	4	15867	0.000252096	56302	9	56317	0.000159827	7.30855e-05	0.000303379	NA	NA	NA		F
FAM18	CHD7	8:60821831	T	G	C1	11981	11496	23480	0.489608	6797	6659	13457	0.494835	7991	7645	15638	0.488873	26769	25800	52575	0.490784	0.486501	0.495067	0.490746	0.486472	0.49502		A/D/E
FAM18	CHD7	8:60821831	T	G	C2	8425	8724	17152	0.508629	7468	7211	14681	0.491179	15699	16442	32145	0.511495	31592	32377	63978	0.506136	0.502253	0.510018	0.506099	0.502224	0.509973		A/D/E
FAM18	CHD7	8:60821831	T	G	C7	7424	7085	14510	0.488284	11234	11075	22312	0.49637	14837	14691	29534	0.497427	33495	32851	66356	0.495147	0.491335	0.498959	0.495109	0.491304	0.498914		A/D/E
FAM18	CHD7	8:60821831	T	G	F1	24637	0	24641	0	28525	1	28535	3.50447e-05	34425	0	34428	0	87587	1	87604	1.14171e-05	2.89056e-07	6.36103e-05	8.09375e-17	0	2.65722e-05		A/D/E
FAM18	CHD7	8:60821831	T	G	F2	8330	1	8332	0.000120019	16176	0	16177	0	12293	1	12296	8.13273e-05	36799	2	36805	5.43463e-05	6.58166e-06	0.000196304	1.00106e-16	0	0.000103148		A/D/E
FAM18	CHD7	8:60821831	T	G	F3	12510	0	12511	0	15930	1	15933	6.27628e-05	20622	1	20627	4.84801e-05	49062	2	49071	4.07631e-05	4.93664e-06	0.000147242	1.30601e-16	0	6.92085e-05		A/D/E
FAM18	CHD7	8:60821831	T	G	F4	8639	0	8639	0	10204	0	10205	0	15154	3	15158	0.000197915	33997	3	34002	8.82353e-05	1.81966e-05	0.000257839	1.74836e-05	0	0.000160131		A/D/E
FAM18	CHD7	8:60821831	T	G	F5	7580	0	7582	0	10960	0	10964	0	11409	0	11412	0	29949	0	29958	0	0	0.000123164	0	0	4.51682e-05		A/D/E
FAM18	CHD7	8:60821831	T	G	F6	14953	2	14957	0.000133717	13329	0	13331	0	22636	3	22646	0.000132474	50918	5	50934	9.81875e-05	3.18819e-05	0.000229122	2.71518e-05	0	0.000143189		A/D/E
FAM18	CHD7	8:60821831	T	G	M1	34797	3	34812	8.61772e-05	34524	3	34536	8.68659e-05	39054	1	39063	2.55997e-05	108375	7	108411	6.45864e-05	2.59675e-05	0.000133068	1.27889e-16	0	6.16657e-05		A/D/E
FAM18	CHD7	8:60821831	T	G	M2	29742	0	29745	0	37086	0	37095	0	37904	5	37918	0.000131863	104732	5	104758	4.77386e-05	1.55008e-05	0.000111402	7.89352e-17	0	4.52254e-05		A/D/E
FAM18	CHD7	8:60821831	T	G	M3	10333	0	10335	0	16642	0	16643	0	18369	0	18370	0	45344	0	45348	0	0	8.13499e-05	0	0	2.98331e-05		A/D/E
FAM18	CHD7	8:60821831	T	G	M4	NA	NA	NA	NA	14374	0	14376	0	19221	1	19227	5.20102e-05	33595	1	33603	2.97654e-05	7.53596e-07	0.000165831	8.02901e-17	0	8.14931e-05		A/D/E
FAM18	CHD7	8:60821831	T	G	M5	14970	7	14977	0.000467383	15894	2	15899	0.000125794	18997	10	19011	0.000526011	49861	19	49887	0.000380914	0.00022935	0.000594781	0.000307425	0.000155594	0.000507787		A/D/E
FAM18	CHD7	8:60821831	T	G	Control1	13488	2	13492	0.000148236	22450	3	22456	0.000133595	20624	1	20626	4.84825e-05	56562	6	56574	0.000106067	3.89257e-05	0.000230849	NA	NA	NA		A/D/E
FAM18	CHD7	8:60821831	T	G	Control2	27115	3	27124	0.000110603	28678	2	28690	6.97107e-05	31893	1	31897	3.13509e-05	87686	6	87711	6.84213e-05	2.51098e-05	0.000148918	NA	NA	NA		A/D/E
FAM18	CHD7	8:60821831	T	G	Control3	16364	0	16364	0	26982	1	26987	3.70549e-05	26983	2	26990	7.41015e-05	70329	3	70341	4.26548e-05	8.79654e-06	0.00012465	NA	NA	NA		A/D/E
FAM19	SHOC2	10:110964362	A	G	C1	7562	7487	15049	0.497508	6777	7058	13837	0.510082	7678	8107	15786	0.513556	22017	22652	44672	0.507108	0.50246	0.511755	0.507021	0.502383	0.511657		A
FAM19	SHOC2	10:110964362	A	G	C2	4709	5591	10302	0.54271	4419	5081	9501	0.534786	3755	4366	8122	0.537552	12883	15038	27925	0.538591	0.532722	0.544452	0.53851	0.532658	0.544354		A
FAM19	SHOC2	10:110964362	A	G	C7	11340	10768	22111	0.486997	9922	9889	19814	0.499092	11879	11953	23836	0.501468	33141	32610	65761	0.495962	0.492133	0.499791	0.495873	0.492051	0.499696		A
FAM19	SHOC2	10:110964362	A	G	F1	26305	4	26313	0.000152016	20049	2	20053	9.97357e-05	17684	0	17686	0	64038	6	64052	9.36856e-05	3.43817e-05	0.000203903	1.11494e-16	0	6.2476e-05		A
FAM19	SHOC2	10:110964362	A	G	F2	13834	0	13835	0	17100	3	17104	0.000175398	16506	3	16509	0.000181719	47440	6	47448	0.00012646	4.64098e-05	0.000275229	8.07442e-17	0	0.000103959		A
FAM19	SHOC2	10:110964362	A	G	F3	18330	1	18333	5.45464e-05	21296	2	21299	9.39011e-05	19672	6	19678	0.000304909	59298	9	59310	0.000151753	6.93933e-05	0.000288054	1.11698e-16	0	0.00011316		A
FAM19	SHOC2	10:110964362	A	G	F4	17188	17	17207	0.00098797	25642	25	25670	0.000973899	24658	25	24686	0.00101272	67488	67	67563	0.000991784	0.000768699	0.00125936	0.000816449	0.00058952	0.00107851		A
FAM19	SHOC2	10:110964362	A	G	F5	NA	NA	NA	NA	NA	NA	NA	NA	NA	NA	NA	NA	NA	NA	NA	NA	NA	NA	NA	NA	NA		A
FAM19	SHOC2	10:110964362	A	G	F6	24670	2	24677	8.10471e-05	27803	1	27806	3.59635e-05	31695	9	31705	0.000283867	84168	12	84188	0.000142552	7.36606e-05	0.000248996	1.00437e-16	0	8.40715e-05		A
FAM19	SHOC2	10:110964362	A	G	M1	16216	1	16220	6.16523e-05	14936	1	14937	6.69478e-05	14918	3	14922	0.000201045	46070	5	46079	0.000108519	3.52366e-05	0.000253228	1.32803e-16	0	9.13422e-05		A
FAM19	SHOC2	10:110964362	A	G	M2	19707	4	19712	0.000202922	19692	2	19694	0.000101554	23341	5	23348	0.000214151	62740	11	62754	0.000175296	8.75103e-05	0.000313631	3.46399e-06	0	0.000137173		A
FAM19	SHOC2	10:110964362	A	G	M3	18860	1	18863	5.30138e-05	25341	6	25347	0.000236714	24316	0	24318	0	68517	7	68528	0.000102154	4.10722e-05	0.000210465	1.25014e-16	0	6.41225e-05		A
FAM19	SHOC2	10:110964362	A	G	M4	19318	2	19321	0.000103514	16859	0	16862	0	21044	2	21046	9.50299e-05	57221	4	57229	6.98995e-05	1.90456e-05	0.000178961	1.3841e-16	0	5.59264e-05		A
FAM19	SHOC2	10:110964362	A	G	M5	153	0	153	0	NA	NA	NA	NA	NA	NA	NA	NA	NA	NA	NA	NA	NA	NA	NA	NA	NA		A
FAM19	SHOC2	10:110964362	A	G	Control1	18780	1	18784	5.32368e-05	21586	3	21589	0.00013896	21384	8	21395	0.000373919	61750	12	61768	0.000194294	0.000100399	0.000339368	NA	NA	NA		A
FAM19	SHOC2	10:110964362	A	G	Control2	26298	3	26303	0.000114055	28199	7	28207	0.000248165	29292	3	29297	0.0001024	83789	13	83807	0.000155128	8.26014e-05	0.000265258	NA	NA	NA		A
FAM19	SHOC2	10:110964362	A	G	Control3	24070	3	24073	0.000124621	19559	0	19561	0	20392	8	20402	0.000392118	64021	11	64036	0.000171789	8.57595e-05	0.000307357	NA	NA	NA		A
FAM20	CLTC	17:59681719	T	C	C1	13476	13224	26700	0.495281	2937	2867	5806	0.4938	3513	3379	6892	0.490279	19926	19470	39398	0.494213	0.489264	0.499163	0.494143	0.489206	0.499081		A
FAM20	CLTC	17:59681719	T	C	C2	3734	3681	7416	0.496359	2120	1916	4036	0.474727	2906	3404	6310	0.539461	8760	9001	17762	0.506785	0.499403	0.514164	0.506717	0.499363	0.514069		A
FAM20	CLTC	17:59681719	T	C	C7	12681	12171	24857	0.489641	713	671	1385	0.484477	23661	22378	46041	0.486045	37055	35220	72283	0.487305	0.483655	0.490957	0.487235	0.483591	0.49088		A
FAM20	CLTC	17:59681719	T	C	F1	21650	2	21653	9.2366e-05	11129	0	11130	0	22149	1	22151	4.51447e-05	54928	3	54934	5.4614e-05	1.12629e-05	0.000159597	1.00963e-16	0	5.75951e-05		A
FAM20	CLTC	17:59681719	T	C	F2	14877	1	14878	6.72133e-05	16789	7	16796	0.000416766	23414	4	23418	0.000170809	55080	12	55092	0.000217817	0.000112554	0.000380452	8.45885e-05	0	0.000238719		A
FAM20	CLTC	17:59681719	T	C	F3	22743	3	22748	0.00013188	31745	1	31747	3.1499e-05	31079	3	31082	9.65189e-05	85567	7	85577	8.18005e-05	3.28887e-05	0.000168533	8.79603e-17	0	5.53695e-05		A
FAM20	CLTC	17:59681719	T	C	F4	15600	2	15602	0.000128189	13684	1	13685	7.30727e-05	7439	0	7439	0	36723	3	36726	8.1686e-05	1.68459e-05	0.000238702	8.77334e-17	0	0.000102405		A
FAM20	CLTC	17:59681719	T	C	F5	NA	NA	NA	NA	14362	4	14367	0.000278416	15158	5	15163	0.00032975	29520	9	29530	0.000304785	0.000139376	0.000578498	0.000170508	1.60264e-06	0.000419108		A
FAM20	CLTC	17:59681719	T	C	F6	29565	8	29574	0.000270508	34178	5	34183	0.000146272	15019	3	15022	0.000199707	78762	16	78779	0.000203102	0.000116095	0.000329805	7.01934e-05	0	0.000195088		A
FAM20	CLTC	17:59681719	T	C	M1	18815	2	18819	0.000106276	25901	2	25903	7.72111e-05	7038	1	7039	0.000142066	51754	5	51761	9.66016e-05	3.1367e-05	0.000225421	1.17268e-16	0	9.22233e-05		A
FAM20	CLTC	17:59681719	T	C	M2	23478	1	23479	4.25913e-05	279	0	279	0	10275	3	10278	0.000291886	34032	4	34036	0.000117523	3.20219e-05	0.000300877	1.43822e-16	0	0.000148074		A
FAM20	CLTC	17:59681719	T	C	M3	26873	6	26881	0.000223206	35458	3	35462	8.45976e-05	2699	1	2700	0.00037037	65030	10	65043	0.000153752	7.37322e-05	0.000282736	2.17313e-05	0	0.000145647		A
FAM20	CLTC	17:59681719	T	C	M4	25638	20	25661	0.000779393	126	1	127	0.00787402	2932	0	2932	0	28696	21	28720	0.000731274	0.000452725	0.00111761	0.0005956	0.000319707	0.00095748		A
FAM20	CLTC	17:59681719	T	C	M5	6445	2	6447	0.000310222	12470	2	12473	0.000160346	23491	2	23493	8.51317e-05	42406	6	42413	0.000141469	5.19185e-05	0.000307894	9.73639e-06	0	0.000160797		A
FAM20	CLTC	17:59681719	T	C	Control1	32151	5	32156	0.000155492	2477	2	2479	0.000806777	13325	0	13327	0	47953	7	47962	0.000145955	5.86834e-05	0.0003007	NA	NA	NA		A
FAM20	CLTC	17:59681719	T	C	Control2	19506	1	19507	5.12636e-05	1951	0	1951	0	30299	5	30304	0.000164995	51756	6	51762	0.000115915	4.254e-05	0.000252281	NA	NA	NA		A
FAM20	CLTC	17:59681719	T	C	Control3	26436	4	26440	0.000151286	22764	3	22767	0.00013177	33694	4	33698	0.000118701	82894	11	82905	0.000132682	6.62362e-05	0.000237392	NA	NA	NA		A
FAM21	EFTUD2	17:44880581	A	dupA	C1	3728	3862	7593	0.508626	3383	3385	6769	0.500074	5882	5901	11786	0.500679	12993	13148	26148	0.502965	0.496884	0.509044	0.502922	0.49686	0.508983		A
FAM21	EFTUD2	17:44880581	A	dupA	C2	7394	7554	14952	0.505217	5694	5945	11641	0.510695	7625	8343	15969	0.52245	20713	21842	42562	0.513265	0.508504	0.518025	0.513223	0.508473	0.517971		A
FAM21	EFTUD2	17:44880581	A	dupA	C7	10684	10658	21350	0.499204	9578	8891	18472	0.481323	8261	8310	16573	0.501418	28523	27859	56395	0.494112	0.489976	0.498248	0.494068	0.489941	0.498195		A
FAM21	EFTUD2	17:44880581	A	dupA	F1	8923	0	8926	0	10769	1	10773	9.28247e-05	17307	2	17311	0.000115533	36999	3	37010	8.10767e-05	1.67203e-05	0.000236922	1.3361e-06	0	0.00013434		A
FAM21	EFTUD2	17:44880581	A	dupA	F2	19624	0	19627	0	17404	1	17409	5.74416e-05	19865	2	19870	0.000100654	56893	3	56906	5.27278e-05	1.08739e-05	0.000154085	9.492e-17	0	7.10706e-05		A
FAM21	EFTUD2	17:44880581	A	dupA	F3	23556	0	23558	0	18857	2	18862	0.000106033	22877	2	22881	8.74088e-05	65290	4	65301	6.12614e-05	1.66919e-05	0.000156846	1.21305e-16	0	7.35153e-05		A
FAM21	EFTUD2	17:44880581	A	dupA	F4	13633	1	13637	7.33299e-05	19408	1	19415	5.15066e-05	17114	1	17116	5.84249e-05	50155	3	50168	5.9811e-05	1.23346e-05	0.000174783	1.17614e-16	0	8.5369e-05		A
FAM21	EFTUD2	17:44880581	A	dupA	F5	14472	1	14473	6.90942e-05	10162	0	10162	0	11930	0	11931	0	36564	1	36566	2.73486e-05	6.92405e-07	0.000152367	1.41776e-16	0	7.21669e-05		A
FAM21	EFTUD2	17:44880581	A	dupA	F6	24458	1	24463	4.08781e-05	25822	15	25840	0.000580495	17148	2	17151	0.000116611	67428	18	67454	0.00026688	0.000158178	0.000421753	0.000182894	6.47857e-05	0.000331575		A
FAM21	EFTUD2	17:44880581	A	dupA	M1	10472	0	10472	0	12346	1	12348	8.09848e-05	11307	0	11309	0	34125	1	34129	2.93032e-05	7.41892e-07	0.000163256	7.78936e-17	0	7.83682e-05		A
FAM21	EFTUD2	17:44880581	A	dupA	M2	9825	0	9826	0	8605	0	8607	0	12958	0	12961	0	31388	0	31394	0	0	0.000117518	0	0	4.30974e-05		A
FAM21	EFTUD2	17:44880581	A	dupA	M3	17195	0	17196	0	15213	0	15215	0	18089	1	18091	5.52761e-05	50497	1	50502	1.98028e-05	5.01362e-07	0.000110329	9.20894e-17	0	4.94175e-05		A
FAM21	EFTUD2	17:44880581	A	dupA	M4	12543	9	12554	0.000716903	15185	2	15191	0.000131657	15369	3	15374	0.000195135	43097	14	43119	0.000324743	0.000177551	0.000544804	0.00024013	8.85108e-05	0.000445259		A
FAM21	EFTUD2	17:44880581	A	dupA	M5	33500	1	33504	2.98472e-05	30458	3	30463	9.84801e-05	22978	0	22979	0	86936	4	86946	4.60087e-05	1.2536e-05	0.000117796	1.47408e-16	0	4.7932e-05		A
FAM21	EFTUD2	17:44880581	A	dupA	Control1	18406	1	18410	5.43183e-05	26590	2	26597	7.51965e-05	18519	0	18523	0	63515	3	63530	4.72307e-05	9.74021e-06	0.000138022	NA	NA	NA		A
FAM21	EFTUD2	17:44880581	A	dupA	Control2	11061	2	11065	0.00018075	11063	1	11067	9.03587e-05	11263	2	11265	0.000177541	33387	5	33397	0.000149736	4.86208e-05	0.0003494	NA	NA	NA		A
FAM21	EFTUD2	17:44880581	A	dupA	Control3	11946	3	11950	0.000251046	11919	0	11921	0	17344	0	17350	0	41209	3	41221	7.27943e-05	1.50122e-05	0.000212721	NA	NA	NA		A
FAM22	BRAF	7:140801502	T	C	C1	1532	1610	3142	0.512412	1497	1692	3189	0.530574	2402	2611	5013	0.520846	5431	5913	11344	0.521245	0.512003	0.530475	0.521132	0.511933	0.530321		A/D/E
FAM22	BRAF	7:140801502	T	C	C2	19661	17635	37301	0.472776	18742	17997	36743	0.489808	16696	15514	32215	0.481577	55099	51146	106259	0.481397	0.478388	0.484406	0.481274	0.478269	0.48428		A/D/E
FAM22	BRAF	7:140801502	T	C	C7	11135	11126	22263	0.499753	12079	10901	22984	0.474286	13142	12049	25192	0.478287	36356	34076	70439	0.483814	0.480117	0.487513	0.483692	0.480001	0.487385		A/D/E
FAM22	BRAF	7:140801502	T	C	F1	29240	8	29251	0.000273495	22426	8	22435	0.000356586	61142	13	61167	0.000212533	112808	29	112853	0.000257008	0.000172129	0.000369086	2.95096e-05	0	0.000161012		A/D/E
FAM22	BRAF	7:140801502	T	C	F2	57970	17	57993	0.000293139	55262	13	55277	0.000235179	55449	21	55472	0.000378569	168681	51	168742	0.000302254	0.000225056	0.00039739	7.42636e-05	0	0.000195017		A/D/E
FAM22	BRAF	7:140801502	T	C	F3	15752	2	15757	0.000126928	14632	10	14642	0.000682967	18528	3	18532	0.000161882	48912	15	48931	0.000306579	0.0001716	0.000505605	7.78379e-05	0	0.000276038		A/D/E
FAM22	BRAF	7:140801502	T	C	F4	16243	1	16245	6.15574e-05	10602	2	10605	0.00018859	21589	3	21594	0.000138927	48434	6	48444	0.000123865	4.54574e-05	0.000269581	7.75685e-17	0	8.60762e-05		A/D/E
FAM22	BRAF	7:140801502	T	C	F5	NA	NA	NA	NA	45958	8	45970	0.000174027	2498	1	2499	0.00040016	48456	9	48469	0.000185701	8.49177e-05	0.000352489	1.40453e-16	0	0.000133258		A/D/E
FAM22	BRAF	7:140801502	T	C	F6	16693	8	16702	0.000478985	18850	2	18853	0.000106084	21393	7	21402	0.000327072	56936	17	56957	0.000298492	0.000173892	0.000477871	6.99682e-05	0	0.000252672		A/D/E
FAM22	BRAF	7:140801502	T	C	M1	60956	8	60968	0.000131216	61186	16	61209	0.000261399	76890	10	76908	0.000130025	199032	34	199085	0.000170798	0.000118285	0.000238664	1.29181e-16	0	5.93002e-05		A/D/E
FAM22	BRAF	7:140801502	T	C	M2	25556	9	25566	0.00035203	57399	8	57411	0.000139346	77199	17	77218	0.000220156	160154	34	160195	0.000212251	0.000146994	0.000296586	8.65187e-17	0	9.8459e-05		A/D/E
FAM22	BRAF	7:140801502	T	C	M3	15907	8	15915	0.00050267	19103	6	19111	0.000313955	20060	3	20065	0.000149514	55070	17	55091	0.000308603	0.000179782	0.000494057	7.98818e-05	0	0.000267691		A/D/E
FAM22	BRAF	7:140801502	T	C	M4	8990	1	8993	0.000111198	8760	0	8760	0	15894	4	15899	0.000251588	33644	5	33652	0.000148593	4.82494e-05	0.000346732	1.07831e-16	0	0.000131553		A/D/E
FAM22	BRAF	7:140801502	T	C	M5	NA	NA	NA	NA	8525	3	8528	0.000351782	42948	13	42965	0.000302572	51473	16	51493	0.000310746	0.000177628	0.000504583	8.19542e-05	0	0.000276335		A/D/E
FAM22	BRAF	7:140801502	T	C	Control1	14040	4	14045	0.000284799	18975	6	18984	0.000316056	2955	0	2955	0	35970	10	35984	0.000277932	0.000133287	0.000511068	NA	NA	NA		A/D/E
FAM22	BRAF	7:140801502	T	C	Control2	11954	3	11959	0.000250857	13413	1	13414	7.4549e-05	5849	0	5849	0	31216	4	31222	0.000128123	3.49103e-05	0.000328013	NA	NA	NA		A/D/E
FAM22	BRAF	7:140801502	T	C	Control3	7931	3	7935	0.000378072	8198	2	8200	0.000243902	22417	5	22424	0.000222975	38546	10	38559	0.000259363	0.000124381	0.000476926	NA	NA	NA		A/D/E
FAM24	AMER1	X:64192230	G	A	C1	7401	6825	14227	0.479722	7337	6734	14074	0.478471	12712	12632	25344	0.498422	27450	26191	53645	0.488265	0.484026	0.492505	0.488167	0.483937	0.492399		A
FAM24	AMER1	X:64192230	G	A	C2	13694	13333	27030	0.493267	17711	19775	37488	0.527502	11058	10777	21838	0.493498	42463	43885	86356	0.508234	0.504894	0.511574	0.50814	0.504805	0.511475		A
FAM24	AMER1	X:64192230	G	A	C7	11241	11427	22669	0.50408	13411	14230	27643	0.514778	17519	18112	35631	0.508321	42171	43769	85943	0.509297	0.505949	0.512645	0.509204	0.50586	0.512546		A
FAM24	AMER1	X:64192230	G	A	F1	41587	7	41598	0.000168277	21869	4	21873	0.000182874	36135	6	36142	0.000166012	99591	17	99613	0.000170669	9.9424e-05	0.000273244	1.29084e-16	0	0.000103801		A
FAM24	AMER1	X:64192230	G	A	F2	22326	1	22332	4.47788e-05	22503	4	22507	0.000177722	50749	13	50764	0.000256087	95578	18	95603	0.000188292	0.000111598	0.000297567	5.81594e-06	0	0.000125784		A
FAM24	AMER1	X:64192230	G	A	F3	39281	7	39291	0.000178158	8036	1	8040	0.000124378	24513	3	24519	0.000122354	71830	11	71850	0.000153116	7.64373e-05	0.00027395	1.13366e-16	0	0.000101852		A
FAM24	AMER1	X:64192230	G	A	F4	21381	0	21383	0	6760	2	6762	0.00029577	5616	1	5617	0.000178031	33757	3	33762	8.88626e-05	1.8326e-05	0.000259672	1.01944e-16	0	0.000100277		A
FAM24	AMER1	X:64192230	G	A	F5	NA	NA	NA	NA	NA	NA	NA	NA	NA	NA	NA	NA	NA	NA	NA	NA	NA	NA	NA	NA	NA		A
FAM24	AMER1	X:64192230	G	A	F6	31061	7	31070	0.000225298	19651	4	19657	0.00020349	31740	13	31755	0.000409384	82452	24	82482	0.000290994	0.000186454	0.000432945	0.000106525	0	0.000254624		A
FAM24	AMER1	X:64192230	G	A	M1	40024	3	40033	7.49382e-05	16343	3	16348	0.000183509	43883	4	43893	9.11307e-05	100250	10	100274	9.97407e-05	4.78305e-05	0.000183419	1.22061e-16	0	4.94819e-05		A
FAM24	AMER1	X:64192230	G	A	M2	6163	0	6163	0	6839	1	6841	0.000146177	4312	1	4313	0.000231857	17314	2	17317	0.0001155	1.39879e-05	0.000417163	1.41347e-16	0	0.000200043		A
FAM24	AMER1	X:64192230	G	A	M3	4810	1	4811	0.000207857	13271	1	13272	7.53466e-05	15018	0	15020	0	33099	2	33103	6.04211e-05	7.31736e-06	0.000218245	1.19569e-16	0	8.42704e-05		A
FAM24	AMER1	X:64192230	G	A	M4	2829	0	2829	0	8358	0	8360	0	10000	1	10003	9.997e-05	21187	1	21192	4.71965e-05	1.19491e-06	0.000262934	7.71984e-17	0	0.000116141		A
FAM24	AMER1	X:64192230	G	A	M5	NA	NA	NA	NA	NA	NA	NA	NA	NA	NA	NA	NA	NA	NA	NA	NA	NA	NA	NA	NA	NA		A
FAM24	AMER1	X:64192230	G	A	Control1	4913	2	4915	0.000406918	9589	0	9590	0	16916	3	16919	0.000177315	31418	5	31424	0.000159119	5.16675e-05	0.000371292	NA	NA	NA		A
FAM24	AMER1	X:64192230	G	A	Control2	12406	0	12406	0	22682	6	22689	0.000264445	13583	1	13585	7.36106e-05	48671	7	48680	0.000143802	5.78178e-05	0.000296265	NA	NA	NA		A
FAM24	AMER1	X:64192230	G	A	Control3	8557	3	8562	0.000350385	8654	2	8656	0.000231054	23338	5	23345	0.000214179	40549	10	40563	0.000246554	0.000118239	0.000453375	NA	NA	NA		A
FAM25	PURA	5:140114651	T	G	C1	8441	7181	15626	0.459555	11246	10445	21693	0.481492	13646	13036	26686	0.488496	33333	30662	64005	0.479131	0.475254	0.48301	0.479077	0.475207	0.482949		D/E
FAM25	PURA	5:140114651	T	G	C2	32252	33957	66217	0.512814	15706	14111	29820	0.473206	11543	11198	22745	0.492328	59501	59266	118782	0.499011	0.496163	0.501858	0.498958	0.496114	0.501802		D/E
FAM25	PURA	5:140114651	T	G	C7	5869	6172	12042	0.512539	13761	13497	27265	0.49503	14443	14067	28517	0.493285	34073	33736	67824	0.497515	0.493745	0.501286	0.497463	0.493699	0.501227		D/E
FAM25	PURA	5:140114651	T	G	F1	13182	3	13186	0.000227514	15754	3	15760	0.000190355	26620	4	26626	0.000150229	55556	10	55572	0.000179966	8.6304e-05	0.000330939	7.91227e-05	0	0.000220044		D/E
FAM25	PURA	5:140114651	T	G	F2	10327	0	10327	0	13726	2	13730	0.000145666	26946	5	26955	0.000185494	50999	7	51012	0.000137239	5.51788e-05	0.000282744	3.72199e-05	0	0.000170514		D/E
FAM25	PURA	5:140114651	T	G	F3	6742	3	6745	0.000444774	13796	1	13802	7.24533e-05	21546	2	21549	9.28117e-05	42084	6	42096	0.000142552	5.23157e-05	0.000310249	4.23637e-05	0	0.000193039		D/E
FAM25	PURA	5:140114651	T	G	F4	6385	1	6387	0.000156568	7537	1	7538	0.000132661	19333	1	19339	5.1709e-05	33255	3	33264	9.02039e-05	1.86026e-05	0.000263591	1.046e-16	0	0.000139488		D/E
FAM25	PURA	5:140114651	T	G	F5	5247	0	5252	0	4063	0	4064	0	17892	2	17896	0.000111757	27202	2	27212	7.35186e-05	8.90357e-06	0.000265549	1.45576e-16	0	0.000136548		D/E
FAM25	PURA	5:140114651	T	G	F6	17659	4	17665	0.000226436	24242	3	24249	0.000123716	27391	3	27399	0.000109493	69292	10	69313	0.000144296	6.91976e-05	0.000265349	4.41843e-05	0	0.000159338		D/E
FAM25	PURA	5:140114651	T	G	M1	9749	1	9752	0.000102543	13055	1	13058	7.65814e-05	26413	2	26421	7.56974e-05	49217	4	49231	8.12661e-05	2.21427e-05	0.00020806	8.6902e-17	0	9.82852e-05		D/E
FAM25	PURA	5:140114651	T	G	M2	14188	1	14191	7.04672e-05	22956	2	22963	8.70966e-05	25398	2	25407	7.87185e-05	62542	5	62561	7.99399e-05	2.59568e-05	0.000186543	8.42759e-17	0	8.30163e-05		D/E
FAM25	PURA	5:140114651	T	G	M3	15422	3	15430	0.000194426	19040	0	19044	0	22286	2	22293	8.97143e-05	56748	5	56767	8.81011e-05	2.86068e-05	0.000205586	1.00436e-16	0	9.7762e-05		D/E
FAM25	PURA	5:140114651	T	G	M4	7168	2	7172	0.000278862	11983	3	11988	0.00025025	11697	22	11720	0.00187713	30848	27	30880	0.000874494	0.000576374	0.00127209	0.000771076	0.0004771	0.00114585		D/E
FAM25	PURA	5:140114651	T	G	M5	7294	0	7295	0	10881	2	10886	0.000183722	20341	1	20346	4.91497e-05	38516	3	38527	7.78836e-05	1.60618e-05	0.000227592	8.02043e-17	0	0.000111396		D/E
FAM25	PURA	5:140114651	T	G	Control1	20570	4	20579	0.000194373	15770	2	15775	0.000126783	24308	1	24315	4.11269e-05	60648	7	60669	0.000115407	4.64007e-05	0.000237768	NA	NA	NA		D/E
FAM25	PURA	5:140114651	T	G	Control2	13210	0	13213	0	17113	2	17121	0.000116816	35728	2	35737	5.59644e-05	66051	4	66071	6.05556e-05	1.64996e-05	0.000155039	NA	NA	NA		D/E
FAM25	PURA	5:140114651	T	G	Control3	11148	0	11150	0	13703	3	13708	0.00021885	30708	4	30718	0.000130217	55559	7	55576	0.000125976	5.06505e-05	0.000259542	NA	NA	NA		D/E
FAM26	MID1	X:10459657_10459660	AACT	dupAACT	C1	103	13715	13819	0.992474	33	6614	6648	0.994886	53	16375	16437	0.996228	189	36704	36904	0.994877	0.994095	0.99558	0.994877	0.994113	0.995571		D/E
FAM26	MID1	X:10459657_10459660	AACT	dupAACT	C2	74	18508	18587	0.99575	110	15715	15827	0.992923	100	18595	18701	0.994332	284	52818	53115	0.994652	0.993994	0.995254	0.994651	0.994007	0.995248		D/E
FAM26	MID1	X:10459657_10459660	AACT	dupAACT	C7	94	22274	22372	0.99562	73	24562	24639	0.996875	111	31484	31602	0.996266	278	78320	78613	0.996463	0.996023	0.996866	0.996463	0.996031	0.996862		D/E
FAM26	MID1	X:10459657_10459660	AACT	dupAACT	F1	22916	2	22921	8.72562e-05	23561	0	23562	0	20549	1	20555	4.865e-05	67026	3	67038	4.47567e-05	9.23001e-06	0.000130793	1.43396e-16	0	5.21196e-05		D/E
FAM26	MID1	X:10459657_10459660	AACT	dupAACT	F2	16707	1	16709	5.9848e-05	13756	0	13758	0	16951	2	16955	0.000117959	47414	3	47422	6.32684e-05	1.30477e-05	0.000184886	1.25279e-16	0	8.6761e-05		D/E
FAM26	MID1	X:10459657_10459660	AACT	dupAACT	F3	27356	1	27358	3.65524e-05	27575	4	27583	0.000145017	24626	2	24632	8.11952e-05	79557	7	79573	8.79795e-05	3.5373e-05	0.000181263	1.54594e-06	0	8.91187e-05		D/E
FAM26	MID1	X:10459657_10459660	AACT	dupAACT	F4	20937	0	20941	0	21594	2	21597	9.26055e-05	22783	2	22788	8.77655e-05	65314	4	65326	6.12389e-05	1.66858e-05	0.000156788	1.2126e-16	0	6.73812e-05		D/E
FAM26	MID1	X:10459657_10459660	AACT	dupAACT	F5	NA	NA	NA	NA	NA	NA	NA	NA	NA	NA	NA	NA	NA	NA	NA	NA	NA	NA	NA	NA	NA		D/E
FAM26	MID1	X:10459657_10459660	AACT	dupAACT	F6	24858	3	24862	0.000120666	26400	6	26406	0.000227221	26412	2	26416	7.57117e-05	77670	11	77684	0.000141605	7.06906e-05	0.000253356	5.38468e-05	0	0.000159654		D/E
FAM26	MID1	X:10459657_10459660	AACT	dupAACT	M1	27134	1	27138	3.68487e-05	25018	3	25023	0.00011989	8344	2	8346	0.000239636	60496	6	60507	9.91703e-05	3.63946e-05	0.000215839	1.2344e-05	0	0.00011841		D/E
FAM26	MID1	X:10459657_10459660	AACT	dupAACT	M2	30287	2	30290	6.60284e-05	22833	6	22842	0.000262674	16211	1	16213	6.16789e-05	69331	9	69345	0.000129795	5.93523e-05	0.000246377	4.22278e-05	0	0.000151003		D/E
FAM26	MID1	X:10459657_10459660	AACT	dupAACT	M3	28711	2	28717	6.96452e-05	27501	3	27505	0.000109071	11896	1	11902	8.40195e-05	68108	6	68124	8.80876e-05	3.23273e-05	0.00019172	1.64781e-06	0	9.68352e-05		D/E
FAM26	MID1	X:10459657_10459660	AACT	dupAACT	M4	26576	4	26585	0.000150461	20345	3	20350	0.00014742	13924	3	13928	0.000215393	60845	10	60863	0.000164325	7.8803e-05	0.000302179	7.61737e-05	0	0.000204071		D/E
FAM26	MID1	X:10459657_10459660	AACT	dupAACT	M5	NA	NA	NA	NA	NA	NA	NA	NA	NA	NA	NA	NA	NA	NA	NA	NA	NA	NA	NA	NA	NA		D/E
FAM26	MID1	X:10459657_10459660	AACT	dupAACT	Control1	21356	2	21358	9.36417e-05	25519	5	25527	0.000195871	25664	2	25668	7.7918e-05	72539	9	72553	0.000124056	5.67277e-05	0.000235483	NA	NA	NA		D/E
FAM26	MID1	X:10459657_10459660	AACT	dupAACT	Control2	17736	2	17740	0.00011274	29901	2	29906	6.68762e-05	25455	2	25458	7.85608e-05	73092	6	73104	8.20816e-05	3.01231e-05	0.000178648	NA	NA	NA		D/E
FAM26	MID1	X:10459657_10459660	AACT	dupAACT	Control3	29440	3	29445	0.000101885	27472	1	27478	3.63928e-05	28985	1	28987	3.44982e-05	85897	5	85910	5.82059e-05	1.88995e-05	0.000135828	NA	NA	NA		D/E
FAM27	MECP2	X:154031022	C	delC	C1	10464	11693	22159	0.527686	9840	10706	20555	0.520847	NA	NA	NA	NA	20304	22399	42714	0.52453	0.51978	0.529276	0.524468	0.519729	0.529204		B
FAM27	MECP2	X:154031022	C	delC	C2	13937	15784	29730	0.530912	13036	14764	27809	0.530907	10143	10858	21012	0.516752	37116	41406	78551	0.527317	0.523818	0.530814	0.527256	0.523762	0.530747		B
FAM27	MECP2	X:154031022	C	delC	C7	12611	12786	25403	0.503326	9338	10119	19465	0.519856	11027	12010	23041	0.521245	32976	34915	67909	0.51428	0.510513	0.518046	0.514217	0.510456	0.517977		B
FAM27	MECP2	X:154031022	C	delC	F1	21685	0	21686	0	27432	5	27439	0.000182222	21832	0	21834	0	70949	5	70959	7.04682e-05	2.28812e-05	0.000164442	1.39536e-16	0	5.91913e-05		B
FAM27	MECP2	X:154031022	C	delC	F2	22668	3	22673	0.000132316	15917	2	15920	0.000125628	25138	4	25143	0.00015909	63723	9	63736	0.000141216	6.45751e-05	0.000268056	1.72854e-05	0	0.000139785		B
FAM27	MECP2	X:154031022	C	delC	F3	NA	NA	NA	NA	24514	2	24518	8.15727e-05	13974	0	13975	0	38488	2	38493	5.19615e-05	6.29285e-06	0.00018769	9.24651e-17	0	7.84202e-05		B
FAM27	MECP2	X:154031022	C	delC	F4	24491	1	24495	4.08247e-05	28307	4	28314	0.000141273	28878	2	28881	6.92497e-05	81676	7	81690	8.56971e-05	3.44554e-05	0.000176561	9.5676e-17	0	6.49186e-05		B
FAM27	MECP2	X:154031022	C	delC	F5	NA	NA	NA	NA	NA	NA	NA	NA	NA	NA	NA	NA	NA	NA	NA	NA	NA	NA	NA	NA	NA		B
FAM27	MECP2	X:154031022	C	delC	F6	26902	68	26973	0.00252104	20212	58	20270	0.00286137	28919	57	28977	0.00196708	76033	183	76220	0.00240107	0.00206611	0.00277476	0.00227175	0.00193521	0.00264035		B
FAM27	MECP2	X:154031022	C	delC	M1	21181	2	21183	9.44153e-05	18181	3	18185	0.000164971	22442	9	22452	0.000400855	61804	14	61820	0.000226471	0.000123819	0.000379951	0.000100664	0	0.000248993		B
FAM27	MECP2	X:154031022	C	delC	M2	20089	4	20096	0.000199045	17637	0	17638	0	20942	7	20952	0.000334097	58668	11	58686	0.000187461	9.35832e-05	0.000335394	6.23212e-05	0	0.000204106		B
FAM27	MECP2	X:154031022	C	delC	M3	24250	0	24256	0	30436	3	30442	9.85481e-05	26450	2	26456	7.55972e-05	81136	5	81154	6.16211e-05	2.00085e-05	0.000143797	1.22017e-16	0	4.83238e-05		B
FAM27	MECP2	X:154031022	C	delC	M4	NA	NA	NA	NA	NA	NA	NA	NA	51144	3	51154	5.86464e-05	51144	3	51154	5.86545e-05	1.20961e-05	0.000171404	1.13909e-16	0	6.64108e-05		B
FAM27	MECP2	X:154031022	C	delC	M5	20356	4	20361	0.000196454	16640	0	16642	0	20965	1	20968	4.76917e-05	57961	5	57971	8.62575e-05	2.80081e-05	0.000201285	9.67855e-17	0	8.15043e-05		B
FAM27	MECP2	X:154031022	C	delC	Control1	18664	2	18667	0.000107141	18399	5	18404	0.00027168	17429	1	17430	5.73723e-05	54492	8	54501	0.000146789	6.33751e-05	0.000289212	NA	NA	NA		B
FAM27	MECP2	X:154031022	C	delC	Control2	NA	NA	NA	NA	16111	2	16116	0.0001241	22250	2	22253	8.98755e-05	38361	4	38369	0.000104262	2.84085e-05	0.00026693	NA	NA	NA		B
FAM27	MECP2	X:154031022	C	delC	Control3	20078	2	20081	9.95966e-05	17972	3	17976	0.000166889	15057	1	15059	6.64055e-05	53107	6	53116	0.000112967	4.14579e-05	0.000245865	NA	NA	NA		B
FAM28	KMT2A	11:118473689	C	T	C1	9470	8560	18038	0.474554	6115	6305	12425	0.507445	6563	6307	12879	0.489712	22148	21172	43342	0.488735	0.484017	0.493454	0.488685	0.483978	0.493393		A/D/E
FAM28	KMT2A	11:118473689	C	T	C2	8925	8781	17721	0.495514	11425	10307	21751	0.473863	8995	8283	17290	0.479063	29345	27371	56762	0.482598	0.478477	0.48672	0.482547	0.478435	0.486661		A/D/E
FAM28	KMT2A	11:118473689	C	T	C7	6023	6343	12368	0.512856	12041	11722	23765	0.493246	14892	13581	28475	0.476945	32956	31646	64608	0.489861	0.485999	0.493724	0.489811	0.485956	0.493667		A/D/E
FAM28	KMT2A	11:118473689	C	T	F1	18888	3	18893	0.000158789	9926	3	9930	0.000302115	6738	0	6738	0	35552	6	35561	0.000168738	6.19265e-05	0.000367236	7.43039e-05	0	0.000250952		A/D/E
FAM28	KMT2A	11:118473689	C	T	F2	16357	1	16358	6.11322e-05	15406	1	15407	6.49056e-05	12964	1	12965	7.71307e-05	44727	3	44730	6.70691e-05	1.38315e-05	0.000195992	1.32805e-16	0	9.22331e-05		A/D/E
FAM28	KMT2A	11:118473689	C	T	F3	17114	2	17118	0.000116836	24830	2	24835	8.05315e-05	10857	0	10860	0	52801	4	52813	7.57504e-05	2.06398e-05	0.00019394	7.59802e-17	0	9.17592e-05		A/D/E
FAM28	KMT2A	11:118473689	C	T	F4	21823	1	21824	4.58211e-05	15449	0	15449	0	12293	1	12295	8.13339e-05	49565	2	49568	4.03494e-05	4.88654e-06	0.000145748	1.29276e-16	0	6.17762e-05		A/D/E
FAM28	KMT2A	11:118473689	C	T	F5	20035	0	20036	0	10463	2	10465	0.000191113	13487	0	13487	0	43985	2	43988	4.5468e-05	5.50643e-06	0.000164236	1.45675e-16	0	7.23911e-05		A/D/E
FAM28	KMT2A	11:118473689	C	T	F6	20610	2	20613	9.70261e-05	21263	3	21268	0.000141057	27328	2	27330	7.31797e-05	69201	7	69211	0.000101144	4.06662e-05	0.000208385	8.5477e-06	0	0.000109237		A/D/E
FAM28	KMT2A	11:118473689	C	T	M1	13235	0	13240	0	9860	2	9862	0.000202799	14427	1	14429	6.93049e-05	37522	3	37531	7.99467e-05	1.64872e-05	0.00023362	8.42894e-17	0	0.000120382		A/D/E
FAM28	KMT2A	11:118473689	C	T	M2	12919	3	12922	0.000232162	10266	3	10269	0.000292141	15578	0	15579	0	38763	6	38770	0.000154763	5.67973e-05	0.000336823	6.05994e-05	0	0.000223188		A/D/E
FAM28	KMT2A	11:118473689	C	T	M3	12384	0	12384	0	10263	0	10263	0	21192	3	21197	0.000141529	43839	3	43844	6.84275e-05	1.41116e-05	0.000199961	1.35495e-16	0	9.50543e-05		A/D/E
FAM28	KMT2A	11:118473689	C	T	M4	8267	2	8269	0.000241867	14397	1	14398	6.94541e-05	19824	8	19834	0.000403348	42488	11	42501	0.00025883	0.000129214	0.00046307	0.000163414	2.95367e-05	0.000351615		A/D/E
FAM28	KMT2A	11:118473689	C	T	M5	10552	1	10554	9.47508e-05	12606	1	12609	7.93084e-05	13790	0	13793	0	36948	2	36956	5.41272e-05	6.55512e-06	0.000195512	9.94036e-17	0	9.17015e-05		A/D/E
FAM28	KMT2A	11:118473689	C	T	Control1	27993	2	27998	7.14337e-05	25763	0	25765	0	11446	0	11448	0	65202	2	65211	3.0673e-05	3.71466e-06	0.000110797	NA	NA	NA		A/D/E
FAM28	KMT2A	11:118473689	C	T	Control2	15579	2	15581	0.000128361	12354	1	12355	8.09389e-05	22901	1	22904	4.36605e-05	50834	4	50840	7.86813e-05	2.14384e-05	0.000201443	NA	NA	NA		A/D/E
FAM28	KMT2A	11:118473689	C	T	Control3	24703	2	24706	8.0952e-05	22111	4	22116	0.000180865	21429	5	21435	0.000233263	68243	11	68257	0.000161163	8.04545e-05	0.000288346	NA	NA	NA		A/D/E
FAM30	CALM2	2:47161756	C	A	C1	424	458	882	0.519274	516	524	1040	0.503846	461	481	942	0.510616	1401	1463	2864	0.510824	0.492339	0.529287	0.510624	0.492306	0.528924		A
FAM30	CALM2	2:47161756	C	A	C2	763	865	1628	0.531327	612	625	1238	0.504847	539	563	1102	0.510889	1914	2053	3968	0.51752	0.501836	0.533177	0.517323	0.501759	0.532864		A
FAM30	CALM2	2:47161756	C	A	C7	18852	17833	36687	0.486085	21111	20944	42059	0.497967	18118	17155	35275	0.486322	58081	55932	114021	0.490576	0.48767	0.493482	0.490368	0.487464	0.493272		A
FAM30	CALM2	2:47161756	C	A	F1	14548	9	14558	0.000618217	19900	1	19903	5.02437e-05	15359	12	15372	0.00078064	49807	22	49833	0.00044151	0.000276712	0.000668376	4.20117e-05	0	0.000277481		A
FAM30	CALM2	2:47161756	C	A	F2	16825	3	16840	0.000178147	20265	11	20277	0.000542487	19861	12	19874	0.000603804	56951	26	56991	0.000456324	0.000298107	0.00066855	5.66676e-05	0	0.000281307		A
FAM30	CALM2	2:47161756	C	A	F3	30445	7	30452	0.00022987	18073	7	18081	0.000387147	32078	14	32094	0.000436219	80596	28	80627	0.000347291	0.000230784	0.000501894	8.83241e-17	0	0.000135937		A
FAM30	CALM2	2:47161756	C	A	F4	3140	1	3141	0.00031837	4597	0	4597	0	765	0	765	0	8502	1	8503	0.000117606	2.97751e-06	0.00065508	1.43924e-16	0	0.000293303		A
FAM30	CALM2	2:47161756	C	A	F5	NA	NA	NA	NA	NA	NA	NA	NA	NA	NA	NA	NA	NA	NA	NA	NA	NA	NA	NA	NA	NA		A
FAM30	CALM2	2:47161756	C	A	F6	17063	7	17071	0.000410052	23102	6	23108	0.00025965	1672	0	1672	0	41837	13	41851	0.000310633	0.000165409	0.000531134	1.45204e-16	0	0.000158849		A
FAM30	CALM2	2:47161756	C	A	M1	6909	6	6915	0.000867679	8609	1	8610	0.000116144	16001	3	16004	0.000187453	31519	10	31529	0.000317168	0.000152105	0.000583206	7.42434e-17	0	0.000195803		A
FAM30	CALM2	2:47161756	C	A	M2	14691	7	14700	0.00047619	19341	8	19350	0.000413437	14823	6	14832	0.000404531	48855	21	48882	0.000429659	0.000265985	0.000656704	3.03171e-05	0	0.000265523		A
FAM30	CALM2	2:47161756	C	A	M3	15377	3	15380	0.000195059	15633	6	15640	0.000383632	11581	2	11584	0.000172652	42591	11	42604	0.000258204	0.000128901	0.000461951	1.20696e-16	0	0.000122233		A
FAM30	CALM2	2:47161756	C	A	M4	17408	8	17416	0.000459348	21952	14	21968	0.000637291	21396	10	21407	0.000467137	60756	32	60791	0.00052642	0.000360098	0.000743067	0.000126029	0	0.000355898		A
FAM30	CALM2	2:47161756	C	A	M5	5953	5	5958	0.000839208	5679	4	5684	0.00070373	9140	4	9145	0.000437397	20772	13	20787	0.000625451	0.000333067	0.0010693	0.000223727	0	0.000640656		A
FAM30	CALM2	2:47161756	C	A	Control1	966	1	967	0.00103413	3369	1	3370	0.000296736	10003	6	10010	0.000599401	14338	8	14347	0.000557647	0.000240782	0.00109849	NA	NA	NA		A
FAM30	CALM2	2:47161756	C	A	Control2	14110	3	14114	0.000212555	21033	9	21043	0.000427696	28174	10	28185	0.000354799	63317	22	63342	0.000347337	0.000217687	0.000525826	NA	NA	NA		A
FAM30	CALM2	2:47161756	C	A	Control3	31289	14	31303	0.000447241	537	0	537	0	779	0	779	0	32605	14	32619	0.000429198	0.000234666	0.000720016	NA	NA	NA		A
FAM31	SYNGAP1	6:33437770_33437776	TGTATGC	delTGTATGC	C1	10633	9802	20437	0.47962	10212	9865	20079	0.491309	8846	9344	18206	0.513237	29691	29011	58722	0.494208	0.490155	0.498261	0.494192	0.490148	0.498237		A
FAM31	SYNGAP1	6:33437770_33437776	TGTATGC	delTGTATGC	C2	5975	5678	11658	0.487048	4244	4505	8751	0.514798	4767	4691	9460	0.495877	14986	14874	29869	0.498125	0.492437	0.503812	0.498109	0.492438	0.50378		A
FAM31	SYNGAP1	6:33437770_33437776	TGTATGC	delTGTATGC	C7	16748	16245	32998	0.492303	12801	13167	25970	0.507008	20254	19235	39491	0.487073	49803	48647	98459	0.494129	0.491001	0.497257	0.494113	0.49099	0.497236		A
FAM31	SYNGAP1	6:33437770_33437776	TGTATGC	delTGTATGC	F1	28321	0	28324	0	26189	0	26193	0	43579	1	43587	2.29426e-05	98089	1	98104	1.01947e-05	2.58108e-07	5.68e-05	1.38362e-16	0	2.72653e-05		A
FAM31	SYNGAP1	6:33437770_33437776	TGTATGC	delTGTATGC	F2	16764	0	16768	0	21108	1	21114	4.73619e-05	36670	0	36675	0	74542	1	74557	1.34151e-05	3.3964e-07	7.47417e-05	1.08054e-16	0	3.79264e-05		A
FAM31	SYNGAP1	6:33437770_33437776	TGTATGC	delTGTATGC	F3	24894	0	24896	0	31645	0	31647	0	41753	1	41759	2.39469e-05	98292	1	98302	1.01737e-05	2.57575e-07	5.66827e-05	1.38077e-16	0	2.71984e-05		A
FAM31	SYNGAP1	6:33437770_33437776	TGTATGC	delTGTATGC	F4	35656	1	35660	2.80426e-05	40313	0	40319	0	39220	1	39225	2.54939e-05	115189	2	115204	1.73625e-05	2.10268e-06	6.27178e-05	1.45635e-16	0	3.05714e-05		A
FAM31	SYNGAP1	6:33437770_33437776	TGTATGC	delTGTATGC	F5	NA	NA	NA	NA	NA	NA	NA	NA	NA	NA	NA	NA	NA	NA	NA	NA	NA	NA	NA	NA	NA		A
FAM31	SYNGAP1	6:33437770_33437776	TGTATGC	delTGTATGC	F6	28898	2	28901	6.92018e-05	36000	1	36006	2.77731e-05	40440	1	40450	2.47219e-05	105338	4	105357	3.79716e-05	1.03461e-05	9.72194e-05	8.73709e-06	0	6.07312e-05		A
FAM31	SYNGAP1	6:33437770_33437776	TGTATGC	delTGTATGC	M1	30998	2	31005	6.45057e-05	22854	0	22860	0	28263	1	28266	3.53782e-05	82115	3	82131	3.65328e-05	7.534e-06	0.000106761	7.35138e-06	0	6.68895e-05		A
FAM31	SYNGAP1	6:33437770_33437776	TGTATGC	delTGTATGC	M2	25297	0	25301	0	15074	0	15079	0	17091	0	17094	0	57462	0	57474	0	0	6.41948e-05	0	0	2.35417e-05		A
FAM31	SYNGAP1	6:33437770_33437776	TGTATGC	delTGTATGC	M3	29082	0	29086	0	28909	2	28914	6.91706e-05	21337	0	21339	0	79328	2	79339	2.52111e-05	3.0532e-06	9.10683e-05	1.30695e-16	0	5.08775e-05		A
FAM31	SYNGAP1	6:33437770_33437776	TGTATGC	delTGTATGC	M4	18377	0	18380	0	17567	0	17572	0	22866	1	22870	4.37254e-05	58810	1	58822	1.70036e-05	4.30494e-07	9.47344e-05	1.42625e-16	0	5.07253e-05		A
FAM31	SYNGAP1	6:33437770_33437776	TGTATGC	delTGTATGC	M5	26274	1	26277	3.80561e-05	30758	1	30760	3.25098e-05	31865	0	31867	0	88897	2	88904	2.24974e-05	2.72456e-06	8.12661e-05	1.14692e-16	0	4.34677e-05		A
FAM31	SYNGAP1	6:33437770_33437776	TGTATGC	delTGTATGC	Control1	38200	0	38205	0	23765	0	23769	0	29243	3	29250	0.000102564	91208	3	91224	3.28908e-05	6.78292e-06	9.61177e-05	NA	NA	NA		A
FAM31	SYNGAP1	6:33437770_33437776	TGTATGC	delTGTATGC	Control2	33237	0	33240	0	35946	2	35953	5.56282e-05	38401	1	38409	2.60356e-05	107584	3	107602	2.78844e-05	5.75047e-06	8.14879e-05	NA	NA	NA		A
FAM31	SYNGAP1	6:33437770_33437776	TGTATGC	delTGTATGC	Control3	28402	2	28411	7.03953e-05	41466	0	41473	0	45833	1	45840	2.1815e-05	115701	3	115724	2.59282e-05	5.34706e-06	7.57714e-05	NA	NA	NA		A
FAM32	TP63	3:189890806	G	T	C1	18026	18923	36950	0.512124	13064	13188	26258	0.502247	17301	18331	35636	0.514396	48391	50442	98844	0.510376	0.507254	0.513497	0.5103	0.507183	0.513417		A
FAM32	TP63	3:189890806	G	T	C2	12808	13556	26365	0.514167	12762	13045	25811	0.505405	13140	14639	27782	0.526924	38710	41240	79958	0.515822	0.512352	0.519292	0.515747	0.512282	0.519211		A
FAM32	TP63	3:189890806	G	T	C7	10526	11390	21919	0.51964	5686	6104	11792	0.517639	5290	5532	10823	0.511134	21502	23026	44534	0.517113	0.512459	0.521764	0.517038	0.512395	0.521679		A
FAM32	TP63	3:189890806	G	T	F1	9061	2	9063	0.000220677	3752	3	3755	0.000798935	2907	0	2907	0	15720	5	15725	0.000317965	0.00010325	0.000741867	0.000167237	0	0.000536838		A
FAM32	TP63	3:189890806	G	T	F2	7452	1	7453	0.000134174	5866	1	5867	0.000170445	6494	0	6494	0	19812	2	19814	0.000100939	1.22244e-05	0.000364577	1.23527e-16	0	0.000182374		A
FAM32	TP63	3:189890806	G	T	F3	9488	0	9489	0	11002	1	11003	9.08843e-05	8590	0	8590	0	29080	1	29082	3.43867e-05	8.70596e-07	0.000191575	1.04247e-16	0	8.39722e-05		A
FAM32	TP63	3:189890806	G	T	F4	14926	0	14928	0	13509	2	13511	0.000148028	8024	1	8026	0.000124595	36459	3	36465	8.22774e-05	1.69679e-05	0.000240431	8.89046e-17	0	0.000100691		A
FAM32	TP63	3:189890806	G	T	F5	12834	3	12839	0.000233663	20097	3	20100	0.000149254	12691	3	12695	0.000236314	45622	9	45634	0.000197234	9.01919e-05	0.000374379	4.92584e-05	0	0.000217979		A
FAM32	TP63	3:189890806	G	T	F6	15499	1	15501	6.4512e-05	13526	2	13528	0.000147842	9813	0	9816	0	38838	3	38845	7.7238e-05	1.59286e-05	0.000225705	7.89258e-17	0	9.20192e-05		A
FAM32	TP63	3:189890806	G	T	M1	5320	5	5326	0.000938791	3391	0	3391	0	4909	0	4909	0	13620	5	13626	0.000366972	0.000119165	0.000856182	0.000215653	0	0.000641024		A
FAM32	TP63	3:189890806	G	T	M2	8423	7	8430	0.000830368	7309	1	7310	0.000136799	10904	2	10906	0.000183385	26636	10	26646	0.000375291	0.000179981	0.000690065	0.000224108	2.00438e-05	0.000513392		A
FAM32	TP63	3:189890806	G	T	M3	13881	1	13886	7.2015e-05	9881	1	9882	0.000101194	11480	0	11481	0	35242	2	35249	5.67472e-05	6.87243e-06	0.000204975	1.07798e-16	0	8.40625e-05		A
FAM32	TP63	3:189890806	G	T	M4	6598	0	6599	0	4722	1	4723	0.00021173	4330	0	4330	0	15650	1	15652	6.38937e-05	1.61765e-06	0.000355941	1.26517e-16	0	0.000175744		A
FAM32	TP63	3:189890806	G	T	M5	7899	0	7899	0	13336	1	13337	7.49794e-05	14671	1	14673	6.81524e-05	35906	2	35909	5.56979e-05	6.74534e-06	0.000201185	1.04436e-16	0	8.2068e-05		A
FAM32	TP63	3:189890806	G	T	Control1	17993	3	17996	0.000166704	13694	0	13694	0	3925	0	3925	0	35612	3	35615	8.42342e-05	1.73714e-05	0.000246148	NA	NA	NA		A
FAM32	TP63	3:189890806	G	T	Control2	13945	2	13949	0.000143379	12635	0	12637	0	12234	3	12237	0.000245158	38814	5	38823	0.000128803	4.18232e-05	0.000300557	NA	NA	NA		A
FAM32	TP63	3:189890806	G	T	Control3	11616	6	11622	0.000516262	13734	2	13736	0.000145603	9656	0	9656	0	35006	8	35014	0.00022848	9.86465e-05	0.000450147	NA	NA	NA		A
FAM33	KRT5	12:52516655	A	G	C1	12467	1072	13540	0.0791728	16278	1357	17638	0.0769362	22523	2027	24553	0.0825561	51268	4456	55731	0.0799655	0.0777264	0.0822485	0.07984	0.0776066	0.0821119		G
FAM33	KRT5	12:52516655	A	G	C2	41003	4281	45292	0.09452	17929	2116	20045	0.105562	22898	2512	25413	0.098847	81830	8909	90750	0.0981827	0.096254	0.100137	0.0980596	0.0961343	0.100008		G
FAM33	KRT5	12:52516655	A	G	C7	27150	20325	47485	0.42803	24394	16610	41015	0.404974	24263	17044	41325	0.412438	75807	53979	129825	0.415908	0.413224	0.418595	0.415828	0.413148	0.418512		G
FAM33	KRT5	12:52516655	A	G	F1	12214	2	12216	0.00016372	9157	2	9159	0.000218364	11440	1	11441	8.74049e-05	32811	5	32816	0.000152365	4.94742e-05	0.000355532	1.82604e-05	0	0.000195781		G
FAM33	KRT5	12:52516655	A	G	F2	676	1	677	0.0014771	613	1	614	0.00162866	1659	2	1661	0.00120409	2948	4	2952	0.00135501	0.000369315	0.00346571	0.00121897	0.000283793	0.0030094		G
FAM33	KRT5	12:52516655	A	G	F3	33314	5	33319	0.000150065	42866	6	42874	0.000139945	60290	8	60302	0.000132666	136470	19	136495	0.000139205	8.38127e-05	0.000217378	5.32456e-06	0	8.47155e-05		G
FAM33	KRT5	12:52516655	A	G	F4	24811	5	24819	0.000201459	32085	3	32089	9.349e-05	45297	3	45301	6.62237e-05	102193	11	102209	0.000107628	5.37286e-05	0.000192568	1.31713e-16	0	6.26269e-05		G
FAM33	KRT5	12:52516655	A	G	F5	24721	2	24723	8.08963e-05	37262	4	37268	0.000107331	15637	1	15639	6.39427e-05	77620	7	77630	9.01748e-05	3.62557e-05	0.000185786	1.04542e-16	0	6.06132e-05		G
FAM33	KRT5	12:52516655	A	G	F6	26688	5	26694	0.000187308	46569	7	46579	0.000150282	37926	2	37933	5.27245e-05	111183	14	111206	0.000125903	6.88338e-05	0.000211234	8.00627e-17	0	7.70736e-05		G
FAM33	KRT5	12:52516655	A	G	M1	19119	4	19124	0.000209161	17620	1	17622	5.67472e-05	16941	2	16944	0.000118036	53680	7	53690	0.000130385	5.24232e-05	0.000268625	8.55486e-17	0	0.000122259		G
FAM33	KRT5	12:52516655	A	G	M2	24405	4	24409	0.000163874	26688	9	26702	0.000337053	24920	3	24925	0.000120361	76013	16	76036	0.000210446	0.000120293	0.000341729	7.57915e-05	0	0.00020075		G
FAM33	KRT5	12:52516655	A	G	M3	21758	4	21766	0.000183773	21877	2	21879	9.14119e-05	42924	4	42931	9.31728e-05	86559	10	86576	0.000115515	5.53952e-05	0.000212426	1.41365e-16	0	7.71895e-05		G
FAM33	KRT5	12:52516655	A	G	M4	42952	7	42960	0.000162942	48234	3	48237	6.21929e-05	35312	7	35319	0.000198194	126498	17	126516	0.000134371	7.82782e-05	0.000215133	5.5837e-07	0	8.17666e-05		G
FAM33	KRT5	12:52516655	A	G	M5	33627	6	33635	0.000178386	38898	4	38905	0.000102815	45385	3	45390	6.60939e-05	117910	13	117930	0.000110241	5.87002e-05	0.000188509	1.34912e-16	0	5.94225e-05		G
FAM33	KRT5	12:52516655	A	G	Control1	52587	3	52593	5.70418e-05	52793	8	52803	0.000151507	28550	7	28559	0.000245107	133930	18	133955	0.000134381	7.96443e-05	0.000212371	NA	NA	NA		G
FAM33	KRT5	12:52516655	A	G	Control2	38625	3	38628	7.76639e-05	49274	8	49284	0.000162324	37839	2	37843	5.28499e-05	125738	13	125755	0.000103379	5.5046e-05	0.000176775	NA	NA	NA		G
FAM33	KRT5	12:52516655	A	G	Control3	35068	7	35077	0.000199561	38473	5	38479	0.000129941	40419	7	40428	0.000173147	113960	19	113984	0.000166697	0.000100366	0.000260306	NA	NA	NA		G
FAM34	KCNQ2	20:63407094_63407101	GTGGCTCT	delGTGGCTCT	C1	10387	10480	20868	0.502204	11476	12090	23566	0.513027	14152	16780	30933	0.542463	36015	39350	75367	0.522126	0.518552	0.525698	0.522105	0.518538	0.52567		C
FAM34	KCNQ2	20:63407094_63407101	GTGGCTCT	delGTGGCTCT	C2	16716	16880	33596	0.502441	15316	18142	33460	0.5422	19554	23446	43000	0.545256	51586	58468	110056	0.531266	0.528313	0.534218	0.531246	0.528297	0.534194		C
FAM34	KCNQ2	20:63407094_63407101	GTGGCTCT	delGTGGCTCT	C7	20506	22918	43424	0.527773	26082	27718	53801	0.515195	33915	38076	71996	0.528863	80503	88712	169221	0.524256	0.521873	0.526638	0.524235	0.521855	0.526615		C
FAM34	KCNQ2	20:63407094_63407101	GTGGCTCT	delGTGGCTCT	F1	21328	174	21504	0.00809152	29017	245	29265	0.00837178	61885	551	62439	0.00882461	112230	970	113208	0.0085689	0.00804018	0.00912304	0.00852556	0.00799928	0.00907404		C
FAM34	KCNQ2	20:63407094_63407101	GTGGCTCT	delGTGGCTCT	F2	17018	101	17119	0.00589988	46210	261	46472	0.00561629	58944	391	59338	0.00658937	122172	753	122929	0.00612569	0.00569712	0.0065778	0.00608224	0.00565578	0.00652922		C
FAM34	KCNQ2	20:63407094_63407101	GTGGCTCT	delGTGGCTCT	F3	21681	1108	22791	0.0486157	32094	1585	33683	0.0470564	64437	3445	67887	0.0507461	118212	6138	124361	0.0493607	0.0481632	0.0505792	0.0493191	0.0481242	0.0505326		C
FAM34	KCNQ2	20:63407094_63407101	GTGGCTCT	delGTGGCTCT	F4	3874	113	3987	0.0283421	30033	1524	31558	0.048292	36896	1554	38451	0.0404151	70803	3191	73996	0.0431251	0.0416726	0.0446136	0.0430833	0.0416352	0.044563		C
FAM34	KCNQ2	20:63407094_63407101	GTGGCTCT	delGTGGCTCT	F5	20470	647	21121	0.030633	34569	900	35470	0.0253736	33200	901	34105	0.0264184	88239	2448	90696	0.0269939	0.0259488	0.0280695	0.0269514	0.0259097	0.0280198		C
FAM34	KCNQ2	20:63407094_63407101	GTGGCTCT	delGTGGCTCT	F6	14993	1583	16576	0.0954995	35852	3106	38960	0.0797228	46575	3901	50486	0.0772689	97420	8590	106022	0.0810301	0.0793942	0.082689	0.0809899	0.0793572	0.0826429		C
FAM34	KCNQ2	20:63407094_63407101	GTGGCTCT	delGTGGCTCT	M1	38528	4	38535	0.000103802	19750	1	19751	5.06303e-05	49846	3	49850	6.01805e-05	108124	8	108136	7.39836e-05	3.19414e-05	0.000145772	3.17551e-05	0	9.74805e-05		C
FAM34	KCNQ2	20:63407094_63407101	GTGGCTCT	delGTGGCTCT	M2	36842	0	36844	0	22023	1	22028	4.53968e-05	48587	3	48593	6.17373e-05	107452	4	107465	3.72245e-05	1.01425e-05	9.53068e-05	1.18958e-16	0	4.77278e-05		C
FAM34	KCNQ2	20:63407094_63407101	GTGGCTCT	delGTGGCTCT	M3	43046	1	43050	2.32288e-05	31229	3	31237	9.604e-05	60335	4	60345	6.62855e-05	134610	8	134632	5.94274e-05	2.56569e-05	0.000117092	1.7525e-05	0	7.11384e-05		C
FAM34	KCNQ2	20:63407094_63407101	GTGGCTCT	delGTGGCTCT	M4	44081	1	44087	2.26824e-05	53370	7	53379	0.000131138	54348	6	54355	0.000110385	151799	14	151821	9.22187e-05	5.04177e-05	0.000154723	4.9778e-05	3.79841e-06	0.000109289		C
FAM34	KCNQ2	20:63407094_63407101	GTGGCTCT	delGTGGCTCT	M5	17875	2	17878	0.000111869	15078	2	15081	0.000132617	17451	1	17453	5.72967e-05	50404	5	50412	9.91886e-05	3.2207e-05	0.000231458	5.65557e-05	0	0.000171577		C
FAM34	KCNQ2	20:63407094_63407101	GTGGCTCT	delGTGGCTCT	Control1	45081	4	45087	8.87174e-05	58179	1	58181	1.71877e-05	63726	2	63735	3.13799e-05	166986	7	167003	4.19179e-05	1.68533e-05	8.6365e-05	NA	NA	NA		C
FAM34	KCNQ2	20:63407094_63407101	GTGGCTCT	delGTGGCTCT	Control2	14835	1	14838	6.73945e-05	42465	1	42472	2.35449e-05	62558	2	62566	3.19662e-05	119858	4	119876	3.33717e-05	9.09274e-06	8.54426e-05	NA	NA	NA		C
FAM34	KCNQ2	20:63407094_63407101	GTGGCTCT	delGTGGCTCT	Control3	40623	1	40630	2.46124e-05	39138	2	39143	5.10947e-05	44961	3	44970	6.67111e-05	124722	6	124743	4.81047e-05	1.76538e-05	0.000104701	NA	NA	NA		C
FAM35	SATB2	2:199349042	G	delG	C1	16254	16133	32390	0.498086	11345	11143	22492	0.495421	13863	14407	28276	0.509513	41462	41683	83158	0.501329	0.497924	0.504734	0.501285	0.497886	0.504684		A
FAM35	SATB2	2:199349042	G	delG	C2	17085	18263	35354	0.516575	14670	15503	30181	0.513668	13691	14189	27882	0.508895	45446	47955	93417	0.513431	0.51022	0.516642	0.513388	0.510182	0.516594		A
FAM35	SATB2	2:199349042	G	delG	C7	15118	15276	30401	0.502483	13883	13754	27641	0.497594	15876	16485	32368	0.509299	44877	45515	90410	0.503529	0.500264	0.506794	0.503485	0.500225	0.506745		A
FAM35	SATB2	2:199349042	G	delG	F1	27181	3	27186	0.000110351	32702	2	32710	6.11434e-05	17511	2	17516	0.000114181	77394	7	77412	9.04381e-05	3.63616e-05	0.000186328	5.70691e-06	0	9.46365e-05		A
FAM35	SATB2	2:199349042	G	delG	F2	40791	6	40804	0.000147044	38779	4	38789	0.000103122	27859	8	27870	0.000287047	107429	18	107463	0.000167524	9.92885e-05	0.000264748	8.14815e-05	5.06652e-06	0.000176139		A
FAM35	SATB2	2:199349042	G	delG	F3	32316	4	32323	0.000123751	25983	2	25994	7.69408e-05	24453	1	24458	4.08864e-05	82752	7	82775	8.45829e-05	3.40074e-05	0.000174265	3.89455e-08	0	8.37847e-05		A
FAM35	SATB2	2:199349042	G	delG	F4	22207	1	22213	4.50187e-05	32037	3	32049	9.36067e-05	29669	2	29673	6.74013e-05	83913	6	83935	7.14975e-05	2.62388e-05	0.000155613	1.41574e-16	0	6.73516e-05		A
FAM35	SATB2	2:199349042	G	delG	F5	304	0	304	0	NA	NA	NA	NA	240	1	241	0.00414938	544	1	545	0.0018315	4.63685e-05	0.0101619	0.00174361	1.65536e-05	0.00795171		A
FAM35	SATB2	2:199349042	G	delG	F6	9131	1	9133	0.000109493	8855	2	8858	0.000225785	14924	2	14929	0.000133967	32910	5	32920	0.000151906	4.93254e-05	0.000354463	6.58565e-05	0	0.000242501		A
FAM35	SATB2	2:199349042	G	delG	M1	15488	4	15493	0.000258181	14183	2	14187	0.000140974	20028	1	20029	4.99276e-05	49699	7	49709	0.000140828	5.6622e-05	0.000290138	5.49771e-05	0	0.000189472		A
FAM35	SATB2	2:199349042	G	delG	M2	32606	4	32615	0.000122643	24995	4	25002	0.000159987	36021	3	36031	8.32616e-05	93622	11	93648	0.00011748	5.8647e-05	0.000210194	3.2118e-05	0	0.000120734		A
FAM35	SATB2	2:199349042	G	delG	M3	13234	1	13238	7.55401e-05	16840	1	16842	5.93754e-05	20684	4	20691	0.000193321	50758	6	50771	0.000118194	4.33763e-05	0.000257241	3.27368e-05	0	0.00015712		A
FAM35	SATB2	2:199349042	G	delG	M4	24178	22	24204	0.000908941	25637	2	25640	7.80031e-05	35924	6	35933	0.000166977	85739	30	85777	0.000349777	0.000236005	0.000499291	0.000262687	0.000145689	0.000406667		A
FAM35	SATB2	2:199349042	G	delG	M5	NA	NA	NA	NA	NA	NA	NA	NA	NA	NA	NA	NA	NA	NA	NA	NA	NA	NA	NA	NA	NA		A
FAM35	SATB2	2:199349042	G	delG	Control1	25096	0	25099	0	37263	2	37270	5.36625e-05	35016	3	35024	8.56556e-05	97375	5	97393	5.13452e-05	1.66719e-05	0.000119819	NA	NA	NA		A
FAM35	SATB2	2:199349042	G	delG	Control2	38573	3	38579	7.77625e-05	27322	5	27329	0.000182956	33017	1	33025	3.02801e-05	98912	9	98933	9.09817e-05	4.16034e-05	0.000172705	NA	NA	NA		A
FAM35	SATB2	2:199349042	G	delG	Control3	28766	4	28782	0.000138976	23471	4	23478	0.000170372	23504	1	23506	4.25423e-05	75741	9	75766	0.000118812	5.43298e-05	0.00022553	NA	NA	NA		A
FAM36	FLNB	3:58078789	C	G	C1	1864	2525	4394	0.574647	2064	1882	3947	0.476818	1894	2007	3905	0.513956	5822	6414	12246	0.524191	0.515296	0.533074	0.524138	0.515284	0.532983		A/D/E
FAM36	FLNB	3:58078789	C	G	C2	8883	9290	18187	0.510804	8058	8101	16174	0.500866	9884	9851	19757	0.498608	26825	27242	54118	0.503856	0.499633	0.50808	0.503802	0.499586	0.508016		A/D/E
FAM36	FLNB	3:58078789	C	G	C7	8680	8512	17208	0.494654	8717	8550	17281	0.494763	6367	6569	12949	0.507298	23764	23631	47438	0.498597	0.494085	0.503109	0.498542	0.49404	0.503044		A/D/E
FAM36	FLNB	3:58078789	C	G	F1	1213	0	1213	0	1516	1	1517	0.000659196	838	0	838	0	3567	1	3568	0.000280269	7.09577e-06	0.00156056	0.000172993	0	0.00112627		A/D/E
FAM36	FLNB	3:58078789	C	G	F2	6375	0	6378	0	9265	6	9276	0.000646831	3516	0	3519	0	19156	6	19173	0.00031312	0.000114918	0.000681404	0.000205738	6.62646e-06	0.000530171		A/D/E
FAM36	FLNB	3:58078789	C	G	F3	21455	0	21456	0	22223	1	22232	4.49802e-05	15441	3	15447	0.000194212	59119	4	59135	6.76556e-05	1.84342e-05	0.000173216	1.33966e-16	0	7.39164e-05		A/D/E
FAM36	FLNB	3:58078789	C	G	F4	NA	NA	NA	NA	12249	0	12252	0	7224	0	7225	0	19473	0	19477	0	0	0.000189418	0	0	6.94667e-05		A/D/E
FAM36	FLNB	3:58078789	C	G	F5	NA	NA	NA	NA	NA	NA	NA	NA	NA	NA	NA	NA	NA	NA	NA	NA	NA	NA	NA	NA	NA		A/D/E
FAM36	FLNB	3:58078789	C	G	F6	9966	1	9971	0.000100291	7955	7	7964	0.000878955	5609	1	5613	0.000178158	23530	9	23548	0.000382344	0.000174847	0.000725684	0.000274526	6.60741e-05	0.00058497		A/D/E
FAM36	FLNB	3:58078789	C	G	M1	8040	0	8042	0	12451	0	12454	0	1991	0	1991	0	22482	0	22487	0	0	0.000164068	0	0	6.01695e-05		A/D/E
FAM36	FLNB	3:58078789	C	G	M2	11086	2	11089	0.000180359	8364	2	8369	0.000238977	13434	1	13438	7.44158e-05	32884	5	32896	0.000152027	4.93644e-05	0.000354743	4.74366e-05	0	0.000227218		A/D/E
FAM36	FLNB	3:58078789	C	G	M3	9322	0	9325	0	12095	0	12097	0	13064	0	13068	0	34481	0	34490	0	0	0.000106977	0	0	3.92316e-05		A/D/E
FAM36	FLNB	3:58078789	C	G	M4	4407	0	4408	0	9801	0	9802	0	4391	0	4392	0	18599	0	18602	0	0	0.000198318	0	0	7.27309e-05		A/D/E
FAM36	FLNB	3:58078789	C	G	M5	11595	0	11600	0	13869	1	13873	7.20825e-05	10985	2	10987	0.000182033	36449	3	36460	8.23e-05	1.69726e-05	0.000240497	8.89493e-17	0	0.000120355		A/D/E
FAM36	FLNB	3:58078789	C	G	Control1	23952	1	23960	4.17362e-05	13474	3	13477	0.000222601	3667	1	3668	0.000272628	41093	5	41105	0.00012166	3.95039e-05	0.000283892	NA	NA	NA		A/D/E
FAM36	FLNB	3:58078789	C	G	Control2	92	0	92	0	18391	1	18397	5.43567e-05	10087	0	10088	0	28570	1	28577	3.50005e-05	8.86136e-07	0.000194995	NA	NA	NA		A/D/E
FAM36	FLNB	3:58078789	C	G	Control3	16466	3	16475	0.000182094	24435	4	24446	0.000163626	16336	0	16338	0	57237	7	57259	0.000122284	4.91657e-05	0.000251935	NA	NA	NA		A/D/E
FAM38	AHDC1	1:27548981	G	delG	C1	NA	NA	NA	NA	524	325	849	0.382803	789	740	1529	0.483976	1313	1065	2378	0.447855	0.427733	0.468106	0.447592	0.42766	0.467636		D/E
FAM38	AHDC1	1:27548981	G	delG	C2	1031	1035	2066	0.500968	1121	1130	2251	0.501999	2875	3142	6018	0.5221	5027	5307	10335	0.513548	0.50386	0.523228	0.513316	0.503672	0.522953		D/E
FAM38	AHDC1	1:27548981	G	delG	C7	8320	8862	17186	0.515652	5914	6136	12052	0.509127	7356	7956	15315	0.519491	21590	22954	44553	0.515311	0.510658	0.519962	0.51508	0.510435	0.519722		D/E
FAM38	AHDC1	1:27548981	G	delG	F1	11310	9	11321	0.000794983	16453	11	16466	0.000668043	26467	14	26485	0.000528601	54230	34	54272	0.000626566	0.000433953	0.000875455	0.00015576	0	0.000410411		D/E
FAM38	AHDC1	1:27548981	G	delG	F2	11562	5	11568	0.000432227	12503	4	12510	0.000319744	16600	6	16607	0.000361293	40665	15	40685	0.000368732	0.00020639	0.000608094	9.83463e-17	0	0.000164933		D/E
FAM38	AHDC1	1:27548981	G	delG	F3	12587	9	12596	0.000714513	21276	4	21282	0.000187952	17204	3	17209	0.000174327	51067	16	51087	0.000313216	0.00017904	0.000508593	1.6424e-06	0	0.000111133		D/E
FAM38	AHDC1	1:27548981	G	delG	F4	10909	3	10916	0.000274826	15713	7	15723	0.000445208	13161	7	13170	0.000531511	39783	17	39809	0.000427136	0.000248841	0.000683798	1.23398e-16	0	0.0002177		D/E
FAM38	AHDC1	1:27548981	G	delG	F5	5419	3	5423	0.000553199	1493	1	1494	0.000669344	3099	2	3101	0.000644953	10011	6	10018	0.000598982	0.000219846	0.00130327	0.000127883	0	0.000748869		D/E
FAM38	AHDC1	1:27548981	G	delG	F6	19959	7	19967	0.000350578	23578	8	23588	0.000339156	25676	7	25685	0.000272533	69213	22	69240	0.000317758	0.000199148	0.000481051	7.45192e-17	0	9.07343e-05		D/E
FAM38	AHDC1	1:27548981	G	delG	M1	20778	11	20794	0.000528999	9110	8	9118	0.000877385	7551	4	7557	0.000529311	37439	23	37469	0.000613955	0.000389234	0.000921093	0.000142911	0	0.000445358		D/E
FAM38	AHDC1	1:27548981	G	delG	M2	12638	4	12646	0.000316306	12466	4	12472	0.000320718	10722	3	10727	0.000279668	35826	11	35845	0.000306945	0.000153236	0.000549143	1.4348e-16	0	0.000139333		D/E
FAM38	AHDC1	1:27548981	G	delG	M3	19622	10	19637	0.000509243	16410	8	16420	0.000487211	12678	5	12684	0.000394197	48710	23	48741	0.000471959	0.000299205	0.000708087	2.1144e-06	0	0.000242799		D/E
FAM38	AHDC1	1:27548981	G	delG	M4	NA	NA	NA	NA	7086	1	7089	0.000141064	6096	6	6103	0.000983123	13182	7	13192	0.000530745	0.000213413	0.00109323	6.02549e-05	0	0.000564005		D/E
FAM38	AHDC1	1:27548981	G	delG	M5	9678	6	9685	0.000619515	8016	2	8018	0.000249439	6582	3	6585	0.000455581	24276	11	24288	0.000452917	0.000226116	0.000810249	1.30846e-16	0	0.000320059		D/E
FAM38	AHDC1	1:27548981	G	delG	Control1	22575	13	22591	0.00057545	14678	8	14686	0.000544736	17542	5	17549	0.000284917	54795	26	54826	0.000474271	0.000309832	0.00069484	NA	NA	NA		D/E
FAM38	AHDC1	1:27548981	G	delG	Control2	16534	2	16538	0.000120934	14289	11	14302	0.000769123	18046	13	18061	0.000719783	48869	26	48901	0.000531752	0.000347386	0.000779043	NA	NA	NA		D/E
FAM38	AHDC1	1:27548981	G	delG	Control3	15702	5	15709	0.000318289	14853	6	14860	0.000403769	18957	9	18969	0.000474458	49512	20	49538	0.000403779	0.000246656	0.000623536	NA	NA	NA		D/E
FAM39	SATB2	2:199348709	G	A	C1	6193	6192	12389	0.499798	7413	8068	15484	0.521054	8319	8216	16536	0.496855	21925	22476	44409	0.506205	0.501543	0.510866	0.506095	0.501443	0.510746		A
FAM39	SATB2	2:199348709	G	A	C2	7569	7849	15421	0.508981	9966	10358	20325	0.509619	9795	9776	19573	0.499464	27330	27983	55319	0.505903	0.501727	0.510078	0.505793	0.501625	0.50996		A
FAM39	SATB2	2:199348709	G	A	C7	11566	12472	24040	0.518802	14545	16024	30570	0.524174	12421	13045	25470	0.512171	38532	41541	80080	0.518789	0.515321	0.522255	0.518682	0.51522	0.522143		A
FAM39	SATB2	2:199348709	G	A	F1	20563	1	20565	4.86263e-05	24124	9	24138	0.000372856	23610	1	23613	4.23496e-05	68297	11	68316	0.000161035	8.03909e-05	0.000288118	1.21797e-16	0	8.515e-05		A
FAM39	SATB2	2:199348709	G	A	F2	29418	2	29420	6.7981e-05	26535	10	26545	0.000376719	18947	5	18952	0.000263824	74900	17	74917	0.000226918	0.000132193	0.000363293	8.38348e-06	0	0.00014461		A
FAM39	SATB2	2:199348709	G	A	F3	25602	2	25606	7.81067e-05	37542	6	37551	0.000159783	23067	2	23070	8.66927e-05	86211	10	86227	0.000115981	5.56188e-05	0.000213283	1.41936e-16	0	4.93278e-05		A
FAM39	SATB2	2:199348709	G	A	F4	22714	1	22715	4.40238e-05	26767	5	26773	0.000186755	19711	1	19716	5.07202e-05	69192	7	69204	0.000101158	4.06715e-05	0.000208412	1.23795e-16	0	5.25084e-05		A
FAM39	SATB2	2:199348709	G	A	F5	NA	NA	NA	NA	NA	NA	NA	NA	NA	NA	NA	NA	NA	NA	NA	NA	NA	NA	NA	NA	NA		A
FAM39	SATB2	2:199348709	G	A	F6	17431	0	17432	0	32404	6	32411	0.000185122	0	0	0	NA	49835	6	49843	0.000120383	4.41796e-05	0.000262004	1.47322e-16	0	7.87323e-05		A
FAM39	SATB2	2:199348709	G	A	M1	19949	0	19949	0	19138	2	19142	0.000104482	2	0	2	0	39089	2	39093	5.11627e-05	6.1961e-06	0.000184805	8.99055e-17	0	6.36525e-05		A
FAM39	SATB2	2:199348709	G	A	M2	25547	3	25555	0.000117394	20019	3	20024	0.00014982	0	0	0	NA	45566	6	45579	0.00013166	4.83183e-05	0.000286546	8.71082e-17	0	9.14252e-05		A
FAM39	SATB2	2:199348709	G	A	M3	23323	4	23330	0.000171453	26462	5	26469	0.0001889	25457	1	25461	3.92758e-05	75242	10	75260	0.000132887	6.37262e-05	0.00024437	8.86098e-17	0	6.28076e-05		A
FAM39	SATB2	2:199348709	G	A	M4	12242	6	12249	0.000489836	21406	0	21410	0	17777	2	17780	0.000112486	51425	8	51439	0.000155542	6.71544e-05	0.000306457	1.16335e-16	0	9.92951e-05		A
FAM39	SATB2	2:199348709	G	A	M5	4789	0	4789	0	1818	1	1819	0.000549753	2735	0	2735	0	9342	1	9343	0.000107032	2.70981e-06	0.000596198	1.30984e-16	0	0.000299119		A
FAM39	SATB2	2:199348709	G	A	Control1	27752	8	27762	0.000288164	21016	5	21024	0.000237823	20323	4	20329	0.000196763	69091	17	69115	0.000245992	0.000143306	0.000393828	NA	NA	NA		A
FAM39	SATB2	2:199348709	G	A	Control2	25596	4	25604	0.000156226	30508	10	30526	0.00032759	25345	2	25350	7.88955e-05	81449	16	81480	0.000196403	0.000112266	0.000318927	NA	NA	NA		A
FAM39	SATB2	2:199348709	G	A	Control3	24616	9	24629	0.000365423	31157	5	31162	0.000160452	27137	4	27146	0.000147351	82910	18	82937	0.000217056	0.000128646	0.00034302	NA	NA	NA		A
FAM41	SETBP1	18:44951942	G	A	C1	5893	5598	11491	0.487164	5600	5259	10859	0.484299	997	984	1981	0.496719	12490	11841	24331	0.486663	0.480364	0.492965	0.486577	0.480297	0.49286		A
FAM41	SETBP1	18:44951942	G	A	C2	7029	6581	13610	0.483542	5608	5439	11047	0.492351	4656	4988	9644	0.517213	17293	17008	34301	0.495846	0.49054	0.501151	0.495761	0.49047	0.501053		A
FAM41	SETBP1	18:44951942	G	A	C7	10517	9997	20516	0.487278	9408	8493	17902	0.474416	6008	5806	11816	0.491368	25933	24296	50234	0.483705	0.479325	0.488086	0.483618	0.479248	0.48799		A
FAM41	SETBP1	18:44951942	G	A	F1	9924	1	9926	0.000100746	11804	2	11806	0.000169405	11635	1	11636	8.59402e-05	33363	4	33368	0.000119879	3.26639e-05	0.000306909	1.46706e-16	0	0.000134653		A
FAM41	SETBP1	18:44951942	G	A	F2	15788	6	15794	0.000379891	17957	5	17963	0.00027835	7502	1	7503	0.00013328	41247	12	41260	0.000290846	0.000150293	0.000507994	0.000127593	0	0.000332031		A
FAM41	SETBP1	18:44951942	G	A	F3	16683	2	16687	0.000119854	21976	3	21980	0.000136488	16982	0	16982	0	55641	5	55649	8.98537e-05	2.91759e-05	0.000209676	1.03907e-16	0	7.24267e-05		A
FAM41	SETBP1	18:44951942	G	A	F4	13213	3	13217	0.00022698	18957	4	18961	0.000210959	17012	4	17019	0.000235031	49182	11	49197	0.000223609	0.00011163	0.000400063	6.14097e-05	0	0.000229705		A
FAM41	SETBP1	18:44951942	G	A	F5	11898	4	11902	0.000336078	9594	2	9598	0.000208377	NA	NA	NA	NA	21492	6	21500	0.000279096	0.00010243	0.000607374	0.000115821	0	0.000406838		A
FAM41	SETBP1	18:44951942	G	A	F6	15989	6	15996	0.000375094	18722	5	18728	0.00026698	16563	0	16566	0	51274	11	51290	0.000214488	0.000107076	0.000383745	5.24728e-05	0	0.000214607		A
FAM41	SETBP1	18:44951942	G	A	M1	17970	4	17974	0.000222544	15106	2	15108	0.00013238	13039	1	13043	7.66695e-05	46115	7	46125	0.000151771	6.10221e-05	0.000312682	1.1172e-16	0	0.000142688		A
FAM41	SETBP1	18:44951942	G	A	M2	9987	2	9989	0.00020022	12308	5	12314	0.000406042	13216	2	13218	0.000151309	35511	9	35521	0.000253378	0.000115867	0.000480936	9.05863e-05	0	0.000300891		A
FAM41	SETBP1	18:44951942	G	A	M3	16891	0	16891	0	21337	4	21341	0.000187433	17046	3	17049	0.000175963	55274	7	55281	0.000126626	5.09116e-05	0.00026088	8.09476e-17	0	0.000102251		A
FAM41	SETBP1	18:44951942	G	A	M4	18483	4	18487	0.000216368	21129	4	21133	0.000189277	20247	3	20250	0.000148148	59859	11	59870	0.000183731	9.17215e-05	0.000328722	2.24214e-05	0	0.000164008		A
FAM41	SETBP1	18:44951942	G	A	M5	19509	5	19515	0.000256213	14615	7	14622	0.000478731	9697	1	9698	0.000103114	43821	13	43835	0.000296573	0.000157922	0.000507096	0.000133275	0	0.000332701		A
FAM41	SETBP1	18:44951942	G	A	Control1	17484	2	17486	0.000114377	15028	0	15028	0	15819	2	15822	0.000126406	48331	4	48336	8.27558e-05	2.25486e-05	0.000211874	NA	NA	NA		A
FAM41	SETBP1	18:44951942	G	A	Control2	15626	2	15629	0.000127967	16976	6	16982	0.000353315	21361	1	21362	4.68121e-05	53963	9	53973	0.000166753	7.62529e-05	0.000316526	NA	NA	NA		A
FAM41	SETBP1	18:44951942	G	A	Control3	16936	3	16940	0.000177096	15808	4	15814	0.00025294	14290	4	14295	0.000279818	47034	11	47049	0.000233819	0.000116727	0.000418328	NA	NA	NA		A
FAM42	RSP19	19:41869154_41869155	TG	delTG	C1	1338	1298	2638	0.492039	909	1872	2781	0.673139	649	1145	1794	0.638239	2896	4315	7213	0.598391	0.586969	0.609734	0.598367	0.587018	0.609646		A
FAM42	RSP19	19:41869154_41869155	TG	delTG	C2	922	1350	2272	0.59419	778	1488	2267	0.656374	722	1179	1901	0.6202	2422	4017	6440	0.623855	0.611891	0.635706	0.623832	0.611951	0.635613		A
FAM42	RSP19	19:41869154_41869155	TG	delTG	C7	10725	11233	21963	0.511451	10602	11732	22346	0.525016	9464	10245	19713	0.519708	30791	33210	64022	0.518898	0.515019	0.522776	0.518869	0.514997	0.522738		A
FAM42	RSP19	19:41869154_41869155	TG	delTG	F1	7892	1	7896	0.000126646	16829	1	16831	5.94142e-05	14125	0	14127	0	38846	2	38854	5.14827e-05	6.23485e-06	0.000185961	9.09309e-17	0	0.000104901		A
FAM42	RSP19	19:41869154_41869155	TG	delTG	F2	9877	0	9877	0	16359	1	16363	6.11135e-05	18183	1	18186	5.49874e-05	44419	2	44426	4.50238e-05	5.45263e-06	0.000162632	1.44252e-16	0	8.69039e-05		A
FAM42	RSP19	19:41869154_41869155	TG	delTG	F3	23984	0	23989	0	29034	1	29040	3.44353e-05	27652	1	27653	3.61624e-05	80670	2	80682	2.47917e-05	3.00241e-06	8.95534e-05	1.28521e-16	0	3.87642e-05		A
FAM42	RSP19	19:41869154_41869155	TG	delTG	F4	20249	2	20255	9.87411e-05	27973	1	27974	3.57475e-05	26120	0	26125	0	74342	3	74354	4.03524e-05	8.32171e-06	0.000117922	1.29285e-16	0	5.60992e-05		A
FAM42	RSP19	19:41869154_41869155	TG	delTG	F5	17409	0	17412	0	12803	0	12807	0	13207	0	13208	0	43419	0	43427	0	0	8.49564e-05	0	0	3.11557e-05		A
FAM42	RSP19	19:41869154_41869155	TG	delTG	F6	19600	1	19602	5.10152e-05	30202	0	30208	0	32456	0	32460	0	82258	1	82270	1.21567e-05	3.07782e-07	6.77311e-05	9.09758e-17	0	2.96069e-05		A
FAM42	RSP19	19:41869154_41869155	TG	delTG	M1	2117	0	2118	0	3210	0	3210	0	3057	1	3059	0.000326904	8384	1	8387	0.000119261	3.01941e-06	0.000664296	6.0629e-05	0	0.000466392		A
FAM42	RSP19	19:41869154_41869155	TG	delTG	M2	4	1	5	0.2	7154	0	7156	0	6527	0	6527	0	13685	1	13688	7.30674e-05	1.8499e-06	0.000407037	1.58023e-05	0	0.000264426		A
FAM42	RSP19	19:41869154_41869155	TG	delTG	M3	12061	2	12063	0.000165796	22079	2	22086	9.05551e-05	25776	1	25785	3.87822e-05	59916	5	59934	8.34432e-05	2.70943e-05	0.000194718	2.59236e-05	0	0.000124812		A
FAM42	RSP19	19:41869154_41869155	TG	delTG	M4	15948	2	15954	0.00012536	23263	1	23266	4.29812e-05	33642	2	33647	5.94407e-05	72853	5	72867	6.86266e-05	2.22832e-05	0.000160144	1.17189e-05	0	9.41439e-05		A
FAM42	RSP19	19:41869154_41869155	TG	delTG	M5	13498	0	13500	0	14194	1	14199	7.04275e-05	14184	0	14185	0	41876	1	41884	2.38795e-05	6.04575e-07	0.000133041	1.23792e-16	0	6.5634e-05		A
FAM42	RSP19	19:41869154_41869155	TG	delTG	Control1	17424	1	17426	5.73855e-05	22984	0	22986	0	24742	0	24749	0	65150	1	65161	1.5349e-05	3.88602e-07	8.55159e-05	NA	NA	NA		A
FAM42	RSP19	19:41869154_41869155	TG	delTG	Control2	22552	1	22560	4.43262e-05	23680	4	23686	0.000168876	25403	3	25414	0.000118045	71635	8	71660	0.000111665	4.82101e-05	0.000220012	NA	NA	NA		A
FAM42	RSP19	19:41869154_41869155	TG	delTG	Control3	29656	0	29661	0	25863	2	25868	7.73156e-05	21008	1	21016	4.75828e-05	76527	3	76545	3.92003e-05	8.08412e-06	0.000114556	NA	NA	NA		A
FAM43	CHD7	8:60741901	C	T	C1	3542	3619	7162	0.505306	1184	1006	2190	0.459361	957	1067	2025	0.526914	5683	5692	11377	0.500396	0.491164	0.509627	0.500315	0.491125	0.509504		A
FAM43	CHD7	8:60741901	C	T	C2	5408	5533	10943	0.50562	3658	4094	7752	0.528122	2266	2204	4470	0.493065	11332	11831	23165	0.510771	0.504311	0.517229	0.510692	0.504253	0.51713		A
FAM43	CHD7	8:60741901	C	T	C7	NA	NA	NA	NA	NA	NA	NA	NA	NA	NA	NA	NA	NA	NA	NA	NA	NA	NA	NA	NA	NA		A
FAM43	CHD7	8:60741901	C	T	F1	7050	1	7051	0.000141824	7533	0	7534	0	4827	0	4827	0	19410	1	19412	5.15172e-05	1.3043e-06	0.000287002	9.10413e-17	0	0.000135705		A
FAM43	CHD7	8:60741901	C	T	F2	7004	3	7007	0.000428143	5553	2	5555	0.000360036	4574	0	4574	0	17131	5	17136	0.000291783	9.47478e-05	0.000680793	0.000137041	0	0.000478566		A
FAM43	CHD7	8:60741901	C	T	F3	7609	0	7609	0	5550	1	5551	0.000180148	7988	1	7989	0.000125172	21147	2	21149	9.45671e-05	1.14527e-05	0.000341567	1.1324e-16	0	0.000166862		A
FAM43	CHD7	8:60741901	C	T	F4	5056	2	5058	0.000395413	9369	0	9369	0	7460	2	7462	0.000268025	21885	4	21889	0.00018274	4.97927e-05	0.000467821	3.15219e-05	0	0.000280949		A
FAM43	CHD7	8:60741901	C	T	F5	NA	NA	NA	NA	NA	NA	NA	NA	NA	NA	NA	NA	NA	NA	NA	NA	NA	NA	NA	NA	NA		A
FAM43	CHD7	8:60741901	C	T	F6	3677	0	3677	0	6942	3	6945	0.000431965	3011	0	3011	0	13630	3	13633	0.000220054	4.53828e-05	0.000642956	6.71525e-05	0	0.000422422		A
FAM43	CHD7	8:60741901	C	T	M1	9603	0	9603	0	11054	0	11055	0	4884	1	4885	0.000204708	25541	1	25543	3.91512e-05	9.91222e-07	0.000218117	1.25437e-16	0	9.82038e-05		A
FAM43	CHD7	8:60741901	C	T	M2	7835	0	7835	0	11562	2	11564	0.000172951	5556	2	5558	0.000359842	24953	4	24957	0.000160276	4.36714e-05	0.000410318	1.02444e-05	0	0.000230929		A
FAM43	CHD7	8:60741901	C	T	M3	8979	2	8981	0.000222692	11938	1	11939	8.37591e-05	9168	3	9171	0.000327118	30085	6	30091	0.000199395	7.31779e-05	0.000433948	4.76054e-05	0	0.000262406		A
FAM43	CHD7	8:60741901	C	T	M4	8647	14	8661	0.00161644	13627	14	13641	0.00102632	8841	4	8845	0.000452233	31115	32	31147	0.00102739	0.000702834	0.00145006	0.000868189	0.000538305	0.0012737		A
FAM43	CHD7	8:60741901	C	T	M5	1510	3	1513	0.00198282	1992	0	1992	0	2482	1	2483	0.000402739	5984	4	5988	0.000668003	0.000182037	0.00170946	0.000509335	3.87504e-05	0.00139498		A
FAM43	CHD7	8:60741901	C	T	Control1	12694	4	12698	0.00031501	7298	1	7299	0.000137005	5030	2	5032	0.000397456	25022	7	25029	0.000279676	0.000112451	0.000576153	NA	NA	NA		A
FAM43	CHD7	8:60741901	C	T	Control2	7333	0	7333	0	14316	2	14318	0.000139684	3211	2	3213	0.000622471	24860	4	24864	0.000160875	4.38348e-05	0.000411853	NA	NA	NA		A
FAM43	CHD7	8:60741901	C	T	Control3	9774	0	9774	0	11748	1	11749	8.51136e-05	8916	0	8916	0	30438	1	30439	3.28526e-05	8.31755e-07	0.000183029	NA	NA	NA		A
FAM44	COL2A1	12:47975568	C	G	C1	2421	2560	4983	0.513747	4749	4226	8977	0.470759	2407	2382	4789	S	9577	9168	18749	0.48909	0.48191	0.496274	0.489058	0.481904	0.496216		A
FAM44	COL2A1	12:47975568	C	G	C2	3458	3201	6660	0.480631	5553	5212	10765	0.484162	2102	1898	4000	0.4745	11113	10311	21425	0.481283	0.474572	0.487999	0.48125	0.474562	0.487943		A
FAM44	COL2A1	12:47975568	C	G	C7	5158	4759	9917	0.479883	6556	5684	12241	0.464341	2800	2401	5201	0.461642	14514	12844	27359	0.469479	0.46355	0.475414	0.469446	0.463534	0.475362		A
FAM44	COL2A1	12:47975568	C	G	F1	4705	0	4708	0	5794	0	5795	0	4131	0	4131	0	14630	0	14634	0	0	0.000252113	0	0	9.24613e-05		A
FAM44	COL2A1	12:47975568	C	G	F2	5546	0	5546	0	4355	0	4355	0	5018	0	5018	0	14919	0	14919	0	0	0.00024723	0	0	9.06703e-05		A
FAM44	COL2A1	12:47975568	C	G	F3	9600	0	9601	0	11163	1	11165	8.95656e-05	10610	0	10612	0	31373	1	31378	3.18735e-05	8.06967e-07	0.000177575	9.12184e-17	0	9.81006e-05		A
FAM44	COL2A1	12:47975568	C	G	F4	11870	0	11873	0	9091	1	9092	0.000109987	9888	0	9889	0	30849	1	30854	3.24149e-05	8.20674e-07	0.000180591	9.4025e-17	0	0.000100114		A
FAM44	COL2A1	12:47975568	C	G	F5	1616	1	1619	0.000617665	3390	0	3391	0	1528	0	1528	0	6534	1	6538	0.000153022	3.87418e-06	0.000852287	9.51017e-05	0	0.000615694		A
FAM44	COL2A1	12:47975568	C	G	F6	10866	1	10868	9.20132e-05	10494	0	10494	0	10561	0	10564	0	31921	1	31926	3.13264e-05	7.93114e-07	0.000174527	8.83819e-17	0	9.60749e-05		A
FAM44	COL2A1	12:47975568	C	G	M1	4697	1	4700	0.000212766	3219	0	3220	0	0	0	0	NA	7916	1	7920	0.00012631	3.1979e-06	0.000703554	6.93012e-05	0	0.000499043		A
FAM44	COL2A1	12:47975568	C	G	M2	6647	1	6650	0.000150376	2613	1	2614	0.000382555	0	0	0	NA	9260	2	9264	0.000215936	2.61519e-05	0.000779815	0.000156832	0	0.00060856		A
FAM44	COL2A1	12:47975568	C	G	M3	1485	0	1485	0	1633	1	1635	0.000611621	0	0	0	NA	3118	1	3120	0.000320616	8.11725e-06	0.00178505	0.000260318	0	0.00135068		A
FAM44	COL2A1	12:47975568	C	G	M4	6964	0	6967	0	5806	0	5807	0	0	0	0	NA	12770	0	12774	0	0	0.000288829	0	0	0.000105928		A
FAM44	COL2A1	12:47975568	C	G	M5	7199	0	7201	0	4521	0	4521	0	0	0	0	NA	11720	0	11722	0	0	0.000314701	0	0	0.000115418		A
FAM44	COL2A1	12:47975568	C	G	Control1	11030	0	11032	0	11754	0	11758	0	12147	0	12149	0	34931	0	34939	0	0	0.000105599	NA	NA	NA		A
FAM44	COL2A1	12:47975568	C	G	Control2	8317	0	8318	0	6678	1	6679	0.000149723	0	0	0	NA	14995	1	14997	6.66844e-05	1.6883e-06	0.000371485	NA	NA	NA		A
FAM44	COL2A1	12:47975568	C	G	Control3	9982	1	9987	0.00010013	10743	1	10746	9.30579e-05	9126	1	9129	0.000109541	29851	3	29862	0.000100489	2.07237e-05	0.000293643	NA	NA	NA		A
FAM45	DYNCIHI	14:102002949	C	T	C1	7584	8260	15848	0.521201	1668	1891	3561	0.531031	2842	2972	5814	0.51118	12094	13123	25223	0.520403	0.514215	0.526586	0.52016	0.513988	0.526327		D/E
FAM45	DYNCIHI	14:102002949	C	T	C2	1280	1263	2543	0.496657	177	178	355	0.501408	144	124	268	0.462687	1601	1565	3166	0.494315	0.476753	0.511886	0.494058	0.476643	0.511482		D/E
FAM45	DYNCIHI	14:102002949	C	T	C7	8161	9449	17610	0.53657	1060	1213	2274	0.533421	1677	1671	3348	0.499104	10898	12333	23232	0.530885	0.524443	0.53732	0.530647	0.524223	0.537065		D/E
FAM45	DYNCIHI	14:102002949	C	T	F1	3160	0	3160	0	3551	0	3552	0	6351	2	6353	0.000314812	13062	2	13065	0.000153092	1.85407e-05	0.000552912	1.13337e-16	0	0.000204277		D/E
FAM45	DYNCIHI	14:102002949	C	T	F2	421	1	422	0.00236967	381	1	382	0.0026178	487	2	489	0.00408998	1289	4	1293	0.00309358	0.00084352	0.0079017	0.00258958	0.000450223	0.00667152		D/E
FAM45	DYNCIHI	14:102002949	C	T	F3	12032	5	12039	0.000415317	7568	2	7572	0.000264131	19916	8	19928	0.000401445	39516	15	39539	0.000379449	0.00021239	0.000625766	1.03356e-16	0	0.000174061		D/E
FAM45	DYNCIHI	14:102002949	C	T	F4	9307	4	9311	0.000429599	8253	2	8257	0.000242219	12672	5	12680	0.000394322	30232	11	30248	0.000363721	0.000181582	0.000650703	9.6004e-17	0	0.000194156		D/E
FAM45	DYNCIHI	14:102002949	C	T	F5	70	1	71	0.0140845	129	0	130	0	187	0	187	0	386	1	388	0.00258398	6.54186e-05	0.0143123	0.00208007	0	0.0108279		D/E
FAM45	DYNCIHI	14:102002949	C	T	F6	7156	4	7164	0.000558347	6974	4	6978	0.00057323	7750	3	7754	0.000386897	21880	11	21896	0.00050249	0.000250867	0.000898914	6.48185e-06	0	0.000385851		D/E
FAM45	DYNCIHI	14:102002949	C	T	M1	12028	8	12038	0.000664562	6309	2	6312	0.000316857	8	0	8	0	18345	10	18358	0.000544811	0.000261288	0.0010017	4.80919e-05	0	0.000477265		D/E
FAM45	DYNCIHI	14:102002949	C	T	M2	8007	1	8009	0.00012486	8506	7	8514	0.000822175	11091	4	11096	0.00036049	27604	12	27619	0.000434531	0.000224548	0.000758915	1.25534e-16	0	0.000267576		D/E
FAM45	DYNCIHI	14:102002949	C	T	M3	8438	1	8440	0.000118483	5978	0	5979	0	12609	8	12618	0.000634015	27025	9	27037	0.000332914	0.00015224	0.00063188	8.16037e-17	0	0.000187672		D/E
FAM45	DYNCIHI	14:102002949	C	T	M4	8592	2	8594	0.000232721	9763	6	9772	0.000613999	15584	6	15590	0.000384862	33939	14	33956	0.000412335	0.000225445	0.000691731	1.18728e-16	0	0.000217902		D/E
FAM45	DYNCIHI	14:102002949	C	T	M5	1508	2	1510	0.0013245	703	0	703	0	1768	4	1772	0.00225734	3979	6	3985	0.00150565	0.00055274	0.00327426	0.00100285	8.10926e-05	0.00255124		D/E
FAM45	DYNCIHI	14:102002949	C	T	Control1	12003	1	12009	8.32709e-05	2236	0	2236	0	5761	7	5772	0.00121275	20000	8	20017	0.00039984	0.000172638	0.000787691	NA	NA	NA		D/E
FAM45	DYNCIHI	14:102002949	C	T	Control2	7199	7	7208	0.000971143	10751	4	10757	0.000371851	12411	5	12419	0.000402609	30361	16	30384	0.000526714	0.000301092	0.00085521	NA	NA	NA		D/E
FAM45	DYNCIHI	14:102002949	C	T	Control3	16093	10	16105	0.000620925	10107	5	10114	0.000494364	12123	5	12128	0.000412269	38323	20	38347	0.000521608	0.00031864	0.000805466	NA	NA	NA		D/E
FAM46	SMC3	10:110602966	C	G	C1	NA	NA	NA	NA	NA	NA	NA	NA	NA	NA	NA	NA	NA	NA	NA	NA	NA	NA	NA	NA	NA		A
FAM46	SMC3	10:110602966	C	G	C2	NA	NA	NA	NA	NA	NA	NA	NA	NA	NA	NA	NA	NA	NA	NA	NA	NA	NA	NA	NA	NA		A
FAM46	SMC3	10:110602966	C	G	C7	4149	4850	9010	0.538291	3541	3772	7324	0.515019	5003	6025	11043	0.545594	12693	14647	27377	0.535735	0.529802	0.541661	0.535692	0.529776	0.5416		A
FAM46	SMC3	10:110602966	C	G	F1	6369	0	6381	0	6312	0	6321	0	6620	0	6627	0	19301	0	19329	0	0	0.000191105	0	0	7.00857e-05		A
FAM46	SMC3	10:110602966	C	G	F2	8019	0	8026	0	8954	0	8967	0	9488	0	9503	0	26461	0	26496	0	0	0.000139398	0	0	5.11219e-05		A
FAM46	SMC3	10:110602966	C	G	F3	3094	0	3102	0	2793	0	2798	0	7807	0	7815	0	13694	0	13715	0	0	0.000269343	0	0	9.87808e-05		A
FAM46	SMC3	10:110602966	C	G	F4	6669	1	6679	0.000149723	6468	0	6475	0	7101	0	7113	0	20238	1	20267	4.94096e-05	1.25094e-06	0.000275261	8.42887e-17	0	0.00014953		A
FAM46	SMC3	10:110602966	C	G	F5	2191	0	2195	0	2236	0	2238	0	2310	0	2312	0	6737	0	6745	0	0	0.000547405	0	0	0.000200777		A
FAM46	SMC3	10:110602966	C	G	F6	4247	0	4251	0	3791	0	3796	0	4248	1	4254	0.000235073	12286	1	12301	8.13868e-05	2.06053e-06	0.000453374	6.29142e-07	0	0.000277563		A
FAM46	SMC3	10:110602966	C	G	M1	8523	0	8537	0	7705	1	7721	0.000129517	7925	1	7940	0.000125945	24153	2	24198	8.27986e-05	1.00275e-05	0.000299065	1.88096e-06	0	0.000178461		A
FAM46	SMC3	10:110602966	C	G	M2	9279	0	9291	0	9051	1	9070	0.000110254	7638	0	7650	0	25968	1	26011	3.85075e-05	9.74924e-07	0.000214531	1.23374e-16	0	0.000110525		A
FAM46	SMC3	10:110602966	C	G	M3	7928	0	7943	0	5885	0	5894	0	5823	0	5827	0	19636	0	19664	0	0	0.000187845	0	0	6.88901e-05		A
FAM46	SMC3	10:110602966	C	G	M4	5026	2	5031	0.000397535	4993	0	5002	0	4262	1	4275	0.000233918	14281	3	14308	0.000210025	4.33143e-05	0.000613659	0.000121938	0	0.000459428		A
FAM46	SMC3	10:110602966	C	G	M5	3831	0	3832	0	5677	0	5691	0	4838	0	4843	0	14346	0	14366	0	0	0.000257103	0	0	9.42916e-05		A
FAM46	SMC3	10:110602966	C	G	Control1	8118	1	8131	0.000122986	6501	1	6511	0.000153586	11692	0	11714	0	26311	2	26356	7.60081e-05	9.20506e-06	0.00027454	NA	NA	NA		A
FAM46	SMC3	10:110602966	C	G	Control2	9009	0	9017	0	6612	0	6624	0	6320	0	6326	0	21941	0	21967	0	0	0.000168113	NA	NA	NA		A
FAM46	SMC3	10:110602966	C	G	Control3	7356	1	7361	0.000135851	9479	0	9493	0	9298	3	9314	0.000322096	26133	4	26168	0.00015304	4.16997e-05	0.000391796	NA	NA	NA		A
FAM47	SMARCB1	22:23825396	C	T	C1	NA	NA	NA	NA	NA	NA	NA	NA	NA	NA	NA	NA	NA	NA	NA	NA	NA	NA	NA	NA	NA		A/D/E
FAM47	SMARCB1	22:23825396	C	T	C2	NA	NA	NA	NA	NA	NA	NA	NA	NA	NA	NA	NA	NA	NA	NA	NA	NA	NA	NA	NA	NA		A/D/E
FAM47	SMARCB1	22:23825396	C	T	C7	7096	6912	14012	0.493291	3253	2934	6187	0.47422	3403	3198	6605	0.484179	13752	13044	26804	0.486789	0.480788	0.492793	0.486758	0.480774	0.492744		A/D/E
FAM47	SMARCB1	22:23825396	C	T	F1	3723	0	3727	0	575	0	575	0	3447	0	3449	0	7745	0	7751	0	0	0.000476178	0	0	0.000174649		A/D/E
FAM47	SMARCB1	22:23825396	C	T	F2	874	1	875	0.00114286	353	0	354	0	843	0	844	0	2070	1	2073	0.000482859	1.22248e-05	0.00268735	0.000422682	0	0.00206421		A/D/E
FAM47	SMARCB1	22:23825396	C	T	F3	2	0	2	0	5288	1	5291	0.000189	3	0	3	0	5293	1	5296	0.000188893	4.78235e-06	0.00105199	0.000130585	0	0.000773162		A/D/E
FAM47	SMARCB1	22:23825396	C	T	F4	8619	0	8621	0	7455	0	7459	0	8318	2	8324	0.000240269	24392	2	24404	8.19874e-05	9.92921e-06	0.000296135	2.75491e-05	0	0.000200591		A/D/E
FAM47	SMARCB1	22:23825396	C	T	F5	NA	NA	NA	NA	NA	NA	NA	NA	NA	NA	NA	NA	NA	NA	NA	NA	NA	NA	NA	NA	NA		A/D/E
FAM47	SMARCB1	22:23825396	C	T	F6	9552	0	9557	0	9153	0	9158	0	12834	0	12846	0	31539	0	31561	0	0	0.000116956	0	0	4.28911e-05		A/D/E
FAM47	SMARCB1	22:23825396	C	T	M1	4424	0	4428	0	9619	1	9624	0.000103907	19843	3	19858	0.000151073	33886	4	33910	0.000118029	3.21598e-05	0.000302173	6.19501e-05	0	0.000221424		A/D/E
FAM47	SMARCB1	22:23825396	C	T	M2	5888	1	5895	0.000169635	10613	3	10624	0.00028238	17641	2	17655	0.000113282	34142	6	34174	0.000175706	6.44836e-05	0.000382398	0.000118132	0	0.000301926		A/D/E
FAM47	SMARCB1	22:23825396	C	T	M3	4883	1	4889	0.000204541	11204	2	11210	0.000178412	865	0	865	0	16952	3	16964	0.000176939	3.64906e-05	0.000517003	0.000119046	0	0.000402648		A/D/E
FAM47	SMARCB1	22:23825396	C	T	M4	4575	0	4578	0	4	0	4	0	14471	1	14476	6.90799e-05	19050	1	19058	5.24907e-05	1.32895e-06	0.000292424	1.05261e-06	0	0.000179668		A/D/E
FAM47	SMARCB1	22:23825396	C	T	M5	NA	NA	NA	NA	NA	NA	NA	NA	NA	NA	NA	NA	NA	NA	NA	NA	NA	NA	NA	NA	NA		A/D/E
FAM47	SMARCB1	22:23825396	C	T	Control1	10114	0	10123	0	7045	0	7048	0	6554	0	6558	0	23713	0	23729	0	0	0.000155551	NA	NA	NA		A/D/E
FAM47	SMARCB1	22:23825396	C	T	Control2	9391	1	9398	0.000106406	12149	0	12154	0	18854	2	18864	0.000106022	40394	3	40416	7.42629e-05	1.53151e-05	0.000217012	NA	NA	NA		A/D/E
FAM47	SMARCB1	22:23825396	C	T	Control3	14588	0	14599	0	6177	1	6185	0.000161681	12716	1	12720	7.86164e-05	33481	2	33504	5.97318e-05	7.23388e-06	0.000215755	NA	NA	NA		A/D/E
FAM48	BRAF	7:140801536	C	G	C1	779	728	1508	0.482759	2624	2885	5509	0.523689	3232	3542	6774	0.522882	6635	7155	13791	0.518854	0.510475	0.527225	0.518828	0.510485	0.527164		A
FAM48	BRAF	7:140801536	C	G	C2	252	232	484	0.479339	468	527	995	0.529648	949	749	1698	0.441107	1669	1508	3177	0.474662	0.45717	0.4922	0.474633	0.457294	0.492013		A
FAM48	BRAF	7:140801536	C	G	C7	4153	4177	8330	0.501441	4319	4253	8573	0.496092	3667	3680	7348	0.500817	12139	12110	24251	0.499402	0.493089	0.505716	0.499375	0.493081	0.505668		A
FAM48	BRAF	7:140801536	C	G	F1	252	0	252	0	1066	0	1066	0	3258	0	3260	0	4576	0	4578	0	0	0.000805811	0	0	0.000295579		A
FAM48	BRAF	7:140801536	C	G	F2	1395	0	1395	0	8047	0	8047	0	20275	0	20276	0	29717	0	29718	0	0	0.000124126	0	0	4.55208e-05		A
FAM48	BRAF	7:140801536	C	G	F3	24	0	24	0	10094	0	10095	0	15958	0	15958	0	26076	0	26077	0	0	0.000141456	0	0	5.18767e-05		A
FAM48	BRAF	7:140801536	C	G	F4	5135	1	5136	0.000194704	14173	0	14174	0	16723	1	16727	5.97836e-05	36031	2	36037	5.55047e-05	6.72194e-06	0.000200487	1.19716e-05	0	0.00013046		A
FAM48	BRAF	7:140801536	C	G	F5	46	0	46	0	346	0	346	0	893	1	894	0.00111857	1285	1	1286	0.000777605	1.96871e-05	0.00432484	0.000723916	0	0.00336574		A
FAM48	BRAF	7:140801536	C	G	F6	1123	0	1123	0	16223	0	16224	0	21147	0	21149	0	38493	0	38496	0	0	9.58279e-05	0	0	3.51427e-05		A
FAM48	BRAF	7:140801536	C	G	M1	719	0	719	0	1735	0	1735	0	2024	1	2026	0.000493583	4478	1	4480	0.000223264	5.65254e-06	0.00124331	0.000171754	0	0.000931193		A
FAM48	BRAF	7:140801536	C	G	M2	495	0	495	0	2656	0	2656	0	4534	1	4535	0.000220507	7685	1	7686	0.000130107	3.29401e-06	0.000724693	8.06357e-05	0	0.000523286		A
FAM48	BRAF	7:140801536	C	G	M3	446	0	446	0	2635	0	2635	0	2649	0	2649	0	5730	0	5730	0	0	0.000643576	0	0	0.000236058		A
FAM48	BRAF	7:140801536	C	G	M4	1267	0	1267	0	1048	0	1049	0	1594	0	1594	0	3909	0	3910	0	0	0.000943244	0	0	0.000346006		A
FAM48	BRAF	7:140801536	C	G	M5	NA	NA	NA	NA	2032	0	2032	0	163	0	163	0	2195	0	2195	0	0	0.00167917	0	0	0.000616107		A
FAM48	BRAF	7:140801536	C	G	Control1	8079	0	8081	0	7397	0	7399	0	4237	0	4237	0	19713	0	19717	0	0	0.000187112	NA	NA	NA		A
FAM48	BRAF	7:140801536	C	G	Control2	10164	0	10165	0	8532	1	8536	0.000117151	4617	1	4618	0.000216544	23313	2	23319	8.57817e-05	1.03887e-05	0.000309838	NA	NA	NA		A
FAM48	BRAF	7:140801536	C	G	Control3	2643	0	2643	0	9677	0	9677	0	17813	1	17819	5.61199e-05	30133	1	30139	3.31851e-05	8.40174e-07	0.000184882	NA	NA	NA		A
FAM49	MYRF	11:61774154	G	A	C1	NA	NA	NA	NA	NA	NA	NA	NA	NA	NA	NA	NA	NA	NA	NA	NA	NA	NA	NA	NA	NA		C
FAM49	MYRF	11:61774154	G	A	C2	NA	NA	NA	NA	NA	NA	NA	NA	NA	NA	NA	NA	NA	NA	NA	NA	NA	NA	NA	NA	NA		C
FAM49	MYRF	11:61774154	G	A	C7	15201	15870	31110	0.510125	4275	4485	8769	0.511461	7566	8017	15604	0.513779	27042	28372	55483	0.512001	0.507829	0.516171	0.511833	0.507668	0.515996		C
FAM49	MYRF	11:61774154	G	A	F1	9378	1	9401	0.000106372	1932	0	1935	0	13517	7	13553	0.000516491	24827	8	24889	0.000322126	0.000139081	0.000634617	7.65609e-17	0	0.000283946		C
FAM49	MYRF	11:61774154	G	A	F2	11736	3	11764	0.000255015	4437	4	4454	0.000898069	11439	6	11480	0.000522648	27612	13	27698	0.000470588	0.000250591	0.000804586	0.000134875	0	0.000455706		C
FAM49	MYRF	11:61774154	G	A	F3	6462	27	6499	0.00415449	5077	15	5107	0.00293715	11020	48	11088	0.004329	22559	90	22694	0.00397369	0.00319649	0.00488211	0.00363189	0.00285708	0.00451587		C
FAM49	MYRF	11:61774154	G	A	F4	15259	45	15339	0.0029337	7081	33	7125	0.00463158	14101	45	14170	0.00317572	36441	123	36634	0.00336396	0.00279654	0.00401238	0.00302231	0.0024488	0.00366151		C
FAM49	MYRF	11:61774154	G	A	F5	NA	NA	NA	NA	22	0	22	0	925	0	926	0	947	0	948	0	0	0.00388776	0	0	0.00142746		C
FAM49	MYRF	11:61774154	G	A	F6	14924	927	15877	0.0583863	7357	399	7774	0.0513249	17597	1044	18680	0.0558887	39878	2370	42331	0.0560973	0.0539218	0.0583341	0.0557724	0.0536012	0.0579972		C
FAM49	MYRF	11:61774154	G	A	M1	9500	1	9528	0.000104954	3829	0	3839	0	3964	0	3973	0	17293	1	17340	5.78235e-05	1.46396e-06	0.000322129	1.11246e-16	0	0.000132957		C
FAM49	MYRF	11:61774154	G	A	M2	NA	NA	NA	NA	3115	1	3122	0.000320307	3155	0	3162	0	6270	1	6284	0.000159464	4.03728e-06	0.000888154	1.20609e-16	0	0.000444611		C
FAM49	MYRF	11:61774154	G	A	M3	3533	1	3543	0.000282247	2361	0	2366	0	4972	3	4988	0.000601443	10866	4	10897	0.000367985	0.000100272	0.000941918	3.3946e-05	0	0.000528882		C
FAM49	MYRF	11:61774154	G	A	M4	12333	2	12364	0.00016176	2965	0	2969	0	7081	0	7098	0	22379	2	22431	8.93615e-05	1.08223e-05	0.000322767	1.02932e-16	0	0.00011663		C
FAM49	MYRF	11:61774154	G	A	M5	446	1	447	0.00223714	3063	0	3070	0	1681	0	1682	0	5190	1	5199	0.000192641	4.87724e-06	0.00107286	1.45702e-16	0	0.000563492		C
FAM49	MYRF	11:61774154	G	A	Control1	23478	6	23540	0.000254885	11504	3	11524	0.000260326	11417	2	11444	0.000174764	46399	11	46508	0.000237018	0.000118324	0.000424051	NA	NA	NA		C
FAM49	MYRF	11:61774154	G	A	Control2	5502	0	5514	0	1637	3	1641	0.00182815	2170	2	2180	0.000917431	9309	5	9335	0.000536826	0.000174328	0.00125233	NA	NA	NA		C
FAM49	MYRF	11:61774154	G	A	Control3	13884	7	13924	0.000502729	5662	1	5674	0.000176243	14777	6	14826	0.000404694	34323	14	34424	0.000407723	0.000222924	0.000683996	NA	NA	NA		C
FAM50	LMx1B	9:126693213	G	delG	C1	3719	3664	7397	0.495336	1948	2809	4760	0.590126	1971	1933	3909	0.4945	7638	8406	16066	0.523934	0.516171	0.531688	0.523872	0.51614	0.531597		F
FAM50	LMx1B	9:126693213	G	delG	C2	1111	1302	2414	0.539354	373	622	995	0.625126	658	736	1396	0.527221	2142	2660	4805	0.553936	0.539743	0.568063	0.553878	0.539791	0.567907		F
FAM50	LMx1B	9:126693213	G	delG	C7	6389	6323	12725	0.496896	4565	4914	9490	0.517808	5708	5669	11388	0.497805	16662	16906	33603	0.503634	0.498271	0.508997	0.50357	0.49822	0.508919		F
FAM50	LMx1B	9:126693213	G	delG	F1	8420	0	8440	0	10695	1	10726	9.32314e-05	NA	NA	NA	NA	19115	1	19166	5.23122e-05	1.32443e-06	0.00029143	9.35885e-17	0	0.000145669		F
FAM50	LMx1B	9:126693213	G	delG	F2	10888	1	10911	9.16506e-05	11034	3	11071	0.000270978	9040	1	9072	0.000110229	30962	5	31054	0.000161462	5.24283e-05	0.000376758	4.07084e-05	0	0.000234194		F
FAM50	LMx1B	9:126693213	G	delG	F3	12927	0	12952	0	12029	1	12057	8.29394e-05	10948	0	10969	0	35904	1	35978	2.78513e-05	7.05133e-07	0.000155167	1.44382e-16	0	6.92016e-05		F
FAM50	LMx1B	9:126693213	G	delG	F4	7984	0	8015	0	9866	0	9882	0	9682	0	9708	0	27532	0	27605	0	0	0.000133976	0	0	4.91333e-05		F
FAM50	LMx1B	9:126693213	G	delG	F5	128	0	128	0	123	0	124	0	121	0	121	0	372	0	373	0	0	0.00986734	0	0	0.00362988		F
FAM50	LMx1B	9:126693213	G	delG	F6	14449	1	14477	6.90751e-05	10872	0	10898	0	11902	2	11942	0.000167476	37223	3	37317	8.05888e-05	1.66197e-05	0.000235497	8.55609e-17	0	0.000110722		F
FAM50	LMx1B	9:126693213	G	delG	M1	7323	1420	8766	0.16199	3967	769	4746	0.162031	3622	753	4388	0.171604	14912	2942	17900	0.164781	0.159366	0.170305	0.164672	0.159278	0.170163		F
FAM50	LMx1B	9:126693213	G	delG	M2	9082	1267	10366	0.122227	4923	676	5606	0.120585	6056	922	6992	0.131865	20061	2865	22964	0.124967	0.120713	0.129317	0.124853	0.120614	0.129177		F
FAM50	LMx1B	9:126693213	G	delG	M3	NA	NA	NA	NA	2429	287	2723	0.105398	7099	748	7860	0.0951654	9528	1035	10583	0.0979835	0.0923782	0.103812	0.0978662	0.0922931	0.103634		F
FAM50	LMx1B	9:126693213	G	delG	M4	6381	948	7340	0.129155	6550	1014	7578	0.133808	8106	1232	9354	0.131708	21037	3194	24272	0.131815	0.127579	0.136139	0.131702	0.12748	0.136001		F
FAM50	LMx1B	9:126693213	G	delG	M5	1263	304	1571	0.193507	8551	2068	10643	0.194306	8488	2122	10622	0.199774	18302	4494	22836	0.19714	0.191992	0.202365	0.197035	0.191904	0.202235		F
FAM50	LMx1B	9:126693213	G	delG	Control1	5648	0	5667	0	7082	4	7108	0.000562746	4135	1	4140	0.000241546	16865	5	16915	0.000296384	9.62419e-05	0.000691525	NA	NA	NA		F
FAM50	LMx1B	9:126693213	G	delG	Control2	12899	3	12939	0.000231857	10290	0	10309	0	9755	0	9781	0	32944	3	33029	9.10553e-05	1.87782e-05	0.000266079	NA	NA	NA		F
FAM50	LMx1B	9:126693213	G	delG	Control3	11204	0	11228	0	13248	1	13285	7.52729e-05	10265	1	10295	9.71345e-05	34717	2	34808	5.76053e-05	6.97635e-06	0.000208075	NA	NA	NA		F
FAM51	SCN1A	2:166037862	C	T	C1	2107	2035	4143	0.49119	1865	1927	3793	0.508041	2985	2970	5959	0.498406	6957	6932	13895	0.4991	0.49075	0.507451	0.499056	0.490741	0.507372		A
FAM51	SCN1A	2:166037862	C	T	C2	2177	2112	4292	0.492078	1999	1989	3989	0.498621	927	1009	1936	0.521178	5103	5110	10217	0.500343	0.490598	0.510087	0.500299	0.490602	0.509996		A
FAM51	SCN1A	2:166037862	C	T	C7	3620	3602	7227	0.498409	2394	2560	4957	0.516441	3631	3450	7083	0.487082	9645	9612	19267	0.499143	0.492056	0.506231	0.499099	0.492037	0.506162		A
FAM51	SCN1A	2:166037862	C	T	F1	3953	0	3955	0	1916	0	1918	0	2786	0	2788	0	8655	0	8661	0	0	0.000426123	0	0	0.000156287		A
FAM51	SCN1A	2:166037862	C	T	F2	7410	0	7414	0	4315	0	4322	0	6185	0	6193	0	17910	0	17929	0	0	0.000205946	0	0	7.55288e-05		A
FAM51	SCN1A	2:166037862	C	T	F3	5497	3	5505	0.000544959	6343	0	6344	0	3863	0	3869	0	15703	3	15718	0.00019101	3.93925e-05	0.000558109	0.000111356	0	0.00041921		A
FAM51	SCN1A	2:166037862	C	T	F4	7684	0	7693	0	7921	0	7926	0	5992	1	5999	0.000166694	21597	1	21618	4.63006e-05	1.17223e-06	0.000257943	7.43279e-17	0	0.000143643		A
FAM51	SCN1A	2:166037862	C	T	F5	NA	NA	NA	NA	NA	NA	NA	NA	NA	NA	NA	NA	NA	NA	NA	NA	NA	NA	NA	NA	NA		A
FAM51	SCN1A	2:166037862	C	T	F6	6939	1	6949	0.000143906	4764	0	4765	0	6034	0	6042	0	17737	1	17756	5.63761e-05	1.42732e-06	0.000314067	1.06609e-16	0	0.000182499		A
FAM51	SCN1A	2:166037862	C	T	M1	4436	1	4441	0.000225175	4053	0	4055	0	6634	0	6639	0	15123	1	15135	6.61201e-05	1.67401e-06	0.000368342	1.30926e-16	0	0.000221952		A
FAM51	SCN1A	2:166037862	C	T	M2	5304	1	5311	0.000188288	9531	0	9540	0	5363	0	5366	0	20198	1	20217	4.95074e-05	1.25342e-06	0.000275806	8.46022e-17	0	0.00015578		A
FAM51	SCN1A	2:166037862	C	T	M3	3363	1	3367	0.000297	0	0	0	NA	3000	0	3002	0	6363	1	6369	0.000157134	3.97828e-06	0.00087518	7.83267e-05	0	0.000612914		A
FAM51	SCN1A	2:166037862	C	T	M4	5142	0	5144	0	9939	1	9945	0.000100553	7894	0	7899	0	22975	1	22988	4.35237e-05	1.10192e-06	0.000242474	1.39446e-16	0	0.000133316		A
FAM51	SCN1A	2:166037862	C	T	M5	3527	0	3528	0	4673	0	4674	0	7048	0	7052	0	15248	0	15254	0	0	0.000241896	0	0	8.8714e-05		A
FAM51	SCN1A	2:166037862	C	T	Control1	9168	1	9170	0.000109051	4392	0	4393	0	7000	0	7007	0	20560	1	20570	4.86358e-05	1.23135e-06	0.000270951	NA	NA	NA		A
FAM51	SCN1A	2:166037862	C	T	Control2	5536	0	5541	0	6319	1	6324	0.000158128	4277	2	4286	0.000466636	16132	3	16151	0.000185931	3.83451e-05	0.000543273	NA	NA	NA		A
FAM51	SCN1A	2:166037862	C	T	Control3	8554	0	8560	0	5086	0	5093	0	6740	0	6742	0	20380	0	20395	0	0	0.000180988	NA	NA	NA		A
FAM53	COL1A1	17:50188538	C	T	C1	NA	NA	NA	NA	NA	NA	NA	NA	NA	NA	NA	NA	NA	NA	NA	NA	NA	NA	NA	NA	NA		D/E
FAM53	COL1A1	17:50188538	C	T	C2	NA	NA	NA	NA	NA	NA	NA	NA	NA	NA	NA	NA	NA	NA	NA	NA	NA	NA	NA	NA	NA		D/E
FAM53	COL1A1	17:50188538	C	T	C7	5263	5477	10754	0.509299	1474	1684	3163	0.532406	1747	1985	3737	0.531175	8484	9146	17654	0.518775	0.511368	0.526175	0.518727	0.511348	0.526101		D/E
FAM53	COL1A1	17:50188538	C	T	F1	3546	0	3551	0	3205	2	3211	0.000622859	2683	0	2686	0	9434	2	9448	0.000211954	2.56697e-05	0.00076544	0.000147663	0	0.000594765		D/E
FAM53	COL1A1	17:50188538	C	T	F2	4038	1	4051	0.000246853	3517	1	3523	0.000283849	2731	1	2736	0.000365497	10286	3	10310	0.000291574	6.01335e-05	0.000851863	0.000222345	0	0.000693748		D/E
FAM53	COL1A1	17:50188538	C	T	F3	2480	1	2484	0.000402576	5916	2	5930	0.000337268	2977	1	2980	0.00033557	11373	4	11394	0.000351587	9.58035e-05	0.000899954	0.000279986	0	0.000753573		D/E
FAM53	COL1A1	17:50188538	C	T	F4	5719	0	5727	0	5677	0	5687	0	7320	1	7326	0.0001365	18716	1	18740	5.34274e-05	1.35266e-06	0.000297642	1.87467e-05	0	0.000200546		D/E
FAM53	COL1A1	17:50188538	C	T	F5	NA	NA	NA	NA	NA	NA	NA	NA	NA	NA	NA	NA	NA	NA	NA	NA	NA	NA	NA	NA	NA		D/E
FAM53	COL1A1	17:50188538	C	T	F6	3441	0	3450	0	5603	0	5618	0	2952	1	2956	0.000338295	11996	1	12024	8.33542e-05	2.11034e-06	0.000464331	3.81357e-05	0	0.000321752		D/E
FAM53	COL1A1	17:50188538	C	T	M1	2919	0	2926	0	1244	0	1244	0	491	0	491	0	4654	0	4661	0	0	0.000792312	0	0	0.000290626		D/E
FAM53	COL1A1	17:50188538	C	T	M2	3038	1	3043	0.000328623	2596	0	2600	0	379	0	380	0	6013	1	6023	0.000166279	4.2098e-06	0.000926093	0.000104293	0	0.00066997		D/E
FAM53	COL1A1	17:50188538	C	T	M3	6462	0	6467	0	3588	1	3597	0.000278009	3385	0	3393	0	13435	1	13457	7.44269e-05	1.88432e-06	0.00041461	3.19708e-05	0	0.000285216		D/E
FAM53	COL1A1	17:50188538	C	T	M4	6515	2	6529	0.000306326	8336	2	8355	0.000239378	5886	2	5899	0.000339041	20737	6	20783	0.000289254	0.000106158	0.000629478	0.000225037	0	0.000533126		D/E
FAM53	COL1A1	17:50188538	C	T	M5	1911	0	1915	0	374	0	377	0	393	0	393	0	2678	0	2685	0	0	0.00137653	0	0	0.000505015		D/E
FAM53	COL1A1	17:50188538	C	T	Control1	2086	0	2095	0	686	0	686	0	1326	0	1327	0	4098	0	4108	0	0	0.000899761	NA	NA	NA		D/E
FAM53	COL1A1	17:50188538	C	T	Control2	1971	0	1976	0	1546	0	1547	0	1317	0	1320	0	4834	0	4843	0	0	0.00076282	NA	NA	NA		D/E
FAM53	COL1A1	17:50188538	C	T	Control3	630	0	630	0	383	0	384	0	171	0	171	0	1184	0	1185	0	0	0.00311076	NA	NA	NA		D/E
FAM54	MAGEL2	15:23645482-23645516	GCAGCA[23bp]GGCCCT	Dup	C1	NA	NA	NA	NA	NA	NA	NA	NA	NA	NA	NA	NA	NA	NA	NA	NA	NA	NA	NA	NA	NA		A
FAM54	MAGEL2	15:23645482-23645516	GCAGCA[23bp]GGCCCT	Dup	C2	NA	NA	NA	NA	NA	NA	NA	NA	NA	NA	NA	NA	NA	NA	NA	NA	NA	NA	NA	NA	NA		A
FAM54	MAGEL2	15:23645482-23645516	GCAGCA[23bp]GGCCCT	Dup	C7	NA	NA	NA	NA	NA	NA	NA	NA	NA	NA	NA	NA	NA	NA	NA	NA	NA	NA	NA	NA	NA		A
FAM54	MAGEL2	15:23645482-23645516	GCAGCA[23bp]GGCCCT	Dup	F1	NA	NA	NA	NA	NA	NA	NA	NA	NA	NA	NA	NA	NA	NA	NA	NA	NA	NA	NA	NA	NA		A
FAM54	MAGEL2	15:23645482-23645516	GCAGCA[23bp]GGCCCT	Dup	F2	NA	NA	NA	NA	NA	NA	NA	NA	NA	NA	NA	NA	NA	NA	NA	NA	NA	NA	NA	NA	NA		A
FAM54	MAGEL2	15:23645482-23645516	GCAGCA[23bp]GGCCCT	Dup	F3	NA	NA	NA	NA	NA	NA	NA	NA	NA	NA	NA	NA	NA	NA	NA	NA	NA	NA	NA	NA	NA		A
FAM54	MAGEL2	15:23645482-23645516	GCAGCA[23bp]GGCCCT	Dup	F4	NA	NA	NA	NA	NA	NA	NA	NA	NA	NA	NA	NA	NA	NA	NA	NA	NA	NA	NA	NA	NA		A
FAM54	MAGEL2	15:23645482-23645516	GCAGCA[23bp]GGCCCT	Dup	F5	NA	NA	NA	NA	NA	NA	NA	NA	NA	NA	NA	NA	NA	NA	NA	NA	NA	NA	NA	NA	NA		A
FAM54	MAGEL2	15:23645482-23645516	GCAGCA[23bp]GGCCCT	Dup	F6	NA	NA	NA	NA	NA	NA	NA	NA	NA	NA	NA	NA	NA	NA	NA	NA	NA	NA	NA	NA	NA		A
FAM54	MAGEL2	15:23645482-23645516	GCAGCA[23bp]GGCCCT	Dup	M1	NA	NA	NA	NA	NA	NA	NA	NA	NA	NA	NA	NA	NA	NA	NA	NA	NA	NA	NA	NA	NA		A
FAM54	MAGEL2	15:23645482-23645516	GCAGCA[23bp]GGCCCT	Dup	M2	NA	NA	NA	NA	NA	NA	NA	NA	NA	NA	NA	NA	NA	NA	NA	NA	NA	NA	NA	NA	NA		A
FAM54	MAGEL2	15:23645482-23645516	GCAGCA[23bp]GGCCCT	Dup	M3	NA	NA	NA	NA	NA	NA	NA	NA	NA	NA	NA	NA	NA	NA	NA	NA	NA	NA	NA	NA	NA		A
FAM54	MAGEL2	15:23645482-23645516	GCAGCA[23bp]GGCCCT	Dup	M4	NA	NA	NA	NA	NA	NA	NA	NA	NA	NA	NA	NA	NA	NA	NA	NA	NA	NA	NA	NA	NA		A
FAM54	MAGEL2	15:23645482-23645516	GCAGCA[23bp]GGCCCT	Dup	M5	NA	NA	NA	NA	NA	NA	NA	NA	NA	NA	NA	NA	NA	NA	NA	NA	NA	NA	NA	NA	NA		A
FAM54	MAGEL2	15:23645482-23645516	GCAGCA[23bp]GGCCCT	Dup	Control1	NA	NA	NA	NA	NA	NA	NA	NA	NA	NA	NA	NA	NA	NA	NA	NA	NA	NA	NA	NA	NA		A
FAM54	MAGEL2	15:23645482-23645516	GCAGCA[23bp]GGCCCT	Dup	Control2	NA	NA	NA	NA	NA	NA	NA	NA	NA	NA	NA	NA	NA	NA	NA	NA	NA	NA	NA	NA	NA		A
FAM54	MAGEL2	15:23645482-23645516	GCAGCA[23bp]GGCCCT	Dup	Control3	NA	NA	NA	NA	NA	NA	NA	NA	NA	NA	NA	NA	NA	NA	NA	NA	NA	NA	NA	NA	NA		A
FAM55	STXBP1	9:127680243	G	A	C1	138	150	288	0.520833	180	129	309	0.417476	562	485	1047	0.463228	880	764	1644	0.46472	0.440388	0.489178	0.464681	0.440639	0.488833		A
FAM55	STXBP1	9:127680243	G	A	C2	738	710	1448	0.490331	781	691	1472	0.469429	1160	1009	2169	0.465191	2679	2410	5089	0.47357	0.459773	0.487399	0.473532	0.459829	0.487262		A
FAM55	STXBP1	9:127680243	G	A	C7	505	467	972	0.480453	632	604	1236	0.488673	1031	861	1892	0.455074	2168	1932	4100	0.47122	0.455843	0.486637	0.471181	0.455922	0.486476		A
FAM55	STXBP1	9:127680243	G	A	F1	1167	0	1167	0	420	0	420	0	1284	0	1284	0	2871	0	2871	0	0	0.00128405	0	0	0.000471074		A
FAM55	STXBP1	9:127680243	G	A	F2	1555	0	1556	0	876	0	876	0	1456	0	1456	0	3887	0	3888	0	0	0.00094858	0	0	0.000347964		A
FAM55	STXBP1	9:127680243	G	A	F3	821	0	821	0	2471	1	2472	0.000404531	509	1	510	0.00196078	3801	2	3803	0.000525901	6.36953e-05	0.00189843	0.00046271	4.37003e-06	0.00156201		A
FAM55	STXBP1	9:127680243	G	A	F4	1400	1	1401	0.000713776	585	0	585	0	1044	0	1044	0	3029	1	3030	0.000330033	8.35568e-06	0.00183744	0.000270451	0	0.00139281		A
FAM55	STXBP1	9:127680243	G	A	F5	99	0	99	0	91	0	91	0	NA	NA	NA	NA	NA	NA	NA	NA	NA	NA	NA	NA	NA		A
FAM55	STXBP1	9:127680243	G	A	F6	53453	4	53466	7.48139e-05	51514	4	51524	7.76337e-05	54655	0	54661	0	159622	8	159651	5.01159e-05	2.16367e-05	9.87459e-05	2.99491e-05	0	7.96779e-05		A
FAM55	STXBP1	9:127680243	G	A	M1	557	0	557	0	1708	0	1708	0	614	1	615	0.00162602	2879	1	2880	0.000347222	8.79087e-06	0.00193306	0.000287104	0	0.00146788		A
FAM55	STXBP1	9:127680243	G	A	M2	1281	0	1281	0	1276	0	1277	0	1055	0	1055	0	3612	0	3613	0	0	0.00102076	0	0	0.000374451		A
FAM55	STXBP1	9:127680243	G	A	M3	1236	1	1237	0.000808407	1536	0	1536	0	1739	0	1740	0	4511	1	4513	0.000221631	5.6112e-06	0.00123422	0.000166879	0	0.000920768		A
FAM55	STXBP1	9:127680243	G	A	M4	327	0	327	0	291	0	291	0	278	0	278	0	896	0	896	0	0	0.00410859	0	0	0.00150865		A
FAM55	STXBP1	9:127680243	G	A	M5	86	0	86	0	173	0	173	0	90	0	90	0	349	0	350	0	0	0.0105142	0	0	0.00386863		A
FAM55	STXBP1	9:127680243	G	A	Control1	1338	0	1339	0	1278	0	1278	0	1362	0	1362	0	3978	0	3979	0	0	0.00092689	NA	NA	NA		A
FAM55	STXBP1	9:127680243	G	A	Control2	1688	0	1688	0	1206	0	1206	0	1551	0	1551	0	4445	0	4445	0	0	0.00082955	NA	NA	NA		A
FAM55	STXBP1	9:127680243	G	A	Control3	1732	0	1732	0	1775	0	1775	0	1818	0	1818	0	5325	0	5325	0	0	0.000692507	NA	NA	NA		A
FAM56	RANBP2	2:108751993	C	T	C1	NA	NA	NA	NA	NA	NA	NA	NA	NA	NA	NA	NA	NA	NA	NA	NA	NA	NA	NA	NA	NA		D/E
FAM56	RANBP2	2:108751993	C	T	C2	NA	NA	NA	NA	NA	NA	NA	NA	NA	NA	NA	NA	NA	NA	NA	NA	NA	NA	NA	NA	NA		D/E
FAM56	RANBP2	2:108751993	C	T	C7	1198	885	2084	0.424664	929	828	1757	0.471258	1075	1059	2134	0.496251	3202	2772	5975	0.464011	0.451301	0.476756	0.462633	0.449965	0.475331		D/E
FAM56	RANBP2	2:108751993	C	T	F1	NA	NA	NA	NA	1730	0	1732	0	1235	4	1239	0.00322841	2965	4	2971	0.00134725	0.0003672	0.00344588	7.46526e-17	0	0.00121882		D/E
FAM56	RANBP2	2:108751993	C	T	F2	1917	1	1920	0.000520833	2075	1	2078	0.000481232	NA	NA	NA	NA	3992	2	3998	0.000500751	6.0649e-05	0.0018077	1.44665e-16	0	0.000607234		D/E
FAM56	RANBP2	2:108751993	C	T	F3	2081	7	2088	0.00335249	1949	1	1952	0.000512295	2211	6	2217	0.00270636	6241	14	6257	0.00223821	0.00122417	0.00375249	7.8629e-17	0	0.00130082		D/E
FAM56	RANBP2	2:108751993	C	T	F4	1585	0	1585	0	1215	1	1216	0.000822368	1324	0	1327	0	4124	1	4128	0.000242424	6.13763e-06	0.00134995	1.0934e-16	0	0.000520104		D/E
FAM56	RANBP2	2:108751993	C	T	F5	264	0	264	0	0	0	0	NA	216	0	217	0	480	0	481	0	0	0.00765571	0	0	0.00281431		D/E
FAM56	RANBP2	2:108751993	C	T	F6	2156	2	2163	0.000924642	0	0	0	NA	2090	15	2107	0.00711913	4246	17	4270	0.0039878	0.00232471	0.0063772	0.00146753	0	0.00377192		D/E
FAM56	RANBP2	2:108751993	C	T	M1	1788	6	1798	0.00333704	1306	1	1310	0.000763359	1310	2	1313	0.00152323	4404	9	4421	0.00203943	0.000932968	0.00386793	1.39087e-16	0	0.00138466		D/E
FAM56	RANBP2	2:108751993	C	T	M2	2784	5	2790	0.00179211	1744	3	1748	0.00171625	1579	1	1582	0.000632111	6107	9	6120	0.00147155	0.0006731	0.00279161	8.83684e-17	0	0.000747239		D/E
FAM56	RANBP2	2:108751993	C	T	M3	2622	7	2634	0.00265756	1355	2	1361	0.00146951	1414	0	1414	0	5391	9	5409	0.00166667	0.00076238	0.00316148	1.09899e-16	0	0.00093651		D/E
FAM56	RANBP2	2:108751993	C	T	M4	1764	4	1769	0.00226116	1592	2	1595	0.00125392	1502	0	1503	0	4858	6	4867	0.00123355	0.000452822	0.00268298	1.36121e-16	0	0.00076436		D/E
FAM56	RANBP2	2:108751993	C	T	M5	2369	8	2378	0.00336417	NA	NA	NA	NA	NA	NA	NA	NA	2369	8	2378	0.00336559	0.00145411	0.00662072	0.000849056	0	0.00381435		D/E
FAM56	RANBP2	2:108751993	C	T	Control1	1576	2	1580	0.00126582	1823	1	1826	0.000547645	1675	2	1679	0.00119119	5074	5	5085	0.000984446	0.000319722	0.00229586	NA	NA	NA		D/E
FAM56	RANBP2	2:108751993	C	T	Control2	1947	9	1957	0.00459888	1646	2	1649	0.00121286	1895	0	1897	0	5488	11	5503	0.00200036	0.000998984	0.00357638	NA	NA	NA		D/E
FAM56	RANBP2	2:108751993	C	T	Control3	1898	8	1907	0.00419507	2224	6	2232	0.00268817	2040	12	2052	0.00584795	6162	26	6191	0.00420168	0.00274646	0.00615042	NA	NA	NA		D/E
FAM57	CTBP1	4:1213028	G	A	C1	3575	3755	7333	0.512069	3576	3673	7253	0.506411	4477	4513	8995	0.501723	11628	11941	23581	0.50664	0.500236	0.513043	0.506441	0.500054	0.512826		A
FAM57	CTBP1	4:1213028	G	A	C2	1649	1547	3199	0.483589	3066	3299	6373	0.517653	1504	1715	3221	0.532443	6219	6561	12793	0.51338	0.504673	0.522081	0.513184	0.504512	0.52185		A
FAM57	CTBP1	4:1213028	G	A	C7	6127	6848	12979	0.527622	6029	6743	12785	0.527415	6488	6996	13488	0.518683	18644	20587	39252	0.524764	0.519808	0.529716	0.524572	0.519626	0.529514		A
FAM57	CTBP1	4:1213028	G	A	F1	9876	5	9899	0.000505102	4513	1	4519	0.000221288	12708	7	12731	0.000549839	27097	13	27149	0.000479528	0.000255352	0.000819868	8.90279e-05	0	0.000424788		A
FAM57	CTBP1	4:1213028	G	A	F2	7396	4	7410	0.000539811	3772	0	3777	0	8074	3	8090	0.000370828	19242	7	19277	0.000363655	0.00014622	0.000749124	9.59735e-17	0	0.000338559		A
FAM57	CTBP1	4:1213028	G	A	F3	1221	1	1222	0.000818331	2553	3	2559	0.00117233	NA	NA	NA	NA	3774	4	3781	0.00105876	0.00028855	0.00270861	0.000661144	0	0.00206556		A
FAM57	CTBP1	4:1213028	G	A	F4	4580	1	4587	0.000218007	6365	2	6373	0.000313824	13648	3	13672	0.000219427	24593	6	24632	0.000243912	8.95166e-05	0.000530818	1.10466e-16	0	0.000184096		A
FAM57	CTBP1	4:1213028	G	A	F5	2396	1	2399	0.00041684	NA	NA	NA	NA	3002	0	3013	0	5398	1	5412	0.000185219	4.68934e-06	0.00103154	1.40089e-16	0	0.000516827		A
FAM57	CTBP1	4:1213028	G	A	F6	19500	3	19513	0.000153744	22105	3	22115	0.000135655	14180	1	14182	7.05119e-05	55785	7	55810	0.000125466	5.04453e-05	0.000258491	7.95283e-17	0	6.05138e-05		A
FAM57	CTBP1	4:1213028	G	A	M1	10482	6	10502	0.00057132	6045	7	6061	0.00115492	7732	2	7751	0.000258031	24259	15	24314	0.000617945	0.000345899	0.001019	0.000225055	0	0.000615248		A
FAM57	CTBP1	4:1213028	G	A	M2	5035	2	5048	0.000396197	2585	0	2589	0	4418	1	4422	0.000226142	12038	3	12059	0.000249149	5.13834e-05	0.000727944	1.14426e-16	0	0.000316708		A
FAM57	CTBP1	4:1213028	G	A	M3	10243	3	10268	0.00029217	5618	3	5626	0.000533239	6349	3	6361	0.000471624	22210	9	22255	0.000405059	0.000185235	0.000768788	1.62461e-05	0	0.000364869		A
FAM57	CTBP1	4:1213028	G	A	M4	2302	3	2308	0.00129983	4992	4	5000	0.0008	13853	7	13892	0.000503887	21147	14	21200	0.000661594	0.000361746	0.00110979	0.000268018	0	0.000697921		A
FAM57	CTBP1	4:1213028	G	A	M5	7348	0	7357	0	NA	NA	NA	NA	9769	4	9790	0.00040858	17117	4	17147	0.000233631	6.36602e-05	0.00059808	1.0269e-16	0	0.000231081		A
FAM57	CTBP1	4:1213028	G	A	Control1	3336	2	3345	0.000597907	4175	0	4182	0	3437	1	3442	0.000290529	10948	3	10969	0.000273948	5.64981e-05	0.00080038	NA	NA	NA		A
FAM57	CTBP1	4:1213028	G	A	Control2	9411	2	9425	0.000212202	6161	1	6175	0.000161943	8319	5	8336	0.000599808	23891	8	23936	0.000334742	0.000144529	0.000659468	NA	NA	NA		A
FAM57	CTBP1	4:1213028	G	A	Control3	10251	3	10271	0.000292085	8154	2	8170	0.000244798	11107	9	11128	0.000808771	29512	14	29569	0.000474158	0.00025925	0.000795429	NA	NA	NA		A
FAM58	GRIN2B	12:13615140	C	A	C1	2380	2596	4977	0.521599	2876	3338	6216	0.537001	2426	2545	4972	0.511866	7682	8479	16165	0.524658	0.516924	0.532383	0.524297	0.516587	0.531999		C
FAM58	GRIN2B	12:13615140	C	A	C2	2260	2183	4443	0.491335	2992	2628	5623	0.467366	922	888	1810	0.490608	6174	5699	11876	0.479997	0.470974	0.489029	0.479601	0.470612	0.488599		C
FAM58	GRIN2B	12:13615140	C	A	C7	3252	3628	6880	0.527326	3247	3647	6894	0.529011	3094	3488	6586	0.529608	9593	10763	20360	0.528738	0.521853	0.535616	0.52838	0.521513	0.53524		C
FAM58	GRIN2B	12:13615140	C	A	F1	1988	3	1991	0.00150678	2	0	2	0	2985	4	2990	0.00133779	4975	7	4983	0.00140506	0.000565087	0.0028928	0.000658952	0	0.00198759		C
FAM58	GRIN2B	12:13615140	C	A	F2	5776	7	5784	0.00121024	1652	3	1655	0.00181269	5664	9	5675	0.0015859	13092	19	13114	0.00144916	0.00087271	0.00226213	0.000703631	7.66683e-05	0.00149003		C
FAM58	GRIN2B	12:13615140	C	A	F3	2106	2	2109	0.000948317	1371	0	1372	0	1031	2	1033	0.00193611	4508	4	4514	0.000886525	0.000241599	0.00226829	0.000146918	0	0.00133549		C
FAM58	GRIN2B	12:13615140	C	A	F4	3539	14	3553	0.00394033	1003	7	1011	0.00692384	1798	10	1808	0.00553097	6340	31	6372	0.0048658	0.0033084	0.00689956	0.00411326	0.00257119	0.00604255		C
FAM58	GRIN2B	12:13615140	C	A	F5	2838	35	2875	0.0121739	269	6	275	0.0218182	2465	18	2486	0.00724055	5572	59	5636	0.0104777	0.00798542	0.0134949	0.00972724	0.00726884	0.0126259		C
FAM58	GRIN2B	12:13615140	C	A	F6	4080	568	4651	0.122124	744	113	858	0.131702	5513	756	6270	0.120574	10337	1437	11779	0.122049	0.116187	0.128097	0.121381	0.115542	0.127385		C
FAM58	GRIN2B	12:13615140	C	A	M1	3547	4	3552	0.00112613	6323	4	6328	0.000632111	4685	4	4689	0.00085306	14555	12	14569	0.00082378	0.000425729	0.00143853	8.58862e-05	0	0.000685712		C
FAM58	GRIN2B	12:13615140	C	A	M2	5211	5	5216	0.000958589	5037	7	5046	0.00138724	4128	2	4131	0.000484144	14376	14	14393	0.000972898	0.000531991	0.00163182	0.000232463	0	0.000874643		C
FAM58	GRIN2B	12:13615140	C	A	M3	990	1	991	0.00100908	5414	9	5428	0.00165807	4962	1	4964	0.00020145	11366	11	11383	0.000966863	0.00048275	0.00172932	0.000226318	0	0.000949512		C
FAM58	GRIN2B	12:13615140	C	A	M4	2244	3	2248	0.00133452	5904	5	5909	0.000846167	5777	2	5782	0.000345901	13925	10	13939	0.000717618	0.000344177	0.00131933	1.28129e-16	0	0.000565574		C
FAM58	GRIN2B	12:13615140	C	A	M5	5292	5	5299	0.000943574	1	0	1	0	1645	2	1649	0.00121286	6938	7	6949	0.00100792	0.000405329	0.00207559	0.0002664	0	0.00123101		C
FAM58	GRIN2B	12:13615140	C	A	Control1	6525	4	6531	0.000612464	6210	5	6216	0.000804376	4899	2	4902	0.000407997	17634	11	17649	0.000623406	0.000311242	0.00111517	NA	NA	NA		C
FAM58	GRIN2B	12:13615140	C	A	Control2	5591	7	5601	0.00124978	6350	4	6356	0.000629327	5637	5	5642	0.000886211	17578	16	17599	0.000909401	0.000519888	0.00147639	NA	NA	NA		C
FAM58	GRIN2B	12:13615140	C	A	Control3	NA	NA	NA	NA	NA	NA	NA	NA	6874	4	6879	0.00058148	6874	4	6879	0.000581564	0.000158479	0.00148836	NA	NA	NA		C
FAM59	SALL4	20:51791518	C	delC	C1	1603	1610	3214	0.500933	1412	1422	2834	0.501764	1123	1154	2278	0.506585	4138	4186	8326	0.502883	0.492083	0.513682	0.502785	0.492042	0.513526		A/D/E
FAM59	SALL4	20:51791518	C	delC	C2	2381	2577	4959	0.519661	3269	3550	6822	0.520375	2452	2562	5015	0.510867	8102	8689	16796	0.51748	0.509889	0.525064	0.517384	0.509822	0.524941		A/D/E
FAM59	SALL4	20:51791518	C	delC	C7	3068	3354	6422	0.522267	2498	2578	5078	0.50768	3366	3452	6819	0.506233	8932	9384	18319	0.512339	0.505071	0.519603	0.512243	0.505	0.519481		A/D/E
FAM59	SALL4	20:51791518	C	delC	F1	734	1	737	0.00135685	6750	2	6754	0.000296121	5384	0	5385	0	12868	3	12876	0.000233082	4.80697e-05	0.000681012	6.589e-05	0	0.00045006		A/D/E
FAM59	SALL4	20:51791518	C	delC	F2	0	0	0	NA	7030	1	7032	0.000142248	4214	0	4216	0	11244	1	11248	8.89284e-05	2.25147e-06	0.000495377	1.02074e-16	0	0.000267079		A/D/E
FAM59	SALL4	20:51791518	C	delC	F3	NA	NA	NA	NA	NA	NA	NA	NA	NA	NA	NA	NA	NA	NA	NA	NA	NA	NA	NA	NA	NA		A/D/E
FAM59	SALL4	20:51791518	C	delC	F4	914	0	914	0	7935	2	7940	0.000251889	6254	1	6256	0.000159847	15103	3	15110	0.000198597	4.09573e-05	0.000580273	3.52051e-05	0	0.000366153		A/D/E
FAM59	SALL4	20:51791518	C	delC	F5	NA	NA	NA	NA	NA	NA	NA	NA	NA	NA	NA	NA	NA	NA	NA	NA	NA	NA	NA	NA	NA		A/D/E
FAM59	SALL4	20:51791518	C	delC	F6	458	0	458	0	5225	4	5230	0.000764818	1954	2	1956	0.00102249	7637	6	7644	0.000785032	0.000288146	0.0017079	0.000598554	8.86793e-05	0.00141367		A/D/E
FAM59	SALL4	20:51791518	C	delC	M1	4997	1	5000	0.0002	4978	1	4979	0.000200844	3323	1	3324	0.000300842	13298	3	13303	0.000225547	4.65156e-05	0.000659001	5.91249e-05	0	0.000431622		A/D/E
FAM59	SALL4	20:51791518	C	delC	M2	4210	3	4214	0.000711913	7350	0	7351	0	3957	0	3957	0	15517	3	15522	0.000193299	3.98647e-05	0.000564797	3.05561e-05	0	0.000353383		A/D/E
FAM59	SALL4	20:51791518	C	delC	M3	2449	0	2449	0	4341	2	4344	0.000460405	1538	1	1540	0.000649351	8328	3	8333	0.000360101	7.42676e-05	0.001052	0.000183682	0	0.000766506		A/D/E
FAM59	SALL4	20:51791518	C	delC	M4	6047	2	6052	0.000330469	4477	1	4479	0.000223264	125	0	125	0	10649	3	10656	0.000281637	5.80841e-05	0.000822841	0.000110181	0	0.000569962		A/D/E
FAM59	SALL4	20:51791518	C	delC	M5	8525	1	8528	0.000117261	7393	0	7398	0	NA	NA	NA	NA	15918	1	15926	6.2818e-05	1.59041e-06	0.000349949	1.24387e-16	0	0.000177236		A/D/E
FAM59	SALL4	20:51791518	C	delC	Control1	4856	1	4857	0.000205888	3802	1	3805	0.000262812	4462	0	4462	0	13120	2	13124	0.000152416	1.84588e-05	0.000550469	NA	NA	NA		A/D/E
FAM59	SALL4	20:51791518	C	delC	Control2	2355	1	2356	0.000424448	6353	1	6355	0.000157356	3483	0	3483	0	12191	2	12194	0.000164029	1.98652e-05	0.000592401	NA	NA	NA		A/D/E
FAM59	SALL4	20:51791518	C	delC	Control3	NA	NA	NA	NA	NA	NA	NA	NA	NA	NA	NA	NA	NA	NA	NA	NA	NA	NA	NA	NA	NA		A/D/E
FAM60	ZNF462	9:106927744	T	delT	C1	7162	7776	14946	0.520273	9672	10033	19716	0.508876	1735	1776	3511	0.505839	18569	19585	38173	0.513314	0.508285	0.518342	0.513209	0.508192	0.518225		F
FAM60	ZNF462	9:106927744	T	delT	C2	8521	8705	17235	0.505077	6131	6115	12251	0.499143	2781	3164	5947	0.532033	17433	17984	35433	0.507779	0.502558	0.512999	0.507672	0.502464	0.51288		F
FAM60	ZNF462	9:106927744	T	delT	C7	8442	8262	16716	0.494257	7086	7073	14165	0.499329	2924	2646	5574	0.474704	18452	17981	36455	0.493536	0.488389	0.498684	0.493427	0.488292	0.498562		F
FAM60	ZNF462	9:106927744	T	delT	F1	882	0	882	0	809	0	809	0	880	2	883	0.00226501	2571	2	2574	0.000777303	9.41488e-05	0.00280504	0.000564628	0	0.00218703		F
FAM60	ZNF462	9:106927744	T	delT	F2	297	0	299	0	734	0	736	0	158	0	158	0	1189	0	1193	0	0	0.0030977	0	0	0.00113709		F
FAM60	ZNF462	9:106927744	T	delT	F3	7353	0	7354	0	7154	1	7157	0.000139782	7782	3	7786	0.000385505	22289	4	22297	0.000179429	4.88903e-05	0.000459344	1.35709e-16	0	0.000227507		F
FAM60	ZNF462	9:106927744	T	delT	F4	NA	NA	NA	NA	NA	NA	NA	NA	NA	NA	NA	NA	NA	NA	NA	NA	NA	NA	NA	NA	NA		F
FAM60	ZNF462	9:106927744	T	delT	F5	1649	0	1650	0	1213	0	1215	0	1819	0	1821	0	4681	0	4686	0	0	0.000787743	0	0	0.00028895		F
FAM60	ZNF462	9:106927744	T	delT	F6	8710	4	8735	0.000457928	12879	2	12902	0.000155015	16421	5	16443	0.000304081	38010	11	38080	0.000289314	0.000144433	0.000517603	8.29407e-05	0	0.000304993		F
FAM60	ZNF462	9:106927744	T	delT	M1	2749	19	2772	0.00685426	3657	18	3680	0.0048913	20723	164	20909	0.00784351	27129	201	27361	0.00735456	0.00637593	0.00844	0.00714027	0.00616697	0.00820463		F
FAM60	ZNF462	9:106927744	T	delT	M2	1263	3	1269	0.00236407	5118	50	5173	0.00966557	8564	59	8636	0.00683187	14945	112	15078	0.0074384	0.00612858	0.00894355	0.00722408	0.00592954	0.00868502		F
FAM60	ZNF462	9:106927744	T	delT	M3	17518	491	18012	0.0274262	15587	447	16038	0.0281207	19443	606	20053	0.0304194	52548	1544	54103	0.028544	0.0271568	0.0299821	0.0283343	0.026969	0.0297233		F
FAM60	ZNF462	9:106927744	T	delT	M4	2707	87	2797	0.0311048	3339	103	3443	0.0299158	6877	217	7102	0.0305548	12923	407	13342	0.0305326	0.0276773	0.0335952	0.030323	0.0274896	0.0333365		F
FAM60	ZNF462	9:106927744	T	delT	M5	536	16	553	0.0289331	4054	147	4205	0.0349584	6214	214	6431	0.0332763	10804	377	11189	0.0337179	0.0304494	0.0372321	0.0335089	0.0302671	0.0369641		F
FAM60	ZNF462	9:106927744	T	delT	Control1	10821	3	10832	0.000276957	13507	5	13520	0.000369822	10306	0	10319	0	34634	8	34671	0.000230934	9.97058e-05	0.00045498	NA	NA	NA		F
FAM60	ZNF462	9:106927744	T	delT	Control2	524	0	526	0	3275	1	3279	0.000304971	10480	2	10501	0.000190458	14279	3	14306	0.000210055	4.33204e-05	0.000613745	NA	NA	NA		F
FAM60	ZNF462	9:106927744	T	delT	Control3	6257	4	6266	0.000638366	9521	1	9530	0.000104932	13880	0	13896	0	29658	5	29692	0.00016856	5.47332e-05	0.000393319	NA	NA	NA		F
FAM61	COL1A2	7:94420409	G	A	C1	NA	NA	NA	NA	NA	NA	NA	NA	NA	NA	NA	NA	NA	NA	NA	NA	NA	NA	NA	NA	NA		D/E
FAM61	COL1A2	7:94420409	G	A	C2	NA	NA	NA	NA	NA	NA	NA	NA	NA	NA	NA	NA	NA	NA	NA	NA	NA	NA	NA	NA	NA		D/E
FAM61	COL1A2	7:94420409	G	A	C7	158286	136938	295331	0.463676	65297	50933	116256	0.438111	119731	107893	227708	0.473822	343314	295764	639295	0.462798	0.461575	0.464021	0.462694	0.461472	0.463917		D/E
FAM61	COL1A2	7:94420409	G	A	F1	230863	28	230930	0.000121249	270742	45	270840	0.00016615	265089	38	265174	0.000143302	766694	111	766944	0.000144756	0.000119084	0.000174322	1.03136e-16	0	1.31997e-05		D/E
FAM61	COL1A2	7:94420409	G	A	F2	NA	NA	NA	NA	8821	2	8823	0.00022668	NA	NA	NA	NA	8821	2	8823	0.00022668	2.74532e-05	0.000818605	3.45699e-05	0	0.000507993		D/E
FAM61	COL1A2	7:94420409	G	A	F3	151489	65	151585	0.000428802	234907	55	234993	0.00023405	178940	40	179002	0.000223461	565336	160	565580	0.000282937	0.0002408	0.000330326	9.07629e-05	4.23366e-05	0.000142411		D/E
FAM61	COL1A2	7:94420409	G	A	F4	175223	17	175276	9.69899e-05	267217	58	267320	0.000216968	138853	12	138884	8.6403e-05	581293	87	581480	0.000149644	0.00011986	0.000184582	1.09117e-16	0	1.72857e-05		D/E
FAM61	COL1A2	7:94420409	G	A	F5	NA	NA	NA	NA	97200	19	97228	0.000195417	81339	6	81354	7.37518e-05	178539	25	178582	0.000140006	9.06064e-05	0.000206669	9.73219e-17	0	3.53236e-05		D/E
FAM61	COL1A2	7:94420409	G	A	F6	187968	28	188025	0.000148916	147977	32	148037	0.000216162	140323	17	140366	0.000121112	476268	77	476428	0.000161648	0.000127572	0.000202028	1.2226e-16	0	2.47631e-05		D/E
FAM61	COL1A2	7:94420409	G	A	M1	255664	35	255743	0.000136856	73314	31	73351	0.000422625	72480	7	72495	9.65584e-05	401458	73	401589	0.000181804	0.000142508	0.000228586	1.37506e-16	0	4.14509e-05		D/E
FAM61	COL1A2	7:94420409	G	A	M2	240150	37	240225	0.000154022	111561	15	111588	0.000134423	188026	22	188075	0.000116975	539737	74	539888	0.000137085	0.000107643	0.000172095	9.37475e-17	0	1.36124e-05		D/E
FAM61	COL1A2	7:94420409	G	A	M3	255877	63	255975	0.000246118	202365	40	202439	0.00019759	233878	38	233949	0.000162429	692120	141	692363	0.00020368	0.000171452	0.000240205	1.16567e-05	0	5.40303e-05		D/E
FAM61	COL1A2	7:94420409	G	A	M4	248174	43	248253	0.00017321	185081	40	185143	0.000216049	156394	23	156440	0.000147021	589649	106	589836	0.000179736	0.000147155	0.000217381	1.35941e-16	0	3.27124e-05		D/E
FAM61	COL1A2	7:94420409	G	A	M5	114906	32	114952	0.000278377	95990	12	96027	0.000124965	NA	NA	NA	NA	210896	44	210979	0.00020859	0.000151566	0.000280012	1.65425e-05	0	8.80847e-05		D/E
FAM61	COL1A2	7:94420409	G	A	Control1	196576	33	196647	0.000167813	47559	5	47572	0.000105104	126396	20	126431	0.000158189	370531	58	370650	0.000156508	0.000118845	0.000202318	NA	NA	NA		D/E
FAM61	COL1A2	7:94420409	G	A	Control2	242969	79	243128	0.000324932	97177	6	97198	6.17297e-05	94391	31	94440	0.000328251	434537	116	434766	0.00026688	0.000220533	0.000320088	NA	NA	NA		D/E
FAM61	COL1A2	7:94420409	G	A	Control3	163670	18	163723	0.000109942	124081	22	124119	0.000177249	162174	27	162231	0.000166429	449925	67	450073	0.000148892	0.000115391	0.000189083	NA	NA	NA		D/E
FAM62	TSC1	9:132912382	A	C	C1	1993	2259	4253	0.531154	2171	2076	4247	0.488816	2707	2229	4940	0.451215	6871	6564	13440	0.488575	0.480088	0.497066	0.488551	0.480101	0.497005		A
FAM62	TSC1	9:132912382	A	C	C2	2360	2052	4414	0.464884	1892	2128	4020	0.529353	3021	3197	6219	0.51407	7273	7377	14653	0.503549	0.495419	0.511679	0.503526	0.49543	0.511622		A
FAM62	TSC1	9:132912382	A	C	C7	42958	42981	85962	0.5	38017	41626	79668	0.522493	34242	34696	68963	0.50311	115217	119303	234593	0.508711	0.506686	0.510737	0.508689	0.506665	0.510712		A
FAM62	TSC1	9:132912382	A	C	F1	4906	0	4906	0	5766	1	5769	0.00017334	5139	0	5140	0	15811	1	15815	6.32431e-05	1.60118e-06	0.000352317	2.3884e-05	0	0.00023908		A
FAM62	TSC1	9:132912382	A	C	F2	3778	0	3778	0	7227	1	7231	0.000138293	4775	0	4776	0	15780	1	15785	6.33673e-05	1.60432e-06	0.000353009	2.39963e-05	0	0.000239615		A
FAM62	TSC1	9:132912382	A	C	F3	4663	0	4664	0	10389	0	10390	0	6573	2	6576	0.000304136	21625	2	21630	9.2477e-05	1.11996e-05	0.000334018	5.13368e-05	0	0.000245766		A
FAM62	TSC1	9:132912382	A	C	F4	3251	1	3253	0.000307409	11770	0	11772	0	9745	1	9746	0.000102606	24766	2	24771	8.07494e-05	9.77927e-06	0.000291664	4.03012e-05	0	0.000210392		A
FAM62	TSC1	9:132912382	A	C	F5	NA	NA	NA	NA	NA	NA	NA	NA	NA	NA	NA	NA	NA	NA	NA	NA	NA	NA	NA	NA	NA		A
FAM62	TSC1	9:132912382	A	C	F6	5246	1	5249	0.000190512	17793	0	17794	0	13709	0	13713	0	36748	1	36756	2.72116e-05	6.88938e-07	0.000151604	1.41066e-16	0	8.77925e-05		A
FAM62	TSC1	9:132912382	A	C	M1	5387	0	5388	0	3545	0	3545	0	4720	0	4720	0	13652	0	13653	0	0	0.000270171	0	0	9.90847e-05		A
FAM62	TSC1	9:132912382	A	C	M2	4117	0	4119	0	4087	0	4087	0	4427	0	4427	0	12631	0	12633	0	0	0.000292007	0	0	0.000107094		A
FAM62	TSC1	9:132912382	A	C	M3	4220	0	4221	0	3183	0	3183	0	2534	0	2536	0	9937	0	9940	0	0	0.000371158	0	0	0.000136126		A
FAM62	TSC1	9:132912382	A	C	M4	5254	1	5255	0.000190295	4364	1	4366	0.000229043	3808	1	3810	0.000262467	13426	3	13431	0.000223397	4.60722e-05	0.000652721	0.000179263	4.40916e-06	0.000536287		A
FAM62	TSC1	9:132912382	A	C	M5	NA	NA	NA	NA	NA	NA	NA	NA	NA	NA	NA	NA	NA	NA	NA	NA	NA	NA	NA	NA	NA		A
FAM62	TSC1	9:132912382	A	C	Control1	12966	0	12969	0	18976	0	18978	0	6240	0	6240	0	38182	0	38187	0	0	9.66084e-05	NA	NA	NA		A
FAM62	TSC1	9:132912382	A	C	Control2	6333	0	6335	0	6435	0	6436	0	4322	2	4326	0.000462321	17090	2	17097	0.000117014	1.41712e-05	0.00042263	NA	NA	NA		A
FAM62	TSC1	9:132912382	A	C	Control3	7396	1	7398	0.000135172	12296	0	12298	0	10846	0	10850	0	30538	1	30546	3.2745e-05	8.29032e-07	0.00018243	NA	NA	NA		A
FAM64	KANSL1	17:46171228	G	delG	C1	NA	NA	NA	NA	NA	NA	NA	NA	NA	NA	NA	NA	NA	NA	NA	NA	NA	NA	NA	NA	NA		A
FAM64	KANSL1	17:46171228	G	delG	C2	NA	NA	NA	NA	NA	NA	NA	NA	NA	NA	NA	NA	NA	NA	NA	NA	NA	NA	NA	NA	NA		A
FAM64	KANSL1	17:46171228	G	delG	C7	4958	4800	9759	0.491854	5575	5369	10946	0.490499	5290	5009	10305	0.486075	15823	15178	31010	0.489597	0.484018	0.495179	0.489554	0.48399	0.49512		A
FAM64	KANSL1	17:46171228	G	delG	F1	2002	0	2003	0	1838	0	1838	0	1435	0	1436	0	5275	0	5277	0	0	0.000699069	0	0	0.000256417		A
FAM64	KANSL1	17:46171228	G	delG	F2	3271	0	3273	0	3379	0	3380	0	2729	0	2729	0	9379	0	9382	0	0	0.000393235	0	0	0.000144224		A
FAM64	KANSL1	17:46171228	G	delG	F3	5306	0	5306	0	5161	0	5166	0	6070	0	6071	0	16537	0	16543	0	0	0.000223043	0	0	8.17994e-05		A
FAM64	KANSL1	17:46171228	G	delG	F4	5949	0	5953	0	11260	1	11267	8.87548e-05	8968	0	8970	0	26177	1	26190	3.82e-05	9.6714e-07	0.000212818	1.22389e-16	0	0.000121064		A
FAM64	KANSL1	17:46171228	G	delG	F5	5754	0	5757	0	6435	0	6435	0	6101	1	6105	0.0001638	18290	1	18297	5.46717e-05	1.38417e-06	0.000304573	1.01148e-16	0	0.000184861		A
FAM64	KANSL1	17:46171228	G	delG	F6	4265	2	4267	0.000468713	14193	0	14196	0	7331	1	7334	0.000136351	25789	3	25797	0.000116315	2.39876e-05	0.000339884	4.98517e-05	0	0.000241433		A
FAM64	KANSL1	17:46171228	G	delG	M1	3229	0	3230	0	4819	0	4821	0	3686	0	3687	0	11734	0	11738	0	0	0.000314326	0	0	0.00011528		A
FAM64	KANSL1	17:46171228	G	delG	M2	3764	0	3768	0	6366	0	6369	0	5529	0	5529	0	15659	0	15666	0	0	0.000235548	0	0	8.63857e-05		A
FAM64	KANSL1	17:46171228	G	delG	M3	3675	0	3676	0	2965	0	2968	0	4775	0	4776	0	11415	0	11420	0	0	0.000323108	0	0	0.000118501		A
FAM64	KANSL1	17:46171228	G	delG	M4	3898	0	3898	0	5927	0	5927	0	5220	1	5222	0.000191498	15045	1	15047	6.64628e-05	1.68269e-06	0.000370251	7.0067e-06	0	0.000233161		A
FAM64	KANSL1	17:46171228	G	delG	M5	7837	0	7839	0	9663	1	9667	0.000103445	10499	1	10502	9.522e-05	27999	2	28008	7.1426e-05	8.65014e-06	0.000257991	1.14117e-05	0	0.000165587		A
FAM64	KANSL1	17:46171228	G	delG	Control1	5512	0	5512	0	4758	1	4761	0.00021004	6235	0	6237	0	16505	1	16510	6.0584e-05	1.53385e-06	0.000337506	NA	NA	NA		A
FAM64	KANSL1	17:46171228	G	delG	Control2	2398	0	2400	0	4558	0	4559	0	2550	0	2552	0	9506	0	9511	0	0	0.000387983	NA	NA	NA		A
FAM64	KANSL1	17:46171228	G	delG	Control3	2011	0	2012	0	4899	1	4902	0.000203998	2487	0	2488	0	9397	1	9402	0.000106406	2.69395e-06	0.00059271	NA	NA	NA		A
FAM65	PHF6	X:134413497	T	dupT	C1	4481	4482	8964	0.5	5641	6338	11981	0.529004	142	136	278	0.489209	10264	10956	21223	0.516305	0.509556	0.52305	0.516293	0.509567	0.523014		A/D/E
FAM65	PHF6	X:134413497	T	dupT	C2	4267	3649	7917	0.460907	4835	4657	9492	0.490624	168	148	316	0.468354	9270	8454	17725	0.47698	0.469603	0.484365	0.476966	0.469617	0.484323		A/D/E
FAM65	PHF6	X:134413497	T	dupT	C7	4109	4034	8145	0.495273	3112	3037	6149	0.493901	337	336	673	0.499257	7558	7407	14967	0.494955	0.486913	0.502999	0.494941	0.486932	0.502953		A/D/E
FAM65	PHF6	X:134413497	T	dupT	F1	1390	0	1390	0	6474	1	6475	0.00015444	9102	1	9103	0.000109854	16966	2	16968	0.000117869	1.42748e-05	0.000425718	9.41411e-05	0	0.00034089		A/D/E
FAM65	PHF6	X:134413497	T	dupT	F2	6545	0	6546	0	8252	0	8252	0	233	1	234	0.0042735	15030	1	15032	6.65292e-05	1.68437e-06	0.00037062	4.43665e-05	0	0.000270739		A/D/E
FAM65	PHF6	X:134413497	T	dupT	F3	7215	0	7216	0	9001	1	9003	0.000111074	131	0	131	0	16347	1	16350	6.11696e-05	1.54868e-06	0.000340767	3.93256e-05	0	0.000247463		A/D/E
FAM65	PHF6	X:134413497	T	dupT	F4	5932	0	5933	0	9590	0	9593	0	2147	0	2147	0	17669	0	17673	0	0	0.000208755	0	0	7.65589e-05		A/D/E
FAM65	PHF6	X:134413497	T	dupT	F5	NA	NA	NA	NA	NA	NA	NA	NA	NA	NA	NA	NA	NA	NA	NA	NA	NA	NA	NA	NA	NA		A/D/E
FAM65	PHF6	X:134413497	T	dupT	F6	1868	0	1868	0	35	1	36	0.0277778	324	1	325	0.00307692	2227	2	2229	0.000897263	0.000108681	0.00323743	0.000871087	0.000122118	0.002742		A/D/E
FAM65	PHF6	X:134413497	T	dupT	M1	8595	1	8596	0.000116333	7502	0	7504	0	8639	1	8640	0.000115741	24736	2	24740	8.08473e-05	9.79113e-06	0.000292017	5.82802e-05	0	0.000227947		A/D/E
FAM65	PHF6	X:134413497	T	dupT	M2	8000	1	8002	0.000124969	8786	2	8791	0.000227505	9945	1	9947	0.000100533	26731	4	26740	0.000149617	4.07669e-05	0.000383033	0.000125541	1.5155e-05	0.000324852		A/D/E
FAM65	PHF6	X:134413497	T	dupT	M3	10927	0	10930	0	14032	1	14036	7.12454e-05	961	0	961	0	25920	1	25927	3.85788e-05	9.76729e-07	0.000214928	1.88022e-05	0	0.000150078		A/D/E
FAM65	PHF6	X:134413497	T	dupT	M4	11846	0	11847	0	13043	7	13050	0.000536398	5252	0	5252	0	30141	7	30149	0.000232188	9.33565e-05	0.000478337	0.000207382	6.90769e-05	0.000425818		A/D/E
FAM65	PHF6	X:134413497	T	dupT	M5	3612	0	3612	0	5634	0	5635	0	5639	0	5640	0	14885	0	14887	0	0	0.000247795	0	0	9.08774e-05		A/D/E
FAM65	PHF6	X:134413497	T	dupT	Control1	6884	0	6886	0	103	0	103	0	9684	1	9685	0.000103252	16671	1	16674	5.99808e-05	1.51858e-06	0.000334146	NA	NA	NA		A/D/E
FAM65	PHF6	X:134413497	T	dupT	Control2	11226	0	11232	0	12386	0	12387	0	10431	0	10432	0	34043	0	34051	0	0	0.000108354	NA	NA	NA		A/D/E
FAM65	PHF6	X:134413497	T	dupT	Control3	7000	0	7004	0	7604	0	7605	0	9887	0	9888	0	24491	0	24497	0	0	0.00015061	NA	NA	NA		A/D/E
FAM66	ABCC9	12:21818238	G	A	C1	3130	2719	5849	0.464866	5802	5985	11789	0.507677	2873	2971	5845	0.508298	11805	11675	23483	0.497232	0.490816	0.503648	0.497027	0.490629	0.503425		A
FAM66	ABCC9	12:21818238	G	A	C2	1927	2021	3949	0.511775	7231	7515	14750	0.509492	4369	4743	9114	0.520408	13527	14279	27813	0.513522	0.507628	0.519413	0.513324	0.507445	0.5192		A
FAM66	ABCC9	12:21818238	G	A	C7	995	1111	2106	0.52754	4288	4678	8967	0.521691	3005	3204	6210	0.515942	8288	8993	17283	0.520398	0.512918	0.527872	0.520203	0.512748	0.527651		A
FAM66	ABCC9	12:21818238	G	A	F1	4816	0	4816	0	6429	2	6432	0.000310945	8285	1	8287	0.000120671	19530	3	19535	0.000153586	3.16743e-05	0.000448778	1.13941e-16	0	0.000166011		A
FAM66	ABCC9	12:21818238	G	A	F2	8530	3	8534	0.000351535	8212	2	8217	0.000243398	13322	2	13324	0.000150105	30064	7	30075	0.000232782	9.35956e-05	0.000479562	1.02048e-16	0	0.000166228		A
FAM66	ABCC9	12:21818238	G	A	F3	7381	3	7384	0.000406284	8254	0	8255	0	10945	0	10946	0	26580	3	26585	0.000112854	2.32738e-05	0.000329772	1.38109e-16	0	0.000111394		A
FAM66	ABCC9	12:21818238	G	A	F4	3109	2	3111	0.00064288	10563	1	10567	9.46342e-05	12324	2	12326	0.000162259	25996	5	26004	0.0001923	6.24422e-05	0.000448707	1.45444e-16	0	0.000154997		A
FAM66	ABCC9	12:21818238	G	A	F5	230	0	230	0	709	0	709	0	344	0	344	0	1283	0	1283	0	0	0.00287107	0	0	0.00105383		A
FAM66	ABCC9	12:21818238	G	A	F6	7260	2	7262	0.000275406	9041	1	9043	0.000110583	4916	0	4916	0	21217	3	21221	0.000141376	2.91561e-05	0.000413105	9.89988e-17	0	0.000148767		A
FAM66	ABCC9	12:21818238	G	A	M1	4747	1	4749	0.000210571	4513	1	4514	0.000221533	7757	2	7760	0.000257732	17017	4	17023	0.000235004	6.40342e-05	0.000601593	1.03728e-16	0	0.000244465		A
FAM66	ABCC9	12:21818238	G	A	M2	6485	1	6486	0.000154178	6162	0	6162	0	9692	2	9695	0.000206292	22339	3	22343	0.000134276	2.76918e-05	0.000392362	9.03102e-17	0	0.000139085		A
FAM66	ABCC9	12:21818238	G	A	M3	5141	0	5141	0	6386	0	6388	0	7363	1	7364	0.000135796	18890	1	18893	5.29353e-05	1.3402e-06	0.000294901	9.55847e-17	0	0.00012096		A
FAM66	ABCC9	12:21818238	G	A	M4	7018	0	7019	0	6392	2	6394	0.000312793	5714	1	5716	0.000174948	19124	3	19129	0.000156846	3.23467e-05	0.000458302	1.17931e-16	0	0.000170743		A
FAM66	ABCC9	12:21818238	G	A	M5	6256	0	6257	0	6389	2	6391	0.00031294	7366	3	7371	0.000407	20011	5	20019	0.0002498	8.11142e-05	0.000582853	1.14919e-16	0	0.000230751		A
FAM66	ABCC9	12:21818238	G	A	Control1	NA	NA	NA	NA	7983	2	7988	0.000250376	7970	3	7974	0.000376223	15953	5	15962	0.000313322	0.000101743	0.000731037	NA	NA	NA		A
FAM66	ABCC9	12:21818238	G	A	Control2	5288	2	5290	0.000378072	3931	1	3932	0.000254323	4696	1	4697	0.000212902	13915	4	13919	0.000287377	7.83059e-05	0.000735634	NA	NA	NA		A
FAM66	ABCC9	12:21818238	G	A	Control3	1488	0	1489	0	4355	1	4356	0.000229568	3541	5	3546	0.00141004	9384	6	9391	0.000638978	0.000234528	0.00139026	NA	NA	NA		A
FAM67	GABRA2	4:46262110	G	T	C1	3583	3392	6978	0.486099	4800	4669	9472	0.492927	3407	3037	6445	0.471218	11790	11098	22895	0.484883	0.478389	0.491381	0.48477	0.478296	0.491248		A
FAM67	GABRA2	4:46262110	G	T	C2	3578	3620	7199	0.502848	3267	2841	6111	0.464899	4462	4012	8480	0.473113	11307	10473	21790	0.480854	0.474199	0.487515	0.480741	0.474106	0.48738		A
FAM67	GABRA2	4:46262110	G	T	C7	3884	3824	7710	0.495979	5679	5133	10817	0.474531	4533	4333	8869	0.488556	14096	13290	27396	0.485284	0.479349	0.491223	0.485172	0.479253	0.491094		A
FAM67	GABRA2	4:46262110	G	T	F1	4973	0	4973	0	5818	0	5818	0	6797	0	6797	0	17588	0	17588	0	0	0.000209716	0	0	7.69115e-05		A
FAM67	GABRA2	4:46262110	G	T	F2	6302	0	6302	0	7943	1	7945	0.000125865	8451	2	8456	0.000236518	22696	3	22703	0.000132164	2.72563e-05	0.000386191	8.77257e-17	0	0.000184587		A
FAM67	GABRA2	4:46262110	G	T	F3	9679	0	9681	0	10615	0	10617	0	12800	0	12800	0	33094	0	33098	0	0	0.000111461	0	0	4.08758e-05		A
FAM67	GABRA2	4:46262110	G	T	F4	6861	0	6861	0	11686	0	11686	0	8257	2	8259	0.00024216	26804	2	26806	7.46102e-05	9.03576e-06	0.000269491	1.47737e-16	0	0.000115786		A
FAM67	GABRA2	4:46262110	G	T	F5	522	0	522	0	941	1	942	0.00106157	1578	12	1590	0.00754717	3041	13	3054	0.00425671	0.00226841	0.00726811	0.00404055	0.00212118	0.00678518		A
FAM67	GABRA2	4:46262110	G	T	F6	6834	0	6836	0	10308	0	10311	0	10534	1	10536	9.49127e-05	27676	1	27683	3.61311e-05	9.14759e-07	0.000201293	1.1329e-16	0	8.80033e-05		A
FAM67	GABRA2	4:46262110	G	T	M1	5638	0	5638	0	7730	0	7731	0	6055	0	6056	0	19423	0	19425	0	0	0.000189905	0	0	6.96455e-05		A
FAM67	GABRA2	4:46262110	G	T	M2	6450	0	6452	0	9518	0	9519	0	8224	0	8226	0	24192	0	24197	0	0	0.000152472	0	0	5.59166e-05		A
FAM67	GABRA2	4:46262110	G	T	M3	6628	0	6629	0	7403	0	7404	0	4198	0	4199	0	18229	0	18232	0	0	0.000202343	0	0	7.42071e-05		A
FAM67	GABRA2	4:46262110	G	T	M4	5032	1	5034	0.000198649	5377	1	5378	0.000185943	5490	1	5493	0.00018205	15899	3	15905	0.000188656	3.8907e-05	0.000551232	1.42688e-16	0	0.000308553		A
FAM67	GABRA2	4:46262110	G	T	M5	3264	0	3265	0	739	0	739	0	1684	0	1684	0	5687	0	5688	0	0	0.000648441	0	0	0.000237843		A
FAM67	GABRA2	4:46262110	G	T	Control1	4927	0	4928	0	6035	2	6037	0.00033129	6879	3	6882	0.00043592	17841	5	17847	0.000280175	9.09781e-05	0.000653712	NA	NA	NA		A
FAM67	GABRA2	4:46262110	G	T	Control2	4836	0	4837	0	5982	2	5985	0.000334169	4270	0	4273	0	15088	2	15095	0.000132538	1.60514e-05	0.00047869	NA	NA	NA		A
FAM67	GABRA2	4:46262110	G	T	Control3	2400	1	2403	0.000416146	1456	0	1456	0	4423	0	4423	0	8279	1	8282	0.000120773	3.0577e-06	0.000672718	NA	NA	NA		A

## Sheet: Supplementary Data 2 - Notes
Supplementary Data 2 - Notes
The columns of Supplementary Data 2 are as follows:
Column name	Description
REF count	Number of reads supporting the reference allele at the given genomic location
ALT count	Number of reads supporting the mutant allele at the given genomic location
Depth	Total number of reads at the given genomic location
VAF	Variant Allele Frequency
95% CI_LO	95% Binomial Confidence Interval - Lower bound (of binomial distribution)
95% CI_UP	95% Binomial Confidence Interval - Upper bound (of binomial distribution)
Corrected VAF	Variant Allele Frequency correction, taking into account the background ALT reads in the unrelated control samples (see Methods; code available at github.com/sjbush/pregcare)
NA	Not applicable (missing or failed sample)
	The Deep-NGS assay was not well suited to assess the two large indel DNMs, i.e. one of the two FAM12 DNMs (FAM12b, a 35bp deletion in MECP2) and the FAM54 DNM (a 44bp duplication). These were assessed separately via allele-specific PCR (see Methods and Supplementary Note 2).
The sample types (column F) are as follows:
Sample type	Description
C1	proband (child) - left buccal swab
C2	proband (child) - right buccal swab
C7	proband (child) gDNA from original testing - usually blood, but sometimes sourced from a chorionic villus biopsy or amniocentesis
F1	father - left buccal swab
F2	father - right buccal swab
F3	father - blood
F4	father - saliva
F5	father - urine
F6	father - sperm
M1	mother - left buccal swab
M2	mother - right buccal swab
M3	mother - blood
M4	mother - saliva
M5	mother - urine
Control1	unrelated control - blood 1
Control2	unrelated control - blood 2
Control3	unrelated control - blood 3
The DNM categories (column AC, see also Figure 1) are as follows:
DNM category	Description
A	paternal one-off DNM
B	paternal confined gonadal mosaicism
C	paternal mixed mosaicism
D	maternal one-off DNM
E	maternal confined gonadal mosaicism
F	maternal mixed mosaicism
G	post-zygotic mosaicism in the proband

## Sheet: Supplementary Data 3A
Supplementary Data 3A. Overview of the phasing strategy for each of the individual PREGCARE families
In total, the PREGCARE dataset comprises 61 DNMs and for 50 DNMs, with long-read sequencing performed to attempt haplotyping of the DNM (see Supplementary Note 3).
Summary counts of the number of DNMs haplotyped by each method of phasing (medaka, pileup, manual) are given below the table.
Family ID	Region sequenced by long-read sequencing (without primer sequences)	Length of region sequenced (bp)	De novo mutation (chr:position)	Type of de novo mutation	Reference allele (for DNM)	Variant (ALT) allele (for DNM)	Method of phasing (order of priority: medaka, pileup, manual), else 'unresolved'	Reason for Medaka's inability to phase (see Supplementary Note 3 for additional detail)	Read counts for DNM SNV or number of reads precisely supporting DNM indel (for SNVs, counts are given as A|C|G|T), obtained from pileup	Total depth of coverage for DNM	dbSNP ID (for DNM)	How many SNPs are in the same phase set as the DNM, not including the DNM itself?	SNPs in the proband's phase set, not including the DNM (listed in order of distance from DNM and reported as dbSNP IDs if available, else 'chr:pos')	How many informative SNPs (= different between parents) are in the same phase set, not including the DNM?	Informative SNPs (= different between parents) in the proband's phase set, not including the DNM (listed in order of distance from DNM and reported as dbSNP IDs if available, else 'chr:pos')	Total depth of coverage for informative SNPs in the proband's phase set, listed in the order previously stated	Bases at informative SNP positions that phase with the DNM (in the proband, listed in the order previously stated)	Maternal genotypes at informative SNPs, listed in order previously stated	Paternal genotypes at informative SNPs, listed in order previously stated	Proband genotypes at informative SNPs, listed in order previously stated	Phasing (resolved using data in previous columns, except where 'method of phasing' is 'manual')	Min. distance of an informative SNP from DNM (bp)	Max. distance of an informative SNP from DNM (bp)	Notes
FAM01	Long-read sequencing was not required - maternal mosaicism detected using Deep-NGS
FAM02	1:155899501-155904538	5038	1:155904496	SNV	A	C	manual	DNM called in the child but no in-phase SNPs identified	2104|2384|6|29	4523	rs869025194	0	.	0	.	.	.	.	.	.	paternal	.	.	DNM manually phased using an informative indel, not a SNP - see description in Supplementary Data 3B
FAM03	10:75008288-75035718	27431	10:75022006-75022007	Indel	CG	G	unresolved	DNM not called in the child	37	160	.	0	.	0	.	.	.	.	.	.	unresolved	.	.	.
FAM04	16:2075652-2086292	10641	16:2086242	SNV	A	G	medaka	NA	204|2|299|0	505	rs45478894	1	rs77735328	1	rs77735328	864	T	AA	TT	TA	paternal	7375	7375	.
FAM05	8:60860969-60872945	11977	8:60861022	SNV	A	G	pileup	DNM called in the child but no in-phase SNPs identified	1382|0|1154|1	2537	.	1	rs7844586	1	rs7844586	1584	T	CC	TT	TC	paternal	8723	8723	.
FAM06	12:49180285-49185134	4850	12:49185098	SNV	T	C	pileup	DNM not called in the child	0|979|0|299	1278	.	1	rs7953169	1	rs7953169	524	A	GG	AA	GA	paternal	709	709	.
FAM07	7:94406826-94417881	11056	7:94417833	SNV	T	G	pileup	DNM not called in the child	12|27|2986|2253	5278	.	1	rs143085811	1	rs143085811	4174	T	TC	TT	TC	paternal	3542	3542	.
FAM08	8:60809141-60824061	14921	8:60824021	SNV	G	C	pileup	DNM called in the child and in-phase SNPs identified, but none are informative	0|294|274|3	571	.	1	rs6997222	1	rs6997222	286	G	AA	GG	AG	paternal	5759	5759	.
FAM09	10:75028987-75045504	16518	10:75029029-75029030	Indel	CTCT	CT	pileup	DNM not called in the child	130	498	rs199470477	1	rs148242818	1	rs148242818	233	A	AA	AT	AT	maternal	7579	7579	.
FAM10	3:12604137-12615188	11052	3:12604200	SNV	G	A	medaka	NA	227|1|285|0	513	rs80338796	1	rs186169149	1	rs186169149	570	G	TT	TG	TG	paternal	6695	6695	.
FAM11	5:177208324-177210332	2009	5:177210200-177210201	Indel	CAA	C	manual	DNM called in the child but no in-phase SNPs identified	518	1921	.	0	.	0	.	.	.	.	.	.	paternal	.	.	DNM manually phased using two SNPs - see description in Supplementary Data 3B
FAM12a	Long-read sequencing was not required - an informative SNP on the Illumina (Deep-NGS) fragment resolved the parent of origin
FAM12b	X:154020568-154030776	10209	X:154030621-154030664	Indel	GGGGGCTGGTGGGGTCCTCGGAGCTCTCGGGCTCAGGTGGAGGT	G	unresolved	DNM not called in the child	7	405	.	0	.	0	.	.	.	.	.	.	unresolved	.	.	.
FAM13	8:23007373-23021022	13650	8:23007627	SNV	G	A	medaka	NA	393|1|360|0	754	rs1554504663	7	rs73672962, rs2241259, rs2466183, rs6991751, rs6557607, rs75943787, rs2241261	7	rs73672962, rs2241259, rs2466183, rs6991751, rs6557607, rs75943787, rs2241261	1234, 1223, 1173, 1178, 1245, 1251, 1298	G, G, G, A, A, C, C	CG, CG, GT, GA, GA, CC, CC	CC, CC, TT, GG, GG, CT, TT	CG, CG, GT, GA, GA, CT, CT	maternal	2650	11599	.
FAM15	3:12598384-12612100	13717	3:12604194	SNV	G	C	medaka	NA	1|788|1004|5	1798	rs397516827	4	rs1963609, rs2055311, rs2246390, rs4684864	1	rs1963609	851	T	TC	TT	TC	paternal	2545	5830	.
FAM16	16:2079336-2088791	9456	16:2088585	Indel	TG	TTG	manual	DNM not called in the child	588	663	.	1	rs56201105	1	rs56201105	1103	G	GA	GG	GA	paternal	7810	7810	Duplication difficult to align but visible on IGV - see description in Supplementary Data 3B
FAM17	12:112468406-112477913	9508	12:112477651	SNV	T	C	medaka	NA	0|350|0|448	798	rs121918463	1	rs11066320	1	rs11066320	1014	G	GG	AA	AG	maternal	9040	9040	Although maternal mosaicism had already been detected using Deep-NGS, long-read sequencing was also performed for this family
FAM18	8:60821806-60835740	13935	8:60821831	SNV	T	G	unresolved	DNM not called in the child	9|1|341|232	583	.	0	.	0	.	.	.	.	.	.	unresolved	.	.	.
FAM19	10:110952002-110972445	20444	10:110964362	SNV	A	G	medaka	NA	250|1|158|0	409	rs267607048	8	rs7901832, rs12762659, rs11195389, rs72819752, rs10885068, rs4597005, rs4335469, rs56302131	8	rs7901832, rs12762659, rs11195389, rs72819752, rs10885068, rs4597005, rs4335469, rs56302131	384, 157, 387, 386, 387, 388, 388, 392	C, A, G, G, A, T, T, T	TC, GG, GC, GT, GA, CT, CT, TC	CC, GA, GG, GG, AA, TT, TT, TT	TC, GA, GC, GT, GA, CT, CT, TC	paternal	5305	11994	.
FAM20	17:59669504-59693837	24334	17:59681719	SNV	T	C	pileup	DNM not called in the child	6|288|6|462	762	.	1	rs72839092	1	rs72839092	413	T	CC	CT	CT	paternal	6211	6211	.
FAM21	Long-read sequencing was not required - an informative SNP on the Illumina (Deep-NGS) fragment resolved the parent of origin
FAM22	7:140790599-140811946	21,348	7:140801502	SNV	T	C	unresolved	DNM called in the child and in-phase SNPs identified, but none are informative	1|80|1|152	234	rs180177035	0	.	0	.	.	.	.	.	.	unresolved	.	.	.
FAM24	X:64191988-64194384	2397	X:64192230	SNV	G	A	pileup	DNM called in the child and in-phase SNPs identified, but none are informative	1033|11|727|4	1775	rs137852216	1	rs55766931	1	rs55766931	1538	C	CT	C	CT	paternal	1417	1417	.
FAM25	5:140101197-140120581	19385	5:140114651	SNV	T	G	medaka	NA	9|24|3274|3532	6839	.	1	rs115129982	1	rs115129982	8197	A	GA	GG	GA	maternal	3665	3665	.
FAM26	Long-read sequencing was not required - the DNM was X-linked and in a male proband, therefore assumed to be maternal in origin
FAM27	X:154020347-154045086	24740	X:154031022	Indel	GC	C	pileup	DNM not called in the child	1249	2708	.	1	rs2734647	1	rs2734647	46	C	TT	C	TC	paternal	4292	4292	Although confined paternal gonadal mosaicism had been detected, given the low VAF observed in sperm, long-read sequencing was also performed for this family
FAM28	11:118461732-118484439	22708	11:118473689	SNV	C	T	unresolved	DNM called in the child but no in-phase SNPs identified	3|461|0|392	856	.	0	.	0	.	.	.	.	.	.	unresolved	.	.	.
FAM30	2:47149339-47173523	24185	2:47161756	SNV	C	A	medaka	NA	724|778|3|1	1506	.	5	rs187405330, rs987854786, rs34990437, rs931211314, 2:47149930	5	rs187405330, rs987854786, rs34990437, rs931211314, 2:47149930	693, 1027, 693, 699, 1031	C, C, G, A, A	TT, AA, AA, TT, CC	TC, AC, GG, TA, CA	TC, AC, GA, TA, CA	paternal	1698	11826	.
FAM31	6:33430760-33437827	7068	6:33437774-33437780	Indel	CATGCTG	C	pileup	DNM not called in the child	51	191	.	1	rs453590	1	rs453590	120	C	TT	CT	CT	paternal	2124	2124	.
FAM32	3:189877719-189904196	26478	3:189890806	SNV	G	T	medaka	NA	3|6|566|451	1026	.	9	rs6790068, rs1554132, rs12107036, rs7613791, rs7633861, rs1971390, rs2889923, 3:189878816, 3:189878797	7	rs6790068, rs1554132, rs12107036, rs7613791, rs7633861, rs1971390, rs2889923	1005, 993, 993, 1001, 1027, 1027, 1029	G, C, A, C, G, C, T	AG, GC, GG, TC, AA, CA, CC	GG, CC, AG, CC, AG, CC, TC	AG, GC, AG, TC, AG, CA, TC	paternal	969	12009	.
FAM33	Long-read sequencing was not required - the DNM was a post-zygotic mutation, so it was not necessary to determine parent-of-origin
FAM34	20:63394352-63420089	25738	20:63407094-63407101	Indel	GGTGGCTC	G	pileup	DNM not called in the child	378	1475	.	1	rs1801471	1	rs1801471	888	A	TT	AT	AT	paternal	68	68	Although paternal mosaicism had been detected, long-read sequencing was also performed for this family
FAM35	2:199335590-199363185	27596	2:199349042	Indel	GG	G	pileup	DNM not called in the child	26	107	.	1	rs748616466	1	rs748616466	48	C	TT	TC	TC	paternal	9508	9508	.
FAM36	3:58065914-58091754	25841	3:58078789	SNV	C	G	unresolved	DNM called in the child and in-phase SNPs identified, but none meet QC requirements	0|143|103|0	246	rs549350178	0	.	0	.	.	.	.	.	.	unresolved	.	.	.
FAM38	1:27548816-27556791	7976	1:27548981	Indel	GG	G	manual + allele-specific PCR	DNM not called in the child	429	1370	.	0	.	0	.	.	.	.	.	.	maternal	.	.	Given the homopolymeric context of the DNM, long-read sequencing traces were poorly suited for phasing. A custom allele-specific assay was designed instead - see description in Supplementary Table S3B
FAM39	2:199335591-199360879	25289	2:199348709	SNV	G	A	medaka	NA	2507|0|3238|2	5747	rs1057521083	10	rs10153805, rs7597624, rs1838859, rs574109039, rs10177011, rs7557738, rs7574192, rs372548085, rs12614117, rs13392193	9	rs10153805, rs7597624, rs1838859, rs10177011, rs7557738, rs7574192, rs372548085, rs12614117, rs13392193	2735, 2717, 4096, 2714, 4040, 2712, 2711, 2713, 2720	G, T, C, T, T, T, T, G, G	AA, CC, TT, CC, CC, CC, CC, AA, AA	AG, TT, CC, CT, TT, CT, CT, AG, AG	AG, TC, CT, CT, CT, CT, CT, AG, AG	paternal	372	11819	.
FAM41	18:44938302-44966343	28042	18:44951942	SNV	G	A	medaka	NA	603|0|737|0	1340	rs267607042	11	rs10853528, rs4890493, rs4890492, rs11082413, rs57039145, rs41468146, rs622284, rs584432, rs623577, rs681240, rs681202	5	rs4890493, rs11082413, rs622284, rs623577, rs681202	271, 271, 276, 281, 281	G, A, C, G, A	AG, GA, CT, GC, AT	GG, AA, CC, GG, AA	AG, GA, CT, GC, AT	paternal	5579	12207	.
FAM42	Long-read sequencing was not required - an informative SNP on the Illumina (Deep-NGS) fragment resolved the parent of origin
FAM43	8:60731920-60753948	22029	8:60741901	SNV	C	T	medaka	NA	0|59|2|73	134	rs794727293	2	rs17292465, rs116913993	1	rs17292465	186	A	AT	AA	AT	paternal	5687	5768	.
FAM44	12:47972659-47988521	15863	12:47975568	SNV	C	G	pileup	DNM called in the child but no in-phase SNPs identified	1|717|681|2	1401	rs1555164786	1	rs1635560	1	rs1635560	630	G	GA	GG	GA	paternal	1522	1522	.
FAM45	14:101987296-102015889	28594	14:102002949	SNV	C	T	medaka	NA	2|169|4|219	394	.	2	rs1037592839, rs17540832	1	rs17540832	555	A	CA	CC	CA	maternal	11601	12916	.
FAM46	10:110602884-110614405	11522	10:110602966	SNV	C	G	medaka	NA	1|101|98|0	200	.	2	rs59832745, rs57531779	2	rs59832745, rs57531779	254, 252	A, C	GG, TT	AA, TC	AG, TC	paternal	5781	7746	.
FAM47	22:23816037-23837987	21951	22:23825396	SNV	C	T	unresolved	DNM not called in the child	0|103|0|55	158	.	0	.	0	.	.	.	.	.	.	unresolved	.	.	.
FAM48	7:140786678-140814029	27352	7:140801536	SNV	C	G	medaka	NA	0|68|79|0	147	rs180177034	6	7:140801640, rs58861259, rs28615534, rs146486777, rs58554741, rs58233801	4	rs58861259, rs146486777, rs58554741, rs58233801	146, 150, 152, 153	C, G, C, C	CT, AA, CT, CT	CC, AG, CC, CC	CT, AG, CT, CT	paternal	104	11774	.
FAM49	Long-read sequencing was not required - mixed paternal mosaicism detected using Deep-NGS
FAM50	Long-read sequencing was not required - maternal mosaicism detected using Deep-NGS
FAM51	2:166027943-166047376	19434	2:166037862	SNV	C	T	medaka	NA	1|204|1|228	434	rs121918786	56	rs2020318, rs6719077, rs6732655, rs10185007, rs6732789, rs4667863, rs6719462, rs6761757, rs6719899, rs7601520, rs1019724, rs1019723, rs2298771, rs2126152, rs490317, rs6432859, rs114707732, rs1019722, rs1962843, rs1962842, rs1531380, rs1531379, rs1531378, rs6432860, rs13418651, rs6731591, rs17792698, rs7583749, rs7571204, rs6432858, rs10167228, rs7606888, rs7606573, rs7574618, rs5006656, rs4667862…	15	rs2020318, rs6732655, rs10185007, rs6732789, rs4667863, rs6719462, rs6761757, rs6719899, rs7601520, rs1019724, rs1019723, rs2298771, rs2126152, rs490317, rs6432859	155, 371, 150, 371, 150, 370, 370, 370, 149, 369, 369, 148, 369, 368, 368	T, A, G, A, T, T, C, T, G, T, A, C, T, T, T	CC, TT, AA, CC, GG, CC, TT, CC, AA, CC, GG, TT, GG, CC, GG	TC, AT, GA, AC, TG, TC, CT, TC, GA, TC, AA, CT, TG, CT, TG	TC, AT, GA, AC, TG, TC, CT, TC, GA, TC, AG, CT, TG, CT, TG	paternal	142	9813	.
FAM53	17:50180521-50202639	22119	17:50188538	SNV	C	T	pileup	DNM called in the child but no in-phase SNPs identified	0|1002|0|741	1743	.	1	rs2249492	1	rs2249492	1136	T	CT	CC	CT	maternal	2878	2878	.
FAM54	Long-read sequencing was not required - the DNM was in a maternally imprinted gene, therefore assumed to be paternal in origin
FAM55	9:127667075-127694377	27303	9:127680243	SNV	G	A	medaka	NA	199|0|346|1	546	.	24	rs79735301, rs17849184, rs12554049, rs150224446, rs117554200, rs3780658, rs4836574, rs60489574, rs4837175, rs57559410, rs73601671, rs116935017, rs147343120, rs76782343, rs7021441, rs76431389, rs3780660, rs146892466, rs79076703, rs17849183, rs118104753, rs1043433, rs2241168, rs2241167	23	rs79735301, rs17849184, rs12554049, rs150224446, rs117554200, rs3780658, rs4836574, rs60489574, rs4837175, rs57559410, rs73601671, rs116935017, rs147343120, rs76782343, rs7021441, rs76431389, rs3780660, rs146892466, rs17849183, rs118104753, rs1043433, rs2241168, rs2241167	247, 247, 437, 245, 427, 423, 233, 233, 227, 224, 420, 220, 416, 207, 206, 206, 382, 380, 211, 386, 392, 222, 221	T, G, C, T, T, G, G, G, A, C, C, G, C, G, T, C, A, G, T, A, C, A, A	GG, CC, TT, GG, CC, AA, AA, AA, CC, TT, TT, AA, TT, CC, CC, TT, GG, AA, CC, TT, TT, TT, GG	GT, CG, CC, GT, CT, AG, AG, AG, CA, TC, TC, AG, TC, CG, CT, TC, GA, AG, CT, TA, TC, TA, AA	GT, CG, CT, GT, CT, AG, AG, AG, CA, TC, TC, AG, TC, CG, CT, TC, GA, AG, CT, TA, TC, TA, AG	paternal	180	12406	.
FAM56	2:108740079-108764003	23925	2:108751993	SNV	C	T	medaka	NA	1|228|2|323	554	rs121434502	26	rs866114, rs144029181, rs826522, rs2433792, rs826521, rs1724198, rs1724197, rs866115, rs826557, rs3108313, rs10432620, rs826558, rs826559, rs826561, rs826549, rs71421346, rs826547, rs826562, rs826563, rs2059725, rs826564, rs826546, rs826545, rs12473546, rs826565, rs4012071	26	rs866114, rs144029181, rs826522, rs2433792, rs826521, rs1724198, rs1724197, rs866115, rs826557, rs3108313, rs10432620, rs826558, rs826559, rs826561, rs826549, rs71421346, rs826547, rs826562, rs826563, rs2059725, rs826564, rs826546, rs826545, rs12473546, rs826565, rs4012071	455, 370, 451, 367, 432, 361, 363, 357, 354, 413, 412, 352, 352, 352, 332, 335, 337, 356, 352, 354, 354, 360, 362, 362, 360, 362	A, G, A, A, T, A, G, G, C, A, G, C, A, C, G, A, T, C, T, G, A, T, T, G, C, T	TA, AG, GA, GA, GT, TA, CG, AG, GC, TA, GG, TC, GA, TC, AG, GA, AT, TC, CT, GA, CA, GT, GT, GG, TC, AT	TT, AA, GG, GG, GG, TT, CC, AA, GG, TT, TT, TT, GG, TT, AA, GG, AA, TT, CC, AA, CC, GG, GG, CC, TT, AA	TA, AG, GA, GA, GT, TA, CG, AG, GC, TA, GT, TC, GA, TC, AG, GA, AT, TC, CT, GA, CA, GT, GT, GC, TC, AT	maternal	324	10798	.
FAM57	4:1212998-1226691	13694	4:1213028	SNV	G	A	medaka	NA	297|0|311|1	609	rs869320802	1	rs567855962	1	rs567855962	263	C	CT	CC	CT	paternal	7792	7792	.
FAM58	Long-read sequencing was not required - mixed paternal mosaicism detected using Deep-NGS
FAM59	20:51778141-51803730	25590	20:51791519	Indel	CC	C	unresolved	DNM not called in the child	332	1122	.	0	.	0	.	.	.	.	.	.	unresolved	.	.	.
FAM60	Long-read sequencing was not required - maternal mosaicism detected using Deep-NGS
FAM61	7:94409396-94427662	18267	7:94420409	SNV	G	A	medaka	NA	487|1|488|11	987	rs72658168	14	rs10487255, rs42527, rs42530, rs42531, rs7781954, rs2521205, rs10487254, rs13239495, rs13240759, rs2301643, rs412777, rs42523, rs42521, rs34026686	14	rs10487255, rs42527, rs42530, rs42531, rs7781954, rs2521205, rs10487254, rs13239495, rs13240759, rs2301643, rs412777, rs42523, rs42521, rs34026686	1479, 1458, 121, 121, 1437, 1431, 1422, 1408, 127, 1390, 1391, 1404, 1407, 1413	G, T, G, A, C, G, C, T, T, G, C, C, C, G	GG, CT, AG, GA, CC, GT, CC, TT, TT, GG, AC, TC, GC, GG	AA, CC, AA, GG, TT, TT, AA, CC, CC, AA, AA, TT, GG, AA	GA, CT, AG, GA, CT, GT, CA, TC, TC, GA, AC, TC, GC, GA	maternal	1176	9434	.
FAM62	9:132901821-132920188	18368	9:132912382	SNV	A	C	pileup	DNM not called in the child	2661|2942|12|18	5633	.	1	rs2106346	1	rs2106346	1746	A	CC	AC	AC	paternal	3600	3600	.
FAM64	17:46162759-46179052	16294	17:46171228	Indel	GT	T	pileup	DNM not called in the child	2158	7427	.	1	rs9911018	1	rs9911018	4064	T	CC	CT	CT	paternal	1245	1245	.
FAM65	X:134405958-134422447	16490	X:134413497	Indel	TA	TTA	unresolved	DNM not called in the child	3738	4637	.	0	.	0	.	.	.	.	.	.	unresolved	.	.	.
FAM66	12:21809496-21826632	17137	12:21818238	SNV	G	A	medaka	NA	3263|13|3177|7	6460	.	8	rs7309274, rs2638441, rs2726120, rs35341864, rs829074, rs56178300, rs2161062, rs1873638	8	rs7309274, rs2638441, rs2726120, rs35341864, rs829074, rs56178300, rs2161062, rs1873638	2971, 5057, 3009, 4961, 3045, 3049, 3075, 3175	C, T, C, G, C, T, G, G	TT, CC, GG, GA, TT, GG, AA, AA	TC, CT, GC, GG, CC, TT, GG, GG	TC, CT, GC, GA, TC, GT, AG, AG	paternal	1133	7761	.
FAM67	4:46251998-46276966	24969	4:46262110	SNV	G	T	manual	DNM called in the child and in-phase SNPs identified, but none are informative	4|14|1938|1374	3330	rs1577800481	12	rs10938435, rs526805, rs548583, rs554112, rs532780, rs505474, rs507788, rs531926, rs534459, rs693547, rs3113346, rs481311	0	.	.	.	.	.	.	paternal	263	9745	DNM manually phased using two SNPs - see description in Supplementary Data 3B
			Total counts for long-read sequencing data
				Total			Total	SNVs	Indels
			No. of SNVs	37	No. DNMs phased by Medaka		21	21	0
			No. of indels	13	No. DNMs phased by pileup		15	9	6
				50	No. DNMs phased manually		5	2	3
					No. DNMs not phased		9	5	4
							50	37	13
			Reasons for Medaka's inability to phase the DNM
							Total	SNVs	Indels
		DNM not called in the child					18	6	12
		DNM called in the child but no in-phase SNPs identified					6	5	1
		DNM called in the child and in-phase SNPs identified, but none are informative					4	4	0
		DNM called in the child and in-phase SNPs identified, but none meet QC requirements					1	1	0
							29	16	13

## Sheet: Supplementary Data 3B
Supplementary Data 3B. Description of the informative SNP and read count tables supporting the phasing of DNMs and parent-of-origin determination for individual PREGCARE families
The majority of the following count tables were produced by the pileup-based haplotyping script, available at github.com/sjbush/pregcare. We can see that families for which phasing was resolved with Medaka can be independently resolved by this approach: the predicted phasing is the same in all cases.
There are five families for which phasing was required to be manually resolved by inspecting pileups with IGV.
For FAM02, the reads were phased using an informative indel, rs140077956 (GA/G). This was not detected by the pileup-based haplotyping script as its functionality was restricted to SNPs.
For FAM16, the DNM was a duplication in a homopolymeric region. The pileup was manually inspected using IGV as the region was technically challenging to align.
For FAM11, FAM38 and FAM67, phasing could not be resolved programmatically because no single phasing SNP - heterozygous in the child and only one parent - could be established programmatically. The Medaka- and pileup-parsing scripts did, however, report SNPs heterozygous in all three members of the trio, for manual review:
For FAM11, the heterozygous SNPs were rs1363405 (C/T), rs3733874 (G/A), and rs3733875 (G/T). Ultimately, the DNM was manually used phased using rs1363405 and rs3733874, described below.
For FAM38, the heterozygous SNPs were rs113173951 (G/A) and rs2076457 (C/A). Given the homopolymeric context, long-read sequencing with ONT MiniON was poorly suited for phasing the DNM. Ultimately, the DNM was phased using rs2076457 to design a custom allele-specific assay, described below.
For FAM67, the heterozygous SNPs were rs10938435 (T/A), rs526805 (C/A), rs548583 (A/G), rs554112 (A/C), rs532780 (C/T), rs505474 (T/C), rs507788 (C/T), rs531926 (C/T), rs534459 (A/G), rs693547 (A/T), rs3113346 (T/G), and rs481311 (A/T). Ultimately, the DNM was manually phased using rs526805, as described below. This was in conjunction with rs141330147, an A/G SNP found to only be heterozygous in …
Note on indel coordinates:
The script used to generate the following tables parses mpileup format to associate read IDs with the bases they call. To do this, it needs to be provided a list of DNM positions to search for (detailed at github.com/sjbush/pregcare). With indels, these read IDs are only accessible to the parser at the base immediately before the location of the indel; this is a pileup formatting requirement (des…
Consequently, the location of each indel in the following tables is the location where the script had to look. There may therefore be small discrepancies between this table and Table S3A.
FAM02
phasing of this family was manually resolved
the DNM occurs at 1:155904496 and is A/C
there is a candidate phasing indel 1796 bases from the DNM. it is rs140077956, a GA/G
genotype of mother: GA/GA
genotype of father: GA/G
genotype of child: GA/G
the number of reads that make biallelic calls, i.e. REF or ALT, at both loci ('DNM' and 'phasingDEL') are as follows:
	DNM REF (A)	DNM ALT (C)
phasingDEL REF (GA)	4202	690
phasingDEL ALT (G)	390	3690
two-sided Fisher's exact test. Odds ratio = 57.54463, p = 0
predicted phasing: paternal
FAM04
the DNM occurs at 16:2086242 and is A/G
there are 299 reads which call the DNM ALT and 204 reads which call the DNM REF
there is a candidate phasing SNP 7375 bases from the DNM. it is rs77735328, a T/A
in the mother, this position has ACGT counts of 472|4|4|484. The ALT base, A, has a MAF of 48.96%
in the father, this position has ACGT counts of 0|1|0|149. The ALT base, A, has a MAF of 0.00%
genotype of mother: TA
genotype of father: TT
in the child, this position has ACGT counts of 368|3|0|373. The ALT base, A, has a MAF of 49.46%
genotype of child : TA
of the 299 reads which call the DNM ALT, 229 (76.59%) also make a call at the informative (= can phase with it) locus
the number of reads that make biallelic calls, i.e. REF or ALT, at both loci ('DNM' and 'phasingSNP') are as follows:
	phasingSNP REF (T)	phasingSNP ALT (A)
DNM REF (A)	39	108
DNM ALT (G)	164	65
of the 229 reads that call the DNM ALT (i.e. G), 71.62% also call the phasingSNP REF and 28.38% also call the phasingSNP ALT
of the 147 reads that call the DNM REF (i.e. A), 26.53% also call the phasingSNP REF and 73.47% also call the phasingSNP ALT
two-sided Fisher's exact test. Odds ratio = 0.1439981, p = 5.854293e-18
predicted phasing: paternal
FAM05
the DNM occurs at 8:60861022 and is A/G
there are 1154 reads which call the DNM ALT and 1382 reads which call the DNM REF
there is a candidate phasing SNP 8723 bases from the DNM. it is rs7844586, a T/A,C,G
in the mother, this position has ACGT counts of 1|1122|1|2. The ALT base, C, has a MAF of 99.64%
in the father, this position has ACGT counts of 6|6|1|1968. The ALT base, A, has a MAF of 0.30%
genotype of mother: CC
genotype of father: TT
in the child, this position has ACGT counts of 7|1023|0|1117. The ALT base, C, has a MAF of 47.65%
genotype of child : TC
of the 1154 reads which call the DNM ALT, 730 (63.26%) also make a call at the informative (= can phase with it) locus
the number of reads that make biallelic calls, i.e. REF or ALT, at both loci ('DNM' and 'phasingSNP') are as follows:
	phasingSNP REF (T)	phasingSNP ALT (C)
DNM REF (A)	262	592
DNM ALT (G)	550	180
of the 730 reads that call the DNM ALT (i.e. G), 75.34% also call the phasingSNP REF and 24.66% also call the phasingSNP ALT
of the 854 reads that call the DNM REF (i.e. A), 30.68% also call the phasingSNP REF and 69.32% also call the phasingSNP ALT
two-sided Fisher's exact test. Odds ratio = 0.1450443, p = 1.324995e-72
predicted phasing: paternal
FAM06
the DNM occurs at 12:49185098 and is T/C
there are 979 reads which call the DNM ALT and 299 reads which call the DNM REF
there is a candidate phasing SNP 709 bases from the DNM. it is rs7953169, a G/A
in the mother, this position has ACGT counts of 6|1|2363|1. The ALT base, A, has a MAF of 0.25%
in the father, this position has ACGT counts of 2448|2|404|5. The ALT base, A, has a MAF of 85.62%
genotype of mother: GG
genotype of father: AA
in the child, this position has ACGT counts of 631|0|808|0. The ALT base, A, has a MAF of 43.85%
genotype of child : GA
of the 979 reads which call the DNM ALT, 411 (41.98%) also make a call at the informative (= can phase with it) locus
the number of reads that make biallelic calls, i.e. REF or ALT, at both loci ('DNM' and 'phasingSNP') are as follows:
	phasingSNP REF (G)	phasingSNP ALT (A)
DNM REF (T)	107	6
DNM ALT (C)	80	331
of the 411 reads that call the DNM ALT (i.e. C), 19.46% also call the phasingSNP REF and 80.54% also call the phasingSNP ALT
of the 113 reads that call the DNM REF (i.e. T), 94.69% also call the phasingSNP REF and 5.31% also call the phasingSNP ALT
two-sided Fisher's exact test. Odds ratio = 73.01971, p = 1.731589e-51
predicted phasing: paternal
FAM07
the DNM occurs at 7:94417833 and is T/G
there are 2986 reads which call the DNM ALT and 2253 reads which call the DNM REF
there is a candidate phasing SNP 3542 bases from the DNM. it is rs143085811, a T/A,C
in the mother, this position has ACGT counts of 3|2793|8|3241. The ALT base, C, has a MAF of 46.20%
in the father, this position has ACGT counts of 6|45|2|7530. The ALT base, C, has a MAF of 0.59%
genotype of mother: TC
genotype of father: TT
in the child, this position has ACGT counts of 3|3074|9|3485. The ALT base, C, has a MAF of 46.78%
genotype of child : TC
of the 2986 reads which call the DNM ALT, 2386 (79.91%) also make a call at the informative (= can phase with it) locus
the number of reads that make biallelic calls, i.e. REF or ALT, at both loci ('DNM' and 'phasingSNP') are as follows:
	phasingSNP REF (T)	phasingSNP ALT (C)
DNM REF (T)	136	1652
DNM ALT (G)	2263	123
of the 2386 reads that call the DNM ALT (i.e. G), 94.84% also call the phasingSNP REF and 5.16% also call the phasingSNP ALT
of the 1788 reads that call the DNM REF (i.e. T), 7.61% also call the phasingSNP REF and 92.39% also call the phasingSNP ALT
two-sided Fisher's exact test. Odds ratio = 0.004496844, p = 0
predicted phasing: paternal
FAM08
the DNM occurs at 8:60824021 and is G/C
there are 294 reads which call the DNM ALT and 274 reads which call the DNM REF
there is a candidate phasing SNP 5759 bases from the DNM. it is rs6997222, a A/C,G,T
in the mother, this position has ACGT counts of 489|0|0|0. The ALT base, C, has a MAF of 0.00%
in the father, this position has ACGT counts of 14|0|546|4. The ALT base, G, has a MAF of 96.81%
genotype of mother: AA
genotype of father: GG
in the child, this position has ACGT counts of 238|0|203|4. The ALT base, G, has a MAF of 45.62%
genotype of child : AG
of the 294 reads which call the DNM ALT, 136 (46.26%) also make a call at the informative (= can phase with it) locus
the number of reads that make biallelic calls, i.e. REF or ALT, at both loci ('DNM' and 'phasingSNP') are as follows:
	phasingSNP REF (A)	phasingSNP ALT (G)
DNM REF (G)	132	18
DNM ALT (C)	18	118
of the 136 reads that call the DNM ALT (i.e. C), 13.24% also call the phasingSNP REF and 86.76% also call the phasingSNP ALT
of the 150 reads that call the DNM REF (i.e. G), 88.00% also call the phasingSNP REF and 12.00% also call the phasingSNP ALT
two-sided Fisher's exact test. Odds ratio = 46.90309, p = 2.619083e-40
predicted phasing: paternal
FAM09
the DNM occurs at 10:75029026 and is CTCT/CT
there are 130 reads which call the DNM ALT and 238 reads which call the DNM REF
there is a candidate phasing SNP 7579 bases from the DNM. it is rs148242818, a A/G,T
in the mother, this position has ACGT counts of 307|0|1|0. The ALT base, G, has a MAF of 0.32%
in the father, this position has ACGT counts of 85|0|0|85. The ALT base, T, has a MAF of 50.00%
genotype of mother: AA
genotype of father: AT
in the child, this position has ACGT counts of 96|0|0|97. The ALT base, T, has a MAF of 50.26%
genotype of child : AT
of the 130 reads which call the DNM ALT, 66 (50.77%) also make a call at the informative (= can phase with it) locus
the number of reads that make biallelic calls, i.e. REF or ALT, at both loci ('DNM' and 'phasingSNP') are as follows:
	phasingSNP REF (A)	phasingSNP ALT (T)
DNM REF (CTCT)	28	73
DNM ALT (CT)	55	11
of the 66 reads that call the DNM ALT (i.e. CT), 83.33% also call the phasingSNP REF and 16.67% also call the phasingSNP ALT
of the 101 reads that call the DNM REF (i.e. CTCT), 27.72% also call the phasingSNP REF and 72.28% also call the phasingSNP ALT
two-sided Fisher's exact test. Odds ratio = 0.07817505. p = 8.331x10-13
predicted phasing: maternal
FAM10
the DNM occurs at 3:12604200 and is G/A
there are 227 reads which call the DNM ALT and 285 reads which call the DNM REF
there is a candidate phasing SNP 6695 bases from the DNM. it is rs186169149, a T/G
in the mother, this position has ACGT counts of 2|2|5|344. The ALT base, G, has a MAF of 1.42%
in the father, this position has ACGT counts of 4|0|228|136. The ALT base, G, has a MAF of 61.96%
genotype of mother: TT
genotype of father: TG
in the child, this position has ACGT counts of 0|1|175|185. The ALT base, G, has a MAF of 48.48%
genotype of child : TG
of the 227 reads which call the DNM ALT, 92 (40.53%) also make a call at the informative (= can phase with it) locus
the number of reads that make biallelic calls, i.e. REF or ALT, at both loci ('DNM' and 'phasingSNP') are as follows:
	phasingSNP REF (T)	phasingSNP ALT (G)
DNM REF (G)	126	4
DNM ALT (A)	1	91
of the 92 reads that call the DNM ALT (i.e. A), 1.09% also call the phasingSNP REF and 98.91% also call the phasingSNP ALT
of the 130 reads that call the DNM REF (i.e. G), 96.92% also call the phasingSNP REF and 3.08% also call the phasingSNP ALT
two-sided Fisher's exact test. Odds ratio = 2233.88, p = 2.903399e-56
predicted phasing: paternal
FAM11
phasing of this DNM was resolved manually
the DNM occurs at 5:177210198 and is CAA/C
there are 518 reads which call the DNM ALT and 885 reads which call the DNM REF
There is a candidate phasing SNP (i.e. heterozygous in the proband) located 50 bases from the DNM. It is rs3733874, a G/A. However, this SNP is not sufficiently informative to phase the DNM by itself as it is G/A heterozygous in all three of mother, father, and child.
	DNM REF (CAA)	DNM ALT (C)
rs3733874 REF (G)	8	86	note: the paternal/maternal colours in this table could only be assigned retrospectively, by reference to the table below
rs3733874 ALT (A)	109	0
two-sided Fisher's exact test. Odds ratio = 0, p = 5.002748e-64
rs3733874 is only informative when used in conjunction with rs145228074, a C/T 1449 bases from the DNM.
genotype of mother: CT
genotype of father: CC
genotype of child: CC
	rs3733874 REF (G)	rs3733874 ALT (A)
rs145228074 REF (C)	21	52
rs145228074 ALT (T)	44	3
two-sided Fisher's exact test. Odds ratio = 0.02857127, p = 3.47x10-13
interpretation:
from the first table, the DNM ALT is in phase with rs3733874 REF (G)
from the second table, the rs3733874G REF is paternally inherited because it is in phase with rs145228074T ALT
therefore, the DNM is on the paternally-derived allele
predicted phasing: paternal
FAM12a
phasing of this family was resolved without long-read Nanopore sequencing because an informative SNP was found in the vicinity of the DNM on the amplicon used for Deep-NGS (Illumina)
the DNM occurs at 6:146434376 and is C/CC
there is a candidate phasing SNP 48 bases from the DNM. it is rs1047006, a T/G
genotype of mother: T/G
genotype of father: G/G
genotype of child: T/G
the number of reads that make biallelic calls, i.e. REF or ALT, at both loci ('DNM' and 'phasingSNP') are as follows:
	DNM REF (C)	DNM ALT (CC)
phasingSNP REF (T)	60	0
phasingSNP ALT (G)	0	46
two-sided Fisher's exact test. Odds ratio = Inf, p = 3.994419e-31
predicted phasing: paternal
FAM13
the DNM occurs at 8:23007627 and is G/A
there are 393 reads which call the DNM ALT and 360 reads which call the DNM REF
there is a candidate phasing SNP 2650 bases from the DNM. it is rs73672962, a C/G
in the mother, this position has ACGT counts of 4|319|351|2. The ALT base, G, has a MAF of 51.92%
in the father, this position has ACGT counts of 5|608|0|3. The ALT base, G, has a MAF of 0.00%
genotype of mother: CG
genotype of father: CC
in the child, this position has ACGT counts of 2|390|430|6. The ALT base, G, has a MAF of 51.93%
genotype of child: CG
of the 393 reads which call the DNM ALT, 246 (62.60%) also make a call at the informative (= can phase with it) locus
the number of reads that make biallelic calls, i.e. REF or ALT, at both loci ('DNM' and 'phasingSNP') are as follows:
	phasingSNP REF (C)	phasingSNP ALT (G)
DNM REF (G)	191	24
DNM ALT (A)	15	231
of the 246 reads that call the DNM ALT (i.e. A), 6.10% also call the phasingSNP REF and 93.90% also call the phasingSNP ALT
of the 215 reads that call the DNM REF (i.e. G), 88.84% also call the phasingSNP REF and 11.16% also call the phasingSNP ALT
two-sided Fisher's exact test. Odds ratio = 119.7387, p = 1.116946e-81
predicted phasing: maternal
FAM15
the DNM occurs at 3:12604194 and is G/C
there are 788 reads which call the DNM ALT and 1004 reads which call the DNM REF
there is a candidate phasing SNP 2545 bases from the DNM. it is rs1963609, a T/C
in the mother, this position has ACGT counts of 0|74|0|62. The ALT base, C, has a MAF of 54.41%
in the father, this position has ACGT counts of 0|8|0|637. The ALT base, C, has a MAF of 1.24%
genotype of mother: TC
genotype of father: TT
in the child, this position has ACGT counts of 4|317|0|305. The ALT base, C, has a MAF of 50.64%
genotype of child: TC
of the 788 reads which call the DNM ALT, 218 (27.66%) also make a call at the informative (= can phase with it) locus
the number of reads that make biallelic calls, i.e. REF or ALT, at both loci ('DNM' and 'phasingSNP') are as follows:
	phasingSNP REF (T)	phasingSNP ALT (C)
DNM REF (G)	9	278
DNM ALT (C)	213	5
of the 218 reads that call the DNM ALT (i.e. C), 97.71% also call the phasingSNP REF and 2.29% also call the phasingSNP ALT
of the 287 reads that call the DNM REF (i.e. G), 3.14% also call the phasingSNP REF and 96.86% also call the phasingSNP ALT
two-sided Fisher's exact test. Odds ratio = 0.0008116559, p = 1.349054e-123										`
predicted phasing: paternal
FAM16
phasing of this family was manually resolved: as the homopolymeric region around the DNM was technically challenging to align, the pileup generated by the long-read sequencing was manually inspected using IGV.
the DNM occurs at 16:2088584 and is TG/TTG
there is a candidate phasing SNP 7810 bases from the DNM. it is rs56201105, a G/A
genotype of mother: GA
genotype of father: GG
genotype of child: GA
the number of reads that make biallelic calls, i.e. REF or ALT, at both loci ('DNM' and 'phasingSNP') are as follows:
	DNM REF (TG)	DNM ALT (TTG)
phasingSNP REF (G)	100	142
phasingSNP ALT (A)	170	36
two-sided Fisher's exact test. Odds ratio = 0.1498266, p = 1.360177e-19
predicted phasing: paternal
FAM17
the DNM occurs at 12:112477651 and is T/C
there are 350 reads which call the DNM ALT and 448 reads which call the DNM REF
there is a candidate phasing SNP 9040 bases from the DNM. it is rs11066320, a A/G,T
in the mother, this position has ACGT counts of 33|0|1125|0. The ALT base, G, has a MAF of 97.15%
in the father, this position has ACGT counts of 1134|0|47|1. The ALT base, G, has a MAF of 3.98%
genotype of mother: GG
genotype of father: AA
in the child, this position has ACGT counts of 364|2|394|1. The ALT base, G, has a MAF of 51.77%
genotype of child : AG
of the 350 reads which call the DNM ALT, 217 (62.00%) also make a call at the informative (= can phase with it) locus
the number of reads that make biallelic calls, i.e. REF or ALT, at both loci ('DNM' and 'phasingSNP') are as follows:
	phasingSNP REF (A)	phasingSNP ALT (G)
DNM REF (T)	185	62
DNM ALT (C)	42	175
of the 217 reads that call the DNM ALT (i.e. C), 19.35% also call the phasingSNP REF and 80.65% also call the phasingSNP ALT
of the 247 reads that call the DNM REF (i.e. T), 74.90% also call the phasingSNP REF and 25.10% also call the phasingSNP ALT
two-sided Fisher's exact test. Odds ratio = 12.34655, p = 1.87075e-34
predicted phasing: maternal
FAM19
the DNM occurs at 10:110964362 and is A/G
there are 158 reads which call the DNM ALT and 250 reads which call the DNM REF
there is a candidate phasing SNP 5305 bases from the DNM. it is rs7901832, a T/A,C
in the mother, this position has ACGT counts of 0|141|0|158. The ALT base, C, has a MAF of 47.16%
in the father, this position has ACGT counts of 1|258|0|8. The ALT base, C, has a MAF of 96.63%
genotype of mother: TC
genotype of father: CC
in the child, this position has ACGT counts of 0|125|0|150. The ALT base, C, has a MAF of 45.45%
genotype of child : TC
of the 158 reads which call the DNM ALT, 96 (60.76%) also make a call at the informative (= can phase with it) locus
the number of reads that make biallelic calls, i.e. REF or ALT, at both loci ('DNM' and 'phasingSNP') are as follows:
	phasingSNP REF (T)	phasingSNP ALT (C)
DNM REF (A)	94	6
DNM ALT (G)	6	90
of the 96 reads that call the DNM ALT (i.e. G), 6.25% also call the phasingSNP REF and 93.75% also call the phasingSNP ALT
of the 100 reads that call the DNM REF (i.e. A), 94.00% also call the phasingSNP REF and 6.00% also call the phasingSNP ALT
two-sided Fisher's exact test. Odds ratio = 217.0944, p = 3.152027e-40
predicted phasing: paternal
FAM20
the DNM occurs at 17:59681719 and is T/C
there are 288 reads which call the DNM ALT and 462 reads which call the DNM REF
there is a candidate phasing SNP 6211 bases from the DNM. it is rs72839092, a C/T
in the mother, this position has ACGT counts of 0|723|0|17. The ALT base, T, has a MAF of 2.30%
in the father, this position has ACGT counts of 5|459|0|368. The ALT base, T, has a MAF of 44.23%
genotype of mother: CC
genotype of father: CT
in the child, this position has ACGT counts of 4|377|0|325. The ALT base, T, has a MAF of 46.03%
genotype of child : CT
of the 288 reads which call the DNM ALT, 157 (54.51%) also make a call at the informative (= can phase with it) locus
the number of reads that make biallelic calls, i.e. REF or ALT, at both loci ('DNM' and 'phasingSNP') are as follows:
	phasingSNP REF (C)	phasingSNP ALT (T)
DNM REF (T)	235	21
DNM ALT (C)	14	143
of the 157 reads that call the DNM ALT (i.e. C), 8.92% also call the phasingSNP REF and 91.08% also call the phasingSNP ALT
of the 256 reads that call the DNM REF (i.e. T), 91.80% also call the phasingSNP REF and 8.20% also call the phasingSNP ALT
two-sided Fisher's exact test. Odds ratio = 111.0445, p = 8.765779e-70
predicted phasing: paternal
FAM21
phasing of this family was resolved without Nanopore sequencing because an informative SNP was found on the Illumina (Deep-Seq) fragment
the DNM occurs at 17:44880581 and is A/AA
there is a candidate phasing SNP 94 bases from the DNM. it is rs1443463, a A/G
genotype of mother: A/G
genotype of father: A/A
genotype of child: A/G
the number of reads that make biallelic calls, i.e. REF or ALT, at both loci ('DNM' and 'phasingSNP') are as follows:
	DNM REF (A)	DNM ALT (AA)
phasingSNP REF (A)	48	2
phasingSNP ALT (G)	2	47
two-sided Fisher's exact test. Odds ratio = 442.0418, p = 2.979693e-23
predicted phasing: paternal
FAM24
the DNM occurs at X:64192230 and is G/A
there are 1033 reads which call the DNM ALT and 727 reads which call the DNM REF
there is a candidate phasing SNP 1417 bases from the DNM. it is rs55766931, a C/T
in the mother, this position has ACGT counts of 10|3962|3|3310. The ALT base, T, has a MAF of 45.44%
in the father, this position has ACGT counts of 1|1490|0|4. The ALT base, T, has a MAF of 0.27%
genotype of mother: CT
genotype of father: C
in the child, this position has ACGT counts of 2|1340|2|1108. The ALT base, T, has a MAF of 45.19%
genotype of child : CT
of the 1033 reads which call the DNM ALT, 904 (87.51%) also make a call at the informative (= can phase with it) locus
the number of reads that make biallelic calls, i.e. REF or ALT, at both loci ('DNM' and 'phasingSNP') are as follows:
	phasingSNP REF (C)	phasingSNP ALT (T)
DNM REF (G)	114	520
DNM ALT (A)	803	101
of the 904 reads that call the DNM ALT (i.e. A), 88.83% also call the phasingSNP REF and 11.17% also call the phasingSNP ALT
of the 634 reads that call the DNM REF (i.e. G), 17.98% also call the phasingSNP REF and 82.02% also call the phasingSNP ALT
two-sided Fisher's exact test. Odds ratio = 0.02769028, p = 3.809618e-185
predicted phasing: paternal
FAM25
the DNM occurs at 5:140114651 and is T/G
there are 3274 reads which call the DNM ALT and 3532 reads which call the DNM REF
there is a candidate phasing SNP 3665 bases from the DNM. it is rs115129982, a G/A
in the mother, this position has ACGT counts of 4422|4|4016|14. The ALT base, A, has a MAF of 52.29%
in the father, this position has ACGT counts of 29|1|8928|3. The ALT base, A, has a MAF of 0.32%
genotype of mother: GA
genotype of father: GG
in the child, this position has ACGT counts of 3825|1|3744|9. The ALT base, A, has a MAF of 50.47%
genotype of child : GA
of the 3274 reads which call the DNM ALT, 2829 (86.41%) also make a call at the informative (= can phase with it) locus
the number of reads that make biallelic calls, i.e. REF or ALT, at both loci ('DNM' and 'phasingSNP') are as follows:
	phasingSNP REF (G)	phasingSNP ALT (A)
DNM REF (T)	2872	51
DNM ALT (G)	49	2780
of the 2829 reads that call the DNM ALT (i.e. G), 1.73% also call the phasingSNP REF and 98.27% also call the phasingSNP ALT
of the 2923 reads that call the DNM REF (i.e. T), 98.26% also call the phasingSNP REF and 1.74% also call the phasingSNP ALT
two-sided Fisher's exact test. Odds ratio = 3358.474, p = 0
predicted phasing: maternal
FAM27
the DNM occurs at X:154031021 and is NC/C
there are 1249 reads which call the DNM ALT and 210 reads which call the DNM REF
there is a candidate phasing SNP 4292 bases from the DNM. it is rs2734647, a T/C
in the mother, this position has ACGT counts of 0|4|1|416. The ALT base, C, has a MAF of 0.95%
in the father, this position has ACGT counts of 0|356|4|7. The ALT base, C, has a MAF of 97.00%
genotype of mother: TT
genotype of father: C
in the child, this position has ACGT counts of 0|17|0|23. The ALT base, C, has a MAF of 42.50%
genotype of child : TC
of the 1249 reads which call the DNM ALT, 14 (1.12%) also make a call at the informative (= can phase with it) locus
the number of reads that make biallelic calls, i.e. REF or ALT, at both loci ('DNM' and 'phasingSNP') are as follows:
	phasingSNP REF (T)	phasingSNP ALT (C)
DNM REF (GC)	18	0
DNM ALT (C)	2	12
of the 14 reads that call the DNM ALT (i.e. C), 14.29% also call the phasingSNP REF and 85.71% also call the phasingSNP ALT
of the 18 reads that call the DNM REF (i.e. NC), 100.00% also call the phasingSNP REF and 0.00% also call the phasingSNP ALT
two-sided Fisher's exact test. Odds ratio = Inf, p = 4.03x10-7
predicted phasing: paternal
FAM30
the DNM occurs at 2:47161756 and is C/A
there are 724 reads which call the DNM ALT and 778 reads which call the DNM REF
there is a candidate phasing SNP 1698 bases from the DNM. it is rs187405330, a T/C
in the mother, this position has ACGT counts of 4|7|1|1841. The ALT base, C, has a MAF of 0.38%
in the father, this position has ACGT counts of 2|674|11|713. The ALT base, C, has a MAF of 48.14%
genotype of mother: TT
genotype of father: TC
in the child, this position has ACGT counts of 1|257|5|284. The ALT base, C, has a MAF of 46.98%
genotype of child : TC
of the 724 reads which call the DNM ALT, 212 (29.28%) also make a call at the informative (= can phase with it) locus
the number of reads that make biallelic calls, i.e. REF or ALT, at both loci ('DNM' and 'phasingSNP') are as follows:
	phasingSNP REF (T)	phasingSNP ALT (C)
DNM REF (C)	244	5
DNM ALT (A)	1	211
of the 212 reads that call the DNM ALT (i.e. A), 0.47% also call the phasingSNP REF and 99.53% also call the phasingSNP ALT
of the 249 reads that call the DNM REF (i.e. C), 97.99% also call the phasingSNP REF and 2.01% also call the phasingSNP ALT
two-sided Fisher's exact test. Odds ratio = 10454.18, p = 1.826022e-125
predicted phasing: paternal
FAM31
the DNM occurs at 6:33437769 and is CATGCTG/C
there are 51 reads which call the DNM ALT and 89 reads which call the DNM REF
there is a candidate phasing SNP 2124 bases from the DNM. it is rs453590, a C/A,T
in the mother, this position has ACGT counts of 0|0|0|48. The ALT base, T, has a MAF of 100.00%
in the father, this position has ACGT counts of 1|27|0|23. The ALT base, T, has a MAF of 45.10%
genotype of mother: TT
genotype of father: CT
in the child, this position has ACGT counts of 0|49|0|45. The ALT base, T, has a MAF of 47.87%
genotype of child : CT
of the 51 reads which call the DNM ALT, 32 (62.75%) also make a call at the informative (= can phase with it) locus
the number of reads that make biallelic calls, i.e. REF or ALT, at both loci ('DNM' and 'phasingSNP') are as follows:
	phasingSNP REF (C)	phasingSNP ALT (T)
DNM REF (CATGCTG)	45	43
DNM ALT (C)	29	3
of the 32 reads that call the DNM ALT (i.e. C), 90.62% also call the phasingSNP REF and 9.38% also call the phasingSNP ALT
of the 88 reads that call the DNM REF (i.e. CATGCTG), 51.14% also call the phasingSNP REF and 48.86% also call the phasingSNP ALT
two-sided Fisher's exact test. Odds ratio = 0.1100182, p = 4.602x10-5
predicted phasing: paternal
FAM32
the DNM occurs at 3:189890806 and is G/T
there are 451 reads which call the DNM ALT and 566 reads which call the DNM REF
there is a candidate phasing SNP 969 bases from the DNM. it is rs6790068, a A/C,G
in the mother, this position has ACGT counts of 740|6|765|4. The ALT base, G, has a MAF of 50.50%
in the father, this position has ACGT counts of 9|4|1133|1. The ALT base, G, has a MAF of 98.78%
genotype of mother: AG
genotype of father: GG
in the child, this position has ACGT counts of 388|2|430|0. The ALT base, G, has a MAF of 52.44%
genotype of child : AG
of the 451 reads which call the DNM ALT, 360 (79.82%) also make a call at the informative (= can phase with it) locus
the number of reads that make biallelic calls, i.e. REF or ALT, at both loci ('DNM' and 'phasingSNP') are as follows:
	phasingSNP REF (A)	phasingSNP ALT (G)
DNM REF (G)	308	11
DNM ALT (T)	4	356
of the 360 reads that call the DNM ALT (i.e. T), 1.11% also call the phasingSNP REF and 98.89% also call the phasingSNP ALT
of the 319 reads that call the DNM REF (i.e. G), 96.55% also call the phasingSNP REF and 3.45% also call the phasingSNP ALT
two-sided Fisher's exact test. Odds ratio = 2337.102, p = 6.089297e-174
predicted phasing: paternal
FAM34
the DNM occurs at 20:63407093 and is GGTGGCTC/G
there are 378 reads which call the DNM ALT and 719 reads which call the DNM REF
there is a candidate phasing SNP 68 bases from the DNM. it is rs1801471, a A/T
in the mother, this position has ACGT counts of 6|10|3|1088. The ALT base, T, has a MAF of 98.28%
in the father, this position has ACGT counts of 781|3|9|906. The ALT base, T, has a MAF of 53.33%
genotype of mother: TT
genotype of father: AT
in the child, this position has ACGT counts of 336|5|6|391. The ALT base, T, has a MAF of 52.98%
genotype of child : AT
of the 378 reads which call the DNM ALT, 194 (51.32%) also make a call at the informative (= can phase with it) locus
the number of reads that make biallelic calls, i.e. REF or ALT, at both loci ('DNM' and 'phasingSNP') are as follows:
	phasingSNP REF (A)	phasingSNP ALT (T)
DNM REF (GGTGGCTC)	117	383
DNM ALT (G)	191	3
of the 194 reads that call the DNM ALT (i.e. G), 98.45% also call the phasingSNP REF and 1.55% also call the phasingSNP ALT
of the 500 reads that call the DNM REF (i.e. GGTGGCTC), 23.40% also call the phasingSNP REF and 76.60% also call the phasingSNP ALT
two-sided Fisher's exact test. Odds ratio = 0.004820634, p = 7.129071e-52
predicted phasing: paternal
FAM35
the DNM occurs at 2:199349041 and is GG/G
there are 26 reads which call the DNM ALT and 55 reads which call the DNM REF
there is a candidate phasing SNP 9508 bases from the DNM. it is rs748616466, a T/C
in the mother, this position has ACGT counts of 0|3|0|47. The ALT base, C, has a MAF of 6.00%
in the father, this position has ACGT counts of 0|34|0|27. The ALT base, C, has a MAF of 55.74%
genotype of mother: TT
genotype of father: TC
in the child, this position has ACGT counts of 0|27|0|30. The ALT base, C, has a MAF of 47.37%
genotype of child : TC
of the 26 reads which call the DNM ALT, 12 (46.15%) also make a call at the informative (= can phase with it) locus
the number of reads that make biallelic calls, i.e. REF or ALT, at both loci ('DNM' and 'phasingSNP') are as follows:
	phasingSNP REF (T)	phasingSNP ALT (C)
DNM REF (GG)	20	4
DNM ALT (G)	0	12
of the 12 reads that call the DNM ALT (i.e. G), 0.00% also call the phasingSNP REF and 100.00% also call the phasingSNP ALT
of the 24 reads that call the DNM REF (i.e. GG), 83.33% also call the phasingSNP REF and 16.67% also call the phasingSNP ALT
two-sided Fisher's exact test. Odds ratio = Inf, p = 1.454x10-6
predicted phasing: paternal
FAM38
Phasing of this DNM was resolved manually using a custom allele-specific assay, described below.
The DNM occurs at 1:27548981 and is GG/G. The custom assay was required as this DNM is located within a homopolymeric region (wild type GGGGG vs. mutant GGGG) which ONT sequencing could not unambiguously discriminate.
There are 429 reads which call the DNM ALT and 1162 reads which call the DNM REF
There is a candidate phasing SNP (i.e. heterozygous in the proband) located 990 bases from the DNM. It is rs2076457, a C/A. However, this SNP is not sufficiently informative to phase the DNM by itself as it is C/A heterozygous in all three of mother, father, and child.
rs2076457 is only informative when used in conjunction with rs113173951, a G/A SNP located 1926 bases from the DNM.
genotype of mother for rs113173951: GA
genotype of father for rs113173951: GG
genotype of child for rs113173951: GG
	rs2076457 REF (C)	rs2076457 ALT (A)
rs113173951 REF (G)	107	0
rs113173951 ALT (A)	0	106
two-sided Fisher's exact test. Odds ratio = Inf, p = 1.394393e-63
From the table above, rs2076457 REF (C) is paternally inherited because it is in phase with rs141330147 REF (G) and that rs2076457 ALT (A) is maternally inherited because it is in phase with rs141330147 ALT (A).
Having established the parent-of-origin of each of the two rs2076457 C/A alleles in the proband, we used this SNP located 990bp away from the DNM, to phase the DNM.
To do so, we performed an allele-specific PCR on the proband DNA encompassing both rs2076457 and the DNM, amplifying only the maternally-derived rs2076457 C allele (using reverse primer 5'-CAGCCGCTGGGGTCGGGGGCaCG-3' where a represents a deliberate mismatch and G is rs2076457 C allele-specific, combined with a forward primer including g.1:27548900-27548920, to generate a fragment of approx. 1.1kb)
Dideoxy-sequencing of this PCR fragment revealed that the DNM is in phase with the maternally-derived rs2076457 C allele. (see Methods)
Therefore, the DNM can be phased to the maternally-derived allele.
predicted phasing: maternal
FAM39
the DNM occurs at 2:199348709 and is G/A
there are 2507 reads which call the DNM ALT and 3238 reads which call the DNM REF
there is a candidate phasing SNP 372 bases from the DNM. it is rs10153805, a A/C,G
in the mother, this position has ACGT counts of 2305|0|5|1. The ALT base, G, has a MAF of 0.22%
in the father, this position has ACGT counts of 1089|1|1112|0. The ALT base, G, has a MAF of 50.50%
genotype of mother: AA
genotype of father: AG
in the child, this position has ACGT counts of 1325|1|1204|0. The ALT base, G, has a MAF of 47.59%
genotype of child : AG
of the 2507 reads which call the DNM ALT, 1078 (43.00%) also make a call at the informative (= can phase with it) locus
the number of reads that make biallelic calls, i.e. REF or ALT, at both loci ('DNM' and 'phasingSNP') are as follows:
	phasingSNP REF (A)	phasingSNP ALT (G)
DNM REF (G)	1013	23
DNM ALT (A)	35	1043
of the 1078 reads that call the DNM ALT (i.e. A), 3.25% also call the phasingSNP REF and 96.75% also call the phasingSNP ALT
of the 1036 reads that call the DNM REF (i.e. G), 97.78% also call the phasingSNP REF and 2.22% also call the phasingSNP ALT
two-sided Fisher's exact test. Odds ratio = 1297.966, p = 0
predicted phasing: paternal
FAM41
the DNM occurs at 18:44951942 and is G/A
there are 603 reads which call the DNM ALT and 737 reads which call the DNM REF
there is a candidate phasing SNP 6456 bases from the DNM. it is rs4890493, a A/G,T
in the mother, this position has ACGT counts of 2127|2|2030|3. The ALT base, G, has a MAF of 48.77%
in the father, this position has ACGT counts of 3|0|549|0. The ALT base, G, has a MAF of 99.46%
genotype of mother: AG
genotype of father: GG
in the child, this position has ACGT counts of 105|0|120|0. The ALT base, G, has a MAF of 53.33%
genotype of child : AG
of the 603 reads which call the DNM ALT, 84 (13.93%) also make a call at the informative (= can phase with it) locus
the number of reads that make biallelic calls, i.e. REF or ALT, at both loci ('DNM' and 'phasingSNP') are as follows:
	phasingSNP REF (A)	phasingSNP ALT (G)
DNM REF (G)	87	4
DNM ALT (A)	3	81
of the 84 reads that call the DNM ALT (i.e. A), 3.57% also call the phasingSNP REF and 96.43% also call the phasingSNP ALT
of the 91 reads that call the DNM REF (i.e. G), 95.60% also call the phasingSNP REF and 4.40% also call the phasingSNP ALT
two-sided Fisher's exact test. Odds ratio = 511.5204, p = 9.51962e-41
predicted phasing: paternal
FAM42
phasing of this family was resolved without Nanopore sequencing because an informative SNP was found on the Illumina (Deep-Seq) fragment
the DNM occurs at 19:41869154_41869155 and is delTG
there is a candidate phasing SNP 73 bases from the DNM. it is rs1366610, a A/G
genotype of mother: A/G
genotype of father: A/A
genotype of child: A/G
the number of reads that make biallelic calls, i.e. REF or ALT, at both loci ('DNM' and 'phasingSNP') are as follows:
	DNM REF (TG)	DNM ALT (delTG)
phasingSNP REF (A)	11	92
phasingSNP ALT (G)	95	1
two-sided Fisher's exact test. Odds ratio = 0.001362373, p = 6.501797e-43
predicted phasing: paternal
FAM43
the DNM occurs at 8:60741901 and is C/T
there are 73 reads which call the DNM ALT and 59 reads which call the DNM REF
there is a candidate phasing SNP 5687 bases from the DNM. it is rs17292465, a A/T
in the mother, this position has ACGT counts of 156|0|1|100. The ALT base, T, has a MAF of 38.91%
in the father, this position has ACGT counts of 1089|2|6|10. The ALT base, T, has a MAF of 0.90%
genotype of mother: AT
genotype of father: AA
in the child, this position has ACGT counts of 108|0|1|49. The ALT base, T, has a MAF of 31.01%
genotype of child : AT
of the 73 reads which call the DNM ALT, 52 (71.23%) also make a call at the informative (= can phase with it) locus
the number of reads that make biallelic calls, i.e. REF or ALT, at both loci ('DNM' and 'phasingSNP') are as follows:
	phasingSNP REF (A)	phasingSNP ALT (T)
DNM REF (C)	9	30
DNM ALT (T)	51	1
of the 52 reads that call the DNM ALT (i.e. T), 98.08% also call the phasingSNP REF and 1.92% also call the phasingSNP ALT
of the 39 reads that call the DNM REF (i.e. C), 23.08% also call the phasingSNP REF and 76.92% also call the phasingSNP ALT
two-sided Fisher's exact test. Odds ratio = 0.006448054, p = 5.608x10-15
predicted phasing: paternal
FAM44
the DNM occurs at 12:47975568 and is C/G
there are 681 reads which call the DNM ALT and 717 reads which call the DNM REF
there is a candidate phasing SNP 1522 bases from the DNM. it is rs1635560, a G/A
in the mother, this position has ACGT counts of 1846|1|1892|0. The ALT base, A, has a MAF of 49.37%
in the father, this position has ACGT counts of 11|1|3768|0. The ALT base, A, has a MAF of 0.29%
genotype of mother: GA
genotype of father: GG
in the child, this position has ACGT counts of 394|0|374|0. The ALT base, A, has a MAF of 51.30%
genotype of child : GA
of the 681 reads which call the DNM ALT, 299 (43.91%) also make a call at the informative (= can phase with it) locus
the number of reads that make biallelic calls, i.e. REF or ALT, at both loci ('DNM' and 'phasingSNP') are as follows:
	phasingSNP REF (G)	phasingSNP ALT (A)
DNM REF (C)	10	321
DNM ALT (G)	297	2
of the 299 reads that call the DNM ALT (i.e. G), 99.33% also call the phasingSNP REF and 0.67% also call the phasingSNP ALT
of the 331 reads that call the DNM REF (i.e. C), 3.02% also call the phasingSNP REF and 96.98% also call the phasingSNP ALT
two-sided Fisher's exact test. Odds ratio = 0.0002404898, p = 1.462046e-165
predicted phasing: paternal
FAM45
the DNM occurs at 14:102002949 and is C/T
there are 219 reads which call the DNM ALT and 169 reads which call the DNM REF
there is a candidate phasing SNP 12916 bases from the DNM. it is rs17540832, a C/A
in the mother, this position has ACGT counts of 203|192|0|0. The ALT base, A, has a MAF of 51.39%
in the father, this position has ACGT counts of 0|777|0|0. The ALT base, A, has a MAF of 0.00%
genotype of mother: CA
genotype of father: CC
in the child, this position has ACGT counts of 222|235|3|0. The ALT base, A, has a MAF of 48.26%
genotype of child : CA
of the 219 reads which call the DNM ALT, 145 (66.21%) also make a call at the informative (= can phase with it) locus
the number of reads that make biallelic calls, i.e. REF or ALT, at both loci ('DNM' and 'phasingSNP') are as follows:
	phasingSNP REF (C)	phasingSNP ALT (A)
DNM REF (C)	105	6
DNM ALT (T)	19	126
of the 145 reads that call the DNM ALT (i.e. T), 13.10% also call the phasingSNP REF and 86.90% also call the phasingSNP ALT
of the 111 reads that call the DNM REF (i.e. C), 94.59% also call the phasingSNP REF and 5.41% also call the phasingSNP ALT
two-sided Fisher's exact test. Odds ratio = 111.7589, p = 1.952137e-43
predicted phasing: maternal
FAM46
the DNM occurs at 10:110602966 and is C/G
there are 98 reads which call the DNM ALT and 101 reads which call the DNM REF
there is a candidate phasing SNP 5781 bases from the DNM. it is rs59832745, a A/G
in the mother, this position has ACGT counts of 27|1|2099|1. The ALT base, G, has a MAF of 98.64%
in the father, this position has ACGT counts of 682|0|5|0. The ALT base, G, has a MAF of 0.73%
genotype of mother: GG
genotype of father: AA
in the child, this position has ACGT counts of 111|0|110|0. The ALT base, G, has a MAF of 49.77%
genotype of child : AG
of the 98 reads which call the DNM ALT, 79 (80.61%) also make a call at the informative (= can phase with it) locus
the number of reads that make biallelic calls, i.e. REF or ALT, at both loci ('DNM' and 'phasingSNP') are as follows:
	phasingSNP REF (A)	phasingSNP ALT (G)
DNM REF (C)	5	84
DNM ALT (G)	78	1
of the 79 reads that call the DNM ALT (i.e. G), 98.73% also call the phasingSNP REF and 1.27% also call the phasingSNP ALT
of the 89 reads that call the DNM REF (i.e. C), 5.62% also call the phasingSNP REF and 94.38% also call the phasingSNP ALT
two-sided Fisher's exact test. Odds ratio = 0.0008650265, p = 1.6996e-40
predicted phasing: paternal
FAM48
the DNM occurs at 7:140801536 and is C/G
there are 79 reads which call the DNM ALT and 68 reads which call the DNM REF
there is a candidate phasing SNP 2536 bases from the DNM. it is rs58861259, a C/T
in the mother, this position has ACGT counts of 0|248|0|231. The ALT base, T, has a MAF of 48.23%
in the father, this position has ACGT counts of 0|862|0|0. The ALT base, T, has a MAF of 0.00%
genotype of mother: CT
genotype of father: CC
in the child, this position has ACGT counts of 0|74|0|59. The ALT base, T, has a MAF of 44.36%
genotype of child : CT
of the 79 reads which call the DNM ALT, 60 (75.95%) also make a call at the informative (= can phase with it) locus
the number of reads that make biallelic calls, i.e. REF or ALT, at both loci ('DNM' and 'phasingSNP') are as follows:
	phasingSNP REF (C)	phasingSNP ALT (T)
DNM REF (C)	2	50
DNM ALT (G)	60	0
of the 60 reads that call the DNM ALT (i.e. G), 100.00% also call the phasingSNP REF and 0.00% also call the phasingSNP ALT
of the 52 reads that call the DNM REF (i.e. C), 3.85% also call the phasingSNP REF and 96.15% also call the phasingSNP ALT
two-sided Fisher's exact test. Odds ratio = 0, p = 6.427708e-30
predicted phasing: paternal
FAM51
the DNM occurs at 2:166037862 and is C/T
there are 228 reads which call the DNM ALT and 204 reads which call the DNM REF
there is a candidate phasing SNP 142 bases from the DNM. it is rs2020318, a T/A,C
in the mother, this position has ACGT counts of 0|139|0|9. The ALT base, C, has a MAF of 93.92%
in the father, this position has ACGT counts of 0|120|1|129. The ALT base, C, has a MAF of 48.00%
genotype of mother: CC
genotype of father: TC
in the child, this position has ACGT counts of 0|56|0|65. The ALT base, C, has a MAF of 46.28%
genotype of child : TC
of the 228 reads which call the DNM ALT, 56 (24.56%) also make a call at the informative (= can phase with it) locus
the number of reads that make biallelic calls, i.e. REF or ALT, at both loci ('DNM' and 'phasingSNP') are as follows:
	phasingSNP REF (T)	phasingSNP ALT (C)
DNM REF (C)	1	45
DNM ALT (T)	56	0
of the 56 reads that call the DNM ALT (i.e. T), 100.00% also call the phasingSNP REF and 0.00% also call the phasingSNP ALT
of the 46 reads that call the DNM REF (i.e. C), 2.17% also call the phasingSNP REF and 97.83% also call the phasingSNP ALT
two-sided Fisher's exact test. Odds ratio = 0, p = 2.319466e-28
predicted phasing: paternal
FAM53
the DNM occurs at 17:50188538 and is C/T
there are 741 reads which call the DNM ALT and 1002 reads which call the DNM REF
there is a candidate phasing SNP 2878 bases from the DNM. it is rs2249492, a C/G,T
in the mother, this position has ACGT counts of 3|785|42|863. The ALT base, T, has a MAF of 50.97%
in the father, this position has ACGT counts of 1|1626|6|33. The ALT base, T, has a MAF of 1.98%
genotype of mother: CT
genotype of father: CC
in the child, this position has ACGT counts of 1|735|41|922. The ALT base, T, has a MAF of 54.27%
genotype of child : CT
of the 741 reads which call the DNM ALT, 531 (71.66%) also make a call at the informative (= can phase with it) locus
the number of reads that make biallelic calls, i.e. REF or ALT, at both loci ('DNM' and 'phasingSNP') are as follows:
	phasingSNP REF (C)	phasingSNP ALT (T)
DNM REF (C)	500	105
DNM ALT (T)	51	480
of the 531 reads that call the DNM ALT (i.e. T), 9.60% also call the phasingSNP REF and 90.40% also call the phasingSNP ALT
of the 605 reads that call the DNM REF (i.e. C), 82.64% also call the phasingSNP REF and 17.36% also call the phasingSNP ALT
two-sided Fisher's exact test. Odds ratio = 44.62626, p = 4.873984e-149
predicted phasing: maternal
FAM55
the DNM occurs at 9:127680243 and is G/A
there are 199 reads which call the DNM ALT and 346 reads which call the DNM REF
there is a candidate phasing SNP 180 bases from the DNM. it is rs79735301, a G/T
in the mother, this position has ACGT counts of 0|1|229|2. The ALT base, T, has a MAF of 0.86%
in the father, this position has ACGT counts of 1|0|102|89. The ALT base, T, has a MAF of 46.35%
genotype of mother: GG
genotype of father: GT
in the child, this position has ACGT counts of 0|0|93|90. The ALT base, T, has a MAF of 49.18%
genotype of child : GT
of the 199 reads which call the DNM ALT, 73 (36.68%) also make a call at the informative (= can phase with it) locus
the number of reads that make biallelic calls, i.e. REF or ALT, at both loci ('DNM' and 'phasingSNP') are as follows:
	phasingSNP REF (G)	phasingSNP ALT (T)
DNM REF (G)	82	2
DNM ALT (A)	0	73
of the 73 reads that call the DNM ALT (i.e. A), 0.00% also call the phasingSNP REF and 100.00% also call the phasingSNP ALT
of the 84 reads that call the DNM REF (i.e. G), 97.62% also call the phasingSNP REF and 2.38% also call the phasingSNP ALT
two-sided Fisher's exact test. Odds ratio = Inf, p = 3.504965e-43
predicted phasing: paternal
FAM56
the DNM occurs at 2:108751993 and is C/T
there are 323 reads which call the DNM ALT and 228 reads which call the DNM REF
there is a candidate phasing SNP 324 bases from the DNM. it is rs866114, a T/A,G
in the mother, this position has ACGT counts of 135|0|1|148. The ALT base, A, has a MAF of 47.54%
in the father, this position has ACGT counts of 9|2|0|705. The ALT base, A, has a MAF of 1.26%
genotype of mother: TA
genotype of father: TT
in the child, this position has ACGT counts of 200|0|1|184. The ALT base, A, has a MAF of 51.95%
genotype of child : TA
of the 323 reads which call the DNM ALT, 167 (51.70%) also make a call at the informative (= can phase with it) locus
the number of reads that make biallelic calls, i.e. REF or ALT, at both loci ('DNM' and 'phasingSNP') are as follows:
	phasingSNP REF (T)	phasingSNP ALT (A)
DNM REF (C)	101	1
DNM ALT (T)	2	165
of the 167 reads that call the DNM ALT (i.e. T), 1.20% also call the phasingSNP REF and 98.80% also call the phasingSNP ALT
of the 102 reads that call the DNM REF (i.e. C), 99.02% also call the phasingSNP REF and 0.98% also call the phasingSNP ALT
two-sided Fisher's exact test. Odds ratio = 7223.55, p = 5.109528e-71
predicted phasing: maternal
FAM57
the DNM occurs at 4:1213028 and is G/A
there are 297 reads which call the DNM ALT and 311 reads which call the DNM REF
there is a candidate phasing SNP 7792 bases from the DNM. it is rs567855962, a C/T
in the mother, this position has ACGT counts of 1|415|0|371. The ALT base, T, has a MAF of 47.14%
in the father, this position has ACGT counts of 0|391|0|6. The ALT base, T, has a MAF of 1.51%
genotype of mother: CT
genotype of father: CC
in the child, this position has ACGT counts of 0|166|0|203. The ALT base, T, has a MAF of 55.01%
genotype of child : CT
of the 297 reads which call the DNM ALT, 124 (41.75%) also make a call at the informative (= can phase with it) locus
the number of reads that make biallelic calls, i.e. REF or ALT, at both loci ('DNM' and 'phasingSNP') are as follows:
	phasingSNP REF (C)	phasingSNP ALT (T)
DNM REF (G)	6	133
DNM ALT (A)	122	2
of the 124 reads that call the DNM ALT (i.e. A), 98.39% also call the phasingSNP REF and 1.61% also call the phasingSNP ALT
of the 139 reads that call the DNM REF (i.e. G), 4.32% also call the phasingSNP REF and 95.68% also call the phasingSNP ALT
two-sided Fisher's exact test. Odds ratio = 0.0008333799, p = 1.032149e-64
predicted phasing: paternal
FAM61
the DNM occurs at 7:94420409 and is G/A
there are 487 reads which call the DNM ALT and 488 reads which call the DNM REF
there is a candidate phasing SNP 1176 bases from the DNM. it is rs10487255, a G/A
in the mother, this position has ACGT counts of 68|1|1704|1. The ALT base, A, has a MAF of 3.83%
in the father, this position has ACGT counts of 1489|0|77|5. The ALT base, A, has a MAF of 94.78%
genotype of mother: GG
genotype of father: AA
in the child, this position has ACGT counts of 531|3|572|5. The ALT base, A, has a MAF of 47.79%
genotype of child : GA
of the 487 reads which call the DNM ALT, 338 (69.40%) also make a call at the informative (= can phase with it) locus
the number of reads that make biallelic calls, i.e. REF or ALT, at both loci ('DNM' and 'phasingSNP') are as follows:
	phasingSNP REF (G)	phasingSNP ALT (A)
DNM REF (G)	38	283
DNM ALT (A)	331	7
of the 338 reads that call the DNM ALT (i.e. A), 97.93% also call the phasingSNP REF and 2.07% also call the phasingSNP ALT
of the 321 reads that call the DNM REF (i.e. G), 11.84% also call the phasingSNP REF and 88.16% also call the phasingSNP ALT
two-sided Fisher's exact test. Odds ratio = 0.002900389, p = 5.178185e-132
predicted phasing: maternal
FAM62
the DNM occurs at 9:132912382 and is A/C
there are 2942 reads which call the DNM ALT and 2661 reads which call the DNM REF
there is a candidate phasing SNP 3600 bases from the DNM. it is rs2106346, a A/C
in the mother, this position has ACGT counts of 96|4121|1|11. The ALT base, C, has a MAF of 97.45%
in the father, this position has ACGT counts of 907|841|3|5. The ALT base, C, has a MAF of 47.89%
genotype of mother: CC
genotype of father: AC
in the child, this position has ACGT counts of 1360|1294|0|5. The ALT base, C, has a MAF of 48.66%
genotype of child : AC
of the 2942 reads which call the DNM ALT, 942 (32.02%) also make a call at the informative (= can phase with it) locus
the number of reads that make biallelic calls, i.e. REF or ALT, at both loci ('DNM' and 'phasingSNP') are as follows:
	phasingSNP REF (A)	phasingSNP ALT (C)
DNM REF (A)	162	642
DNM ALT (C)	774	168
of the 942 reads that call the DNM ALT (i.e. C), 82.17% also call the phasingSNP REF and 17.83% also call the phasingSNP ALT
of the 804 reads that call the DNM REF (i.e. A), 20.15% also call the phasingSNP REF and 79.85% also call the phasingSNP ALT
two-sided Fisher's exact test. Odds ratio = 0.05490447, p = 3.087914e-158
predicted phasing: paternal
FAM64
the DNM occurs at 17:46171228 and is GT/T
there are 2158 reads which call the DNM ALT and 3111 reads which call the DNM REF
there is a candidate phasing SNP 1245 bases from the DNM. it is rs9911018, a C/T
in the mother, this position has ACGT counts of 0|2787|3|21. The ALT base, T, has a MAF of 0.75%
in the father, this position has ACGT counts of 5|1254|4|1120. The ALT base, T, has a MAF of 47.00%
genotype of mother: CC
genotype of father: CT
in the child, this position has ACGT counts of 4|1734|4|1718. The ALT base, T, has a MAF of 49.65%
genotype of child : CT
of the 2158 reads which call the DNM ALT, 1192 (55.24%) also make a call at the informative (= can phase with it) locus
the number of reads that make biallelic calls, i.e. REF or ALT, at both loci ('DNM' and 'phasingSNP') are as follows:
	phasingSNP REF (C)	phasingSNP ALT (T)
DNM REF (GT)	1385	295
DNM ALT (T)	110	1082
of the 1192 reads that call the DNM ALT (i.e. T), 9.23% also call the phasingSNP REF and 90.77% also call the phasingSNP ALT
of the 1680 reads that call the DNM REF (i.e. TG), 82.44% also call the phasingSNP REF and 17.56% also call the phasingSNP ALT
two-sided Fisher's exact test. Odds ratio = 46.08159, p = 4.596616e-163
predicted phasing: paternal
FAM66
the DNM occurs at 12:21818238 and is G/A
there are 3263 reads which call the DNM ALT and 3177 reads which call the DNM REF
there is a candidate phasing SNP 1133 bases from the DNM. it is rs7309274, a T/C
in the mother, this position has ACGT counts of 4|68|1|4948. The ALT base, C, has a MAF of 1.35%
in the father, this position has ACGT counts of 4|2341|1|2410. The ALT base, C, has a MAF of 49.22%
genotype of mother: TT
genotype of father: TC
in the child, this position has ACGT counts of 5|2055|0|2393. The ALT base, C, has a MAF of 46.15%
genotype of child : TC
of the 3263 reads which call the DNM ALT, 1004 (30.77%) also make a call at the informative (= can phase with it) locus
the number of reads that make biallelic calls, i.e. REF or ALT, at both loci ('DNM' and 'phasingSNP') are as follows:
	phasingSNP REF (T)	phasingSNP ALT (C)
DNM REF (G)	981	72
DNM ALT (A)	96	908
of the 1004 reads that call the DNM ALT (i.e. A), 9.56% also call the phasingSNP REF and 90.44% also call the phasingSNP ALT
of the 1053 reads that call the DNM REF (i.e. G), 93.16% also call the phasingSNP REF and 6.84% also call the phasingSNP ALT
two-sided Fisher's exact test. Odds ratio = 127.8339, p = 0
predicted phasing: paternal
FAM67
phasing of this DNM was resolved manually
the DNM occurs at 4:46262110 and is G/T
there are 1374 reads which call the DNM ALT and 1938 reads which call the DNM REF
there is a candidate phasing SNP (i.e. heterozygous in the proband) located 736 bases from the DNM. It is rs526805, a C/A. However, this SNP is not sufficiently informative to phase the DNM by itself as it is C/A heterozygous in all three of mother, father, and child.
	DNM REF (G)	DNM ALT (T)
rs526805 REF (C)	284	0
rs526805 ALT (A)	12	275
two-sided Fisher's exact test. Odds ratio = Inf, p = 4.254947e-150
rs526805 is only informative when used in conjunction with rs141330147, a G/A 9556 bases from the DNM and only heterozygous in the father.
genotype of mother: GG
genotype of father: GA
genotype of child: GG
	rs526805 REF (C)	rs526805 ALT (A)
rs141330147 REF (G)	36	127
rs141330147 ALT (A)	146	34
two-sided Fisher's exact test. Odds ratio = 0.06669551, p = 4.351061e-29
interpretation:
from the first table, the DNM ALT is in phase with rs526805 ALT (A)
from the second table, rs526805 ALT (A) is paternally inherited because it is in phase with rs141330147 REF (G)
therefore, the DNM can be phased to the paternally-derived allele
predicted phasing: paternal

## Sheet: Supplementary Data 4A
Supplementary Data 4A. Details of the common single nucleotide polymorphisms (SNPs) used for genotyping the members of family trios and verifying the family relationship (single-molecule Molecular Inversion Probe (smMIP) assay)
Chr	Position (GRCh38.p12)	dbSNP ID of target (if applicable)	REF allele	ALT allele	Total allele frequency across all populations (gnomAD v3.1.2)	gnomAD v3.1.2 URL
chr1	4307263	rs1490413	G	A	0.4665	https://gnomad.broadinstitute.org/variant/1-4307263-G-A?dataset=gnomad_r3
chr1	13475857	rs3013105	T	C	0.4315	https://gnomad.broadinstitute.org/variant/1-13475857-T-C?dataset=gnomad_r3
chr1	13475905	rs2940315	G	A	0.06566	https://gnomad.broadinstitute.org/variant/1-13475905-G-A?dataset=gnomad_r3
chr1	67395837	rs2229546	C	A	0.6144	https://gnomad.broadinstitute.org/variant/1-67395837-C-A?dataset=gnomad_r3
chr1	110456232	rs7514102	G	A	0.4144	https://gnomad.broadinstitute.org/variant/1-110456232-G-A?dataset=gnomad_r3
chr1	118101807	rs10754367	A	G	0.585	https://gnomad.broadinstitute.org/variant/1-118101807-A-G?dataset=gnomad_r3
chr1	153304947	rs843971	C	T	0.3962	https://gnomad.broadinstitute.org/variant/1-153304947-C-T?dataset=gnomad_r3
chr1	157698600	rs7522061	T	C	0.5029	https://gnomad.broadinstitute.org/variant/1-157698600-T-C?dataset=gnomad_r3
chr1	157698637	rs12140725	G	A	0.1648	https://gnomad.broadinstitute.org/variant/1-157698637-G-A?dataset=gnomad_r3
chr1	158480524	rs6679056	A	G	0.5245	https://gnomad.broadinstitute.org/variant/1-158480524-A-G?dataset=gnomad_r3
chr1	179551371	rs1410592	G	A	0.614	https://gnomad.broadinstitute.org/variant/1-179551371-G-A?dataset=gnomad_r3
chr1	183573252	rs2274064	T	C	0.4574	https://gnomad.broadinstitute.org/variant/1-183573252-T-C?dataset=gnomad_r3
chr1	225346517	rs7527925	T	C	0.4826	https://gnomad.broadinstitute.org/variant/1-225346517-T-C?dataset=gnomad_r3
chr1	238276008	rs10495407	G	A	0.2765	https://gnomad.broadinstitute.org/variant/1-238276008-G-A?dataset=gnomad_r3
chr1	239718626	rs891700	A	G	0.5076	https://gnomad.broadinstitute.org/variant/1-239718626-A-G?dataset=gnomad_r3
chr1	242643443	rs6669024	C	A	0.6863	https://gnomad.broadinstitute.org/variant/1-242643443-C-A?dataset=gnomad_r3
chr1	242643448	rs10926803	T	C	0.2408	https://gnomad.broadinstitute.org/variant/1-242643448-T-C?dataset=gnomad_r3
chr1	242643495	rs1413212	T	C	0.6864	https://gnomad.broadinstitute.org/variant/1-242643495-T-C?dataset=gnomad_r3
chr1	247876411	rs3811445	A	G	0.5968	https://gnomad.broadinstitute.org/variant/1-247876411-A-G?dataset=gnomad_r3
chr2	114924	rs77570793	G	A	0.037	https://gnomad.broadinstitute.org/variant/2-114924-G-A?dataset=gnomad_r3
chr2	114974	rs876724	C	T	0.2697	https://gnomad.broadinstitute.org/variant/2-114974-C-T?dataset=gnomad_r3
chr2	25136553	rs3731631	G	A	0.2861	https://gnomad.broadinstitute.org/variant/2-25136553-G-A?dataset=gnomad_r3
chr2	26581350	rs935171	G	A	0.9669	https://gnomad.broadinstitute.org/variant/2-26581350-G-A?dataset=gnomad_r3
chr2	26581379	rs935172	T	C	0.5201	https://gnomad.broadinstitute.org/variant/2-26581379-T-C?dataset=gnomad_r3
chr2	101022366	rs34685616	C	T	0.1033	https://gnomad.broadinstitute.org/variant/2-101022366-C-T?dataset=gnomad_r3
chr2	101022426	rs3739014	A	G	0.6163	https://gnomad.broadinstitute.org/variant/2-101022426-A-G?dataset=gnomad_r3
chr2	168932506	rs497692	T	C	0.4721	https://gnomad.broadinstitute.org/variant/2-168932506-T-C?dataset=gnomad_r3
chr2	185807185	rs1862066	G	A	0.5448	https://gnomad.broadinstitute.org/variant/2-185807185-G-A?dataset=gnomad_r3
chr2	191296113	rs4853574	A	T	0.53	https://gnomad.broadinstitute.org/variant/2-191296113-A-T?dataset=gnomad_r3
chr2	191296149	rs4853575	C	T	0.53	https://gnomad.broadinstitute.org/variant/2-191296149-C-T?dataset=gnomad_r3
chr2	217830379	rs3796028	G	A	0.3578	https://gnomad.broadinstitute.org/variant/2-217830379-G-A?dataset=gnomad_r3
chr2	217830423	rs189877000	C	T	0.008466	https://gnomad.broadinstitute.org/variant/2-217830423-C-T?dataset=gnomad_r3
chr2	227032260	rs10203363	C	T	0.4668	https://gnomad.broadinstitute.org/variant/2-227032260-C-T?dataset=gnomad_r3
chr2	238654938	rs907100	G	C	0.5391	https://gnomad.broadinstitute.org/variant/2-238654938-G-C?dataset=gnomad_r3
chr2	238654956	rs11689319	G	A	0.2261	https://gnomad.broadinstitute.org/variant/2-238654956-G-A?dataset=gnomad_r3
chr3	920099	rs1357617	A	T	0.7384	https://gnomad.broadinstitute.org/variant/3-920099-A-T?dataset=gnomad_r3
chr3	4362083	rs2819561	A	G	0.6141	https://gnomad.broadinstitute.org/variant/3-4362083-A-G?dataset=gnomad_r3
chr3	10844235	rs2304725	T	C	0.3269	https://gnomad.broadinstitute.org/variant/3-10844235-T-C?dataset=gnomad_r3
chr3	14714065	rs6765537	A	G	0.409	https://gnomad.broadinstitute.org/variant/3-14714065-A-G?dataset=gnomad_r3
chr3	14714110	rs6790129	C	G	0.4099	https://gnomad.broadinstitute.org/variant/3-14714110-C-G?dataset=gnomad_r3
chr3	101244310	rs571391	G	A	0.6463	https://gnomad.broadinstitute.org/variant/3-101244310-G-A?dataset=gnomad_r3
chr3	122540759	rs9851180	T	C	0.5268	https://gnomad.broadinstitute.org/variant/3-122540759-T-C?dataset=gnomad_r3
chr3	193466028	rs3796181	A	G	0.5071	https://gnomad.broadinstitute.org/variant/3-193466028-A-G?dataset=gnomad_r3
chr3	193491389	rs6788448	T	C	0.4395	https://gnomad.broadinstitute.org/variant/3-193491389-T-C?dataset=gnomad_r3
chr4	5748177	rs4688963	T	C	0.4118	https://gnomad.broadinstitute.org/variant/4-5748177-T-C?dataset=gnomad_r3
chr4	10967435	rs2046361	T	A	0.3865	https://gnomad.broadinstitute.org/variant/4-10967435-T-A?dataset=gnomad_r3
chr4	38774870	rs11096957	T	G	0.4174	https://gnomad.broadinstitute.org/variant/4-38774870-T-G?dataset=gnomad_r3
chr4	78522683	rs931605	A	T	0.1396	https://gnomad.broadinstitute.org/variant/4-78522683-A-T?dataset=gnomad_r3
chr4	78522696	rs931606	G	A	0.5214	https://gnomad.broadinstitute.org/variant/4-78522696-G-A?dataset=gnomad_r3
chr4	86769845	rs2230600	A	G	0.1447	https://gnomad.broadinstitute.org/variant/4-86769845-A-G?dataset=gnomad_r3
chr4	186201150	rs3817184	C	T	0.3565	https://gnomad.broadinstitute.org/variant/4-186201150-C-T?dataset=gnomad_r3
chr4	186201165	rs3736455	T	G	0.6193	https://gnomad.broadinstitute.org/variant/4-186201165-T-G?dataset=gnomad_r3
chr4	186201201	rs3736456	T	C	0.08531	https://gnomad.broadinstitute.org/variant/4-186201201-T-C?dataset=gnomad_r3
chr4	189396926	rs1979255	C	G	0.6398	https://gnomad.broadinstitute.org/variant/4-189396926-C-G?dataset=gnomad_r3
chr5	2879281	rs717302	G	A	0.5312	https://gnomad.broadinstitute.org/variant/5-2879281-G-A?dataset=gnomad_r3
chr5	73123790	rs636926	C	A	0.3503	https://gnomad.broadinstitute.org/variant/5-73123790-C-A?dataset=gnomad_r3
chr5	83538811	rs309557	T	C	0.5006	https://gnomad.broadinstitute.org/variant/5-83538811-T-C?dataset=gnomad_r3
chr5	96909735	rs1056893	C	T	0.5423	https://gnomad.broadinstitute.org/variant/5-96909735-C-T?dataset=gnomad_r3
chr5	151563524	rs2304054	G	A	0.4779	https://gnomad.broadinstitute.org/variant/5-151563524-G-A?dataset=gnomad_r3
chr5	170258159	rs315717	C	T	0.5345	https://gnomad.broadinstitute.org/variant/5-170258159-C-T?dataset=gnomad_r3
chr5	175351675	rs251934	A	G	0.3386	https://gnomad.broadinstitute.org/variant/5-175351675-A-G?dataset=gnomad_r3
chr6	96610677	rs2273621	A	G	0.3839	https://gnomad.broadinstitute.org/variant/6-96610677-A-G?dataset=gnomad_r3
chr6	96610691	rs2273622	A	G	0.1592	https://gnomad.broadinstitute.org/variant/6-96610691-A-G?dataset=gnomad_r3
chr6	96610698	rs2252816	G	A	0.3185	https://gnomad.broadinstitute.org/variant/6-96610698-G-A?dataset=gnomad_r3
chr6	146434004	rs2942	G	A	0.5041	https://gnomad.broadinstitute.org/variant/6-146434004-G-A?dataset=gnomad_r3
chr6	164624301	rs727811	G	T	0.4686	https://gnomad.broadinstitute.org/variant/6-164624301-G-T?dataset=gnomad_r3
chr7	4860464	rs1553960	A	G	0.4252	https://gnomad.broadinstitute.org/variant/7-4860464-A-G?dataset=gnomad_r3
chr7	48410560	rs17548783	T	C	0.4851	https://gnomad.broadinstitute.org/variant/7-48410560-T-C?dataset=gnomad_r3
chr7	51029277	rs2240090	C	T	0.6492	https://gnomad.broadinstitute.org/variant/7-51029277-C-T?dataset=gnomad_r3
chr7	156198119	rs737681	T	C	0.5952	https://gnomad.broadinstitute.org/variant/7-156198119-T-C?dataset=gnomad_r3
chr7	156969530	rs2302443	G	C	0.5111	https://gnomad.broadinstitute.org/variant/7-156969530-G-C?dataset=gnomad_r3
chr7	156969554	rs12919	G	A	0.5328	https://gnomad.broadinstitute.org/variant/7-156969554-G-A?dataset=gnomad_r3
chr8	1427444	rs763869	G	A	0.5217	https://gnomad.broadinstitute.org/variant/8-1427444-G-A?dataset=gnomad_r3
chr8	1565843	rs2301963	C	A	0.447	https://gnomad.broadinstitute.org/variant/8-1565843-C-A?dataset=gnomad_r3
chr8	33498556	rs6468171	A	G	0.6142	https://gnomad.broadinstitute.org/variant/8-33498556-A-G?dataset=gnomad_r3
chr8	93923709	rs4735258	T	C	0.4354	https://gnomad.broadinstitute.org/variant/8-93923709-T-C?dataset=gnomad_r3
chr8	120216440	rs4870723	A	C	0.5173	https://gnomad.broadinstitute.org/variant/8-120216440-A-C?dataset=gnomad_r3
chr8	123975238	rs7465584	T	C	0.4508	https://gnomad.broadinstitute.org/variant/8-123975238-T-C?dataset=gnomad_r3
chr9	4576680	rs301430	T	C	0.3814	https://gnomad.broadinstitute.org/variant/9-4576680-T-C?dataset=gnomad_r3
chr9	15784633	rs1539172	A	G	0.4955	https://gnomad.broadinstitute.org/variant/9-15784633-A-G?dataset=gnomad_r3
chr9	76706955	rs577993	C	T	0.5659	https://gnomad.broadinstitute.org/variant/9-76706955-C-T?dataset=gnomad_r3
chr9	97428498	rs1381532	A	G	0.5314	https://gnomad.broadinstitute.org/variant/9-97428498-A-G?dataset=gnomad_r3
chr9	101371346	rs1572983	C	T	0.6298	https://gnomad.broadinstitute.org/variant/9-101371346-C-T?dataset=gnomad_r3
chr9	122629090	rs1536929	A	G	0.658	https://gnomad.broadinstitute.org/variant/9-122629090-A-G?dataset=gnomad_r3
chr9	122629130	rs1536928	A	G	0.4642	https://gnomad.broadinstitute.org/variant/9-122629130-A-G?dataset=gnomad_r3
chr9	124119169	rs1463729	C	T	0.619	https://gnomad.broadinstitute.org/variant/9-124119169-C-T?dataset=gnomad_r3
chr9	124899366	rs634710	G	A	0.3823	https://gnomad.broadinstitute.org/variant/9-124899366-G-A?dataset=gnomad_r3
chr9	126205784	rs1360288	C	T	0.3046	https://gnomad.broadinstitute.org/variant/9-126205784-C-T?dataset=gnomad_r3
chr10	2364437	rs826472	T	C	0.7033	https://gnomad.broadinstitute.org/variant/10-2364437-T-C?dataset=gnomad_r3
chr10	3159873	rs4242746	T	C	0.6477	https://gnomad.broadinstitute.org/variant/10-3159873-T-C?dataset=gnomad_r3
chr10	34331292	rs3781128	C	T	0.5374	https://gnomad.broadinstitute.org/variant/10-34331292-C-T?dataset=gnomad_r3
chr10	98459557	rs10883099	G	A	0.5265	https://gnomad.broadinstitute.org/variant/10-98459557-G-A?dataset=gnomad_r3
chr10	122850511	rs1891110	G	A	0.5405	https://gnomad.broadinstitute.org/variant/10-122850511-G-A?dataset=gnomad_r3
chr10	130900156	rs964681	T	C	0.3748	https://gnomad.broadinstitute.org/variant/10-130900156-T-C?dataset=gnomad_r3
chr11	11074674	rs901398	C	T	0.6721	https://gnomad.broadinstitute.org/variant/11-11074674-C-T?dataset=gnomad_r3
chr11	16111867	rs4617548	A	G	0.5201	https://gnomad.broadinstitute.org/variant/11-16111867-A-G?dataset=gnomad_r3
chr11	74074281	rs4453265	T	C	0.4657	https://gnomad.broadinstitute.org/variant/11-74074281-T-C?dataset=gnomad_r3
chr11	134797630	rs7947725	C	T	0.08549	https://gnomad.broadinstitute.org/variant/11-134797630-C-T?dataset=gnomad_r3
chr11	134797652	rs2076848	A	T	0.3529	https://gnomad.broadinstitute.org/variant/11-134797652-A-T?dataset=gnomad_r3
chr12	884764	rs7300444	C	T	0.3992	https://gnomad.broadinstitute.org/variant/12-884764-C-T?dataset=gnomad_r3
chr12	10408358	rs2617170	T	C	0.6102	https://gnomad.broadinstitute.org/variant/12-10408358-T-C?dataset=gnomad_r3
chr13	20327585	rs1335873	T	A	0.578	https://gnomad.broadinstitute.org/variant/13-20327585-T-A?dataset=gnomad_r3
chr13	33129519	rs495680	T	C	0.5482	https://gnomad.broadinstitute.org/variant/13-33129519-T-C?dataset=gnomad_r3
chr13	38859469	rs9532292	A	G	0.3905	https://gnomad.broadinstitute.org/variant/13-38859469-A-G?dataset=gnomad_r3
chr13	106286062	rs354439	A	T	0.4633	https://gnomad.broadinstitute.org/variant/13-106286062-A-T?dataset=gnomad_r3
chr14	25381626	rs1454361	T	A	0.4259	https://gnomad.broadinstitute.org/variant/14-25381626-T-A?dataset=gnomad_r3
chr14	50302999	rs2297995	G	A	0.5779	https://gnomad.broadinstitute.org/variant/14-50302999-G-A?dataset=gnomad_r3
chr14	64170429	rs7161192	C	A	0.3354	https://gnomad.broadinstitute.org/variant/14-64170429-C-A?dataset=gnomad_r3
chr14	64564816	rs6573560	C	T	0.5902	https://gnomad.broadinstitute.org/variant/14-64564816-C-T?dataset=gnomad_r3
chr14	64564854	rs4902293	A	G	0.4381	https://gnomad.broadinstitute.org/variant/14-64564854-A-G?dataset=gnomad_r3
chr14	67575857	rs11158685	A	G	0.4831	https://gnomad.broadinstitute.org/variant/14-67575857-A-G?dataset=gnomad_r3
chr14	98379194	rs873196	C	T	0.6788	https://gnomad.broadinstitute.org/variant/14-98379194-C-T?dataset=gnomad_r3
chr15	34236747	rs4577050	G	A	0.611	https://gnomad.broadinstitute.org/variant/15-34236747-G-A?dataset=gnomad_r3
chr15	53324712	rs8037429	C	T	0.494	https://gnomad.broadinstitute.org/variant/15-53324712-C-T?dataset=gnomad_r3
chr15	54918507	rs1528460	C	T	0.5387	https://gnomad.broadinstitute.org/variant/15-54918507-C-T?dataset=gnomad_r3
chr16	5556196	rs729172	G	T	0.3405	https://gnomad.broadinstitute.org/variant/16-5556196-G-T?dataset=gnomad_r3
chr16	11385422	rs4343301	T	G	0.566	https://gnomad.broadinstitute.org/variant/16-11385422-T-G?dataset=gnomad_r3
chr16	11385448	rs4553648	C	T	0.4324	https://gnomad.broadinstitute.org/variant/16-11385448-C-T?dataset=gnomad_r3
chr16	70269677	rs2070203	G	A	0.4872	https://gnomad.broadinstitute.org/variant/16-70269677-G-A?dataset=gnomad_r3
chr16	80072464	rs1382387	C	A	0.621	https://gnomad.broadinstitute.org/variant/16-80072464-C-A?dataset=gnomad_r3
chr17	5803303	rs740910	A	G	0.2333	https://gnomad.broadinstitute.org/variant/17-5803303-A-G?dataset=gnomad_r3
chr17	14102122	rs2159132	G	A	0.5331	https://gnomad.broadinstitute.org/variant/17-14102122-G-A?dataset=gnomad_r3
chr17	18872554	rs80097258	C	T	0.0726	https://gnomad.broadinstitute.org/variant/17-18872554-C-T?dataset=gnomad_r3
chr17	18872587	rs4393623	A	G	0.5274	https://gnomad.broadinstitute.org/variant/17-18872587-A-G?dataset=gnomad_r3
chr17	59886176	rs1292053	A	G	0.4631	https://gnomad.broadinstitute.org/variant/17-59886176-A-G?dataset=gnomad_r3
chr17	73200670	rs1026128	A	G	0.5139	https://gnomad.broadinstitute.org/variant/17-73200670-A-G?dataset=gnomad_r3
chr17	73201609	rs1037256	G	A	0.5162	https://gnomad.broadinstitute.org/variant/17-73201609-G-A?dataset=gnomad_r3
chr18	1127985	rs1493232	C	A	0.6125	https://gnomad.broadinstitute.org/variant/18-1127985-C-A?dataset=gnomad_r3
chr18	23833905	rs9962023	T	C	0.6443	https://gnomad.broadinstitute.org/variant/18-23833905-T-C?dataset=gnomad_r3
chr18	50805154	rs2586776	G	A	0.4674	https://gnomad.broadinstitute.org/variant/18-50805154-G-A?dataset=gnomad_r3
chr18	50805183	rs2849233	T	C	0.3112	https://gnomad.broadinstitute.org/variant/18-50805183-T-C?dataset=gnomad_r3
chr18	62359938	rs6567272	C	T	0.5638	https://gnomad.broadinstitute.org/variant/18-62359938-C-T?dataset=gnomad_r3
chr18	62360008	rs1805034	C	T	0.5634	https://gnomad.broadinstitute.org/variant/18-62360008-C-T?dataset=gnomad_r3
chr18	63987229	rs3826616	A	G	0.5344	https://gnomad.broadinstitute.org/variant/18-63987229-A-G?dataset=gnomad_r3
chr18	77720430	rs1024116	C	T	0.4717	https://gnomad.broadinstitute.org/variant/18-77720430-C-T?dataset=gnomad_r3
chr19	7083618	rs966591	A	G	0.4327	https://gnomad.broadinstitute.org/variant/19-7083618-A-G?dataset=gnomad_r3
chr19	9380138	rs2217652	C	T	0.6096	https://gnomad.broadinstitute.org/variant/19-9380138-C-T?dataset=gnomad_r3
chr19	10156401	rs2228611	T	C	0.5103	https://gnomad.broadinstitute.org/variant/19-10156401-T-C?dataset=gnomad_r3
chr20	4466836	rs1031825	A	C	0.6253	https://gnomad.broadinstitute.org/variant/20-4466836-A-C?dataset=gnomad_r3
chr20	6119441	rs10373	A	G	0.5209	https://gnomad.broadinstitute.org/variant/20-6119441-A-G?dataset=gnomad_r3
chr20	40858416	rs116287324	T	C	0.04633	https://gnomad.broadinstitute.org/variant/20-40858416-T-C?dataset=gnomad_r3
chr20	40858470	rs1005533	G	A	0.524	https://gnomad.broadinstitute.org/variant/20-40858470-G-A?dataset=gnomad_r3
chr20	44938146	rs11780	A	G	0.4455	https://gnomad.broadinstitute.org/variant/20-44938146-A-G?dataset=gnomad_r3
chr20	54169680	rs2296241	G	A	0.5095	https://gnomad.broadinstitute.org/variant/20-54169680-G-A?dataset=gnomad_r3
chr21	14582207	rs2822785	G	A	0.3753	https://gnomad.broadinstitute.org/variant/21-14582207-G-A?dataset=gnomad_r3
chr21	14582272	rs2822786	G	A	0.2509	https://gnomad.broadinstitute.org/variant/21-14582272-G-A?dataset=gnomad_r3
chr21	28307368	rs2831700	A	G	0.3814	https://gnomad.broadinstitute.org/variant/21-28307368-A-G?dataset=gnomad_r3
chr21	41044003	rs914165	G	A	0.5021	https://gnomad.broadinstitute.org/variant/21-41044003-G-A?dataset=gnomad_r3
chr21	41044050	rs755095	C	G	0.05025	https://gnomad.broadinstitute.org/variant/21-41044050-C-G?dataset=gnomad_r3
chr21	42903480	rs4148973	T	G	0.6049	https://gnomad.broadinstitute.org/variant/21-42903480-T-G?dataset=gnomad_r3
chr22	20787012	rs4675	T	C	0.4873	https://gnomad.broadinstitute.org/variant/22-20787012-T-C?dataset=gnomad_r3
chr22	30557308	rs2267161	C	T	0.3243	https://gnomad.broadinstitute.org/variant/22-30557308-C-T?dataset=gnomad_r3
chr22	38782696	rs760482	A	G	0.3273	https://gnomad.broadinstitute.org/variant/22-38782696-A-G?dataset=gnomad_r3
chr22	47440662	rs2040411	G	A	0.6747	https://gnomad.broadinstitute.org/variant/22-47440662-G-A?dataset=gnomad_r3
chrX	15397461	rs8094	C	T	0.4931	https://gnomad.broadinstitute.org/variant/X-15397461-C-T?dataset=gnomad_r3
chrX	27821455	rs1368769	T	C	0.4913	https://gnomad.broadinstitute.org/variant/X-27821455-T-C?dataset=gnomad_r3
chrX	27821500	rs12557898	G	A	0.3734	https://gnomad.broadinstitute.org/variant/X-27821500-G-A?dataset=gnomad_r3
chrX	53632095	rs6638409	C	T	0.4081	https://gnomad.broadinstitute.org/variant/X-53632095-C-T?dataset=gnomad_r3
chrX	70030458	rs2296765	C	T	0.2995	https://gnomad.broadinstitute.org/variant/X-70030458-C-T?dataset=gnomad_r3
chrX	73838671	rs7888812	G	A	0.09292	https://gnomad.broadinstitute.org/variant/X-73838671-G-A?dataset=gnomad_r3
chrX	73838672	rs7891967	A	T	0.09259	https://gnomad.broadinstitute.org/variant/X-73838672-A-T?dataset=gnomad_r3
chrX	73842826	rs61741568	A	G	0.04374	https://gnomad.broadinstitute.org/variant/X-73842826-A-G?dataset=gnomad_r3
chrX	73842859	rs41310673	A	T	0.09333	https://gnomad.broadinstitute.org/variant/X-73842859-A-T?dataset=gnomad_r3
chrX	110451457	rs2073787	T	A	0.4811	https://gnomad.broadinstitute.org/variant/X-110451457-T-A?dataset=gnomad_r3
chrX	112454808	rs6568050	T	C	0.5319	https://gnomad.broadinstitute.org/variant/X-112454808-T-C?dataset=gnomad_r3
chrX	136349199	rs5930933	C	T	0.4882	https://gnomad.broadinstitute.org/variant/X-136349199-C-T?dataset=gnomad_r3
chrX	137031305	rs1190736	C	A	0.3399	https://gnomad.broadinstitute.org/variant/X-137031305-C-A?dataset=gnomad_r3
chrX	153558270	rs2269415	G	C	0.4315	https://gnomad.broadinstitute.org/variant/X-153558270-G-C?dataset=gnomad_r3
chrY	2786844	chrY-SRY_MIP-F62_start
chrY	2786864	chrY-SRY_MIP-F62_middle
chrY	2786884	chrY-SRY_MIP-F62_end
chrY	2786992	chrY-SRY_MIP-F63_start
chrY	2787012	chrY-SRY_MIP-F63_middle
chrY	2787032	chrY-SRY_MIP-F63_end
chrY	2787072	chrY-SRY_MIP-F64_start
chrY	2787092	chrY-SRY_MIP-F64_middle
chrY	2787112	chrY-SRY_MIP-F64_end
chrY	2787188	chrY-SRY_MIP-F65_start
chrY	2787208	chrY-SRY_MIP-F65_middle
chrY	2787228	chrY-SRY_MIP-F65_end
chrY	2787364	chrY-SRY_MIP-F66_start
chrY	2787384	chrY-SRY_MIP-F66_middle
chrY	2787404	chrY-SRY_MIP-F66_end
chrY	2787444	chrY-SRY_MIP-F67_start
chrY	2787464	chrY-SRY_MIP-F67_middle
chrY	2787484	chrY-SRY_MIP-F67_end
chrY	2787584	chrY-SRY_MIP-F173_start
chrY	2787604	chrY-SRY_MIP-F173_middle
chrY	2787624	chrY-SRY_MIP-F173_end
chrY	2787650	chrY-SRY_MIP-F69_start
chrY	2787670	chrY-SRY_MIP-F69_middle
chrY	2787690	chrY-SRY_MIP-F69_end
chrY	2787765	chrY-SRY_MIP-F70_start
chrY	2787785	chrY-SRY_MIP-F70_middle
chrY	2787805	chrY-SRY_MIP-F70_end
chrY	6865977	chrY-AMELY_MIP-F71_start
chrY	6865997	chrY-AMELY_MIP-F71_middle
chrY	6866017	chrY-AMELY_MIP-F71_end
chrY	6866102	chrY-AMELY_MIP-F72_start
chrY	6866122	chrY-AMELY_MIP-F72_middle
chrY	6866142	chrY-AMELY_MIP-F72_end
chrY	6866512	chrY-AMELY_MIP-F174_start
chrY	6866532	chrY-AMELY_MIP-F174_middle
chrY	6866552	chrY-AMELY_MIP-F174_end
chrY	6867522	chrY-AMELY_MIP-F74_start
chrY	6867542	chrY-AMELY_MIP-F74_middle
chrY	6867562	chrY-AMELY_MIP-F74_end
chrY	6868662	chrY-AMELY_MIP-F75_start
chrY	6868682	chrY-AMELY_MIP-F75_middle
chrY	6868702	chrY-AMELY_MIP-F75_end
chrY	6870223	chrY-AMELY_MIP-F76_start
chrY	6870243	chrY-AMELY_MIP-F76_middle
chrY	6870263	chrY-AMELY_MIP-F76_end
chrY	6870684	chrY-AMELY_MIP-F77_start
chrY	6870704	chrY-AMELY_MIP-F77_middle
chrY	6870724	chrY-AMELY_MIP-F77_end
chrY	6872292	chrY-AMELY_MIP-F78_start
chrY	6872312	chrY-AMELY_MIP-F78_middle
chrY	6872332	chrY-AMELY_MIP-F78_end
chrY	6872817	chrY-AMELY_MIP-F79_start
chrY	6872837	chrY-AMELY_MIP-F79_middle
chrY	6872857	chrY-AMELY_MIP-F79_end
chrY	6873214	chrY-AMELY_MIP-F80_start
chrY	6873234	chrY-AMELY_MIP-F80_middle
chrY	6873254	chrY-AMELY_MIP-F80_end

## Sheet: Supplementary Data 4B
Supplementary Data 4B. Sequence information of the single-molecule Molecular Inversion Probes (smMIP assay)
MIP probe ID	dbSNP ID(s) of target(s)	Probe sequence	Chr	MIP insert position start (GRCh38.p12)	MIP insert position end (GRCh38.p12)	Strand
MIP-F185	rs1490413	GTGTCTGGTTCAGGTGTGGANNNNNCTTCAGCTTCCCGATATCCGACGGTAGTGTNNNNNTTGTTTCTGACAGCTCAGAA	chr1	4307225	4307299	+
MIP-F186	rs1490413	CCACACCAGGCAGTTCTGAGNNNNNCTTCAGCTTCCCGATATCCGACGGTAGTGTNNNNNCTGAACCAGACACTTCTCAC	chr1	4307238	4307292	-
MIP-F01	rs3013105	GCATCTTTGTTGGGTGCGCANNNNNCTTCAGCTTCCCGATATCCGACGGTAGTGTNNNNNTCTTGGAGAGAGCTTCTGGT	chr1	13475807	13475876	+
MIP-F81	rs3013105	CTCCTGCCTCTTACTCTCCAGNNNNNCTTCAGCTTCCCGATATCCGACGGTAGTGTNNNNNTTCCTGGCCACTGTGGTGC	chr1	13475834	13475910	-
SNPexome-2	rs2229546	CCCTGGACGGTGCTCCCAGCNNNNNCTTCAGCTTCCCGATATCCGACGGTAGTGTNNNNNAGCAGACAACTGGTGGATCT	chr1	67395798	67395852	+
SNPexome-26	rs2229546	GCACCTTGTACAGATCCACCAGNNNNNCTTCAGCTTCCCGATATCCGACGGTAGTGTNNNNNTGGGAAGGTCACCTGCTG	chr1	67395809	67395868	-
MIP-F131	rs7514102	CCCAACCTGCTGTGCTCCAGGNNNNNCTTCAGCTTCCCGATATCCGACGGTAGTGTNNNNNCCCACCTACCTCCCTTTGG	chr1	110456204	110456276	+
MIP-F132	rs7514102	AGAAGAAATCAACACCTTCACCNNNNNCTTCAGCTTCCCGATATCCGACGGTAGTGTNNNNNCCGTCCGGGAACCTGGAG	chr1	110456224	110456290	-
MIP-F03	rs10754367	CCCTTTCCTTTGGCAGGCTTGNNNNNCTTCAGCTTCCCGATATCCGACGGTAGTGTNNNNNCTGACCAATGTAACGATTG	chr1	118101754	118101828	+
MIP-F83	rs10754367	AGAAGACGACCACACCAATCGNNNNNCTTCAGCTTCCCGATATCCGACGGTAGTGTNNNNNAAAGGCTCCAAGTGCCAAG	chr1	118101769	118101845	-
MIP-F04	rs843971	ATGCCCAGGGAAATGTTGTTGNNNNNCTTCAGCTTCCCGATATCCGACGGTAGTGTNNNNNTGACCCTTGGGAGTGGAGG	chr1	153304895	153304969	+
MIP-F84	rs843971	GCTGGAGAGTTGTGTACACTCNNNNNCTTCAGCTTCCCGATATCCGACGGTAGTGTNNNNNCAAGGCTTGCACACCCAGG	chr1	153304920	153304994	-
MIP-F05	rs7522061	AGAAAGATGAAGGCAGGGGAAGGNNNNNCTTCAGCTTCCCGATATCCGACGGTAGTGTNNNNNTGCTGCATATGAGAGCC	chr1	157698563	157698642	+
MIP-F85	rs7522061	GTCCACAGCCTTCAAAGGAGNNNNNCTTCAGCTTCCCGATATCCGACGGTAGTGTNNNNNTGTGCTGTGCCCACCTCCCA	chr1	157698590	157698669	-
MIP-F133	rs6679056	GTGGAGTTCTTGTACTTGTGNNNNNCTTCAGCTTCCCGATATCCGACGGTAGTGTNNNNNACAAAGTCAATCATTACTTC	chr1	158480472	158480541	+
MIP-F134	rs6679056	GAGATGTCACAGAAGTAATGNNNNNCTTCAGCTTCCCGATATCCGACGGTAGTGTNNNNNAGAAAGGGAACCACAAGTAC	chr1	158480483	158480552	-
SNPexome-25	rs1410592	TCAGGGACTCAGAAGCAGCCTNNNNNCTTCAGCTTCCCGATATCCGACGGTAGTGTNNNNNGTGGAAGGCTTCTCTGTGG	chr1	179551334	179551408	+
SNPexome-1	rs1410592	CCACACCCTTCAGTCTCTGTCNNNNNCTTCAGCTTCCCGATATCCGACGGTAGTGTNNNNNGCTGCTTCTGAGTCCCTGA	chr1	179551354	179551408	-
MIP-F136	rs2274064;rs17849501	GGTGGGATTGCTCAGCTTCCNNNNNCTTCAGCTTCCCGATATCCGACGGTAGTGTNNNNNAAGCTATATGAGCCAGTGGT	chr1	183573182	183573266	-
MIP-F135	rs2274064	ACACAGAAAACGTAGCATTCCNNNNNCTTCAGCTTCCCGATATCCGACGGTAGTGTNNNNNTCCTTCTTGGCCAGCTGAG	chr1	183573223	183573297	+
MIP-F137	rs7527925	CATTGGATTCCTACCAGAAGANNNNNCTTCAGCTTCCCGATATCCGACGGTAGTGTNNNNNACTTTGCTTCTCTTTTCGG	chr1	225346507	225346559	+
MIP-F138	rs7527925	GTGCAAAGCCGAAAAGAGAANNNNNCTTCAGCTTCCCGATATCCGACGGTAGTGTNNNNNGATGTTCCATTCTTCTTCTG	chr1	225346515	225346573	-
MIP-F187	rs10495407	GGCAATGTAAATTTGGGAGAACNNNNNCTTCAGCTTCCCGATATCCGACGGTAGTGTNNNNNTCTGGAGATCTCCACTTC	chr1	238275979	238276048	+
MIP-F188	rs10495407	CAACCAAGAGGAAGTGGAGATNNNNNCTTCAGCTTCCCGATATCCGACGGTAGTGTNNNNNGATGATAATTTCGTTCTCC	chr1	238275989	238276063	-
MIP-F181	rs891700	GAGTGTCATAGCTCACACATANNNNNCTTCAGCTTCCCGATATCCGACGGTAGTGTNNNNNTCAGAGGTGGTATTTCTAG	chr1	239718568	239718642	+
MIP-F182	rs891700	TAACACTCAGCTAGAAATACCANNNNNCTTCAGCTTCCCGATATCCGACGGTAGTGTNNNNNAGCTATGACACTCCTTAG	chr1	239718578	239718637	-
MIP-F183	rs1413212;rs6669024	TCCACCACTGTCAGTGTTTCNNNNNCTTCAGCTTCCCGATATCCGACGGTAGTGTNNNNNGCTAACAGGCCTTTGTTATT	chr1	242643438	242643502	+
MIP-F184	rs1413212	GTCTCCTGGATAATGGAATGTNNNNNCTTCAGCTTCCCGATATCCGACGGTAGTGTNNNNNCACTCTTCTGAATCCTGGT	chr1	242643473	242643537	-
MIP-F06	rs3811445	GCAGGGTCAGGAAATTGGGCNNNNNCTTCAGCTTCCCGATATCCGACGGTAGTGTNNNNNACCAACTCTTCTCTGGTCTT	chr1	247876358	247876417	+
MIP-F86	rs3811445	AAGGCCGAAGAAGACCAGAGNNNNNCTTCAGCTTCCCGATATCCGACGGTAGTGTNNNNNTCAGAAGCAGGATCTAAATG	chr1	247876368	247876447	-
MIP-F189	rs876724	CAAACTCTTTCCCAGGGTAGCNNNNNCTTCAGCTTCCCGATATCCGACGGTAGTGTNNNNNTCTATGAGCAGGCAGTTAG	chr2	114918	114992	-
MIP-F190	rs876724	GCCTGCTCATAGATATTCAAATNNNNNCTTCAGCTTCCCGATATCCGACGGTAGTGTNNNNNGGAAAGAGTTTGGCAGGG	chr2	114924	114998	+
MIP-F139	rs3731631	GGACAAGTGCTCTCGACAGGANNNNNCTTCAGCTTCCCGATATCCGACGGTAGTGTNNNNNATGCAAGGGCTAAGGAGGC	chr2	25136504	25136558	+
MIP-F140	rs3731631	GGGATGCAAAGGGCCTCCTTNNNNNCTTCAGCTTCCCGATATCCGACGGTAGTGTNNNNNTTCATGAAGACGGTGTCCTG	chr2	25136516	25136574	-
MIP-F07	rs935172	CCCGTGAGCCATGTGAGCCCGCANNNNNCTTCAGCTTCCCGATATCCGACGGTAGTGTNNNNNTCGATTCCTGTGGTCTC	chr2	26581328	26581407	+
MIP-F87	rs935172	TGACATGGCAGCCTCGAGGGAGNNNNNCTTCAGCTTCCCGATATCCGACGGTAGTGTNNNNNCCTTGGACCTGCGGGCTC	chr2	26581347	26581421	-
MIP-F88	rs3739014	CCTCGCCGAAAGGACGTTCAGNNNNNCTTCAGCTTCCCGATATCCGACGGTAGTGTNNNNNGCCGGCCCTATGCTGAGCA	chr2	101022361	101022438	-
MIP-F08	rs3739014	GGGCCGGCTGGGGTCGTGGCGTNNNNNCTTCAGCTTCCCGATATCCGACGGTAGTGTNNNNNCGCAGGTCCAGGGCGAGA	chr2	101022395	101022449	+
SNPexome-4	rs10203363	CCCTGTAACCAGACAGACACANNNNNCTTCAGCTTCCCGATATCCGACGGTAGTGTNNNNNAAGCGTGCAGCTGATATTT	chr2	168932457	168932531	+
SNPexome-27	rs497692	AAGCTAAAATATCAGCTGCACGNNNNNCTTCAGCTTCCCGATATCCGACGGTAGTGTNNNNNAGGGTGATCTCTGCAGTT	chr2	168932463	168932517	-
MIP-F10	rs1862066	GTGATGAGGTTTCAGTTTCAGCNNNNNCTTCAGCTTCCCGATATCCGACGGTAGTGTNNNNNATAAACAGTAATGGAGAA	chr2	185807136	185807205	+
MIP-F90	rs1862066	CACTAGTTAGTCTTCTTGCTANNNNNCTTCAGCTTCCCGATATCCGACGGTAGTGTNNNNNATTCCAGAGGCAAACATGC	chr2	185807161	185807225	-
MIP-F141	rs4853575;rs4853574	CCAGAGAAAGTGGAAGAATACANNNNNCTTCAGCTTCCCGATATCCGACGGTAGTGTNNNNNCTAATGGGCATGTTTTGT	chr2	191296097	191296170	+
MIP-F142	rs4853575	GGGTTAACAGATATAACCACACNNNNNCTTCAGCTTCCCGATATCCGACGGTAGTGTNNNNNTTACATGTGAGGGCTCAG	chr2	191296146	191296212	-
MIP-F143	rs3796028;rs189877000	CCCAGCCCTAAAACCAGAGTCNNNNNCTTCAGCTTCCCGATATCCGACGGTAGTGTNNNNNGCGTGGCTTCATGGGTCAC	chr2	217830343	217830427	+
MIP-F144	rs3796028;rs189877000	GGCAGTGGCATGCATTTGTGNNNNNCTTCAGCTTCCCGATATCCGACGGTAGTGTNNNNNAGCTGCTCCCTGGACTCTGG	chr2	217830360	217830440	-
SNPexome-3	rs497692	TCTTGTCCCTGTTATAGTGCNNNNNCTTCAGCTTCCCGATATCCGACGGTAGTGTNNNNNTTTTAGCCCAGGTATTCCCA	chr2	227032247	227032316	+
SNPexome-28	rs10203363	GTGGGAATACCTGGGCTAAANNNNNCTTCAGCTTCCCGATATCCGACGGTAGTGTNNNNNTTTCAGGCACTATAACAGGG	chr2	227032248	227032322	-
MIP-F191	rs907100	GAATCGTTATCAGGAACTCCCNNNNNCTTCAGCTTCCCGATATCCGACGGTAGTGTNNNNNTTCCTTTCCAAGCCTTGGA	chr2	238654899	238654973	-
MIP-F192	rs907100	CCAAGGCTTGGAAAGGAATCANNNNNCTTCAGCTTCCCGATATCCGACGGTAGTGTNNNNNCTGATAACGATTCTGAAGG	chr2	238654905	238654974	+
MIP-F193	rs1357617;rs11689319	AATTCAGCTTGGGAAGTCAAATNNNNNCTTCAGCTTCCCGATATCCGACGGTAGTGTNNNNNGGTTATCAACAAGATGAG	chr3	920040	920104	+
MIP-F194	rs1357617;rs11689319	GGGCTTTTCAATTCTCATCTTGNNNNNCTTCAGCTTCCCGATATCCGACGGTAGTGTNNNNNGACCACTTCACCCTCTGT	chr3	920053	920132	-
SNPexome-5	rs2819561	ACGACTGCTCCTTGGACTGGGNNNNNCTTCAGCTTCCCGATATCCGACGGTAGTGTNNNNNTTCCTTTGGCCATTGGGCA	chr3	4362025	4362104	+
SNPexome-29	rs2819561	ACCTGCCCAATGGCCAAAGGAANNNNNCTTCAGCTTCCCGATATCCGACGGTAGTGTNNNNNCCCAGTCCAAGGAGCAGT	chr3	4362028	4362107	-
MIP-F91	rs2304725	GCCTGGACCATCTGTTACTTCNNNNNCTTCAGCTTCCCGATATCCGACGGTAGTGTNNNNNCTCCACCCTCCCTTCTGCA	chr3	10844213	10844292	+
MIP-F11	rs2304725	TGGCCAGGACCCGGTGCCTGCANNNNNCTTCAGCTTCCCGATATCCGACGGTAGTGTNNNNNCCCCTTCCAGATACAGAA	chr3	10844231	10844310	-
MIP-F12	rs6765537	ACCTGGATTCTCCTTGCTGGNNNNNCTTCAGCTTCCCGATATCCGACGGTAGTGTNNNNNAACATTTCTGCCAGCTATCC	chr3	14714013	14714087	+
MIP-F92	rs6765537	CTGACATACAGCGACGTTTCCNNNNNCTTCAGCTTCCCGATATCCGACGGTAGTGTNNNNNAGCCCTGGCCTTCAGTATT	chr3	14714038	14714115	-
MIP-F93	rs571391	GTGCTTACTAATTTGGTCTGTNNNNNCTTCAGCTTCCCGATATCCGACGGTAGTGTNNNNNGATTCAGCTGCAGTATCTG	chr3	101244260	101244338	+
MIP-F13	rs571391	GCCCATCTTCGCAGATACTGNNNNNCTTCAGCTTCCCGATATCCGACGGTAGTGTNNNNNAAATGGATTCCACAGACCAA	chr3	101244271	101244350	-
MIP-F145	rs9851180;rs28365795	GGAGATCTAGCTTCAAGCCCANNNNNCTTCAGCTTCCCGATATCCGACGGTAGTGTNNNNNTTCTCAATGATGTGGTGGT	chr3	122540718	122540797	+
MIP-F146	rs9851180;rs28365795	TCCTGAGTCTCCAGAACCACCNNNNNCTTCAGCTTCCCGATATCCGACGGTAGTGTNNNNNGGCTTGAAGCTAGATCTCC	chr3	122540733	122540797	-
MIP-F147	rs3796181	GATCATCCCAATGGTGGCTGTNNNNNCTTCAGCTTCCCGATATCCGACGGTAGTGTNNNNNCCAACATGCACAGTACAAA	chr3	193465973	193466054	+
MIP-F148	rs3796181	GCTGTCTTTGCTCTTTTATTAANNNNNCTTCAGCTTCCCGATATCCGACGGTAGTGTNNNNNCCTCCTGTGCCTTGTAGG	chr3	193466021	193466076	-
MIP-F149	rs6788448	ATCACAGATCACTCTGTCACNNNNNCTTCAGCTTCCCGATATCCGACGGTAGTGTNNNNNCTGGAGAAATTACCTCCTTG	chr3	193491336	193491410	+
MIP-F150	rs6788448	GTTGAAGTTACACCAATTTGGNNNNNCTTCAGCTTCCCGATATCCGACGGTAGTGTNNNNNAATAGGTGAGGAGTCAGTT	chr3	193491368	193491445	-
SNPexome-6	rs4688963	ACAAGCAGCAAGAAGTGAGGTGNNNNNCTTCAGCTTCCCGATATCCGACGGTAGTGTNNNNNGCTGTCGGGCTTTGGAGC	chr4	5748135	5748214	-
SNPexome-30	rs4688963	AGCTCCAAAGCCCGACAGCTNNNNNCTTCAGCTTCCCGATATCCGACGGTAGTGTNNNNNATTTCACAGATGGAAGCTTT	chr4	5748159	5748213	+
MIP-F197	rs2046361	GGAAAAGTCTTAAAGGTAAGGANNNNNCTTCAGCTTCCCGATATCCGACGGTAGTGTNNNNNGGTCATTGTTGACACTTC	chr4	10967427	10967486	+
MIP-F198	rs2046361	GAAGGTGAAGTGTCAACAATGNNNNNCTTCAGCTTCCCGATATCCGACGGTAGTGTNNNNNGTATCCTTACCTTTAAGAC	chr4	10967433	10967492	-
MIP-F94	rs11096957	CGGTTCTATTGCTTAATAAAGTNNNNNCTTCAGCTTCCCGATATCCGACGGTAGTGTNNNNNTATAGATGGCAAAAGCCA	chr4	38774858	38774910	-
MIP-F14	rs11096957	GAAGTCTTGATTCCATCACGCANNNNNCTTCAGCTTCCCGATATCCGACGGTAGTGTNNNNNGAACCGATGTCTTAGCAT	chr4	38774870	38774949	+
MIP-F15	rs931606	TCCAGACCACCTAGGAGGAATTGNNNNNCTTCAGCTTCCCGATATCCGACGGTAGTGTNNNNNGTTTCCCCTTCAAATAG	chr4	78522649	78522703	+
MIP-F95	rs931606	GCTCCATCACAAACTGTCCTANNNNNCTTCAGCTTCCCGATATCCGACGGTAGTGTNNNNNCAAAAGTCTGAGCGCTCCA	chr4	78522667	78522746	-
MIP-F151	rs2230600	GCTCTTTCCTGGACAGCCAGCNNNNNCTTCAGCTTCCCGATATCCGACGGTAGTGTNNNNNGCTCAGGTCTAGGATTCAG	chr4	86769821	86769883	+
MIP-F152	rs2230600	ACTGAATCCTAGACCTGAGCTNNNNNCTTCAGCTTCCCGATATCCGACGGTAGTGTNNNNNTCCACTTTCTGCTGCTGGC	chr4	86769822	86769898	-
MIP-F16	rs3736455	GCAGGGGCTCTGCCCCCTCCAANNNNNCTTCAGCTTCCCGATATCCGACGGTAGTGTNNNNNCAAGTCCAAACAGAAGCA	chr4	186201132	186201211	+
MIP-F96	rs3736455	GCGATGACCTGTATGATTTGNNNNNCTTCAGCTTCCCGATATCCGACGGTAGTGTNNNNNAAGCAAGTCAAGAAAGGCCC	chr4	186201165	186201244	-
MIP-F195	rs1979255	CATCCATAGTCTCTGAACTGGNNNNNCTTCAGCTTCCCGATATCCGACGGTAGTGTNNNNNTAGCTTGTGTTGGTCAGGG	chr4	189396903	189396972	+
MIP-F196	rs1979255	AGAGTTCCAACGTTCCATGCCNNNNNCTTCAGCTTCCCGATATCCGACGGTAGTGTNNNNNTACCAGTTCAGAGACTATG	chr4	189396922	189396976	-
MIP-F201	rs717302	ACCTCTTTCTGTGTTTGGACANNNNNCTTCAGCTTCCCGATATCCGACGGTAGTGTNNNNNAAGGATATGGCAAATAAGC	chr5	2879252	2879321	+
MIP-F202	rs717302	CTAAAGCTTATTTGCCATATCCNNNNNCTTCAGCTTCCCGATATCCGACGGTAGTGTNNNNNCACAGAAAGAGGTTCATA	chr5	2879257	2879316	-
MIP-F154	rs636926	GCTGATGAGCATGCCGCTTGTNNNNNCTTCAGCTTCCCGATATCCGACGGTAGTGTNNNNNCTGAGTCGCCAGTGTCTGT	chr5	73123755	73123814	-
MIP-F153	rs636926	CTGCAGATCATGGGGCCCTTGNNNNNCTTCAGCTTCCCGATATCCGACGGTAGTGTNNNNNGGGTCCCTGGATGTGGCTC	chr5	73123787	73123859	+
SNPexome-7	rs309557	CAACAGTGTCTCATCCCATAGNNNNNCTTCAGCTTCCCGATATCCGACGGTAGTGTNNNNNCGATTAGGAGAACCAAATT	chr5	83538753	83538827	+
SNPexome-31	rs309557	ACCTGTGGAAAAGCCCCTTANNNNNCTTCAGCTTCCCGATATCCGACGGTAGTGTNNNNNCTCCAGAGCCTTCCATCATT	chr5	83538785	83538864	-
MIP-F97	rs1056893	GTAGATGTAGACTTCTGTCCTNNNNNCTTCAGCTTCCCGATATCCGACGGTAGTGTNNNNNCGGCTCTCTTGAAGCTGGC	chr5	96909684	96909764	+
MIP-F17	rs1056893	TCAGGTCACAGGCCAGCTTCNNNNNCTTCAGCTTCCCGATATCCGACGGTAGTGTNNNNNACAAAGGGTAGGACAGAAGT	chr5	96909695	96909774	-
MIP-F98	rs2304054	GGGCACAGAACCCCTGTCCACNNNNNCTTCAGCTTCCCGATATCCGACGGTAGTGTNNNNNATCCTCCTGGATGGAGGGG	chr5	151563471	151563550	+
MIP-F18	rs2304054	CCCAGATGTCCCAAGCTGTGNNNNNCTTCAGCTTCCCGATATCCGACGGTAGTGTNNNNNCTGGTTGACGGTATTAGCAG	chr5	151563496	151563570	-
MIP-F19	rs315717	ATGAATGAGATTGGCAGGCCCCAGNNNNNCTTCAGCTTCCCGATATCCGACGGTAGTGTNNNNNGGCTTAGTAGATCTTG	chr5	170258107	170258186	+
MIP-F99	rs315717	CCTTTGCCCCAGCCAGCACTANNNNNCTTCAGCTTCCCGATATCCGACGGTAGTGTNNNNNCTAGCTGTTTCTAACTGGG	chr5	170258156	170258240	-
MIP-F199	rs251934	TGCCCTCTAATTACTTCAGGCNNNNNCTTCAGCTTCCCGATATCCGACGGTAGTGTNNNNNCTCTTGCTAGAATCCAGAC	chr5	175351619	175351693	+
MIP-F200	rs251934	GATATCTACTACTTCATCTGCCNNNNNCTTCAGCTTCCCGATATCCGACGGTAGTGTNNNNNCCCAGAGGGTGGGCAAAG	chr5	175351665	175351724	-
MIP-F20	rs2273621	CCACTACACAGAAAACACTCTNNNNNCTTCAGCTTCCCGATATCCGACGGTAGTGTNNNNNGCTACACACTTGTTGGCAT	chr6	96610640	96610719	-
MIP-F100	rs2273621	GAACTGTTCTTCACAGAGATCNNNNNCTTCAGCTTCCCGATATCCGACGGTAGTGTNNNNNCCACTAATGGGTTTGGAAC	chr6	96610671	96610740	-
SNPexome-8	rs2942	CTCTGGCAAGAGCCTGACCTTTNNNNNCTTCAGCTTCCCGATATCCGACGGTAGTGTNNNNNCGCCTCTCTGTGCACGTG	chr6	146433963	146434027	+
SNPexome-32	rs2942	TTGCAGGCCGTCTCATTGGTCNNNNNCTTCAGCTTCCCGATATCCGACGGTAGTGTNNNNNGTCTTGGTGCTGGTATCTG	chr6	146433986	146434050	-
MIP-F203	rs727811	GTCGTTGAAGTTCCGGTAAGNNNNNCTTCAGCTTCCCGATATCCGACGGTAGTGTNNNNNACTTAATATTTCATGCCCAC	chr6	164624245	164624304	+
MIP-F204	rs727811	GCTCTGTGGGCATGAAATATTANNNNNCTTCAGCTTCCCGATATCCGACGGTAGTGTNNNNNTACCGGAACTTCAACGAC	chr6	164624250	164624304	-
MIP-F101	rs1553960	GCCCTAACCCAATCACCCANNNNNCTTCAGCTTCCCGATATCCGACGGTAGTGTNNNNNTTCACTGCTTGCCTATAAACA	chr7	4860411	4860480	+
MIP-F21	rs1553960	CTATGATATCCAGTCTTTCACAGNNNNNCTTCAGCTTCCCGATATCCGACGGTAGTGTNNNNNTCGTACAATGTGGGTGA	chr7	4860438	4860492	-
SNPexome-9	rs17548783	CCAGCATGGGAGGCTCAGGTGNNNNNCTTCAGCTTCCCGATATCCGACGGTAGTGTNNNNNTGGACCCAGGTCGTACGAT	chr7	48410530	48410589	+
SNPexome-33	rs17548783	GGTGGTGGGTTGTGAAGATGATNNNNNCTTCAGCTTCCCGATATCCGACGGTAGTGTNNNNNCAGGCAGAAGGGAGGACC	chr7	48410550	48410614	-
MIP-F102	rs2240090	GGGCAGGTACTTCCTCCCTTGNNNNNCTTCAGCTTCCCGATATCCGACGGTAGTGTNNNNNAAAGAAGTCACCCTGGGCG	chr7	51029214	51029297	+
MIP-F22	rs2240090	GGAATCCGTGTGGCCTTATCTNNNNNCTTCAGCTTCCCGATATCCGACGGTAGTGTNNNNNAGCACAGCCAGCCCCATGA	chr7	51029269	51029323	-
MIP-F205	rs737681	AGATGGCCTCACATGTGACCNNNNNCTTCAGCTTCCCGATATCCGACGGTAGTGTNNNNNATGTAGGCACTGTTCCAGGG	chr7	156198114	156198173	-
MIP-F206	rs737681	CCCTGGAACAGTGCCTACATCNNNNNCTTCAGCTTCCCGATATCCGACGGTAGTGTNNNNNGTCACATGTGAGGCCATCT	chr7	156198114	156198173	+
MIP-F23	rs12919	GCCACTTCTTGCTAAAGAACGCNNNNNCTTCAGCTTCCCGATATCCGACGGTAGTGTNNNNNGCCAGCTCAGCCCTGACA	chr7	156969505	156969584	+
MIP-F103	rs12919	TCGTATAAACACATGTCAGGGNNNNNCTTCAGCTTCCCGATATCCGACGGTAGTGTNNNNNCTGTGGGCCTGTGCGTTCT	chr7	156969518	156969599	-
MIP-F207	rs763869	AATGTCAACAGAAAGCACTTGANNNNNCTTCAGCTTCCCGATATCCGACGGTAGTGTNNNNNTGATGTGGCTACTCCCTC	chr8	1427431	1427495	+
MIP-F208	rs763869	ACATTATGAGGGAGTAGCCACNNNNNCTTCAGCTTCCCGATATCCGACGGTAGTGTNNNNNCAAGTGCTTTCTGTTGACA	chr8	1427438	1427497	-
MIP-F104	rs2301963	GCCGCTGCTGAAGTCCATCGGNNNNNCTTCAGCTTCCCGATATCCGACGGTAGTGTNNNNNATGAGAAGTGGGAGTTACA	chr8	1565768	1565846	+
MIP-F24	rs2301963	AGCACCAGACGTAAGTGAGACNNNNNCTTCAGCTTCCCGATATCCGACGGTAGTGTNNNNNAGAGTCAGACTCCAGCCCC	chr8	1565815	1565884	+
MIP-F155	rs6468171	AATACGAGCAGGAGACAGAGCNNNNNCTTCAGCTTCCCGATATCCGACGGTAGTGTNNNNNAAGGCCCTTAGTGCGAAAC	chr8	33498523	33498582	+
MIP-F156	rs6468171	GTGTTTCGCACTAAGGGCCTTNNNNNCTTCAGCTTCCCGATATCCGACGGTAGTGTNNNNNTTGGCCACGGGCTCTGTCT	chr8	33498525	33498594	-
SNPexome-10	rs4735258	TTCCAGTTGGTCATTCTAAGCNNNNNCTTCAGCTTCCCGATATCCGACGGTAGTGTNNNNNGTGAGTGGCTCTTTCACTG	chr8	93923692	93923756	+
SNPexome-34	rs4735258	GAATTGCCAGTGAAAGAGCCANNNNNCTTCAGCTTCCCGATATCCGACGGTAGTGTNNNNNGCTTAGAATGACCAACTGG	chr8	93923699	93923758	-
MIP-F105	rs4870723	GCAGATGGGACTGAAATCAATNNNNNCTTCAGCTTCCCGATATCCGACGGTAGTGTNNNNNCCTGAGAATCTCCAATGTT	chr8	120216392	120216466	+
MIP-F25	rs4870723	ACTGTTAGAGCCAACATTGGAGNNNNNCTTCAGCTTCCCGATATCCGACGGTAGTGTNNNNNCCGGAACTTACCTCATTG	chr8	120216404	120216483	-
MIP-F26	rs7465584	GGTGATGTCTTGAAGACCAGCNNNNNCTTCAGCTTCCCGATATCCGACGGTAGTGTNNNNNAAGTGGGCCCTGCTCACAG	chr8	123975186	123975250	+
MIP-F106	rs7465584	CCAGGGTCTGTGAGCAGGGCCNNNNNCTTCAGCTTCCCGATATCCGACGGTAGTGTNNNNNGGCTCCTCGGTGTCAGAAG	chr8	123975193	123975278	-
MIP-F157	rs301430	CAGCGGTGTTTATTGCACAGTNNNNNCTTCAGCTTCCCGATATCCGACGGTAGTGTNNNNNTAACCAGGTGGACAAGAGG	chr9	4576630	4576699	+
MIP-F158	rs301430	TCGAGTGATCCTCTTGTCCACNNNNNCTTCAGCTTCCCGATATCCGACGGTAGTGTNNNNNCCAGGTCATTCAACTGTGC	chr9	4576639	4576713	-
MIP-F107	rs1539172	CACTCCAGTGAGGAAGCTGACNNNNNCTTCAGCTTCCCGATATCCGACGGTAGTGTNNNNNTACTTCGGGAAGAGCAGGC	chr9	15784583	15784643	+
MIP-F27	rs1539172	CATTCAATAGCATTTGTGCCTGCNNNNNCTTCAGCTTCCCGATATCCGACGGTAGTGTNNNNNACCTTAACAGCTTCTCC	chr9	15784600	15784679	-
MIP-F159	rs577993	GGATCAGGGCTGCTTTGTTGANNNNNCTTCAGCTTCCCGATATCCGACGGTAGTGTNNNNNACATCTCCTGTTGTCCCTG	chr9	76706900	76706976	+
MIP-F160	rs577993	CTTCTCCAGAAACAGGGACAANNNNNCTTCAGCTTCCCGATATCCGACGGTAGTGTNNNNNCATTCTGTGACAATCAACA	chr9	76706912	76706991	-
SNPexome-35	rs1381532	GCCTATAAGAACACAGTAGAAGNNNNNCTTCAGCTTCCCGATATCCGACGGTAGTGTNNNNNTGTACTCTCCTTGGAGCC	chr9	97428462	97428541	-
SNPexome-11	rs1381532	CCCGGCTCCAAGGAGAGTACNNNNNCTTCAGCTTCCCGATATCCGACGGTAGTGTNNNNNTTATAGGCAAAGATGCTGGA	chr9	97428474	97428538	+
MIP-F161	rs1572983	GATATGCACTGGCTCATCAACNNNNNCTTCAGCTTCCCGATATCCGACGGTAGTGTNNNNNAACATGTCTCCGTTTTCAT	chr9	101371293	101371347	+
MIP-F162	rs1572983	CAGGCATCACTGGAAGATGAANNNNNCTTCAGCTTCCCGATATCCGACGGTAGTGTNNNNNGCTACCCCTGTGAGTGCAC	chr9	101371309	101371370	-
MIP-F28	rs1536928	GGGGGTCACAGATGGCCACANNNNNCTTCAGCTTCCCGATATCCGACGGTAGTGTNNNNNAACATGGTGTGCAGTATGGA	chr9	122629077	122629141	+
MIP-F108	rs1536928	GCTGGGTGGTGTCCATACTGCNNNNNCTTCAGCTTCCCGATATCCGACGGTAGTGTNNNNNCTGTCATGGCTCTGGATCG	chr9	122629088	122629164	-
MIP-F211	rs1463729	ACATGTGAAACACACGAGACAANNNNNCTTCAGCTTCCCGATATCCGACGGTAGTGTNNNNNGCCTGTACCTGCAACTAT	chr9	124119142	124119216	-
MIP-F212	rs1463729	ATAGTTGCAGGTACAGGCGGNNNNNCTTCAGCTTCCCGATATCCGACGGTAGTGTNNNNNGTCTCGTGTGTTTCACATGT	chr9	124119142	124119216	+
MIP-F29	rs634710	AGCTAAGAGAGGGTGGGCCCAGGNNNNNCTTCAGCTTCCCGATATCCGACGGTAGTGTNNNNNAGAAGCCCAGATAGTGG	chr9	124899319	124899378	-
MIP-F109	rs634710	GCTGCTCCAGAGCAAGGGCCTNNNNNCTTCAGCTTCCCGATATCCGACGGTAGTGTNNNNNGCGGTGGTCTGGTCAGCTG	chr9	124899361	124899420	+
MIP-F209	rs1360288	CCTCCAGACCTGAAAGATGGANNNNNCTTCAGCTTCCCGATATCCGACGGTAGTGTNNNNNCTCTGTGTGTGGCTTTGGG	chr9	126205738	126205812	+
MIP-F210	rs1360288	CCAGAGGCTGCAGGGAGCCTNNNNNCTTCAGCTTCCCGATATCCGACGGTAGTGTNNNNNTGCTACTCTTCAAAGCCTCC	chr9	126205761	126205830	-
MIP-F213	rs826472	AGGATAGCAGATTAATTAGTCTNNNNNCTTCAGCTTCCCGATATCCGACGGTAGTGTNNNNNGTAGCATTTTTATGCATC	chr10	2364359	2364438	+
MIP-F214	rs826472	GAGATAGGTGACTAATATAACANNNNNCTTCAGCTTCCCGATATCCGACGGTAGTGTNNNNNCCCAGCAAAAACTTCTTT	chr10	2364434	2364508	-
MIP-F110	rs4242746	TCCGGGCCACATGTTATCTGNNNNNCTTCAGCTTCCCGATATCCGACGGTAGTGTNNNNNCTTGTATGAGCTTTGACAGC	chr10	3159838	3159907	+
MIP-F30	rs4242746	CCTCTTACCGGAGTAAGTATATGCNNNNNCTTCAGCTTCCCGATATCCGACGGTAGTGTNNNNNACAGAGGGAATTCCAG	chr10	3159860	3159924	-
MIP-F31	rs3781128	GACCCAGGGAAGGACCCACANNNNNCTTCAGCTTCCCGATATCCGACGGTAGTGTNNNNNGCGGCCGTGGACGATGGAAA	chr10	34331239	34331308	+
MIP-F111	rs3781128	GAGGTGACTTTGAATGGGGATNNNNNCTTCAGCTTCCCGATATCCGACGGTAGTGTNNNNNTCTCCCAGCAGAGATGTGG	chr10	34331265	34331323	-
SNPexome-12	rs10883099	GCCTGCTGGGCTGCTTCCACTNNNNNCTTCAGCTTCCCGATATCCGACGGTAGTGTNNNNNCATCCCTCCAGTCACCATG	chr10	98459545	98459624	-
SNPexome-36	rs10883099	CCATGGTGACTGGAGGGATGACNNNNNCTTCAGCTTCCCGATATCCGACGGTAGTGTNNNNNCCAGCAGGCCCACTGGTA	chr10	98459554	98459623	+
MIP-F112	rs1891110	ACTGTATGGAGGTCAAAAGACTNNNNNCTTCAGCTTCCCGATATCCGACGGTAGTGTNNNNNGAAGTAAAGACAGAGCAC	chr10	122850462	122850519	+
MIP-F32	rs1891110	GATAGTTGTCGTGCTCTGTCNNNNNCTTCAGCTTCCCGATATCCGACGGTAGTGTNNNNNTGCTTGCACTTATCTGCCTA	chr10	122850472	122850551	-
MIP-F215	rs964681	GTGCTCAGACAGCAACCTCTGGNNNNNCTTCAGCTTCCCGATATCCGACGGTAGTGTNNNNNGAGGTGAGCTGGCTGCGT	chr10	130900099	130900173	+
MIP-F216	rs964681	CACCTCCAGGTACCTTCCTGANNNNNCTTCAGCTTCCCGATATCCGACGGTAGTGTNNNNNTGGAGGATTGGTAAGAACC	chr10	130900134	130900193	-
MIP-F217	rs901398	GTACATTCCAGATGCCCAGCNNNNNCTTCAGCTTCCCGATATCCGACGGTAGTGTNNNNNTTTGACAACTACTATGTCAG	chr11	11074644	11074703	+
MIP-F218	rs901398	CCCAGACTGACATAGTAGTTGNNNNNCTTCAGCTTCCCGATATCCGACGGTAGTGTNNNNNGACTCAAGGAGCTTAGCTG	chr11	11074650	11074719	-
SNPexome-13	rs4617548	CGGAGGCATGTGACCCTGAACNNNNNCTTCAGCTTCCCGATATCCGACGGTAGTGTNNNNNAAGAGGAATCCCTGTTGGG	chr11	16111848	16111902	+
SNPexome-37	rs4617548	GCTGCTGCTGCCCAACAGGGNNNNNCTTCAGCTTCCCGATATCCGACGGTAGTGTNNNNNGCTCTCTTCTGTTTAGCAGG	chr11	16111858	16111922	-
MIP-F33	rs4453265	CTAGGATGCTGACTGCAAACGNNNNNCTTCAGCTTCCCGATATCCGACGGTAGTGTNNNNNCCTGAAGAGTTAGACATGC	chr11	74074228	74074282	+
MIP-F113	rs4453265	CCTCACCTACCCAGGAGCATGNNNNNCTTCAGCTTCCCGATATCCGACGGTAGTGTNNNNNAGTCCGCCTGACGCAGGAG	chr11	74074244	74074325	-
MIP-F219	rs2076848	GTTTCATGGGAGTTTCTGATGNNNNNCTTCAGCTTCCCGATATCCGACGGTAGTGTNNNNNCACAGGTATCCTGGCCTCA	chr11	134797610	134797669	-
MIP-F220	rs2076848	GTGGTGAGGCCAGGATACCTNNNNNCTTCAGCTTCCCGATATCCGACGGTAGTGTNNNNNTCAGAAACTCCCATGAAACT	chr11	134797611	134797665	+
SNPexome-38	rs7300444	CAGCACCTCCAAACTTTAGTCNNNNNCTTCAGCTTCCCGATATCCGACGGTAGTGTNNNNNCTCTGCATCATCCCTTAGT	chr12	884711	884765	+
SNPexome-14	rs7300444	GGCCTGTTGTAGACTAAGGGNNNNNCTTCAGCTTCCCGATATCCGACGGTAGTGTNNNNNAGAAAGGAGGTACTACTGGA	chr12	884723	884802	-
MIP-F34	rs2617170	GCTCCAGTACTCCAATACCTAGNNNNNCTTCAGCTTCCCGATATCCGACGGTAGTGTNNNNNCTGTACTAACATCAGAAC	chr12	10408310	10408364	+
MIP-F114	rs2617170	GCAGAAAGGTACATTATGATNNNNNCTTCAGCTTCCCGATATCCGACGGTAGTGTNNNNNTTTTGTAAGAATCACTTTAA	chr12	10408337	10408391	-
MIP-F223	rs1335873	GTACCTGGTACGGGAGAGCATNNNNNCTTCAGCTTCCCGATATCCGACGGTAGTGTNNNNNTTGGACCTACTGCACGTGG	chr13	20327566	20327635	-
MIP-F224	rs1335873	TCATCCACGTGCAGTAGGTCCNNNNNCTTCAGCTTCCCGATATCCGACGGTAGTGTNNNNNCCGTACCAGGTACCTAGCT	chr13	20327572	20327631	+
MIP-F35	rs495680	ATCCGGCAGTGCTGTCCCCNNNNNCTTCAGCTTCCCGATATCCGACGGTAGTGTNNNNNGAAAGTGCCTTGGGGAATGTT	chr13	33129466	33129545	+
MIP-F115	rs495680	CCCAAGGATCACAAACCAGGANNNNNCTTCAGCTTCCCGATATCCGACGGTAGTGTNNNNNGAGGACCTAGATGTGCTGG	chr13	33129486	33129565	-
SNPexome-15	rs9532292	CAGTGCGCAGCTCGTGCTGTGNNNNNCTTCAGCTTCCCGATATCCGACGGTAGTGTNNNNNGTGACCAGCCCTATGAGAG	chr13	38859426	38859505	+
SNPexome-39	rs9532292	ACTTCTCTCATAGGGCTGGTCANNNNNCTTCAGCTTCCCGATATCCGACGGTAGTGTNNNNNTCACAGCACGAGCTGCGC	chr13	38859430	38859509	-
MIP-F221	rs354439	AGAGTTAAGAAAACATCCTGTTNNNNNCTTCAGCTTCCCGATATCCGACGGTAGTGTNNNNNCTCATGTATCACATTCCT	chr13	106286007	106286062	-
MIP-F222	rs354439	AAGGGAAAGAGAAGCCACCANNNNNCTTCAGCTTCCCGATATCCGACGGTAGTGTNNNNNTTCTTAACTCTCAAATTGCA	chr13	106286016	106286090	+
MIP-F227	rs1454361	GGGTCGTAGACTCTATGATATANNNNNCTTCAGCTTCCCGATATCCGACGGTAGTGTNNNNNCTGTCCATCATCAGTAAG	chr14	25381596	25381660	+
MIP-F228	rs1454361	AAGTGTCTTACTGATGATGGACNNNNNCTTCAGCTTCCCGATATCCGACGGTAGTGTNNNNNATCATAGAGTCTACGACC	chr14	25381602	25381661	-
SNPexome-16	rs2297995	CATATTTACAGTAGACCTCGCCNNNNNCTTCAGCTTCCCGATATCCGACGGTAGTGTNNNNNGCAGGATGAGTGCTCTGG	chr14	50302968	50303047	+
SNPexome-40	rs2297995	GCCTCTGCCAGAGCACTCATNNNNNCTTCAGCTTCCCGATATCCGACGGTAGTGTNNNNNAGTTTGGCGAGGTCTACTGT	chr14	50302975	50303054	-
MIP-F116	rs7161192	TGAAGGTAGTGTATGCATCGTNNNNNCTTCAGCTTCCCGATATCCGACGGTAGTGTNNNNNTCGCTTCCTCACTGACACC	chr14	64170385	64170457	+
MIP-F36	rs7161192	GTAGCAGTGTGAGAACCACAGNNNNNCTTCAGCTTCCCGATATCCGACGGTAGTGTNNNNNCCAGCCACCTGCTATCTGC	chr14	64170402	64170476	+
MIP-F163	rs6573560	GCCAGAGTTGCTGATAGCATCNNNNNCTTCAGCTTCCCGATATCCGACGGTAGTGTNNNNNTACACCTGCAGCAGAAGTC	chr14	64564773	64564858	+
MIP-F164	rs6573560;rs4902293	CTGCAAAGTGAACTGCTTTGCNNNNNCTTCAGCTTCCCGATATCCGACGGTAGTGTNNNNNGCCATTCCACTGAGAGATG	chr14	64564813	64564875	-
MIP-F118	rs11158685	GCTTTCCTCCCACTGCACCCTNNNNNCTTCAGCTTCCCGATATCCGACGGTAGTGTNNNNNACCCCTGGGCTGCCTGCCT	chr14	67575844	67575923	+
MIP-F38	rs11158685	TGCACCCTGGTGATCCACCCCANNNNNCTTCAGCTTCCCGATATCCGACGGTAGTGTNNNNNTGCCTGTGCGGGATGCGC	chr14	67575857	67575936	+
MIP-F225	rs873196	CATGCCTGATTGACTCCAACTNNNNNCTTCAGCTTCCCGATATCCGACGGTAGTGTNNNNNAACAGAAAGTCTGTAGACT	chr14	98379152	98379206	+
MIP-F226	rs873196	GGCTATCTGATTCTGAAGTCTANNNNNCTTCAGCTTCCCGATATCCGACGGTAGTGTNNNNNCACAAATGAGCATGCCAA	chr14	98379168	98379237	-
SNPexome-41	rs4577050	GCGCTCGTAAGTATATGCTGNNNNNCTTCAGCTTCCCGATATCCGACGGTAGTGTNNNNNAGTAATGTCTCACCTCTCTG	chr15	34236715	34236779	+
SNPexome-17	rs4577050	GCGAGACAGAGAGGTGAGACNNNNNCTTCAGCTTCCCGATATCCGACGGTAGTGTNNNNNGGCAGCATGACAGTGATATA	chr15	34236721	34236800	-
MIP-F231	rs8037429	GAGGTGTAGCAAAGTGAATGATNNNNNCTTCAGCTTCCCGATATCCGACGGTAGTGTNNNNNAAGTGCTACGTAAGAGGT	chr15	53324690	53324764	-
MIP-F232	rs8037429	GACCTCTTACGTAGCACTTTNNNNNCTTCAGCTTCCCGATATCCGACGGTAGTGTNNNNNCCATAGTAATAATGTAAGAG	chr15	53324709	53324763	+
MIP-F230	rs1528460	GCCAAACATACTTGCTCATAGNNNNNCTTCAGCTTCCCGATATCCGACGGTAGTGTNNNNNCTTCCTCCTGGAGATCAAT	chr15	54918484	54918548	+
MIP-F229	rs1528460	ATATTGATCTCCAGGAGGAAGNNNNNCTTCAGCTTCCCGATATCCGACGGTAGTGTNNNNNGTATGTTTGGCAAATGCAG	chr15	54918486	54918540	-
MIP-F234	rs729172	CCTTGGTCATATTAATGAGGCNNNNNCTTCAGCTTCCCGATATCCGACGGTAGTGTNNNNNTTGAGGAAATATGAACACA	chr16	5556150	5556209	+
MIP-F233	rs729172	GTGTGTTCATATTTCCTCAATANNNNNCTTCAGCTTCCCGATATCCGACGGTAGTGTNNNNNTAATATGACCAAGGCTCC	chr16	5556151	5556205	-
MIP-F167	rs4553648;rs4343301	CAGCTCCACCCACCGCAGTAGNNNNNCTTCAGCTTCCCGATATCCGACGGTAGTGTNNNNNCATACCCGGCCGTCGAAGG	chr16	11385381	11385453	+
MIP-F168	rs4553648;rs4343301	CGTGGTGACCTTCGACGGCCGNNNNNCTTCAGCTTCCCGATATCCGACGGTAGTGTNNNNNGGCATTGGGCTCCTACTGC	chr16	11385389	11385467	-
SNPexome-18	rs2070203	CTTTCCCAGTGTATGGTCGGGNNNNNCTTCAGCTTCCCGATATCCGACGGTAGTGTNNNNNACCATCAGCCAGTGCCACA	chr16	70269663	70269732	+
SNPexome-42	rs2070203	CACTGTGGCACTGGCTGATGGNNNNNCTTCAGCTTCCCGATATCCGACGGTAGTGTNNNNNGGGAAAGTTGGTGCTGAGG	chr16	70269666	70269720	-
MIP-F235	rs1382387	GGTGTTTCTCCTTCGTGCCGNNNNNCTTCAGCTTCCCGATATCCGACGGTAGTGTNNNNNAAATCCCTTAGGATGTTACA	chr16	80072416	80072475	+
MIP-F236	rs1382387	TCCAGAGGCTCTGTAACATCCNNNNNCTTCAGCTTCCCGATATCCGACGGTAGTGTNNNNNTCATTCCCATGTTGTGTAC	chr16	80072427	80072501	-
MIP-F237	rs740910	GAACCTATCTTTGTGTGTTTGNNNNNCTTCAGCTTCCCGATATCCGACGGTAGTGTNNNNNTAACAGTTTGCTAAGTAAG	chr17	5803284	5803338	+
MIP-F238	rs740910	CCTTACTTAGCAAACTGTTANNNNNCTTCAGCTTCCCGATATCCGACGGTAGTGTNNNNNCAAACACACAAAGATAGGTT	chr17	5803285	5803339	-
MIP-F39	rs2159132	GCAGACACACTGTTACCAACANNNNNCTTCAGCTTCCCGATATCCGACGGTAGTGTNNNNNGTAAGCAGGAAACAGGGCC	chr17	14102100	14102174	-
MIP-F119	rs2159132	CAGAAACAGAGCAGACACACTNNNNNCTTCAGCTTCCCGATATCCGACGGTAGTGTNNNNNGTCCCAACAGAAGTAAGCA	chr17	14102110	14102186	-
MIP-F169	rs4393623;rs80097258	CGAAGTGAGTATCCAGCAAANNNNNCTTCAGCTTCCCGATATCCGACGGTAGTGTNNNNNAAATTTGAACTATATGCCTT	chr17	18872553	18872645	+
MIP-F170	rs4393623	GGCAGGAAAAGGAAAAAGAAGANNNNNCTTCAGCTTCCCGATATCCGACGGTAGTGTNNNNNAAACCCAGAAAGCAACAC	chr17	18872581	18872666	-
MIP-F40	rs1292053	GCTTCTGTCAAAAACAAGGTTCNNNNNCTTCAGCTTCCCGATATCCGACGGTAGTGTNNNNNTGCCCGGGCTGTTCTTGT	chr17	59886126	59886205	-
MIP-F120	rs1292053	GTCAACATGCATGCTTCTGTCNNNNNCTTCAGCTTCCCGATATCCGACGGTAGTGTNNNNNCTCTAGTTCCAATTGCCCG	chr17	59886138	59886217	-
MIP-F41	rs1026128	AGCTGGGATGTGCTATGTCGGNNNNNCTTCAGCTTCCCGATATCCGACGGTAGTGTNNNNNACCTGCTCATGTACGTGAA	chr17	73200617	73200686	+
MIP-F121	rs1026128	GCGTCCCGGATTCCCGCGAGNNNNNCTTCAGCTTCCCGATATCCGACGGTAGTGTNNNNNAACAAGAGCGGCTTCTCCAG	chr17	73200650	73200713	-
SNPexome-19	rs1037256	TGCCCTCAACAGTGCCAAGCNNNNNCTTCAGCTTCCCGATATCCGACGGTAGTGTNNNNNATGCATCAAGCACATCGTGG	chr17	73201575	73201629	+
SNPexome-43	rs1037256	CGGATGCAGTCCACGATGTGCNNNNNCTTCAGCTTCCCGATATCCGACGGTAGTGTNNNNNTGGCAGAGTCTGGCCATGA	chr17	73201585	73201664	-
MIP-F241	rs1493232	GTGATTAATTCCTTGAGATGCANNNNNCTTCAGCTTCCCGATATCCGACGGTAGTGTNNNNNGATGTGTCTCAAACTGTT	chr18	1127954	1128008	-
MIP-F242	rs1493232	TTGAGACACATCTAAAACCAACNNNNNCTTCAGCTTCCCGATATCCGACGGTAGTGTNNNNNCTCAAGGAATTAATCACC	chr18	1127955	1128014	+
SNPexome-20	rs9962023	GCGCAGCCGCAGATGCAATTNNNNNCTTCAGCTTCCCGATATCCGACGGTAGTGTNNNNNCACATCAACCACAAACAGCT	chr18	23833852	23833906	-
SNPexome-44	rs9962023	GCAGGCCAGGTGAACATTTACNNNNNCTTCAGCTTCCCGATATCCGACGGTAGTGTNNNNNTACGTGGTTGTGGTCGAGT	chr18	23833889	23833953	+
MIP-F122	rs2586776	TATCTATGAAGAAGGAACCCANNNNNCTTCAGCTTCCCGATATCCGACGGTAGTGTNNNNNGCCCCACAGTCATATTTCT	chr18	50805107	50805185	+
MIP-F42	rs2586776	GGTTATTGAAATCAAAATGGGCNNNNNCTTCAGCTTCCCGATATCCGACGGTAGTGTNNNNNGGCAAGATCCAGGGGAAA	chr18	50805131	50805210	-
MIP-F123	rs1805034	GCTAGAAAACCACCAAATGGTNNNNNCTTCAGCTTCCCGATATCCGACGGTAGTGTNNNNNATAAAACCAAAGCACTGAA	chr18	62359937	62360030	+
MIP-F43	rs1805034	GATGTTCTACTCTCTTTCCAAGGNNNNNCTTCAGCTTCCCGATATCCGACGGTAGTGTNNNNNATCAACCAACAGGCTCT	chr18	62359987	62360061	-
MIP-F44	rs3826616	GTGGCAGGTTCTCTTCTCCGNNNNNCTTCAGCTTCCCGATATCCGACGGTAGTGTNNNNNGTCAGGAATTCCCGGTGCAG	chr18	63987176	63987255	+
MIP-F124	rs3826616	CTCCATTCTGCTGCACCGGGANNNNNCTTCAGCTTCCCGATATCCGACGGTAGTGTNNNNNGCTCCTCTTTACGGAGAAG	chr18	63987186	63987267	-
MIP-F239	rs1024116	TCACTCCCTGGACGTTATTGNNNNNCTTCAGCTTCCCGATATCCGACGGTAGTGTNNNNNGTAAATACAAAGGCATACTT	chr18	77720421	77720485	+
MIP-F240	rs1024116	CACTTAATAAAGTATGCCTTTGNNNNNCTTCAGCTTCCCGATATCCGACGGTAGTGTNNNNNTAACGTCCAGGGAGTGAA	chr18	77720430	77720484	-
MIP-F125	rs966591	CCGTTAAGAAACACATGAGAANNNNNCTTCAGCTTCCCGATATCCGACGGTAGTGTNNNNNCACAGGAGAATACATAATG	chr19	7083566	7083619	+
MIP-F45	rs966591	CTCATAGGATTTCTCTCCATTANNNNNCTTCAGCTTCCCGATATCCGACGGTAGTGTNNNNNGGGTTTTTTTCCAGTGTG	chr19	7083583	7083642	-
MIP-F126	rs2217652	CCCAGGAATGTTCTGCATAGCNNNNNCTTCAGCTTCCCGATATCCGACGGTAGTGTNNNNNCCCTGCTTTGGGTGCTGAT	chr19	9380113	9380206	-
MIP-F46	rs2217652	ATGAGTTAAAACATCAGCACCCNNNNNCTTCAGCTTCCCGATATCCGACGGTAGTGTNNNNNGCAGAACATTCCTGGGGG	chr19	9380115	9380194	+
SNPexome-45	rs2228611	CTTCTCGATGAGGCCGGTGTNNNNNCTTCAGCTTCCCGATATCCGACGGTAGTGTNNNNNAGTGTGCCCCAAACATAATC	chr19	10156375	10156454	+
SNPexome-21	rs2228611	TCCGGGATTATGTTTGGGGCACNNNNNCTTCAGCTTCCCGATATCCGACGGTAGTGTNNNNNTCGACACCGGCCTCATCG	chr19	10156380	10156459	-
MIP-F245	rs1031825	AAGATAAGGCAGCATGGGCTCNNNNNCTTCAGCTTCCCGATATCCGACGGTAGTGTNNNNNACTGCTTTCAAGTATGCTC	chr20	4466781	4466840	-
MIP-F246	rs1031825	ATCCTTGGCATAGGGCTTGGNNNNNCTTCAGCTTCCCGATATCCGACGGTAGTGTNNNNNCATTATGGTCCTTAACCTAT	chr20	4466806	4466880	+
SNPexome-46	rs10373	GTGTGACGTCTTTCTGCTGCNNNNNCTTCAGCTTCCCGATATCCGACGGTAGTGTNNNNNGTTTCTAATACAGAGAAACC	chr20	6119384	6119463	+
SNPexome-22	rs10373	CAGATCAGTAAGTTACTCTTGCNNNNNCTTCAGCTTCCCGATATCCGACGGTAGTGTNNNNNCCAATGAAGAGCAGCAGA	chr20	6119411	6119475	-
MIP-F243	rs1005533	GAGGCATAAGGAGCTGGAGGNNNNNCTTCAGCTTCCCGATATCCGACGGTAGTGTNNNNNGTTTGTGTGTGAGTGTTTCA	chr20	40858414	40858488	+
MIP-F244	rs1005533	GCTCCTGGTTGGCGATGTTAAANNNNNCTTCAGCTTCCCGATATCCGACGGTAGTGTNNNNNCAAGACCAGGGAAGCTGC	chr20	40858448	40858522	-
MIP-F47	rs11780	GACATCATGGATAAGGGGGTAGNNNNNCTTCAGCTTCCCGATATCCGACGGTAGTGTNNNNNATGGAGGGATTCTGGAGA	chr20	44938093	44938167	-
MIP-F127	rs11780	CCATGCCAAGGTAAGCAGGAGNNNNNCTTCAGCTTCCCGATATCCGACGGTAGTGTNNNNNGTCCACACCCAGCTGGCTG	chr20	44938109	44938181	+
MIP-F48	rs2296241	GTGATGAAAGAGGCCACGTTGNNNNNCTTCAGCTTCCCGATATCCGACGGTAGTGTNNNNNGTTTTCCTTCAACGGCTTT	chr20	54169652	54169721	-
MIP-F128	rs2296241	CACTGAGCTAACTTCAGGTCNNNNNCTTCAGCTTCCCGATATCCGACGGTAGTGTNNNNNTCTATTCTGCCCATAAAATC	chr20	54169680	54169754	+
MIP-F171	rs2822785;rs2822786	CGCCACACACGTCTCAAGTCTNNNNNCTTCAGCTTCCCGATATCCGACGGTAGTGTNNNNNACATGTGGCATCACTGGAA	chr21	14582190	14582274	-
MIP-F172	rs2822785;rs2822786	CCAGTGATGCCACATGTAAGCNNNNNCTTCAGCTTCCCGATATCCGACGGTAGTGTNNNNNGTGTGGCGAATACAAGAGG	chr21	14582201	14582276	+
MIP-F249	rs2831700	GACAGATAATTGTGGTTCTAGGNNNNNCTTCAGCTTCCCGATATCCGACGGTAGTGTNNNNNATAGCTGATGTAGGCTGG	chr21	28307309	28307383	+
MIP-F250	rs2831700	TTTCCCAGCCTACATCAGCTNNNNNCTTCAGCTTCCCGATATCCGACGGTAGTGTNNNNNTCCCTAGAACCACAATTATC	chr21	28307313	28307387	-
MIP-F247	rs914165	AGGCAGCTCTGCTGAGCCCGNNNNNCTTCAGCTTCCCGATATCCGACGGTAGTGTNNNNNGACCCTGTGGAAAGAGAAAC	chr21	41043952	41044011	+
MIP-F248	rs914165	GCATCCAGGCTCTGCTGCTTGNNNNNCTTCAGCTTCCCGATATCCGACGGTAGTGTNNNNNAATCACGGAGTGCAGACCA	chr21	41043983	41044057	-
SNPexome-47	rs4148973	GGTCACTCCTCGAGTGGTGAGNNNNNCTTCAGCTTCCCGATATCCGACGGTAGTGTNNNNNAGAAGCTCGTCAGGTGGGT	chr21	42903448	42903527	+
SNPexome-23	rs4148973	TCACTTTCCGACCCACCTGACNNNNNCTTCAGCTTCCCGATATCCGACGGTAGTGTNNNNNTGCCTTTGCTCACCACTCG	chr21	42903458	42903537	-
SNPexome-24	rs4675	GGTGGACAGCGGCATGAACCCNNNNNCTTCAGCTTCCCGATATCCGACGGTAGTGTNNNNNATGAAGAGCAGGCAGCTGG	chr22	20786962	20787016	-
SNPexome-48	rs4675	GCAGGTCCTAGAGGTGGAGGTNNNNNCTTCAGCTTCCCGATATCCGACGGTAGTGTNNNNNCAAGTCCGCTTCACTGTCG	chr22	20786981	20787055	+
MIP-F49	rs2267161	CTAGTGAAGAGCGCGCCCAGCACNNNNNCTTCAGCTTCCCGATATCCGACGGTAGTGTNNNNNACACCCATCATCTGCCC	chr22	30557247	30557321	+
MIP-F129	rs2267161	GCTGCATGCCGGCCTGGCCTNNNNNCTTCAGCTTCCCGATATCCGACGGTAGTGTNNNNNTCCATGGCTAAGGGGCTGGT	chr22	30557286	30557342	-
MIP-F50	rs760482	GGGTAAGCCCCAGGGGAGGNNNNNCTTCAGCTTCCCGATATCCGACGGTAGTGTNNNNNTCTCCTCCAGTGGTCACAGTG	chr22	38782665	38782739	-
MIP-F130	rs760482	GTGACCACTGGAGGAGAGTGNNNNNCTTCAGCTTCCCGATATCCGACGGTAGTGTNNNNNCCTGACCAGAGGGAAGGTCT	chr22	38782683	38782743	+
MIP-F251	rs2040411	AAATACAGAGAACACTCAGCACNNNNNCTTCAGCTTCCCGATATCCGACGGTAGTGTNNNNNAATCACTGCACAGGGAGA	chr22	47440647	47440716	-
MIP-F252	rs2040411	GAAAATCTCCCTGTGCAGTGNNNNNCTTCAGCTTCCCGATATCCGACGGTAGTGTNNNNNGCTGAGTGTTCTCTGTATTT	chr22	47440647	47440711	+
MIP-F51	rs3829990	CTCCAAGCACTGCTGTGTGATNNNNNCTTCAGCTTCCCGATATCCGACGGTAGTGTNNNNNTTTCTTGGAAACCAGTAGA	chrX	15397408	15397477	+
MIP-F175	rs3829990	CTTAACATGTACTTTCTACTGGNNNNNCTTCAGCTTCCCGATATCCGACGGTAGTGTNNNNNAATAGAACCTCATCACAC	chrX	15397422	15397491	-
MIP-F52	rs1368769;rs12557898	GCCCAATCCACCAGCACATCTGCTNNNNNCTTCAGCTTCCCGATATCCGACGGTAGTGTNNNNNGAGGAAGAATCTCCCC	chrX	27821425	27821504	+
MIP-F176	rs1368769;rs12557898	TTCAAACAAGCAGAGGCAGAGGNNNNNCTTCAGCTTCCCGATATCCGACGGTAGTGTNNNNNTAGCAGATGTGCTGGTGG	chrX	27821447	27821511	-
MIP-F53	rs6638409	AGAGAAACCTGAGCCATCACCNNNNNCTTCAGCTTCCCGATATCCGACGGTAGTGTNNNNNCCAAACTCTTTAGTACCTC	chrX	53632084	53632163	+
MIP-F54	rs2296765	ACAGGGCCAAGGGTCAGCANNNNNCTTCAGCTTCCCGATATCCGACGGTAGTGTNNNNNAACCAGGATGGAAACATGGGA	chrX	70030406	70030485	+
MIP-F177	rs7891967	AACTCGACAGCCTAATACACANNNNNCTTCAGCTTCCCGATATCCGACGGTAGTGTNNNNNGTATCAGTACTCAATTTGG	chrX	73838620	73838674	+
MIP-F55	rs7891967	CTTGACCTTTCCAAATTGAGTNNNNNCTTCAGCTTCCCGATATCCGACGGTAGTGTNNNNNGTGGCCATGTACAGTTATA	chrX	73838630	73838709	-
MIP-F56	rs61741568;rs41310673	ATATGGACACCTGAGATTGTGNNNNNCTTCAGCTTCCCGATATCCGACGGTAGTGTNNNNNAGGGCCTTGTCTGGTCAAC	chrX	73842780	73842859	+
MIP-F57	rs2073787	GTGAGGATATTGCTTCAGAGTNNNNNCTTCAGCTTCCCGATATCCGACGGTAGTGTNNNNNAGATCTGACATGAGCGGGG	chrX	110451429	110451503	-
MIP-F178	rs2073787	CCCGCTCATGTCAGATCTAGNNNNNCTTCAGCTTCCCGATATCCGACGGTAGTGTNNNNNTCTGAAGCAATATCCTCACT	chrX	110451430	110451504	+
MIP-F58	rs6568050	ATCCAACCACGGAGAACACTGCNNNNNCTTCAGCTTCCCGATATCCGACGGTAGTGTNNNNNGTGCACGAAATCATCATC	chrX	112454755	112454819	+
MIP-F59	rs5930933	AGGGGTATTCAAAGATGTGGCANNNNNCTTCAGCTTCCCGATATCCGACGGTAGTGTNNNNNGGAGTAGAGATCTCAGCT	chrX	136349158	136349237	-
MIP-F60	rs1190736	ACAATGGTGTTGACGCTGGCGAAGNNNNNCTTCAGCTTCCCGATATCCGACGGTAGTGTNNNNNGGCGCTGGGTCATCTT	chrX	137031252	137031306	+
MIP-F179	rs1190736	GTCAGTGGATCGCTACTTGTCNNNNNCTTCAGCTTCCCGATATCCGACGGTAGTGTNNNNNTCAACAGCCACTTCTGCAC	chrX	137031301	137031360	-
MIP-F61	rs2269415	GTGCCTGCATTACTCAGGTGNNNNNCTTCAGCTTCCCGATATCCGACGGTAGTGTNNNNNTGTGGGGCCGTAACGTCTAT	chrX	153558217	153558286	+
MIP-F180	rs2269415	CTTGGAGATGCTGTCATAGACGNNNNNCTTCAGCTTCCCGATATCCGACGGTAGTGTNNNNNCCTGAGTAATGCAGGCAC	chrX	153558232	153558286	-
MIP-F62	SRY	ACTAAACATAAGAAAGTGAGGGCNNNNNCTTCAGCTTCCCGATATCCGACGGTAGTGTNNNNNGACACAACTTGTCTTGA	chrY	2786824	2786903	+
MIP-F63	SRY	CGGTAAGTGGCCTAGCTGGTGNNNNNCTTCAGCTTCCCGATATCCGACGGTAGTGTNNNNNTAGGTAGGTCTTTGTAGCC	chrY	2786972	2787051	+
MIP-F64	SRY	GCACTTCGCTGCAGAGTACCGAAGNNNNNCTTCAGCTTCCCGATATCCGACGGTAGTGTNNNNNTGGCTGCGTTGATGGG	chrY	2787052	2787131	+
MIP-F65	SRY	CCGCAGATCCCGCTTCGGTACNNNNNCTTCAGCTTCCCGATATCCGACGGTAGTGTNNNNNCACAGAAATTACAGGCCAT	chrY	2787168	2787247	-
MIP-F66	SRY	CACTCTATCCTGGACGTTGCNNNNNCTTCAGCTTCCCGATATCCGACGGTAGTGTNNNNNGCTGCTTGCTGATCTCTGAG	chrY	2787344	2787423	+
MIP-F67	SRY	AAGCGACCCATGAACGCATTCNNNNNCTTCAGCTTCCCGATATCCGACGGTAGTGTNNNNNCTCCGGAGAAGCTCTTCCT	chrY	2787424	2787503	-
MIP-F173	SRY	GCGATGATTACAGTCCAGCTGTNNNNNCTTCAGCTTCCCGATATCCGACGGTAGTGTNNNNNAGTTTCGAACTCTGGCAC	chrY	2787564	2787638	-
MIP-F69	SRY	GTAATGAAACTTGCATTTCTCCGNNNNNCTTCAGCTTCCCGATATCCGACGGTAGTGTNNNNNCAAGGAGAGTGCGACAA	chrY	2787630	2787709	+
MIP-F70	SRY	GGGTGTTGAGGGCGGAGAAANNNNNCTTCAGCTTCCCGATATCCGACGGTAGTGTNNNNNAGCAGGGCAAGTAGTCAACG	chrY	2787745	2787824	-
MIP-F71	AMELY	AATGTACCAATAGTAGACAATANNNNNCTTCAGCTTCCCGATATCCGACGGTAGTGTNNNNNAGGAACTGAAGTAAACAC	chrY	6865957	6866036	-
MIP-F72	AMELY	TTGTCAAACCAATGTACAACCACNNNNNCTTCAGCTTCCCGATATCCGACGGTAGTGTNNNNNCTGGTCTTTTAATCCTG	chrY	6866082	6866161	+
MIP-F174	AMELY	CACAGAGAGAACATGTGCTTTANNNNNCTTCAGCTTCCCGATATCCGACGGTAGTGTNNNNNCCATAAATAGCTTTGTCA	chrY	6866492	6866560	+
MIP-F74	AMELY	CCATCTACCTTTCATAGCTTGTTCNNNNNCTTCAGCTTCCCGATATCCGACGGTAGTGTNNNNNGGACTCTAACAGCATG	chrY	6867502	6867581	+
MIP-F75	AMELY	CAGACACTAATGGGAAATTTAGTNNNNNCTTCAGCTTCCCGATATCCGACGGTAGTGTNNNNNACCACCAGTATGTAGAC	chrY	6868642	6868721	-
MIP-F76	AMELY	GCTAAATGATTGTCCCTGGGGNNNNNCTTCAGCTTCCCGATATCCGACGGTAGTGTNNNNNAAATCTATATAGTACAGAA	chrY	6870203	6870282	+
MIP-F77	AMELY	TCTCCCAGTGTTTTTATGGCAGNNNNNCTTCAGCTTCCCGATATCCGACGGTAGTGTNNNNNATTAATGAATGCCAGAAC	chrY	6870664	6870743	+
MIP-F78	AMELY	GCATGAAAGACATTATACTAAGCANNNNNCTTCAGCTTCCCGATATCCGACGGTAGTGTNNNNNATTTACAGGGTGGAAA	chrY	6872272	6872351	+
MIP-F79	AMELY	GTGACTCCAAAACAATAAAATGGANNNNNCTTCAGCTTCCCGATATCCGACGGTAGTGTNNNNNGGAATATGGCATTCCA	chrY	6872797	6872876	-
MIP-F80	AMELY	ATTGATTCTTCAGTAAGTTTTGGNNNNNCTTCAGCTTCCCGATATCCGACGGTAGTGTNNNNNAGAGCTTCAGGCAGGTA	chrY	6873194	6873273	+
